# Supplementary material for: Fluor-rewitzerite, [(H2O)K]Mn2(Al2Ti)(PO4)4(OF)(H2O)10 ⋅ 4H2O, a new paulkerrite-group mineral, from the Hagendorf-Süd pegmatite, Oberpfalz, Bavaria, Germany
Source: Copernicus journal article supplement (doi:10.5194/ejm-36-541-2024), 2024-06-26
Supplement: Supplementary file 1 [file ejm-36-541-2024-supplement.pdf]

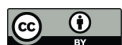

*Supplement of*

**Fluor-rewitzerite,  $[(\text{H}_2\text{O})\text{K}]\text{Mn}_2(\text{Al}_2\text{Ti})(\text{PO}_4)_4(\text{OF})(\text{H}_2\text{O})_{10} \cdot 4\text{H}_2\text{O}$ , a new paulkerrite-group mineral, from the Hagendorf-Süd pegmatite, Oberpfalz, Bavaria, Germany**

**Rupert Hochleitner et al.**

*Correspondence to:* Ian E. Grey ([ian.grey@csiro.au](mailto:ian.grey@csiro.au))

The copyright of individual parts of the supplement might differ from the article licence.

```
#=====
data_global
#=====
```

```
_audit_creation_method          'Jana2006 Version : 20/02/2023'
```

```
# 1. PROCESSING SUMMARY (IUCr Office Use Only)
```

```
_journal_date_recd_electronic    ?
_journal_date_to_coeditor        ?
_journal_date_from_coeditor      ?
_journal_date_accepted           ?
_journal_date_printers_first     ?
_journal_date_printers_final     ?
_journal_date_proofs_out         ?
_journal_date_proofs_in         ?
_journal_coeditor_name           ?
_journal_coeditor_code           ?
_journal_coeditor_notes         ?
; ?
;
_journal_techeditor_code         ?
_journal_paper_category          ?
_journal_techeditor_notes       ?
; ?
;
_journal_coden_ASTM              ?
_journal_name_full               'Acta Crystallographica Section
C'
_journal_year                    ?
_journal_volume                  ?
_journal_issue                   ?
_journal_page_first              ?
_journal_page_last               ?
_journal_suppl_publ_number       ?
_journal_suppl_publ_pages        ?
```

```
#=====
```

```
# 2. SUBMISSION DETAILS
```

```
_publ_contact_author_name       ?
_publ_contact_author_address    ?
; ?
;
_publ_contact_author_email      ?
_publ_contact_author_fax        ?
_publ_contact_author_phone      ?

_publ_requested_journal         'Acta Crystallographica Section
C'
_publ_requested_category        ?

_publ_contact_letter            ?
; ?
;
```

#=====

# 3. TITLE AND AUTHOR LIST

```
_publ_section_title
; ?
;
_publ_section_title_footnote
; ?
;
loop_
  _publ_author_name
  _publ_author_footnote
  _publ_author_address
; ?      # name
;
; ?      # footnote
;
; ?      # address
;

```

#=====

# 4. TEXT

```
_publ_section_synopsis
; ?
;
_publ_section_abstract
; ?
;
_publ_section_comment
; ?
;
_publ_section_introduction
; ?
;
_publ_section_experimental
; ?
;
_publ_section_exptl_prep
; ?
;
_publ_section_exptl_refinement
; ?
;
_publ_section_exptl_solution
; ?
;
_publ_section_discussion
; ?
;
_publ_section_acknowledgements
; ?
;
_publ_section_references
;

```

Petricek, V., Dusek, M. & Palatinus L. (2014). Z. Kristallogr. 229(5), 345-352.

Palatinus L. & Chapuis G. (2007). J. Appl. Cryst. 40, 786-790.

# enable this reference if Diamond ver. 2 was used for visualization  
#Brandenburg, K. (1999). DIAMOND. Version. 2.1c.  
#Crystal Impact GbR, Bonn, Germany.

# enable this reference if Diamond ver. 3 was used for visualization  
#Brandenburg, K. & Putz, H. (2005). DIAMOND Version 3.  
#Crystal Impact GbR, Postfach 1251, D-53002 Bonn, Germany.

# enable this reference if SIR97 was used for solving of the structure  
#Altomare, A., Burla, M. C., Camalli, M., Cascarano, G., Giacovazzo, C.,  
#Guagliardi, A., Moliterni, A. G. G., Polidori, G., Spagna, R. (1997).  
#SIR97. A Package for Crystal Structure Solution by Direct Methods  
#and Refinement, Bari, Rome, Italy.

# use this reference if SIR2002 was used for solving of the structure  
#Burla, M.C., Camalli, M., Carrozzini, B., Cascarano, G., Giacovazzo, C.,  
#Polidori, G., Spagna, R.  
#SIR2002: the program, J. Appl. Cryst, (2003). 36, 1103

# use this reference if SIR2011 was used for solving of the structure  
#Burla, M.C., Caliandro, R., Camalli, M., Carrozzini, B., Cascarano,  
#G.L., Giacovazzo, C., Mallamo, M., Mazzone, A., Polidori, G., Spagna, R.  
#SIR2011: a new package for crystal structure determination and  
refinement,  
#J.Appl.Cryst. (2012) 45, 357-361

# enable this reference if bond valences were calculated  
#Brown, I. D. (1996). J. Appl. Cryst. 29, 479-480.

# enable this reference if Xshape was used for crystal shape refinement  
#Stoe & Cie (1998). X-SHAPE. Stoe & Cie, Darmstadt, Germany.

# enable this reference if Flack coefficient was refined  
#Flack, H. D. (1983). Acta Cryst. A39, 876-881.

```
;  
_publ_section_figure_captions  
; ?  
;  
_publ_section_table_legends  
; ?  
;
```

```
#####  
data_I  
#####
```

# 5. CHEMICAL DATA

```
_chemical_name_systematic  
; ?  
;
```

\_chemical\_name\_common ?  
\_chemical\_formula\_moiety ?  
\_chemical\_formula\_structural ?  
\_chemical\_formula\_analytical ?  
\_chemical\_formula\_iupac ?  
\_chemical\_formula\_sum  
'H25 O32.782 Mg0.114 Al1.789 P4 K1.018 Ti1.211 Mn1.886'  
\_chemical\_formula\_weight 926  
\_chemical\_melting\_point ?  
\_chemical\_compound\_source ?  
\_chemical\_absolute\_configuration .

#=====

# 6. CRYSTAL DATA

\_symmetry\_cell\_setting monoclinic  
\_symmetry\_space\_group\_name\_H-M 'P 1 21/c 1'  
\_symmetry\_space\_group\_name\_Hall '-P 2ycb'  
\_symmetry\_Int\_Tables\_number 14

loop\_

\_space\_group\_symop\_id  
\_space\_group\_symop\_operation\_xyz  
1 x, y, z  
2 -x, y+1/2, -z+1/2  
3 -x, -y, -z  
4 x, -y+1/2, z+1/2

\_cell\_length\_a 10.407  
\_cell\_length\_b 20.514  
\_cell\_length\_c 12.193  
\_cell\_angle\_alpha 90  
\_cell\_angle\_beta 90.46  
\_cell\_angle\_gamma 90  
\_cell\_volume 2602.99

loop\_

\_twin\_individual\_id  
\_twin\_individual\_mass\_fraction\_refined  
\_twin\_individual\_twin\_matrix\_11  
\_twin\_individual\_twin\_matrix\_12  
\_twin\_individual\_twin\_matrix\_13  
\_twin\_individual\_twin\_matrix\_21  
\_twin\_individual\_twin\_matrix\_22  
\_twin\_individual\_twin\_matrix\_23  
\_twin\_individual\_twin\_matrix\_31  
\_twin\_individual\_twin\_matrix\_32  
\_twin\_individual\_twin\_matrix\_33  
1 0.804(3)  
1 0 0  
0 1 0  
0 0 1  
2 0.196(3)  
-1 0 0  
0 -1 0  
-0.0137 0 1

```

_cell_formula_units_Z          4

_cell_measurement_reflns_used  47535
_cell_measurement_theta_min    1.94
_cell_measurement_theta_max    32.05
_cell_measurement_temperature  100
_cell_special_details
; ?
;

_exptl_crystal_density_diffn   2.3629
_exptl_crystal_density_meas    ?
_exptl_crystal_density_method  ?
_exptl_crystal_F_000          1860

_exptl_absorpt_coefficient_mu  1.87
_exptl_crystal_description     'blade'
_exptl_crystal_size_max        0.070
_exptl_crystal_size_mid        0.050
_exptl_crystal_size_min        0.040
_exptl_crystal_size_rad        ?
_exptl_crystal_colour          ?
_exptl_absorpt_correction_type 'multi-scan'
_exptl_absorpt_process_details ?
_exptl_absorpt_correction_T_min 0.42
_exptl_absorpt_correction_T_max 0.75
loop_
_exptl_crystal_face_index_h    ?
_exptl_crystal_face_index_k    ?
_exptl_crystal_face_index_l    ?
_exptl_crystal_face_perp_dist  ? ? ? ?

#=====

# 7. EXPERIMENTAL DATA

_exptl_special_details         ?

_diffn_ambient_temperature     100
_diffn_source                   ?
_diffn_source_power             ?
_diffn_source_voltage           ?
_diffn_source_current           ?
_diffn_radiation_type           'synchrotron'
_diffn_radiation_source         'synchrotron'
_diffn_radiation_wavelength     0.7109
_diffn_radiation_monochromator  ?
_diffn_measurement_device       'image plate'
_diffn_measurement_device_type  'Dectris Eiger'
_diffn_detector                 ?
_diffn_detector_area_resol_mean ?
_diffn_measurement_method       ?
_diffn_measurement_specimen_support ?

_diffn_reflns_number           47535
_diffn_reflns_theta_min        1.94
_diffn_reflns_theta_max        32.05

```

```

_diffrn_reflns_theta_full          28.02
_diffrn_measured_fraction_theta_max 0.83
_diffrn_measured_fraction_theta_full 0.98
_diffrn_reflns_av_R_equivalents    0.0648
_diffrn_reflns_av_unetI/netI       0.0418
_diffrn_reflns_limit_h_min         -13
_diffrn_reflns_limit_h_max         13
_diffrn_reflns_limit_k_min         -28
_diffrn_reflns_limit_k_max         28
_diffrn_reflns_limit_l_min         -16
_diffrn_reflns_limit_l_max         16
_diffrn_reflns_reduction_process    ?

_diffrn_standards_number            ?
_diffrn_standards_interval_count     ?
_diffrn_standards_interval_time     ?
_diffrn_standards_decay_%           ?
loop_
_diffrn_standard_refl_n_index_h     ?
_diffrn_standard_refl_n_index_k     ?
_diffrn_standard_refl_n_index_l     ?
? ? ?

_diffrn_radiation_probe              X-ray

#=====

# 8. REFINEMENT DATA

_refine_special_details
; ?
;

_reflns_number_total                6931
_reflns_number_gt                   6186
_reflns_threshold_expression         'I>3\s(I) '

_refine_ls_structure_factor_coef     F
_refine_ls_R_factor_gt               0.0582
_refine_ls_wR_factor_gt              0.0759
_refine_ls_R_factor_all              0.0625
_refine_ls_wR_factor_ref              0.0767
_refine_ls_goodness_of_fit_ref       2.84
_refine_ls_goodness_of_fit_gt       2.98
_refine_ls_restrained_S_gt           ?
_refine_ls_restrained_S_all         ?
_refine_ls_number_reflns             6931
_refine_ls_number_parameters         477
_refine_ls_number_restraints         35
_refine_ls_number_constraints        89
_refine_ls_weighting_scheme          sigma
_refine_ls_weighting_details         'w=1/(\s^2^(F)+0.000064F^2^)'
_refine_ls_hydrogen_treatment        'refall'
_refine_ls_shift/su_max               0.0429
_refine_ls_shift/su_mean             0.0024
_refine_diff_density_max              0.99
_refine_diff_density_min             -1.25
_refine_ls_extinction_method          'none'

```

\_refine\_ls\_extinction\_coef ?  
\_refine\_ls\_extinction\_expression ?  
\_refine\_ls\_abs\_structure\_details ?  
\_refine\_ls\_abs\_structure\_Flack ?  
\_refine\_ls\_abs\_structure\_Rogers ?

loop\_

\_atom\_type\_symbol  
\_atom\_type\_scatter\_dispersion\_real  
\_atom\_type\_scatter\_dispersion\_imag  
\_atom\_type\_scatter\_source  
Al 0.0645 0.0514  
'International Tables Vol C tables 4.2.6.8 and 6.1.1.1'  
F 0.0171 0.0103  
'International Tables Vol C tables 4.2.6.8 and 6.1.1.1'  
Fe 0.3463 0.8444  
'International Tables Vol C tables 4.2.6.8 and 6.1.1.1'  
H 0.0000 0.0000  
'International Tables Vol C tables 4.2.6.8 and 6.1.1.1'  
K 0.2009 0.2494  
'International Tables Vol C tables 4.2.6.8 and 6.1.1.1'  
Mg 0.0486 0.0363  
'International Tables Vol C tables 4.2.6.8 and 6.1.1.1'  
Mn 0.3368 0.7283  
'International Tables Vol C tables 4.2.6.8 and 6.1.1.1'  
O 0.0106 0.0060  
'International Tables Vol C tables 4.2.6.8 and 6.1.1.1'  
P 0.1023 0.0942  
'International Tables Vol C tables 4.2.6.8 and 6.1.1.1'  
Ti 0.2776 0.4457  
'International Tables Vol C tables 4.2.6.8 and 6.1.1.1'

\_computing\_data\_collection ?  
\_computing\_cell\_refinement ?  
\_computing\_data\_reduction ?  
\_computing\_structure\_solution ?  
\_computing\_structure\_refinement ?  
\_computing\_molecular\_graphics ?  
\_computing\_publication\_material ?

loop\_

\_restr\_distance\_atom\_site\_label\_1  
\_restr\_distance\_site\_symmetry\_1  
\_restr\_distance\_atom\_site\_label\_2  
\_restr\_distance\_site\_symmetry\_2  
\_restr\_distance\_target  
\_restr\_distance\_target\_weight\_param  
H9a1 . O9a . 0.85 0.01  
H9a2 . O9a . 0.85 0.01  
H9b1 . O9b . 0.85 0.01  
H10a2 . O10a . 0.85 0.01  
H10b1 . O10b . 0.85 0.01  
H10b2 . O10b . 0.85 0.01  
H11a1 . O11a . 0.85 0.01  
H11a2 . O11a . 0.85 0.01  
H11b1 . O11b . 0.85 0.01  
H11b2 . O11b . 0.85 0.01  
H12a1 . O12a . 0.85 0.01



H12a2 . O12a . 0.85 0.01  
H12b1 . O12b . 0.85 0.01  
H13a1 . O13a . 0.85 0.01  
H13a2 . O13a . 0.85 0.01  
H13b1 . O13b . 0.85 0.01  
H13b2 . O13b . 0.85 0.01  
H14a1 . O14a . 0.85 0.01  
H14a2 . O14a . 0.85 0.01  
H14b1 . O14b . 0.85 0.01  
H14b2 . O14b . 0.85 0.01  
H15a1 . O15a . 0.85 0.01  
H15b1 . O15b . 0.85 0.01  
H15b2 . O15b . 0.85 0.01  
Hala . Ow1 . 0.85 0.01

loop\_  
\_restr\_angle\_atom\_site\_label\_1  
\_restr\_angle\_site\_symmetry\_1  
\_restr\_angle\_atom\_site\_label\_2  
\_restr\_angle\_site\_symmetry\_2  
\_restr\_angle\_atom\_site\_label\_3  
\_restr\_angle\_site\_symmetry\_3  
\_restr\_angle\_target  
\_restr\_angle\_target\_weight\_param  
H9a1 . O9a . H9a2 . 109.47 0.05  
H10b1 . O10b . H10b2 . 109.47 0.05  
H11a1 . O11a . H11a2 . 109.47 0.05  
H11b1 . O11b . H11b2 . 109.47 0.05  
H12a1 . O12a . H12a2 . 109.47 0.05  
H13a1 . O13a . H13a2 . 109.47 0.05  
H13b1 . O13b . H13b2 . 109.47 0.05  
H14a1 . O14a . H14a2 . 109.47 0.05  
H14b1 . O14b . H14b2 . 109.47 0.05  
H15b1 . O15b . H15b2 . 109.47 0.05

loop\_  
\_restr\_torsion\_atom\_site\_label\_1  
\_restr\_torsion\_site\_symmetry\_1  
\_restr\_torsion\_atom\_site\_label\_2  
\_restr\_torsion\_site\_symmetry\_2  
\_restr\_torsion\_atom\_site\_label\_3  
\_restr\_torsion\_site\_symmetry\_3  
\_restr\_torsion\_atom\_site\_label\_4  
\_restr\_torsion\_site\_symmetry\_4  
\_restr\_torsion\_angle\_target  
\_restr\_torsion\_weight\_param  
? ? ? ? ? ? ? ? ? ?

loop\_  
\_restr\_equal\_distance\_atom\_site\_label\_1  
\_restr\_equal\_distance\_site\_symmetry\_1  
\_restr\_equal\_distance\_atom\_site\_label\_2  
\_restr\_equal\_distance\_site\_symmetry\_2  
\_restr\_equal\_distance\_class\_class\_id  
\_restr\_equal\_distance\_class\_target\_weight\_param  
? ? ? ? ? ?

loop\_

```
_restr_equal_angle_atom_site_label_1
_restr_equal_angle_site_symmetry_1
_restr_equal_angle_atom_site_label_2
_restr_equal_angle_site_symmetry_2
_restr_equal_angle_atom_site_label_3
_restr_equal_angle_site_symmetry_3
_restr_equal_angle_class_class_id
_restr_equal_angle_class_target_weight_param
? ? ? ? ? ? ? ?
```

```
loop_
_restr_equal_torsion_atom_site_label_1
_restr_equal_torsion_site_symmetry_1
_restr_equal_torsion_atom_site_label_2
_restr_equal_torsion_site_symmetry_2
_restr_equal_torsion_atom_site_label_3
_restr_equal_torsion_site_symmetry_3
_restr_equal_torsion_atom_site_label_4
_restr_equal_torsion_site_symmetry_4
_restr_equal_torsion_class_class_id
_restr_equal_torsion_class_target_weight_param
? ? ? ? ? ? ? ? ? ?
```

```
#=====
```

```
# 9. ATOMIC COORDINATES AND DISPLACEMENT PARAMETERS
```

```
loop_
_atom_site_label
_atom_site_type_symbol
_atom_site_fract_x
_atom_site_fract_y
_atom_site_fract_z
_atom_site_adp_type
_atom_site_U_iso_or_equiv
_atom_site_site_symmetry_multiplicity
_atom_site_occupancy
_atom_site_calc_flag
_atom_site_refinement_flags
_atom_site_disorder_assembly
_atom_site_disorder_group
M1a1 Mn 0.49393(4) 0.746848(17) 0.24525(3) Uani 0.01738(16) 4 0.940(7)
d . . .
M1b1 Mn 0.99657(4) -0.246861(17) -0.24225(3) Uani 0.01838(16) 4
0.946(7) d . . .
M1a2 Mg 0.49393(4) 0.746848(17) 0.24525(3) Uani 0.01738(16) 4 0.060(7)
d . . .
M1b2 Mg 0.99657(4) -0.246861(17) -0.24225(3) Uani 0.01838(16) 4
0.054(7) d . . .
M2a1 Al 0.65985(8) 0.50245(3) 0.74352(7) Uani 0.0192(3) 4 0.593(12) d .
.
M2b1 Al 1.16020(7) -0.00241(2) -0.74189(6) Uani 0.0195(3) 4 0.476(11) d
.
.
M2a2 Ti 0.65985(8) 0.50245(3) 0.74352(7) Uani 0.0192(3) 4 0.407(12) d .
.
M2b2 Ti 1.16020(7) -0.00241(2) -0.74189(6) Uani 0.0195(3) 4 0.524(11) d
.
. .
```

M3a1 Al 0.5 0.5 0.5 Uani 0.0189(4) 2 0.753(15) d . . .  
M3b1 Al 1 0 -0.5 Uani 0.0177(4) 2 0.685(15) d . . .  
M3a2 Ti 0.5 0.5 0.5 Uani 0.0189(4) 2 0.247(15) d . . .  
M3b2 Ti 1 0 -0.5 Uani 0.0177(4) 2 0.315(15) d . . .  
P2a P 0.58641(7) 0.58909(3) 0.29617(6) Uani 0.01632(19) 4 1 d . . .  
P2b P 1.08598(7) -0.08934(3) -0.29820(6) Uani 0.01636(19) 4 1 d . . .  
P1a P 0.90775(7) 0.59363(3) 0.80206(6) Uani 0.01613(19) 4 1 d . . .  
P1b P 1.40876(7) -0.09344(3) -0.80349(6) Uani 0.01669(19) 4 1 d . . .  
K1 K 0.7162(2) 0.85199(9) 0.06147(17) Uani 0.0314(7) 4 0.130(7) d . . .  
Ow1 O 0.7162(2) 0.85199(9) 0.06147(17) Uani 0.0314(7) 4 0.770(7) d . . .  
. .  
K2 K 1.22167(8) -0.35426(3) -0.05779(6) Uani 0.0219(2) 4 0.887(6) d . . .  
. .  
Ow2 O 1.22167(8) -0.35426(3) -0.05779(6) Uani 0.0219(2) 4 0.013(6) d . . .  
. .  
X1 O 0.6388(2) 0.50205(7) 0.59864(17) Uani 0.0143(5) 4 1 d . . .  
X2 O 1.1409(2) -0.00368(7) -0.59740(17) Uani 0.0142(5) 4 1 d . . .  
O1a O 0.9045(2) 0.66779(9) 0.80680(17) Uani 0.0209(6) 4 1 d . . .  
O1b O 1.4032(2) -0.16787(9) -0.80667(17) Uani 0.0215(6) 4 1 d . . .  
O2a O 1.0278(2) 0.57085(9) 0.73901(16) Uani 0.0183(5) 4 1 d . . .  
O2b O 1.5279(2) -0.07012(9) -0.73874(16) Uani 0.0176(5) 4 1 d . . .  
O3a O 0.90910(20) 0.56544(9) 0.91916(15) Uani 0.0175(5) 4 1 d . . .  
O3b O 1.4116(2) -0.06628(9) -0.92072(16) Uani 0.0180(5) 4 1 d . . .  
O4a O 0.7852(2) 0.57029(9) 0.74298(16) Uani 0.0184(5) 4 1 d . . .  
O4b O 1.2858(2) -0.06974(9) -0.74594(16) Uani 0.0189(5) 4 1 d . . .  
O5a O 0.5946(2) 0.66330(9) 0.29278(18) Uani 0.0214(6) 4 1 d . . .  
O5b O 1.0936(2) -0.16354(9) -0.29346(17) Uani 0.0206(5) 4 1 d . . .  
O6a O 0.4653(2) 0.56582(9) 0.23539(16) Uani 0.0173(5) 4 1 d . . .  
O6b O 0.9660(2) -0.06573(9) -0.23735(16) Uani 0.0189(5) 4 1 d . . .  
O7a O 0.5855(2) 0.56526(9) 0.41524(16) Uani 0.0180(5) 4 1 d . . .  
O7b O 1.0828(2) -0.06647(9) -0.41819(15) Uani 0.0177(5) 4 1 d . . .  
O8a O 0.7081(2) 0.56246(9) 0.23852(16) Uani 0.0193(5) 4 1 d . . .  
O8b O 1.2079(2) -0.06239(9) -0.24172(16) Uani 0.0192(5) 4 1 d . . .  
O9a O 0.3451(2) 0.68455(10) 0.17428(18) Uani 0.0228(6) 4 1 d . . .  
O9b O 0.8464(2) -0.18755(10) -0.1744(2) Uani 0.0283(6) 4 1 d . . .  
O10a O 0.5778(2) 0.74255(10) 0.07856(18) Uani 0.0225(6) 4 1 d . . .  
O10b O 1.0857(2) -0.24137(10) -0.07489(18) Uani 0.0225(6) 4 1 d . . .  
O11a O 0.6428(2) 0.80796(10) 0.31795(18) Uani 0.0226(6) 4 1 d . . .  
O11b O 1.1473(2) -0.30809(10) -0.3057(2) Uani 0.0275(6) 4 1 d . . .  
O12a O 0.3979(2) 0.75123(10) 0.40594(18) Uani 0.0236(6) 4 1 d . . .  
O12b O 0.9027(2) -0.25309(10) -0.40946(18) Uani 0.0236(6) 4 1 d . . .  
O13a O 0.6655(2) 0.50409(8) 0.9115(2) Uani 0.0212(6) 4 1 d . . .  
O13b O 1.1632(3) -0.00056(8) -0.9124(2) Uani 0.0245(7) 4 1 d . . .  
O14a O 0.2586(2) 0.63984(10) 0.44014(17) Uani 0.0255(6) 4 1 d . . .  
O14b O 0.7592(2) -0.14199(10) -0.43957(17) Uani 0.0241(6) 4 1 d . . .  
O15a O 0.5418(2) 0.41004(11) 1.0177(2) Uani 0.0292(7) 4 1 d . . .  
O15b O 1.0197(3) 0.09405(13) -1.00606(18) Uani 0.0335(8) 4 1 d . . .  
H9a1 H 0.263(2) 0.6824(19) 0.183(4) Uiso 0.049(3) 4 1 d . . .  
H9a2 H 0.379(3) 0.6486(15) 0.191(4) Uiso 0.049(3) 4 1 d . . .  
H9b1 H 0.769(3) -0.188(3) -0.199(4) Uiso 0.049(3) 4 1 d . . .  
H10a2 H 0.621(4) 0.7119(18) 0.052(4) Uiso 0.049(3) 4 1 d . . .  
H10b1 H 1.018(3) -0.2505(19) -0.042(3) Uiso 0.049(3) 4 1 d . . .  
H10b2 H 1.122(4) -0.2087(17) -0.044(3) Uiso 0.049(3) 4 1 d . . .  
H11a1 H 0.721(2) 0.804(2) 0.320(4) Uiso 0.049(3) 4 1 d . . .  
H11a2 H 0.624(4) 0.8446(15) 0.292(4) Uiso 0.049(3) 4 1 d . . .  
H11b1 H 1.232(2) -0.3136(19) -0.302(4) Uiso 0.049(3) 4 1 d . . .  
H11b2 H 1.111(3) -0.3442(14) -0.301(4) Uiso 0.049(3) 4 1 d . . .  
H12a1 H 0.467(3) 0.7468(17) 0.439(4) Uiso 0.049(3) 4 1 d . . .

H12a2 H 0.359(4) 0.7142(14) 0.403(4) Uiso 0.049(3) 4 1 d . . .  
 H12b1 H 0.856(4) -0.2208(17) -0.415(4) Uiso 0.049(3) 4 1 d . . .  
 H13a1 H 0.627(4) 0.4714(18) 0.938(3) Uiso 0.049(3) 4 1 d . . .  
 H13a2 H 0.737(3) 0.5089(18) 0.944(4) Uiso 0.049(3) 4 1 d . . .  
 H13b1 H 1.223(4) 0.0022(18) -0.960(3) Uiso 0.049(3) 4 1 d . . .  
 H13b2 H 1.097(3) 0.019(2) -0.936(3) Uiso 0.049(3) 4 1 d . . .  
 H14a1 H 0.310(4) 0.6195(19) 0.483(3) Uiso 0.049(3) 4 1 d . . .  
 H14a2 H 0.245(4) 0.6179(17) 0.386(3) Uiso 0.049(3) 4 1 d . . .  
 H14b1 H 0.751(4) -0.1178(16) -0.385(2) Uiso 0.049(3) 4 1 d . . .  
 H14b2 H 0.796(4) -0.1202(17) -0.492(3) Uiso 0.049(3) 4 1 d . . .  
 H15a1 H 0.468(3) 0.405(3) 0.987(4) Uiso 0.049(3) 4 1 d . . .  
 H15b1 H 0.948(3) 0.089(2) -0.976(3) Uiso 0.049(3) 4 1 d . . .  
 H15b2 H 1.018(3) 0.078(2) -1.070(2) Uiso 0.049(3) 4 1 d . . .  
 Ha1a H 0.685(5) 0.877(2) 0.014(4) Uiso 0.059(14) 4 1 d . . .

loop\_

\_atom\_site\_aniso\_label  
 \_atom\_site\_aniso\_type\_symbol  
 \_atom\_site\_aniso\_U\_11  
 \_atom\_site\_aniso\_U\_22  
 \_atom\_site\_aniso\_U\_33  
 \_atom\_site\_aniso\_U\_12  
 \_atom\_site\_aniso\_U\_13  
 \_atom\_site\_aniso\_U\_23  
 M1a1 Mn 0.0214(3) 0.0096(2) 0.0212(3) 0.00151(15) 0.00041(17)  
 0.00117(14)  
 M1b1 Mn 0.0220(3) 0.0100(2) 0.0232(3) -0.00056(15) 0.00029(17)  
 0.00246(14)  
 M1a2 Mg 0.0214(3) 0.0096(2) 0.0212(3) 0.00151(15) 0.00041(17)  
 0.00117(14)  
 M1b2 Mg 0.0220(3) 0.0100(2) 0.0232(3) -0.00056(15) 0.00029(17)  
 0.00246(14)  
 M2a1 Al 0.0190(5) 0.0090(4) 0.0295(5) -0.00007(18) -0.0012(3) -  
 0.00008(18)  
 M2b1 Al 0.0212(5) 0.0090(4) 0.0283(4) -0.00042(17) 0.0014(3) -  
 0.00075(17)  
 M2a2 Ti 0.0190(5) 0.0090(4) 0.0295(5) -0.00007(18) -0.0012(3) -  
 0.00008(18)  
 M2b2 Ti 0.0212(5) 0.0090(4) 0.0283(4) -0.00042(17) 0.0014(3) -  
 0.00075(17)  
 M3a1 Al 0.0255(8) 0.0110(6) 0.0200(6) 0.0000(3) 0.0024(4) 0.0001(3)  
 M3b1 Al 0.0242(7) 0.0104(5) 0.0185(6) -0.0003(3) -0.0011(4) -0.0001(3)  
 M3a2 Ti 0.0255(8) 0.0110(6) 0.0200(6) 0.0000(3) 0.0024(4) 0.0001(3)  
 M3b2 Ti 0.0242(7) 0.0104(5) 0.0185(6) -0.0003(3) -0.0011(4) -0.0001(3)  
 P2a P 0.0208(4) 0.0089(3) 0.0192(3) -0.0001(2) 0.0000(2) 0.0010(2)  
 P2b P 0.0214(4) 0.0090(3) 0.0187(3) 0.0001(2) 0.0004(2) 0.0019(2)  
 P1a P 0.0211(4) 0.0092(3) 0.0181(3) -0.0001(2) 0.0007(2) 0.0016(2)  
 P1b P 0.0213(4) 0.0094(3) 0.0193(3) -0.0002(2) -0.0001(2) 0.0012(2)  
 K1 K 0.0476(15) 0.0153(10) 0.0314(12) 0.0043(7) -0.0027(8) -0.0014(6)  
 Ow1 O 0.0476(15) 0.0153(10) 0.0314(12) 0.0043(7) -0.0027(8) -0.0014(6)  
 K2 K 0.0279(4) 0.0139(3) 0.0238(4) -0.0003(2) 0.0026(2) 0.0018(2)  
 Ow2 O 0.0279(4) 0.0139(3) 0.0238(4) -0.0003(2) 0.0026(2) 0.0018(2)  
 X1 O 0.0209(11) 0.0074(8) 0.0147(9) -0.0004(5) -0.0001(7) -0.0002(5)  
 X2 O 0.0174(11) 0.0116(8) 0.0135(9) 0.0005(5) 0.0013(7) 0.0007(5)  
 O1a O 0.0262(11) 0.0112(8) 0.0254(10) -0.0010(7) 0.0019(7) 0.0009(7)  
 O1b O 0.0240(11) 0.0123(8) 0.0281(10) -0.0010(7) -0.0020(8) -0.0007(7)  
 O2a O 0.0207(10) 0.0141(8) 0.0202(9) 0.0012(7) 0.0032(7) 0.0001(7)  
 O2b O 0.0198(10) 0.0147(8) 0.0182(9) -0.0007(7) -0.0004(7) -0.0020(6)

O3a O 0.0228(11) 0.0134(8) 0.0162(8) -0.0002(6) 0.0001(7) 0.0006(6)  
 O3b O 0.0238(11) 0.0121(8) 0.0181(8) -0.0012(7) -0.0012(7) 0.0010(6)  
 O4a O 0.0242(11) 0.0116(8) 0.0194(9) 0.0011(7) -0.0009(7) 0.0011(6)  
 O4b O 0.0217(10) 0.0125(8) 0.0225(9) -0.0004(7) 0.0023(7) 0.0002(6)  
 O5a O 0.0226(11) 0.0108(8) 0.0307(10) -0.0009(7) -0.0003(8) -0.0001(7)  
 O5b O 0.0234(11) 0.0110(8) 0.0273(10) -0.0005(7) 0.0016(7) 0.0030(7)  
 O6a O 0.0206(10) 0.0111(8) 0.0203(9) -0.0013(6) -0.0001(7) -0.0002(6)  
 O6b O 0.0213(11) 0.0155(8) 0.0199(9) 0.0031(7) 0.0029(7) 0.0007(7)  
 O7a O 0.0241(11) 0.0129(8) 0.0169(8) -0.0002(7) -0.0011(7) 0.0018(6)  
 O7b O 0.0234(11) 0.0138(8) 0.0158(8) 0.0007(6) -0.0004(7) 0.0008(6)  
 O8a O 0.0248(11) 0.0118(8) 0.0215(9) 0.0012(7) 0.0039(7) 0.0013(6)  
 O8b O 0.0255(11) 0.0129(8) 0.0191(9) -0.0011(7) -0.0011(7) 0.0015(6)  
 O9a O 0.0240(11) 0.0169(9) 0.0276(10) 0.0023(7) 0.0009(8) 0.0014(7)  
 O9b O 0.0256(12) 0.0179(9) 0.0415(12) 0.0021(8) -0.0017(9) -0.0032(8)  
 O10a O 0.0272(11) 0.0156(9) 0.0248(10) 0.0011(7) 0.0020(8) 0.0004(7)  
 O10b O 0.0263(11) 0.0159(9) 0.0252(10) -0.0024(7) 0.0012(8) 0.0022(7)  
 O11a O 0.0245(11) 0.0136(8) 0.0297(10) 0.0009(7) -0.0011(8) 0.0013(7)  
 O11b O 0.0286(12) 0.0142(9) 0.0399(12) -0.0003(7) 0.0016(9) 0.0025(8)  
 O12a O 0.0287(12) 0.0171(9) 0.0248(10) 0.0019(7) 0.0002(8) -0.0003(7)  
 O12b O 0.0281(12) 0.0160(8) 0.0267(10) -0.0003(7) 0.0000(8) 0.0025(7)  
 O13a O 0.0200(12) 0.0186(10) 0.0248(11) -0.0016(6) -0.0011(8) 0.0007(6)  
 O13b O 0.0264(14) 0.0224(11) 0.0247(12) 0.0016(7) 0.0002(9) -0.0003(6)  
 O14a O 0.0397(14) 0.0176(9) 0.0191(9) 0.0075(8) -0.0051(8) -0.0031(7)  
 O14b O 0.0387(13) 0.0148(8) 0.0189(9) -0.0060(7) 0.0042(8) -0.0006(7)  
 O15a O 0.0378(13) 0.0231(10) 0.0268(10) 0.0029(9) 0.0057(9) 0.0029(8)  
 O15b O 0.0467(15) 0.0266(12) 0.0270(12) -0.0029(10) -0.0094(10)  
 0.0008(8)

loop\_  
 \_jana\_atom\_site\_ADp\_C\_label  
 \_jana\_atom\_site\_ADp\_C\_type\_symbol  
 \_jana\_atom\_site\_ADp\_C\_111  
 \_jana\_atom\_site\_ADp\_C\_112  
 \_jana\_atom\_site\_ADp\_C\_113  
 \_jana\_atom\_site\_ADp\_C\_122  
 \_jana\_atom\_site\_ADp\_C\_123  
 \_jana\_atom\_site\_ADp\_C\_133  
 \_jana\_atom\_site\_ADp\_C\_222  
 \_jana\_atom\_site\_ADp\_C\_223  
 \_jana\_atom\_site\_ADp\_C\_233  
 \_jana\_atom\_site\_ADp\_C\_333  
 ? ? ? ? ? ? ? ? ? ? ? ?

loop\_  
 \_jana\_atom\_site\_ADp\_D\_label  
 \_jana\_atom\_site\_ADp\_D\_type\_symbol  
 \_jana\_atom\_site\_ADp\_D\_1111  
 \_jana\_atom\_site\_ADp\_D\_1112  
 \_jana\_atom\_site\_ADp\_D\_1113  
 \_jana\_atom\_site\_ADp\_D\_1122  
 \_jana\_atom\_site\_ADp\_D\_1123  
 \_jana\_atom\_site\_ADp\_D\_1133  
 \_jana\_atom\_site\_ADp\_D\_1222  
 \_jana\_atom\_site\_ADp\_D\_1223  
 \_jana\_atom\_site\_ADp\_D\_1233  
 \_jana\_atom\_site\_ADp\_D\_1333  
 \_jana\_atom\_site\_ADp\_D\_2222  
 \_jana\_atom\_site\_ADp\_D\_2223

\_jana\_atom\_site\_ADP\_D\_2233  
\_jana\_atom\_site\_ADP\_D\_2333  
\_jana\_atom\_site\_ADP\_D\_3333  
? ? ? ? ? ? ? ? ? ? ? ? ? ? ? ?

loop\_

\_jana\_atom\_site\_ADP\_E\_label  
\_jana\_atom\_site\_ADP\_E\_type\_symbol  
\_jana\_atom\_site\_ADP\_E\_11111  
\_jana\_atom\_site\_ADP\_E\_11112  
\_jana\_atom\_site\_ADP\_E\_11113  
\_jana\_atom\_site\_ADP\_E\_11122  
\_jana\_atom\_site\_ADP\_E\_11123  
\_jana\_atom\_site\_ADP\_E\_11133  
\_jana\_atom\_site\_ADP\_E\_11222  
\_jana\_atom\_site\_ADP\_E\_11223  
\_jana\_atom\_site\_ADP\_E\_11233  
\_jana\_atom\_site\_ADP\_E\_11333  
\_jana\_atom\_site\_ADP\_E\_12222  
\_jana\_atom\_site\_ADP\_E\_12223  
\_jana\_atom\_site\_ADP\_E\_12233  
\_jana\_atom\_site\_ADP\_E\_12333  
\_jana\_atom\_site\_ADP\_E\_13333  
\_jana\_atom\_site\_ADP\_E\_22222  
\_jana\_atom\_site\_ADP\_E\_22223  
\_jana\_atom\_site\_ADP\_E\_22233  
\_jana\_atom\_site\_ADP\_E\_22333  
\_jana\_atom\_site\_ADP\_E\_23333  
\_jana\_atom\_site\_ADP\_E\_33333  
? ? ? ? ? ? ? ? ? ? ? ? ? ? ? ?

loop\_

\_jana\_atom\_site\_ADP\_F\_label  
\_jana\_atom\_site\_ADP\_F\_type\_symbol  
\_jana\_atom\_site\_ADP\_F\_111111  
\_jana\_atom\_site\_ADP\_F\_111112  
\_jana\_atom\_site\_ADP\_F\_111113  
\_jana\_atom\_site\_ADP\_F\_111122  
\_jana\_atom\_site\_ADP\_F\_111123  
\_jana\_atom\_site\_ADP\_F\_111133  
\_jana\_atom\_site\_ADP\_F\_111222  
\_jana\_atom\_site\_ADP\_F\_111223  
\_jana\_atom\_site\_ADP\_F\_111233  
\_jana\_atom\_site\_ADP\_F\_111333  
\_jana\_atom\_site\_ADP\_F\_112222  
\_jana\_atom\_site\_ADP\_F\_112223  
\_jana\_atom\_site\_ADP\_F\_112233  
\_jana\_atom\_site\_ADP\_F\_112333  
\_jana\_atom\_site\_ADP\_F\_113333  
\_jana\_atom\_site\_ADP\_F\_122222  
\_jana\_atom\_site\_ADP\_F\_122223  
\_jana\_atom\_site\_ADP\_F\_122233  
\_jana\_atom\_site\_ADP\_F\_122333  
\_jana\_atom\_site\_ADP\_F\_123333  
\_jana\_atom\_site\_ADP\_F\_133333  
\_jana\_atom\_site\_ADP\_F\_222222  
\_jana\_atom\_site\_ADP\_F\_222223  
\_jana\_atom\_site\_ADP\_F\_222233

\_jana\_atom\_site\_ADP\_F\_222333  
\_jana\_atom\_site\_ADP\_F\_223333  
\_jana\_atom\_site\_ADP\_F\_233333  
\_jana\_atom\_site\_ADP\_F\_333333  
? ? ? ? ? ? ? ? ? ? ? ? ? ? ? ? ? ? ? ? ? ? ? ? ? ? ? ? ? ? ? ? ? ? ?

#=====

# 10. MOLECULAR GEOMETRY

loop\_  
\_geom\_bond\_atom\_site\_label\_1  
\_geom\_bond\_atom\_site\_label\_2  
\_geom\_bond\_site\_symmetry\_1  
\_geom\_bond\_site\_symmetry\_2  
\_geom\_bond\_distance  
\_geom\_bond\_publ\_flag  
M1a1 M1a2 . . 0 ?  
M1a1 O1b . 1\_466 2.084(2) ?  
M1a1 O5a . . 2.088(2) ?  
M1a1 O9a . . 2.182(2) ?  
M1a1 O10a . . 2.220(2) ?  
M1a1 O11a . . 2.176(2) ?  
M1a1 O12a . . 2.209(2) ?  
M1a1 H9a2 . . 2.43(3) ?  
M1a1 H11a2 . . 2.49(3) ?  
M1a1 H12a1 . . 2.38(5) ?  
M1a1 H12a2 . . 2.48(4) ?  
M1b1 M1b2 . . 0 ?  
M1b1 O1a . 1\_544 2.086(2) ?  
M1b1 O5b . . 2.084(2) ?  
M1b1 O9b . . 2.151(2) ?  
M1b1 O10b . . 2.237(2) ?  
M1b1 O11b . . 2.158(2) ?  
M1b1 O12b . . 2.257(2) ?  
M1b1 H10b1 . . 2.46(4) ?  
M1b1 H11b2 . . 2.44(3) ?  
M1a2 O1b . 1\_466 2.084(2) ?  
M1a2 O5a . . 2.088(2) ?  
M1a2 O9a . . 2.182(2) ?  
M1a2 O10a . . 2.220(2) ?  
M1a2 O11a . . 2.176(2) ?  
M1a2 O12a . . 2.209(2) ?  
M1a2 H9a2 . . 2.43(3) ?  
M1a2 H11a2 . . 2.49(3) ?  
M1a2 H12a1 . . 2.38(5) ?  
M1a2 H12a2 . . 2.48(4) ?  
M1b2 O1a . 1\_544 2.086(2) ?  
M1b2 O5b . . 2.084(2) ?  
M1b2 O9b . . 2.151(2) ?  
M1b2 O10b . . 2.237(2) ?  
M1b2 O11b . . 2.158(2) ?  
M1b2 O12b . . 2.257(2) ?  
M1b2 H10b1 . . 2.46(4) ?  
M1b2 H11b2 . . 2.44(3) ?  
M2a1 M2a2 . . 0 ?

M2a1 X1 . . 1.778(2) ?  
M2a1 O2b . 4\_456 1.965(2) ?  
M2a1 O4a . . 1.908(2) ?  
M2a1 O6a . 3\_666 1.931(2) ?  
M2a1 O8b . 2\_755 1.914(2) ?  
M2a1 O13a . . 2.049(3) ?  
M2a1 H13a1 . . 2.48(4) ?  
M2b1 M2b2 . . 0 ?  
M2b1 X2 . . 1.775(2) ?  
M2b1 O2a . 4\_553 1.979(2) ?  
M2b1 O4b . . 1.902(2) ?  
M2b1 O6b . 3\_754 1.934(2) ?  
M2b1 O8a . 2\_744 1.911(2) ?  
M2b1 O13b . . 2.079(3) ?  
M2b1 H13b2 . . 2.49(4) ?  
M2a2 X1 . . 1.778(2) ?  
M2a2 O2b . 4\_456 1.965(2) ?  
M2a2 O4a . . 1.908(2) ?  
M2a2 O6a . 3\_666 1.931(2) ?  
M2a2 O8b . 2\_755 1.914(2) ?  
M2a2 O13a . . 2.049(3) ?  
M2a2 H13a1 . . 2.48(4) ?  
M2b2 X2 . . 1.775(2) ?  
M2b2 O2a . 4\_553 1.979(2) ?  
M2b2 O4b . . 1.902(2) ?  
M2b2 O6b . 3\_754 1.934(2) ?  
M2b2 O8a . 2\_744 1.911(2) ?  
M2b2 O13b . . 2.079(3) ?  
M2b2 H13b2 . . 2.49(4) ?  
M3a1 M3a2 . . 0 ?  
M3a1 X1 . . 1.873(2) ?  
M3a1 X1 . 3\_666 1.873(2) ?  
M3a1 O3b . 2\_754 1.9090(19) ?  
M3a1 O3b . 4\_456 1.9090(19) ?  
M3a1 O7a . . 1.9149(19) ?  
M3a1 O7a . 3\_666 1.9149(19) ?  
M3b1 M3b2 . . 0 ?  
M3b1 X2 . . 1.895(2) ?  
M3b1 X2 . 3\_754 1.895(2) ?  
M3b1 O3a . 2\_745 1.9114(19) ?  
M3b1 O3a . 4\_553 1.9114(19) ?  
M3b1 O7b . . 1.8931(19) ?  
M3b1 O7b . 3\_754 1.8931(19) ?  
M3a2 X1 . . 1.873(2) ?  
M3a2 X1 . 3\_666 1.873(2) ?  
M3a2 O3b . 2\_754 1.9090(19) ?  
M3a2 O3b . 4\_456 1.9090(19) ?  
M3a2 O7a . . 1.9149(19) ?  
M3a2 O7a . 3\_666 1.9149(19) ?  
M3b2 X2 . . 1.895(2) ?  
M3b2 X2 . 3\_754 1.895(2) ?  
M3b2 O3a . 2\_745 1.9114(19) ?  
M3b2 O3a . 4\_553 1.9114(19) ?  
M3b2 O7b . . 1.8931(19) ?  
M3b2 O7b . 3\_754 1.8931(19) ?  
P2a O5a . . 1.525(2) ?  
P2a O6a . . 1.533(2) ?  
P2a O7a . . 1.532(2) ?



P2a O8a . . 1.553(2) ?  
P2b O5b . . 1.525(2) ?  
P2b O6b . . 1.536(2) ?  
P2b O7b . . 1.537(2) ?  
P2b O8b . . 1.542(2) ?  
P1a O1a . . 1.5227(19) ?  
P1a O2a . . 1.545(2) ?  
P1a O3a . . 1.540(2) ?  
P1a O4a . . 1.536(2) ?  
P1b O1b . . 1.528(2) ?  
P1b O2b . . 1.541(2) ?  
P1b O3b . . 1.535(2) ?  
P1b O4b . . 1.543(2) ?  
K1 Ow1 . . 0 ?  
K1 Ha1a . . 0.84(5) ?  
Ow1 Ha1a . . 0.84(5) ?  
K2 Ow2 . . 0 ?  
X1 H13b1 . 2\_754 2.23(4) ?  
X2 H13a2 . 2\_745 2.27(4) ?  
O1a O4a . . 2.476(3) ?  
O1a H11a1 . 4\_565 2.01(3) ?  
O1b O4b . . 2.471(3) ?  
O1b H11b1 . 4\_544 1.82(3) ?  
O2a H11b2 . 1\_566 2.01(3) ?  
O2a H15b2 . 2\_754 2.12(3) ?  
O2b H11a2 . 1\_644 2.05(3) ?  
O3a O4a . . 2.498(3) ?  
O3a H13a2 . . 2.16(4) ?  
O3a H14b2 . 4\_556 1.96(4) ?  
O3b H13b1 . . 2.46(4) ?  
O3b H14a1 . 4\_653 1.92(4) ?  
O4a H11a2 . 4\_565 2.50(4) ?  
O5a O8a . . 2.475(3) ?  
O5a H9b1 . 4\_555 1.89(3) ?  
O5b O8b . . 2.471(3) ?  
O5b H9a1 . 4\_654 1.83(3) ?  
O6a H9a2 . . 1.99(3) ?  
O6a H13a1 . 3\_666 2.44(4) ?  
O6b H13b2 . 3\_754 2.41(4) ?  
O7a H13b1 . 2\_754 2.43(4) ?  
O7a Ha1a . 4\_565 1.97(5) ?  
O7b H13a2 . 2\_745 2.45(4) ?  
O8a H14b1 . 4\_555 1.94(3) ?  
O8b H14a2 . 4\_654 1.96(3) ?  
O9a H9a1 . . 0.86(3) ?  
O9a H9a2 . . 0.84(3) ?  
O9b H9b1 . . 0.85(3) ?  
O10a H10a2 . . 0.84(4) ?  
O10a H12a1 . 4\_564 2.06(4) ?  
O10b H10b1 . . 0.84(3) ?  
O10b H10b2 . . 0.86(4) ?  
O11a H11a1 . . 0.82(3) ?  
O11a H11a2 . . 0.83(3) ?  
O11b H11b1 . . 0.89(3) ?  
O11b H11b2 . . 0.83(3) ?  
O12a H12a1 . . 0.83(4) ?  
O12a H12a2 . . 0.86(3) ?  
O12b H10b1 . 4\_544 2.02(4) ?

O12b H12b1 . . 0.82(4) ?  
 O13a H13a1 . . 0.85(4) ?  
 O13a H13a2 . . 0.84(4) ?  
 O13b H13b1 . . 0.86(4) ?  
 O13b H13b2 . . 0.85(4) ?  
 O13b H15b2 . 3\_753 2.48(4) ?  
 O14a H10b2 . 4\_455 2.01(4) ?  
 O14a H12a2 . . 1.91(3) ?  
 O14a H14a1 . . 0.85(4) ?  
 O14a H14a2 . . 0.81(3) ?  
 O14a H15b1 . 2\_654 2.44(3) ?  
 O14b H10a2 . 4\_554 2.03(4) ?  
 O14b H12b1 . . 1.93(4) ?  
 O14b H14b1 . . 0.84(3) ?  
 O14b H14b2 . . 0.87(3) ?  
 O15a H13a1 . . 1.82(4) ?  
 O15a H15a1 . . 0.86(4) ?  
 O15b H13b2 . . 1.93(4) ?  
 O15b H15b1 . . 0.84(3) ?  
 O15b H15b2 . . 0.84(3) ?  
 H9a1 H9a2 . . 1.39(5) ?  
 H9b1 H11a1 . 4\_554 2.44(6) ?  
 H10a2 H12a1 . 4\_564 2.27(6) ?  
 H10a2 H12b1 . 4\_555 2.48(6) ?  
 H10a2 H14b1 . 4\_555 2.48(5) ?  
 H10b1 H10b2 . . 1.38(5) ?  
 H10b1 H12b1 . 4\_545 2.37(6) ?  
 H10b2 H14a2 . 4\_654 2.42(5) ?  
 H11a1 H11a2 . . 1.35(5) ?  
 H11b1 H11b2 . . 1.41(4) ?  
 H12a1 H12a2 . . 1.38(5) ?  
 H12a2 H14a1 . . 2.24(5) ?  
 H12a2 H14a2 . . 2.31(5) ?  
 H12b1 H14b1 . . 2.41(5) ?  
 H12b1 H14b2 . . 2.35(5) ?  
 H13a1 H13a2 . . 1.38(5) ?  
 H13a1 H15a1 . . 2.22(6) ?  
 H13a2 H14b2 . 4\_556 2.49(5) ?  
 H13b1 H13b2 . . 1.39(5) ?  
 H13b2 H15b1 . . 2.16(6) ?  
 H13b2 H15b1 . 3\_753 2.50(7) ?  
 H13b2 H15b2 . . 2.20(6) ?  
 H13b2 H15b2 . 3\_753 2.33(6) ?  
 H14a1 H14a2 . . 1.36(5) ?  
 H14a2 H15b1 . 2\_654 2.39(5) ?  
 H14b1 H14b2 . . 1.40(5) ?  
 H15b1 H15b2 . . 1.37(5) ?

loop\_

\_geom\_angle\_atom\_site\_label\_1  
 \_geom\_angle\_atom\_site\_label\_2  
 \_geom\_angle\_atom\_site\_label\_3  
 \_geom\_angle\_site\_symmetry\_1  
 \_geom\_angle\_site\_symmetry\_2  
 \_geom\_angle\_site\_symmetry\_3  
 \_geom\_angle  
 \_geom\_angle\_publ\_flag  
 M1a2 M1a1 O1b . . 1\_466 0 ?

M1a2 M1a1 O5a . . . 0 ?  
M1a2 M1a1 O9a . . . 0 ?  
M1a2 M1a1 O10a . . . 0 ?  
M1a2 M1a1 O11a . . . 0 ?  
M1a2 M1a1 O12a . . . 0 ?  
M1a2 M1a1 H9a2 . . . 0 ?  
M1a2 M1a1 H11a2 . . . 0 ?  
M1a2 M1a1 H12a1 . . . 0 ?  
M1a2 M1a1 H12a2 . . . 0 ?  
O1b M1a1 O5a 1\_466 . . 176.65(9) ?  
O1b M1a1 O9a 1\_466 . . 93.03(8) ?  
O1b M1a1 O10a 1\_466 . . 86.31(8) ?  
O1b M1a1 O11a 1\_466 . . 87.67(8) ?  
O1b M1a1 O12a 1\_466 . . 91.61(8) ?  
O1b M1a1 H9a2 1\_466 . . 113.1(9) ?  
O1b M1a1 H11a2 1\_466 . . 68.8(9) ?  
O1b M1a1 H12a1 1\_466 . . 104.2(8) ?  
O1b M1a1 H12a2 1\_466 . . 101.8(7) ?  
O5a M1a1 O9a . . . 88.98(8) ?  
O5a M1a1 O10a . . . 91.24(8) ?  
O5a M1a1 O11a . . . 90.35(8) ?  
O5a M1a1 O12a . . . 90.96(8) ?  
O5a M1a1 H9a2 . . . 68.9(9) ?  
O5a M1a1 H11a2 . . . 109.0(9) ?  
O5a M1a1 H12a1 . . . 77.7(8) ?  
O5a M1a1 H12a2 . . . 81.3(7) ?  
O9a M1a1 O10a . . . 84.07(8) ?  
O9a M1a1 O11a . . . 179.17(8) ?  
O9a M1a1 O12a . . . 92.91(8) ?  
O9a M1a1 H9a2 . . . 20.1(9) ?  
O9a M1a1 H11a2 . . . 161.6(9) ?  
O9a M1a1 H12a1 . . . 107.7(8) ?  
O9a M1a1 H12a2 . . . 75.1(9) ?  
O10a M1a1 O11a . . . 96.44(8) ?  
O10a M1a1 O12a . . . 176.22(8) ?  
O10a M1a1 H9a2 . . . 85.2(12) ?  
O10a M1a1 H11a2 . . . 91.5(11) ?  
O10a M1a1 H12a1 . . . 163.4(8) ?  
O10a M1a1 H12a2 . . . 157.9(8) ?  
O11a M1a1 O12a . . . 86.61(8) ?  
O11a M1a1 H9a2 . . . 159.3(9) ?  
O11a M1a1 H11a2 . . . 19.2(9) ?  
O11a M1a1 H12a1 . . . 71.6(8) ?  
O11a M1a1 H12a2 . . . 104.3(9) ?  
O12a M1a1 H9a2 . . . 92.7(11) ?  
O12a M1a1 H11a2 . . . 90.7(11) ?  
O12a M1a1 H12a1 . . . 20.3(8) ?  
O12a M1a1 H12a2 . . . 20.2(8) ?  
H9a2 M1a1 H11a2 . . . 176.0(14) ?  
H9a2 M1a1 H12a1 . . . 101.9(14) ?  
H9a2 M1a1 H12a2 . . . 72.7(14) ?  
H11a2 M1a1 H12a1 . . . 80.7(14) ?  
H11a2 M1a1 H12a2 . . . 110.5(14) ?  
H12a1 M1a1 H12a2 . . . 32.9(12) ?  
M1b2 M1b1 O1a . . 1\_544 0 ?  
M1b2 M1b1 O5b . . . 0 ?  
M1b2 M1b1 O9b . . . 0 ?  
M1b2 M1b1 O10b . . . 0 ?

M1b2 M1b1 O11b . . . 0 ?  
M1b2 M1b1 O12b . . . 0 ?  
M1b2 M1b1 H10b1 . . . 0 ?  
M1b2 M1b1 H11b2 . . . 0 ?  
O1a M1b1 O5b 1\_544 . . 178.03(8) ?  
O1a M1b1 O9b 1\_544 . . 91.58(8) ?  
O1a M1b1 O10b 1\_544 . . 88.21(8) ?  
O1a M1b1 O11b 1\_544 . . 87.20(8) ?  
O1a M1b1 O12b 1\_544 . . 90.85(8) ?  
O1a M1b1 H10b1 1\_544 . . 74.2(9) ?  
O1a M1b1 H11b2 1\_544 . . 67.8(8) ?  
O5b M1b1 O9b . . . 90.38(8) ?  
O5b M1b1 O10b . . . 91.93(8) ?  
O5b M1b1 O11b . . . 90.83(8) ?  
O5b M1b1 O12b . . . 89.04(8) ?  
O5b M1b1 H10b1 . . . 106.4(9) ?  
O5b M1b1 H11b2 . . . 110.2(8) ?  
O9b M1b1 O10b . . . 85.30(9) ?  
O9b M1b1 O11b . . . 178.25(9) ?  
O9b M1b1 O12b . . . 93.93(9) ?  
O9b M1b1 H10b1 . . . 72.3(8) ?  
O9b M1b1 H11b2 . . . 159.2(8) ?  
O10b M1b1 O11b . . . 93.41(9) ?  
O10b M1b1 O12b . . . 178.77(8) ?  
O10b M1b1 H10b1 . . . 19.8(8) ?  
O10b M1b1 H11b2 . . . 96.3(11) ?  
O11b M1b1 O12b . . . 87.34(9) ?  
O11b M1b1 H10b1 . . . 106.2(8) ?  
O11b M1b1 H11b2 . . . 19.8(8) ?  
O12b M1b1 H10b1 . . . 159.0(8) ?  
O12b M1b1 H11b2 . . . 84.1(11) ?  
H10b1 M1b1 H11b2 . . . 103.1(14) ?  
M1a1 M1a2 O1b . . 1\_466 0 ?  
M1a1 M1a2 O5a . . . 0 ?  
M1a1 M1a2 O9a . . . 0 ?  
M1a1 M1a2 O10a . . . 0 ?  
M1a1 M1a2 O11a . . . 0 ?  
M1a1 M1a2 O12a . . . 0 ?  
M1a1 M1a2 H9a2 . . . 0 ?  
M1a1 M1a2 H11a2 . . . 0 ?  
M1a1 M1a2 H12a1 . . . 0 ?  
M1a1 M1a2 H12a2 . . . 0 ?  
O1b M1a2 O5a 1\_466 . . 176.65(9) ?  
O1b M1a2 O9a 1\_466 . . 93.03(8) ?  
O1b M1a2 O10a 1\_466 . . 86.31(8) ?  
O1b M1a2 O11a 1\_466 . . 87.67(8) ?  
O1b M1a2 O12a 1\_466 . . 91.61(8) ?  
O1b M1a2 H9a2 1\_466 . . 113.1(9) ?  
O1b M1a2 H11a2 1\_466 . . 68.8(9) ?  
O1b M1a2 H12a1 1\_466 . . 104.2(8) ?  
O1b M1a2 H12a2 1\_466 . . 101.8(7) ?  
O5a M1a2 O9a . . . 88.98(8) ?  
O5a M1a2 O10a . . . 91.24(8) ?  
O5a M1a2 O11a . . . 90.35(8) ?  
O5a M1a2 O12a . . . 90.96(8) ?  
O5a M1a2 H9a2 . . . 68.9(9) ?  
O5a M1a2 H11a2 . . . 109.0(9) ?  
O5a M1a2 H12a1 . . . 77.7(8) ?

O5a M1a2 H12a2 . . . 81.3(7) ?  
 O9a M1a2 O10a . . . 84.07(8) ?  
 O9a M1a2 O11a . . . 179.17(8) ?  
 O9a M1a2 O12a . . . 92.91(8) ?  
 O9a M1a2 H9a2 . . . 20.1(9) ?  
 O9a M1a2 H11a2 . . . 161.6(9) ?  
 O9a M1a2 H12a1 . . . 107.7(8) ?  
 O9a M1a2 H12a2 . . . 75.1(9) ?  
 O10a M1a2 O11a . . . 96.44(8) ?  
 O10a M1a2 O12a . . . 176.22(8) ?  
 O10a M1a2 H9a2 . . . 85.2(12) ?  
 O10a M1a2 H11a2 . . . 91.5(11) ?  
 O10a M1a2 H12a1 . . . 163.4(8) ?  
 O10a M1a2 H12a2 . . . 157.9(8) ?  
 O11a M1a2 O12a . . . 86.61(8) ?  
 O11a M1a2 H9a2 . . . 159.3(9) ?  
 O11a M1a2 H11a2 . . . 19.2(9) ?  
 O11a M1a2 H12a1 . . . 71.6(8) ?  
 O11a M1a2 H12a2 . . . 104.3(9) ?  
 O12a M1a2 H9a2 . . . 92.7(11) ?  
 O12a M1a2 H11a2 . . . 90.7(11) ?  
 O12a M1a2 H12a1 . . . 20.3(8) ?  
 O12a M1a2 H12a2 . . . 20.2(8) ?  
 H9a2 M1a2 H11a2 . . . 176.0(14) ?  
 H9a2 M1a2 H12a1 . . . 101.9(14) ?  
 H9a2 M1a2 H12a2 . . . 72.7(14) ?  
 H11a2 M1a2 H12a1 . . . 80.7(14) ?  
 H11a2 M1a2 H12a2 . . . 110.5(14) ?  
 H12a1 M1a2 H12a2 . . . 32.9(12) ?  
 M1b1 M1b2 O1a . . 1\_544 0 ?  
 M1b1 M1b2 O5b . . . 0 ?  
 M1b1 M1b2 O9b . . . 0 ?  
 M1b1 M1b2 O10b . . . 0 ?  
 M1b1 M1b2 O11b . . . 0 ?  
 M1b1 M1b2 O12b . . . 0 ?  
 M1b1 M1b2 H10b1 . . . 0 ?  
 M1b1 M1b2 H11b2 . . . 0 ?  
 O1a M1b2 O5b 1\_544 . . 178.03(8) ?  
 O1a M1b2 O9b 1\_544 . . 91.58(8) ?  
 O1a M1b2 O10b 1\_544 . . 88.21(8) ?  
 O1a M1b2 O11b 1\_544 . . 87.20(8) ?  
 O1a M1b2 O12b 1\_544 . . 90.85(8) ?  
 O1a M1b2 H10b1 1\_544 . . 74.2(9) ?  
 O1a M1b2 H11b2 1\_544 . . 67.8(8) ?  
 O5b M1b2 O9b . . . 90.38(8) ?  
 O5b M1b2 O10b . . . 91.93(8) ?  
 O5b M1b2 O11b . . . 90.83(8) ?  
 O5b M1b2 O12b . . . 89.04(8) ?  
 O5b M1b2 H10b1 . . . 106.4(9) ?  
 O5b M1b2 H11b2 . . . 110.2(8) ?  
 O9b M1b2 O10b . . . 85.30(9) ?  
 O9b M1b2 O11b . . . 178.25(9) ?  
 O9b M1b2 O12b . . . 93.93(9) ?  
 O9b M1b2 H10b1 . . . 72.3(8) ?  
 O9b M1b2 H11b2 . . . 159.2(8) ?  
 O10b M1b2 O11b . . . 93.41(9) ?  
 O10b M1b2 O12b . . . 178.77(8) ?  
 O10b M1b2 H10b1 . . . 19.8(8) ?

O10b M1b2 H11b2 . . . 96.3(11) ?  
O11b M1b2 O12b . . . 87.34(9) ?  
O11b M1b2 H10b1 . . . 106.2(8) ?  
O11b M1b2 H11b2 . . . 19.8(8) ?  
O12b M1b2 H10b1 . . . 159.0(8) ?  
O12b M1b2 H11b2 . . . 84.1(11) ?  
H10b1 M1b2 H11b2 . . . 103.1(14) ?  
M2a2 M2a1 X1 . . . 0 ?  
M2a2 M2a1 O2b . . 4\_456 0 ?  
M2a2 M2a1 O4a . . . 0 ?  
M2a2 M2a1 O6a . . 3\_666 0 ?  
M2a2 M2a1 O8b . . 2\_755 0 ?  
M2a2 M2a1 O13a . . . 0 ?  
M2a2 M2a1 H13a1 . . . 0 ?  
X1 M2a1 O2b . . 4\_456 91.84(9) ?  
X1 M2a1 O4a . . . 94.51(9) ?  
X1 M2a1 O6a . . 3\_666 92.94(9) ?  
X1 M2a1 O8b . . 2\_755 93.90(9) ?  
X1 M2a1 O13a . . . 174.55(11) ?  
X1 M2a1 H13a1 . . . 158.6(9) ?  
O2b M2a1 O4a 4\_456 . . 87.91(9) ?  
O2b M2a1 O6a 4\_456 . 3\_666 91.43(9) ?  
O2b M2a1 O8b 4\_456 . 2\_755 174.20(9) ?  
O2b M2a1 O13a 4\_456 . . 83.85(9) ?  
O2b M2a1 H13a1 4\_456 . . 88.5(8) ?  
O4a M2a1 O6a . . 3\_666 172.54(9) ?  
O4a M2a1 O8b . . 2\_755 90.87(9) ?  
O4a M2a1 O13a . . . 88.70(9) ?  
O4a M2a1 H13a1 . . . 106.9(8) ?  
O6a M2a1 O8b 3\_666 . 2\_755 89.05(9) ?  
O6a M2a1 O13a 3\_666 . . 83.84(9) ?  
O6a M2a1 H13a1 3\_666 . . 65.7(8) ?  
O8b M2a1 O13a 2\_755 . . 90.45(9) ?  
O8b M2a1 H13a1 2\_755 . . 86.4(8) ?  
O13a M2a1 H13a1 . . . 18.6(8) ?  
M2b2 M2b1 X2 . . . 0 ?  
M2b2 M2b1 O2a . . 4\_553 0 ?  
M2b2 M2b1 O4b . . . 0 ?  
M2b2 M2b1 O6b . . 3\_754 0 ?  
M2b2 M2b1 O8a . . 2\_744 0 ?  
M2b2 M2b1 O13b . . . 0 ?  
M2b2 M2b1 H13b2 . . . 0 ?  
X2 M2b1 O2a . . 4\_553 91.27(9) ?  
X2 M2b1 O4b . . . 95.66(9) ?  
X2 M2b1 O6b . . 3\_754 93.33(9) ?  
X2 M2b1 O8a . . 2\_744 94.35(9) ?  
X2 M2b1 O13b . . . 174.35(11) ?  
X2 M2b1 H13b2 . . . 156.1(9) ?  
O2a M2b1 O4b 4\_553 . . 87.69(9) ?  
O2a M2b1 O6b 4\_553 . 3\_754 91.49(9) ?  
O2a M2b1 O8a 4\_553 . 2\_744 174.30(9) ?  
O2a M2b1 O13b 4\_553 . . 84.92(9) ?  
O2a M2b1 H13b2 4\_553 . . 80.5(10) ?  
O4b M2b1 O6b . . 3\_754 170.99(9) ?  
O4b M2b1 O8a . . 2\_744 90.76(9) ?  
O4b M2b1 O13b . . . 88.36(9) ?  
O4b M2b1 H13b2 . . . 106.3(10) ?  
O6b M2b1 O8a 3\_754 . 2\_744 89.19(9) ?

O6b M2b1 O13b 3\_754 . . 82.62(9) ?  
 O6b M2b1 H13b2 3\_754 . . 64.7(10) ?  
 O8a M2b1 O13b 2\_744 . . 89.55(9) ?  
 O8a M2b1 H13b2 2\_744 . . 94.7(10) ?  
 O13b M2b1 H13b2 . . . 18.8(9) ?  
 M2a1 M2a2 X1 . . . 0 ?  
 M2a1 M2a2 O2b . . 4\_456 0 ?  
 M2a1 M2a2 O4a . . . 0 ?  
 M2a1 M2a2 O6a . . 3\_666 0 ?  
 M2a1 M2a2 O8b . . 2\_755 0 ?  
 M2a1 M2a2 O13a . . . 0 ?  
 M2a1 M2a2 H13a1 . . . 0 ?  
 X1 M2a2 O2b . . 4\_456 91.84(9) ?  
 X1 M2a2 O4a . . . 94.51(9) ?  
 X1 M2a2 O6a . . 3\_666 92.94(9) ?  
 X1 M2a2 O8b . . 2\_755 93.90(9) ?  
 X1 M2a2 O13a . . . 174.55(11) ?  
 X1 M2a2 H13a1 . . . 158.6(9) ?  
 O2b M2a2 O4a 4\_456 . . 87.91(9) ?  
 O2b M2a2 O6a 4\_456 . 3\_666 91.43(9) ?  
 O2b M2a2 O8b 4\_456 . 2\_755 174.20(9) ?  
 O2b M2a2 O13a 4\_456 . . 83.85(9) ?  
 O2b M2a2 H13a1 4\_456 . . 88.5(8) ?  
 O4a M2a2 O6a . . 3\_666 172.54(9) ?  
 O4a M2a2 O8b . . 2\_755 90.87(9) ?  
 O4a M2a2 O13a . . . 88.70(9) ?  
 O4a M2a2 H13a1 . . . 106.9(8) ?  
 O6a M2a2 O8b 3\_666 . 2\_755 89.05(9) ?  
 O6a M2a2 O13a 3\_666 . . 83.84(9) ?  
 O6a M2a2 H13a1 3\_666 . . 65.7(8) ?  
 O8b M2a2 O13a 2\_755 . . 90.45(9) ?  
 O8b M2a2 H13a1 2\_755 . . 86.4(8) ?  
 O13a M2a2 H13a1 . . . 18.6(8) ?  
 M2b1 M2b2 X2 . . . 0 ?  
 M2b1 M2b2 O2a . . 4\_553 0 ?  
 M2b1 M2b2 O4b . . . 0 ?  
 M2b1 M2b2 O6b . . 3\_754 0 ?  
 M2b1 M2b2 O8a . . 2\_744 0 ?  
 M2b1 M2b2 O13b . . . 0 ?  
 M2b1 M2b2 H13b2 . . . 0 ?  
 X2 M2b2 O2a . . 4\_553 91.27(9) ?  
 X2 M2b2 O4b . . . 95.66(9) ?  
 X2 M2b2 O6b . . 3\_754 93.33(9) ?  
 X2 M2b2 O8a . . 2\_744 94.35(9) ?  
 X2 M2b2 O13b . . . 174.35(11) ?  
 X2 M2b2 H13b2 . . . 156.1(9) ?  
 O2a M2b2 O4b 4\_553 . . 87.69(9) ?  
 O2a M2b2 O6b 4\_553 . 3\_754 91.49(9) ?  
 O2a M2b2 O8a 4\_553 . 2\_744 174.30(9) ?  
 O2a M2b2 O13b 4\_553 . . 84.92(9) ?  
 O2a M2b2 H13b2 4\_553 . . 80.5(10) ?  
 O4b M2b2 O6b . . 3\_754 170.99(9) ?  
 O4b M2b2 O8a . . 2\_744 90.76(9) ?  
 O4b M2b2 O13b . . . 88.36(9) ?  
 O4b M2b2 H13b2 . . . 106.3(10) ?  
 O6b M2b2 O8a 3\_754 . 2\_744 89.19(9) ?  
 O6b M2b2 O13b 3\_754 . . 82.62(9) ?  
 O6b M2b2 H13b2 3\_754 . . 64.7(10) ?

O8a M2b2 O13b 2\_744 . . 89.55(9) ?  
 O8a M2b2 H13b2 2\_744 . . 94.7(10) ?  
 O13b M2b2 H13b2 . . . 18.8(9) ?  
 M3a2 M3a1 X1 . . . 0 ?  
 M3a2 M3a1 X1 . . 3\_666 0 ?  
 M3a2 M3a1 O3b . . 2\_754 0 ?  
 M3a2 M3a1 O3b . . 4\_456 0 ?  
 M3a2 M3a1 O7a . . . 0 ?  
 M3a2 M3a1 O7a . . 3\_666 0 ?  
 X1 M3a1 X1 . . 3\_666 180 ?  
 X1 M3a1 O3b . . 2\_754 88.21(8) ?  
 X1 M3a1 O3b . . 4\_456 91.79(8) ?  
 X1 M3a1 O7a . . . 88.36(8) ?  
 X1 M3a1 O7a . . 3\_666 91.64(8) ?  
 X1 M3a1 O3b 3\_666 . 2\_754 91.79(8) ?  
 X1 M3a1 O3b 3\_666 . 4\_456 88.21(8) ?  
 X1 M3a1 O7a 3\_666 . . 91.64(8) ?  
 X1 M3a1 O7a 3\_666 . 3\_666 88.36(8) ?  
 O3b M3a1 O3b 2\_754 . 4\_456 180 ?  
 O3b M3a1 O7a 2\_754 . . 89.81(8) ?  
 O3b M3a1 O7a 2\_754 . 3\_666 90.19(8) ?  
 O3b M3a1 O7a 4\_456 . . 90.19(8) ?  
 O3b M3a1 O7a 4\_456 . 3\_666 89.81(8) ?  
 O7a M3a1 O7a . . 3\_666 180 ?  
 M3b2 M3b1 X2 . . . 0 ?  
 M3b2 M3b1 X2 . . 3\_754 0 ?  
 M3b2 M3b1 O3a . . 2\_745 0 ?  
 M3b2 M3b1 O3a . . 4\_553 0 ?  
 M3b2 M3b1 O7b . . . 0 ?  
 M3b2 M3b1 O7b . . 3\_754 0 ?  
 X2 M3b1 X2 . . 3\_754 180 ?  
 X2 M3b1 O3a . . 2\_745 88.22(8) ?  
 X2 M3b1 O3a . . 4\_553 91.78(8) ?  
 X2 M3b1 O7b . . . 87.15(8) ?  
 X2 M3b1 O7b . . 3\_754 92.85(8) ?  
 X2 M3b1 O3a 3\_754 . 2\_745 91.78(8) ?  
 X2 M3b1 O3a 3\_754 . 4\_553 88.22(8) ?  
 X2 M3b1 O7b 3\_754 . . 92.85(8) ?  
 X2 M3b1 O7b 3\_754 . 3\_754 87.15(8) ?  
 O3a M3b1 O3a 2\_745 . 4\_553 180 ?  
 O3a M3b1 O7b 2\_745 . . 90.73(8) ?  
 O3a M3b1 O7b 2\_745 . 3\_754 89.27(8) ?  
 O3a M3b1 O7b 4\_553 . . 89.27(8) ?  
 O3a M3b1 O7b 4\_553 . 3\_754 90.73(8) ?  
 O7b M3b1 O7b . . 3\_754 180 ?  
 M3a1 M3a2 X1 . . . 0 ?  
 M3a1 M3a2 X1 . . 3\_666 0 ?  
 M3a1 M3a2 O3b . . 2\_754 0 ?  
 M3a1 M3a2 O3b . . 4\_456 0 ?  
 M3a1 M3a2 O7a . . . 0 ?  
 M3a1 M3a2 O7a . . 3\_666 0 ?  
 X1 M3a2 X1 . . 3\_666 180 ?  
 X1 M3a2 O3b . . 2\_754 88.21(8) ?  
 X1 M3a2 O3b . . 4\_456 91.79(8) ?  
 X1 M3a2 O7a . . . 88.36(8) ?  
 X1 M3a2 O7a . . 3\_666 91.64(8) ?  
 X1 M3a2 O3b 3\_666 . 2\_754 91.79(8) ?  
 X1 M3a2 O3b 3\_666 . 4\_456 88.21(8) ?



X1 M3a2 O7a 3\_666 . . 91.64(8) ?  
X1 M3a2 O7a 3\_666 . 3\_666 88.36(8) ?  
O3b M3a2 O3b 2\_754 . 4\_456 180 ?  
O3b M3a2 O7a 2\_754 . . 89.81(8) ?  
O3b M3a2 O7a 2\_754 . 3\_666 90.19(8) ?  
O3b M3a2 O7a 4\_456 . . 90.19(8) ?  
O3b M3a2 O7a 4\_456 . 3\_666 89.81(8) ?  
O7a M3a2 O7a . . 3\_666 180 ?  
M3b1 M3b2 X2 . . . 0 ?  
M3b1 M3b2 X2 . . 3\_754 0 ?  
M3b1 M3b2 O3a . . 2\_745 0 ?  
M3b1 M3b2 O3a . . 4\_553 0 ?  
M3b1 M3b2 O7b . . . 0 ?  
M3b1 M3b2 O7b . . 3\_754 0 ?  
X2 M3b2 X2 . . 3\_754 180 ?  
X2 M3b2 O3a . . 2\_745 88.22(8) ?  
X2 M3b2 O3a . . 4\_553 91.78(8) ?  
X2 M3b2 O7b . . . 87.15(8) ?  
X2 M3b2 O7b . . 3\_754 92.85(8) ?  
X2 M3b2 O3a 3\_754 . 2\_745 91.78(8) ?  
X2 M3b2 O3a 3\_754 . 4\_553 88.22(8) ?  
X2 M3b2 O7b 3\_754 . . 92.85(8) ?  
X2 M3b2 O7b 3\_754 . 3\_754 87.15(8) ?  
O3a M3b2 O3a 2\_745 . 4\_553 180 ?  
O3a M3b2 O7b 2\_745 . . 90.73(8) ?  
O3a M3b2 O7b 2\_745 . 3\_754 89.27(8) ?  
O3a M3b2 O7b 4\_553 . . 89.27(8) ?  
O3a M3b2 O7b 4\_553 . 3\_754 90.73(8) ?  
O7b M3b2 O7b . . 3\_754 180 ?  
O5a P2a O6a . . . 110.09(11) ?  
O5a P2a O7a . . . 110.18(11) ?  
O5a P2a O8a . . . 107.05(11) ?  
O6a P2a O7a . . . 110.33(11) ?  
O6a P2a O8a . . . 109.98(11) ?  
O7a P2a O8a . . . 109.15(11) ?  
O5b P2b O6b . . . 109.80(11) ?  
O5b P2b O7b . . . 109.96(11) ?  
O5b P2b O8b . . . 107.36(11) ?  
O6b P2b O7b . . . 110.65(11) ?  
O6b P2b O8b . . . 109.92(11) ?  
O7b P2b O8b . . . 109.09(11) ?  
O1a P1a O2a . . . 109.84(11) ?  
O1a P1a O3a . . . 109.88(11) ?  
O1a P1a O4a . . . 108.09(11) ?  
O2a P1a O3a . . . 110.26(11) ?  
O2a P1a O4a . . . 110.13(11) ?  
O3a P1a O4a . . . 108.60(11) ?  
O1b P1b O2b . . . 110.69(11) ?  
O1b P1b O3b . . . 109.88(11) ?  
O1b P1b O4b . . . 107.15(11) ?  
O2b P1b O3b . . . 110.07(11) ?  
O2b P1b O4b . . . 109.65(11) ?  
O3b P1b O4b . . . 109.35(11) ?  
Ow1 K1 Ha1a . . . 0 ?  
K1 Ow1 Ha1a . . . 0 ?  
M2a1 X1 M2a2 . . . 0 ?  
M2a1 X1 M3a1 . . . 136.56(13) ?  
M2a1 X1 M3a2 . . . 136.56(13) ?

M2a1 X1 H13b1 . . 2\_754 132.7(10) ?  
M2a2 X1 M3a1 . . . 136.56(13) ?  
M2a2 X1 M3a2 . . . 136.56(13) ?  
M2a2 X1 H13b1 . . 2\_754 132.7(10) ?  
M3a1 X1 M3a2 . . . 0 ?  
M3a1 X1 H13b1 . . 2\_754 90.7(10) ?  
M3a2 X1 H13b1 . . 2\_754 90.7(10) ?  
M2b1 X2 M2b2 . . . 0 ?  
M2b1 X2 M3b1 . . . 135.70(13) ?  
M2b1 X2 M3b2 . . . 135.70(13) ?  
M2b1 X2 H13a2 . . 2\_745 138.6(10) ?  
M2b2 X2 M3b1 . . . 135.70(13) ?  
M2b2 X2 M3b2 . . . 135.70(13) ?  
M2b2 X2 H13a2 . . 2\_745 138.6(10) ?  
M3b1 X2 M3b2 . . . 0 ?  
M3b1 X2 H13a2 . . 2\_745 84.8(10) ?  
M3b2 X2 H13a2 . . 2\_745 84.8(10) ?  
M1b1 O1a M1b2 1\_566 . 1\_566 0 ?  
M1b1 O1a P1a 1\_566 . . 144.82(14) ?  
M1b1 O1a O4a 1\_566 . . 144.91(11) ?  
M1b1 O1a H11a1 1\_566 . 4\_565 102.7(12) ?  
M1b2 O1a P1a 1\_566 . . 144.82(14) ?  
M1b2 O1a O4a 1\_566 . . 144.91(11) ?  
M1b2 O1a H11a1 1\_566 . 4\_565 102.7(12) ?  
P1a O1a O4a . . . 36.14(7) ?  
P1a O1a H11a1 . . 4\_565 108.4(11) ?  
O4a O1a H11a1 . . 4\_565 77.6(12) ?  
M1a1 O1b M1a2 1\_644 . 1\_644 0 ?  
M1a1 O1b P1b 1\_644 . . 144.48(13) ?  
M1a1 O1b O4b 1\_644 . . 144.75(11) ?  
M1a1 O1b H11b1 1\_644 . 4\_544 104.8(13) ?  
M1a2 O1b P1b 1\_644 . . 144.48(13) ?  
M1a2 O1b O4b 1\_644 . . 144.75(11) ?  
M1a2 O1b H11b1 1\_644 . 4\_544 104.8(13) ?  
P1b O1b O4b . . . 36.63(7) ?  
P1b O1b H11b1 . . 4\_544 104.1(12) ?  
O4b O1b H11b1 . . 4\_544 71.0(13) ?  
M2b1 O2a M2b2 4\_556 . 4\_556 0 ?  
M2b1 O2a P1a 4\_556 . . 136.14(12) ?  
M2b1 O2a H11b2 4\_556 . 1\_566 110.1(9) ?  
M2b1 O2a H15b2 4\_556 . 2\_754 108.5(11) ?  
M2b2 O2a P1a 4\_556 . . 136.14(12) ?  
M2b2 O2a H11b2 4\_556 . 1\_566 110.1(9) ?  
M2b2 O2a H15b2 4\_556 . 2\_754 108.5(11) ?  
P1a O2a H11b2 . . 1\_566 102.1(10) ?  
P1a O2a H15b2 . . 2\_754 106.6(10) ?  
H11b2 O2a H15b2 1\_566 . 2\_754 78.0(17) ?  
M2a1 O2b M2a2 4\_653 . 4\_653 0 ?  
M2a1 O2b P1b 4\_653 . . 136.29(12) ?  
M2a1 O2b H11a2 4\_653 . 1\_644 106.3(10) ?  
M2a2 O2b P1b 4\_653 . . 136.29(12) ?  
M2a2 O2b H11a2 4\_653 . 1\_644 106.3(10) ?  
P1b O2b H11a2 . . 1\_644 102.8(11) ?  
M3b1 O3a M3b2 2\_755 . 2\_755 0 ?  
M3b1 O3a P1a 2\_755 . . 137.94(12) ?  
M3b1 O3a O4a 2\_755 . . 136.15(10) ?  
M3b1 O3a H13a2 2\_755 . . 87.7(10) ?  
M3b1 O3a H14b2 2\_755 . 4\_556 114.7(10) ?

M3b2 O3a P1a 2\_755 . . 137.94(12) ?  
M3b2 O3a O4a 2\_755 . . 136.15(10) ?  
M3b2 O3a H13a2 2\_755 . . 87.7(10) ?  
M3b2 O3a H14b2 2\_755 . 4\_556 114.7(10) ?  
P1a O3a O4a . . . 35.64(7) ?  
P1a O3a H13a2 . . . 109.2(12) ?  
P1a O3a H14b2 . . 4\_556 107.1(10) ?  
O4a O3a H13a2 . . . 73.5(12) ?  
O4a O3a H14b2 . . 4\_556 98.1(11) ?  
H13a2 O3a H14b2 . . 4\_556 74.2(16) ?  
M3a1 O3b M3a2 2\_744 . 2\_744 0 ?  
M3a1 O3b P1b 2\_744 . . 138.00(13) ?  
M3a1 O3b H13b1 2\_744 . . 83.2(9) ?  
M3a1 O3b H14a1 2\_744 . 4\_653 111.3(12) ?  
M3a2 O3b P1b 2\_744 . . 138.00(13) ?  
M3a2 O3b H13b1 2\_744 . . 83.2(9) ?  
M3a2 O3b H14a1 2\_744 . 4\_653 111.3(12) ?  
P1b O3b H13b1 . . . 111.7(10) ?  
P1b O3b H14a1 . . 4\_653 110.4(12) ?  
H13b1 O3b H14a1 . . 4\_653 76.6(15) ?  
M2a1 O4a M2a2 . . . 0 ?  
M2a1 O4a P1a . . . 142.28(12) ?  
M2a1 O4a O1a . . . 158.33(12) ?  
M2a1 O4a O3a . . . 108.44(10) ?  
M2a1 O4a H11a2 . . 4\_565 92.9(8) ?  
M2a2 O4a P1a . . . 142.28(12) ?  
M2a2 O4a O1a . . . 158.33(12) ?  
M2a2 O4a O3a . . . 108.44(10) ?  
M2a2 O4a H11a2 . . 4\_565 92.9(8) ?  
P1a O4a O1a . . . 35.77(7) ?  
P1a O4a O3a . . . 35.76(7) ?  
P1a O4a H11a2 . . 4\_565 102.9(9) ?  
O1a O4a O3a . . . 60.53(8) ?  
O1a O4a H11a2 . . 4\_565 72.2(8) ?  
O3a O4a H11a2 . . 4\_565 99.3(11) ?  
M2b1 O4b M2b2 . . . 0 ?  
M2b1 O4b P1b . . . 144.39(13) ?  
M2b1 O4b O1b . . . 160.14(12) ?  
M2b2 O4b P1b . . . 144.39(13) ?  
M2b2 O4b O1b . . . 160.14(12) ?  
P1b O4b O1b . . . 36.22(7) ?  
M1a1 O5a M1a2 . . . 0 ?  
M1a1 O5a P2a . . . 143.01(13) ?  
M1a1 O5a O8a . . . 148.35(11) ?  
M1a1 O5a H9b1 . . 4\_555 106.0(15) ?  
M1a2 O5a P2a . . . 143.01(13) ?  
M1a2 O5a O8a . . . 148.35(11) ?  
M1a2 O5a H9b1 . . 4\_555 106.0(15) ?  
P2a O5a O8a . . . 36.85(7) ?  
P2a O5a H9b1 . . 4\_555 108.6(15) ?  
O8a O5a H9b1 . . 4\_555 77.1(15) ?  
M1b1 O5b M1b2 . . . 0 ?  
M1b1 O5b P2b . . . 143.58(13) ?  
M1b1 O5b O8b . . . 147.76(11) ?  
M1b1 O5b H9a1 . . 4\_654 110.1(13) ?  
M1b2 O5b P2b . . . 143.58(13) ?  
M1b2 O5b O8b . . . 147.76(11) ?  
M1b2 O5b H9a1 . . 4\_654 110.1(13) ?

P2b O5b O8b . . . 36.54(7) ?  
P2b O5b H9a1 . . 4\_654 104.8(12) ?  
O8b O5b H9a1 . . 4\_654 75.8(12) ?  
M2a1 O6a M2a2 3\_666 . 3\_666 0 ?  
M2a1 O6a P2a 3\_666 . . 135.58(12) ?  
M2a1 O6a H9a2 3\_666 . . 110.4(10) ?  
M2a1 O6a H13a1 3\_666 . 3\_666 68.1(9) ?  
M2a2 O6a P2a 3\_666 . . 135.58(12) ?  
M2a2 O6a H9a2 3\_666 . . 110.4(10) ?  
M2a2 O6a H13a1 3\_666 . 3\_666 68.1(9) ?  
P2a O6a H9a2 . . . 103.5(11) ?  
P2a O6a H13a1 . . 3\_666 146.4(9) ?  
H9a2 O6a H13a1 . . 3\_666 81.9(16) ?  
M2b1 O6b M2b2 3\_754 . 3\_754 0 ?  
M2b1 O6b P2b 3\_754 . . 135.96(13) ?  
M2b1 O6b H13b2 3\_754 . 3\_754 68.8(10) ?  
M2b2 O6b P2b 3\_754 . . 135.96(13) ?  
M2b2 O6b H13b2 3\_754 . 3\_754 68.8(10) ?  
P2b O6b H13b2 . . 3\_754 140.8(8) ?  
M3a1 O7a M3a2 . . . 0 ?  
M3a1 O7a P2a . . . 137.81(12) ?  
M3a1 O7a H13b1 . . 2\_754 83.7(9) ?  
M3a1 O7a Ha1a . . 4\_565 109.4(14) ?  
M3a2 O7a P2a . . . 137.81(12) ?  
M3a2 O7a H13b1 . . 2\_754 83.7(9) ?  
M3a2 O7a Ha1a . . 4\_565 109.4(14) ?  
P2a O7a H13b1 . . 2\_754 111.8(10) ?  
P2a O7a Ha1a . . 4\_565 112.4(13) ?  
H13b1 O7a Ha1a 2\_754 . 4\_565 75.9(17) ?  
M3b1 O7b M3b2 . . . 0 ?  
M3b1 O7b P2b . . . 136.70(12) ?  
M3b1 O7b H13a2 . . 2\_745 80.0(9) ?  
M3b2 O7b P2b . . . 136.70(12) ?  
M3b2 O7b H13a2 . . 2\_745 80.0(9) ?  
P2b O7b H13a2 . . 2\_745 107.6(11) ?  
M2b1 O8a M2b2 2\_754 . 2\_754 0 ?  
M2b1 O8a P2a 2\_754 . . 145.38(13) ?  
M2b1 O8a O5a 2\_754 . . 156.97(12) ?  
M2b1 O8a H14b1 2\_754 . 4\_555 104.7(12) ?  
M2b2 O8a P2a 2\_754 . . 145.38(13) ?  
M2b2 O8a O5a 2\_754 . . 156.97(12) ?  
M2b2 O8a H14b1 2\_754 . 4\_555 104.7(12) ?  
P2a O8a O5a . . . 36.10(7) ?  
P2a O8a H14b1 . . 4\_555 109.9(12) ?  
O5a O8a H14b1 . . 4\_555 80.3(11) ?  
M2a1 O8b M2a2 2\_745 . 2\_745 0 ?  
M2a1 O8b P2b 2\_745 . . 146.45(13) ?  
M2a1 O8b O5b 2\_745 . . 157.71(12) ?  
M2a1 O8b H14a2 2\_745 . 4\_654 106.0(12) ?  
M2a2 O8b P2b 2\_745 . . 146.45(13) ?  
M2a2 O8b O5b 2\_745 . . 157.71(12) ?  
M2a2 O8b H14a2 2\_745 . 4\_654 106.0(12) ?  
P2b O8b O5b . . . 36.10(7) ?  
P2b O8b H14a2 . . 4\_654 107.6(12) ?  
O5b O8b H14a2 . . 4\_654 78.8(11) ?  
M1a1 O9a M1a2 . . . 0 ?  
M1a1 O9a H9a1 . . . 133(3) ?  
M1a1 O9a H9a2 . . . 97(3) ?

M1a2 O9a H9a1 . . . 133(3) ?  
M1a2 O9a H9a2 . . . 97(3) ?  
H9a1 O9a H9a2 . . . 109(4) ?  
M1b1 O9b M1b2 . . . 0 ?  
M1b1 O9b H9b1 . . . 123(3) ?  
M1b2 O9b H9b1 . . . 123(3) ?  
M1a1 O10a M1a2 . . . 0 ?  
M1a1 O10a H10a2 . . . 127(3) ?  
M1a1 O10a H12a1 . . 4\_564 122.1(11) ?  
M1a2 O10a H10a2 . . . 127(3) ?  
M1a2 O10a H12a1 . . 4\_564 122.1(11) ?  
H10a2 O10a H12a1 . . 4\_564 93(3) ?  
M1b1 O10b M1b2 . . . 0 ?  
M1b1 O10b H10b1 . . . 95(3) ?  
M1b1 O10b H10b2 . . . 128(3) ?  
M1b2 O10b H10b1 . . . 95(3) ?  
M1b2 O10b H10b2 . . . 128(3) ?  
H10b1 O10b H10b2 . . . 109(4) ?  
M1a1 O11a M1a2 . . . 0 ?  
M1a1 O11a H11a1 . . . 131(3) ?  
M1a1 O11a H11a2 . . . 102(3) ?  
M1a2 O11a H11a1 . . . 131(3) ?  
M1a2 O11a H11a2 . . . 102(3) ?  
H11a1 O11a H11a2 . . . 109(4) ?  
M1b1 O11b M1b2 . . . 0 ?  
M1b1 O11b H11b1 . . . 141(3) ?  
M1b1 O11b H11b2 . . . 99(2) ?  
M1b2 O11b H11b1 . . . 141(3) ?  
M1b2 O11b H11b2 . . . 99(2) ?  
H11b1 O11b H11b2 . . . 109(3) ?  
M1a1 O12a M1a2 . . . 0 ?  
M1a1 O12a H12a1 . . . 92(3) ?  
M1a1 O12a H12a2 . . . 98(3) ?  
M1a2 O12a H12a1 . . . 92(3) ?  
M1a2 O12a H12a2 . . . 98(3) ?  
H12a1 O12a H12a2 . . . 109(3) ?  
M1b1 O12b M1b2 . . . 0 ?  
M1b1 O12b H10b1 . . 4\_544 117.5(10) ?  
M1b1 O12b H12b1 . . . 106(3) ?  
M1b2 O12b H10b1 . . 4\_544 117.5(10) ?  
M1b2 O12b H12b1 . . . 106(3) ?  
H10b1 O12b H12b1 4\_544 . . 105(3) ?  
M2a1 O13a M2a2 . . . 0 ?  
M2a1 O13a H13a1 . . . 111(3) ?  
M2a1 O13a H13a2 . . . 119(3) ?  
M2a2 O13a H13a1 . . . 111(3) ?  
M2a2 O13a H13a2 . . . 119(3) ?  
H13a1 O13a H13a2 . . . 109(4) ?  
M2b1 O13b M2b2 . . . 0 ?  
M2b1 O13b H13b1 . . . 134(3) ?  
M2b1 O13b H13b2 . . . 109(3) ?  
M2b1 O13b H15b2 . . 3\_753 93.3(7) ?  
M2b2 O13b H13b1 . . . 134(3) ?  
M2b2 O13b H13b2 . . . 109(3) ?  
M2b2 O13b H15b2 . . 3\_753 93.3(7) ?  
H13b1 O13b H13b2 . . . 109(4) ?  
H13b1 O13b H15b2 . . 3\_753 122(3) ?  
H13b2 O13b H15b2 . . 3\_753 70(3) ?

H10b2 O14a H12a2 4\_455 . . 81.3(15) ?  
H10b2 O14a H14a1 4\_455 . . 136(3) ?  
H10b2 O14a H14a2 4\_455 . . 111(3) ?  
H10b2 O14a H15b1 4\_455 . 2\_654 70.2(15) ?  
H12a2 O14a H14a1 . . . 101(3) ?  
H12a2 O14a H14a2 . . . 110(3) ?  
H12a2 O14a H15b1 . . 2\_654 151.0(15) ?  
H14a1 O14a H14a2 . . . 109(4) ?  
H14a1 O14a H15b1 . . 2\_654 103(3) ?  
H14a2 O14a H15b1 . . 2\_654 76(3) ?  
H10a2 O14b H12b1 4\_554 . . 77.6(16) ?  
H10a2 O14b H14b1 4\_554 . . 113(3) ?  
H10a2 O14b H14b2 4\_554 . . 129(3) ?  
H12b1 O14b H14b1 . . . 115(3) ?  
H12b1 O14b H14b2 . . . 108(3) ?  
H14b1 O14b H14b2 . . . 109(3) ?  
H13a1 O15a H15a1 . . . 106(4) ?  
H13b2 O15b H15b1 . . . 94(3) ?  
H13b2 O15b H15b2 . . . 97(3) ?  
H15b1 O15b H15b2 . . . 109(4) ?  
O5b H9a1 O9a 4\_455 . . 170(4) ?  
O5b H9a1 H9a2 4\_455 . . 136(3) ?  
O9a H9a1 H9a2 . . . 35(2) ?  
M1a1 H9a2 M1a2 . . . 0 ?  
M1a1 H9a2 O6a . . . 114.2(18) ?  
M1a1 H9a2 O9a . . . 63(2) ?  
M1a1 H9a2 H9a1 . . . 92(2) ?  
M1a2 H9a2 O6a . . . 114.2(18) ?  
M1a2 H9a2 O9a . . . 63(2) ?  
M1a2 H9a2 H9a1 . . . 92(2) ?  
O6a H9a2 O9a . . . 177(4) ?  
O6a H9a2 H9a1 . . . 147(3) ?  
O9a H9a2 H9a1 . . . 36(2) ?  
O5a H9b1 O9b 4\_554 . . 157(5) ?  
O5a H9b1 H11a1 4\_554 . 4\_554 93.8(17) ?  
O9b H9b1 H11a1 . . 4\_554 100(4) ?  
O10a H10a2 O14b . . 4\_555 153(4) ?  
O10a H10a2 H12a1 . . 4\_564 65(3) ?  
O10a H10a2 H12b1 . . 4\_555 114(3) ?  
O10a H10a2 H14b1 . . 4\_555 139(4) ?  
O14b H10a2 H12a1 4\_555 . 4\_564 142(2) ?  
O14b H10a2 H12b1 4\_555 . 4\_555 49.3(12) ?  
O14b H10a2 H14b1 4\_555 . 4\_555 18.2(9) ?  
H12a1 H10a2 H12b1 4\_564 . 4\_555 140(2) ?  
H12a1 H10a2 H14b1 4\_564 . 4\_555 150(2) ?  
H12b1 H10a2 H14b1 4\_555 . 4\_555 58.1(15) ?  
M1b1 H10b1 M1b2 . . . 0 ?  
M1b1 H10b1 O10b . . . 65(3) ?  
M1b1 H10b1 O12b . . 4\_545 138.0(16) ?  
M1b1 H10b1 H10b2 . . . 91(3) ?  
M1b1 H10b1 H12b1 . . 4\_545 126.6(18) ?  
M1b2 H10b1 O10b . . . 65(3) ?  
M1b2 H10b1 O12b . . 4\_545 138.0(16) ?  
M1b2 H10b1 H10b2 . . . 91(3) ?  
M1b2 H10b1 H12b1 . . 4\_545 126.6(18) ?  
O10b H10b1 O12b . . 4\_545 153(4) ?  
O10b H10b1 H10b2 . . . 36(2) ?  
O10b H10b1 H12b1 . . 4\_545 168(4) ?

O12b H10b1 H10b2 4\_545 . . 118(3) ?  
O12b H10b1 H12b1 4\_545 . 4\_545 19.6(10) ?  
H10b2 H10b1 H12b1 . . 4\_545 137(3) ?  
O10b H10b2 O14a . . 4\_654 145(4) ?  
O10b H10b2 H10b1 . . . 35(2) ?  
O10b H10b2 H14a2 . . 4\_654 133(3) ?  
O14a H10b2 H10b1 4\_654 . . 172(3) ?  
O14a H10b2 H14a2 4\_654 . 4\_654 18.4(9) ?  
H10b1 H10b2 H14a2 . . 4\_654 154(3) ?  
O1a H11a1 O11a 4\_564 . . 156(4) ?  
O1a H11a1 H9b1 4\_564 . 4\_555 94.4(14) ?  
O1a H11a1 H11a2 4\_564 . . 120(3) ?  
O11a H11a1 H9b1 . . 4\_555 108(3) ?  
O11a H11a1 H11a2 . . . 36(2) ?  
H9b1 H11a1 H11a2 4\_555 . . 137(3) ?  
M1a1 H11a2 M1a2 . . . 0 ?  
M1a1 H11a2 O2b . . 1\_466 112.3(17) ?  
M1a1 H11a2 O4a . . 4\_564 151(2) ?  
M1a1 H11a2 O11a . . . 59(2) ?  
M1a1 H11a2 H11a1 . . . 88(2) ?  
M1a2 H11a2 O2b . . 1\_466 112.3(17) ?  
M1a2 H11a2 O4a . . 4\_564 151(2) ?  
M1a2 H11a2 O11a . . . 59(2) ?  
M1a2 H11a2 H11a1 . . . 88(2) ?  
O2b H11a2 O4a 1\_466 . 4\_564 71.7(10) ?  
O2b H11a2 O11a 1\_466 . . 161(4) ?  
O2b H11a2 H11a1 1\_466 . . 160(3) ?  
O4a H11a2 O11a 4\_564 . . 125(3) ?  
O4a H11a2 H11a1 4\_564 . . 90(2) ?  
O11a H11a2 H11a1 . . . 35(2) ?  
O1b H11b1 O11b 4\_545 . . 173(5) ?  
O1b H11b1 H11b2 4\_545 . . 142(3) ?  
O11b H11b1 H11b2 . . . 33.9(17) ?  
M1b1 H11b2 M1b2 . . . 0 ?  
M1b1 H11b2 O2a . . 1\_544 115.4(17) ?  
M1b1 H11b2 O11b . . . 61(2) ?  
M1b1 H11b2 H11b1 . . . 94(2) ?  
M1b2 H11b2 O2a . . 1\_544 115.4(17) ?  
M1b2 H11b2 O11b . . . 61(2) ?  
M1b2 H11b2 H11b1 . . . 94(2) ?  
O2a H11b2 O11b 1\_544 . . 170(5) ?  
O2a H11b2 H11b1 1\_544 . . 141(3) ?  
O11b H11b2 H11b1 . . . 37(2) ?  
M1a1 H12a1 M1a2 . . . 0 ?  
M1a1 H12a1 O10a . . 4\_565 138.7(17) ?  
M1a1 H12a1 O12a . . . 68(3) ?  
M1a1 H12a1 H10a2 . . 4\_565 120.9(19) ?  
M1a1 H12a1 H12a2 . . . 77(3) ?  
M1a2 H12a1 O10a . . 4\_565 138.7(17) ?  
M1a2 H12a1 O12a . . . 68(3) ?  
M1a2 H12a1 H10a2 . . 4\_565 120.9(19) ?  
M1a2 H12a1 H12a2 . . . 77(3) ?  
O10a H12a1 O12a 4\_565 . . 150(4) ?  
O10a H12a1 H10a2 4\_565 . 4\_565 21.8(11) ?  
O10a H12a1 H12a2 4\_565 . . 140(3) ?  
O12a H12a1 H10a2 . . 4\_565 150(3) ?  
O12a H12a1 H12a2 . . . 36(2) ?  
H10a2 H12a1 H12a2 4\_565 . . 161(4) ?

M1a1 H12a2 M1a2 . . . 0 ?  
M1a1 H12a2 O12a . . . 62(2) ?  
M1a1 H12a2 O14a . . . 135.9(19) ?  
M1a1 H12a2 H12a1 . . . 70(2) ?  
M1a1 H12a2 H14a1 . . . 135.1(19) ?  
M1a1 H12a2 H14a2 . . . 117.1(18) ?  
M1a2 H12a2 O12a . . . 62(2) ?  
M1a2 H12a2 O14a . . . 135.9(19) ?  
M1a2 H12a2 H12a1 . . . 70(2) ?  
M1a2 H12a2 H14a1 . . . 135.1(19) ?  
M1a2 H12a2 H14a2 . . . 117.1(18) ?  
O12a H12a2 O14a . . . 162(4) ?  
O12a H12a2 H12a1 . . . 34(2) ?  
O12a H12a2 H14a1 . . . 149(4) ?  
O12a H12a2 H14a2 . . . 176(4) ?  
O14a H12a2 H12a1 . . . 139(3) ?  
O14a H12a2 H14a1 . . . 21.9(12) ?  
O14a H12a2 H14a2 . . . 19.4(9) ?  
H12a1 H12a2 H14a1 . . . 118(3) ?  
H12a1 H12a2 H14a2 . . . 149(3) ?  
H14a1 H12a2 H14a2 . . . 34.8(14) ?  
O12b H12b1 O14b . . . 174(4) ?  
O12b H12b1 H10a2 . . 4\_554 131(3) ?  
O12b H12b1 H10b1 . . 4\_544 55(3) ?  
O12b H12b1 H14b1 . . . 164(4) ?  
O12b H12b1 H14b2 . . . 154(4) ?  
O14b H12b1 H10a2 . . 4\_554 53.1(13) ?  
O14b H12b1 H10b1 . . 4\_544 119(2) ?  
O14b H12b1 H14b1 . . . 18.3(9) ?  
O14b H12b1 H14b2 . . . 20.6(10) ?  
H10a2 H12b1 H10b1 4\_554 . 4\_544 128(2) ?  
H10a2 H12b1 H14b1 4\_554 . . 60.8(16) ?  
H10a2 H12b1 H14b2 4\_554 . . 67.0(17) ?  
H10b1 H12b1 H14b1 4\_544 . . 130(2) ?  
H10b1 H12b1 H14b2 4\_544 . . 98(2) ?  
H14b1 H12b1 H14b2 . . . 34.1(12) ?  
M2a1 H13a1 M2a2 . . . 0 ?  
M2a1 H13a1 O6a . . 3\_666 46.2(8) ?  
M2a1 H13a1 O13a . . . 50(2) ?  
M2a1 H13a1 O15a . . . 139(2) ?  
M2a1 H13a1 H13a2 . . . 77(3) ?  
M2a1 H13a1 H15a1 . . . 121(2) ?  
M2a2 H13a1 O6a . . 3\_666 46.2(8) ?  
M2a2 H13a1 O13a . . . 50(2) ?  
M2a2 H13a1 O15a . . . 139(2) ?  
M2a2 H13a1 H13a2 . . . 77(3) ?  
M2a2 H13a1 H15a1 . . . 121(2) ?  
O6a H13a1 O13a 3\_666 . . 96(3) ?  
O6a H13a1 O15a 3\_666 . . 93.3(15) ?  
O6a H13a1 H13a2 3\_666 . . 122(3) ?  
O6a H13a1 H15a1 3\_666 . . 75.7(17) ?  
O13a H13a1 O15a . . . 170(4) ?  
O13a H13a1 H13a2 . . . 35(2) ?  
O13a H13a1 H15a1 . . . 160(4) ?  
O15a H13a1 H13a2 . . . 140(3) ?  
O15a H13a1 H15a1 . . . 21.7(12) ?  
H13a2 H13a1 H15a1 . . . 161(4) ?  
X2 H13a2 O3a 2\_755 . . 73.4(11) ?



X2 H13a2 O7b 2\_755 . 2\_755 66.9(10) ?  
X2 H13a2 O13a 2\_755 . . 149(4) ?  
X2 H13a2 H13a1 2\_755 . . 116(3) ?  
X2 H13a2 H14b2 2\_755 . 4\_556 73.2(14) ?  
O3a H13a2 O7b . . 2\_755 71.5(10) ?  
O3a H13a2 O13a . . . 137(4) ?  
O3a H13a2 H13a1 . . . 169(4) ?  
O3a H13a2 H14b2 . . 4\_556 49.2(12) ?  
O7b H13a2 O13a 2\_755 . . 123(3) ?  
O7b H13a2 H13a1 2\_755 . . 106(2) ?  
O7b H13a2 H14b2 2\_755 . 4\_556 115.5(17) ?  
O13a H13a2 H13a1 . . . 35(2) ?  
O13a H13a2 H14b2 . . 4\_556 118(3) ?  
H13a1 H13a2 H14b2 . . 4\_556 137(3) ?  
X1 H13b1 O3b 2\_744 . . 68.2(11) ?  
X1 H13b1 O7a 2\_744 . 2\_744 68.8(11) ?  
X1 H13b1 O13b 2\_744 . . 173(4) ?  
X1 H13b1 H13b2 2\_744 . . 141(3) ?  
O3b H13b1 O7a . . 2\_744 67.0(10) ?  
O3b H13b1 O13b . . . 114(3) ?  
O3b H13b1 H13b2 . . . 148(3) ?  
O7a H13b1 O13b 2\_744 . . 119(3) ?  
O7a H13b1 H13b2 2\_744 . . 126(3) ?  
O13b H13b1 H13b2 . . . 35(2) ?  
M2b1 H13b2 M2b2 . . . 0 ?  
M2b1 H13b2 O6b . . 3\_754 46.4(8) ?  
M2b1 H13b2 O13b . . . 52(2) ?  
M2b1 H13b2 O15b . . . 132(2) ?  
M2b1 H13b2 H13b1 . . . 85(2) ?  
M2b1 H13b2 H15b1 . . . 121(2) ?  
M2b1 H13b2 H15b1 . . 3\_753 107.4(19) ?  
M2b1 H13b2 H15b2 . . . 154(2) ?  
M2b1 H13b2 H15b2 . . 3\_753 87.2(16) ?  
M2b2 H13b2 O6b . . 3\_754 46.4(8) ?  
M2b2 H13b2 O13b . . . 52(2) ?  
M2b2 H13b2 O15b . . . 132(2) ?  
M2b2 H13b2 H13b1 . . . 85(2) ?  
M2b2 H13b2 H15b1 . . . 121(2) ?  
M2b2 H13b2 H15b1 . . 3\_753 107.4(19) ?  
M2b2 H13b2 H15b2 . . . 154(2) ?  
M2b2 H13b2 H15b2 . . 3\_753 87.2(16) ?  
O6b H13b2 O13b 3\_754 . . 97(3) ?  
O6b H13b2 O15b 3\_754 . . 87.6(16) ?  
O6b H13b2 H13b1 3\_754 . . 123(3) ?  
O6b H13b2 H15b1 3\_754 . . 74.9(16) ?  
O6b H13b2 H15b1 3\_754 . 3\_753 132.4(19) ?  
O6b H13b2 H15b2 3\_754 . . 109(2) ?  
O6b H13b2 H15b2 3\_754 . 3\_753 99.9(17) ?  
O13b H13b2 O15b . . . 150(4) ?  
O13b H13b2 H13b1 . . . 36(2) ?  
O13b H13b2 H15b1 . . . 166(4) ?  
O13b H13b2 H15b1 . . 3\_753 83(3) ?  
O13b H13b2 H15b2 . . . 145(4) ?  
O13b H13b2 H15b2 . . 3\_753 90(3) ?  
O15b H13b2 H13b1 . . . 119(3) ?  
O15b H13b2 H15b1 . . . 22.7(11) ?  
O15b H13b2 H15b1 . . 3\_753 116(2) ?  
O15b H13b2 H15b2 . . . 22.4(11) ?

O15b H13b2 H15b2 . . 3\_753 119.1(19) ?  
H13b1 H13b2 H15b1 . . . 142(3) ?  
H13b1 H13b2 H15b1 . . 3\_753 82(3) ?  
H13b1 H13b2 H15b2 . . . 109(3) ?  
H13b1 H13b2 H15b2 . . 3\_753 106(3) ?  
H15b1 H13b2 H15b1 . . 3\_753 111(2) ?  
H15b1 H13b2 H15b2 . . . 36.7(14) ?  
H15b1 H13b2 H15b2 . . 3\_753 102(2) ?  
H15b1 H13b2 H15b2 3\_753 . . 96(2) ?  
H15b1 H13b2 H15b2 3\_753 . 3\_753 32.7(13) ?  
H15b2 H13b2 H15b2 . . 3\_753 108(2) ?  
O3b H14a1 O14a 4\_456 . . 174(4) ?  
O3b H14a1 H12a2 4\_456 . . 129(2) ?  
O3b H14a1 H14a2 4\_456 . . 142(3) ?  
O14a H14a1 H12a2 . . . 57(2) ?  
O14a H14a1 H14a2 . . . 34(2) ?  
H12a2 H14a1 H14a2 . . . 76(2) ?  
O8b H14a2 O14a 4\_455 . . 177(4) ?  
O8b H14a2 H10b2 4\_455 . 4\_455 129(2) ?  
O8b H14a2 H12a2 4\_455 . . 132(2) ?  
O8b H14a2 H14a1 4\_455 . . 143(3) ?  
O8b H14a2 H15b1 4\_455 . 2\_654 93.3(18) ?  
O14a H14a2 H10b2 . . 4\_455 51(2) ?  
O14a H14a2 H12a2 . . . 51(2) ?  
O14a H14a2 H14a1 . . . 36(2) ?  
O14a H14a2 H15b1 . . 2\_654 84(3) ?  
H10b2 H14a2 H12a2 4\_455 . . 65.3(16) ?  
H10b2 H14a2 H14a1 4\_455 . . 86(3) ?  
H10b2 H14a2 H15b1 4\_455 . 2\_654 65.1(18) ?  
H12a2 H14a2 H14a1 . . . 70(2) ?  
H12a2 H14a2 H15b1 . . 2\_654 127(2) ?  
H14a1 H14a2 H15b1 . . 2\_654 91(3) ?  
O8a H14b1 O14b 4\_554 . . 172(4) ?  
O8a H14b1 H10a2 4\_554 . 4\_554 125(2) ?  
O8a H14b1 H12b1 4\_554 . . 137.8(19) ?  
O8a H14b1 H14b2 4\_554 . . 146(3) ?  
O14b H14b1 H10a2 . . 4\_554 49(2) ?  
O14b H14b1 H12b1 . . . 46(2) ?  
O14b H14b1 H14b2 . . . 36(2) ?  
H10a2 H14b1 H12b1 4\_554 . . 61.0(15) ?  
H10a2 H14b1 H14b2 4\_554 . . 82(2) ?  
H12b1 H14b1 H14b2 . . . 71(2) ?  
O3a H14b2 O14b 4\_553 . . 165(3) ?  
O3a H14b2 H12b1 4\_553 . . 124(2) ?  
O3a H14b2 H13a2 4\_553 . 4\_553 56.6(12) ?  
O3a H14b2 H14b1 4\_553 . . 135(3) ?  
O14b H14b2 H12b1 . . . 51(2) ?  
O14b H14b2 H13a2 . . 4\_553 126(3) ?  
O14b H14b2 H14b1 . . . 34.4(19) ?  
H12b1 H14b2 H13a2 . . 4\_553 174(2) ?  
H12b1 H14b2 H14b1 . . . 75(2) ?  
H13a2 H14b2 H14b1 4\_553 . . 100(3) ?  
O15a H15a1 H13a1 . . . 52(3) ?  
O14a H15b1 O15b 2\_644 . . 144(4) ?  
O14a H15b1 H13b2 2\_644 . . 151(2) ?  
O14a H15b1 H13b2 2\_644 . 3\_753 107.2(15) ?  
O14a H15b1 H14a2 2\_644 . 2\_644 19.4(9) ?  
O14a H15b1 H15b2 2\_644 . . 133(3) ?

O15b H15b1 H13b2 . . . 63(3) ?  
 O15b H15b1 H13b2 . . 3\_753 96(3) ?  
 O15b H15b1 H14a2 . . 2\_644 157(5) ?  
 O15b H15b1 H15b2 . . . 35(2) ?  
 H13b2 H15b1 H13b2 . . 3\_753 69(2) ?  
 H13b2 H15b1 H14a2 . . 2\_644 132(2) ?  
 H13b2 H15b1 H15b2 . . . 73(3) ?  
 H13b2 H15b1 H14a2 3\_753 . 2\_644 105.4(18) ?  
 H13b2 H15b1 H15b2 3\_753 . . 67(3) ?  
 H14a2 H15b1 H15b2 2\_644 . . 151(3) ?  
 O2a H15b2 O13b 2\_744 . 3\_753 72.8(11) ?  
 O2a H15b2 O15b 2\_744 . . 159(4) ?  
 O2a H15b2 H13b2 2\_744 . . 140(2) ?  
 O2a H15b2 H13b2 2\_744 . 3\_753 81.6(16) ?  
 O2a H15b2 H15b1 2\_744 . . 135(3) ?  
 O13b H15b2 O15b 3\_753 . . 110(3) ?  
 O13b H15b2 H13b2 3\_753 . . 89.2(17) ?  
 O13b H15b2 H13b2 3\_753 . 3\_753 20.0(10) ?  
 O13b H15b2 H15b1 3\_753 . . 76(2) ?  
 O15b H15b2 H13b2 . . . 61(2) ?  
 O15b H15b2 H13b2 . . 3\_753 108(3) ?  
 O15b H15b2 H15b1 . . . 35(2) ?  
 H13b2 H15b2 H13b2 . . 3\_753 71.9(19) ?  
 H13b2 H15b2 H15b1 . . . 70(2) ?  
 H13b2 H15b2 H15b1 3\_753 . . 80(3) ?  
 K1 Hala Ow1 . . . 0 ?  
 K1 Hala O7a . . 4\_564 171(5) ?  
 Ow1 Hala O7a . . 4\_564 171(5) ?

loop\_  
 \_geom\_torsion\_atom\_site\_label\_1  
 \_geom\_torsion\_atom\_site\_label\_2  
 \_geom\_torsion\_atom\_site\_label\_3  
 \_geom\_torsion\_atom\_site\_label\_4  
 \_geom\_torsion\_site\_symmetry\_1  
 \_geom\_torsion\_site\_symmetry\_2  
 \_geom\_torsion\_site\_symmetry\_3  
 \_geom\_torsion\_site\_symmetry\_4  
 \_geom\_torsion  
 \_geom\_torsion\_publ\_flag  
 ? ? ? ? ? ? ? ? ? ?

loop\_  
 \_geom\_hbond\_atom\_site\_label\_D  
 \_geom\_hbond\_atom\_site\_label\_H  
 \_geom\_hbond\_atom\_site\_label\_A  
 \_geom\_hbond\_site\_symmetry\_D  
 \_geom\_hbond\_site\_symmetry\_H  
 \_geom\_hbond\_site\_symmetry\_A  
 \_geom\_hbond\_distance\_DH  
 \_geom\_hbond\_distance\_HA  
 \_geom\_hbond\_distance\_DA  
 \_geom\_hbond\_angle\_DHA  
 \_geom\_hbond\_publ\_flag  
 O9a H9a1 O5b . . 4\_455 0.86(3) 1.83(3) 2.684(3) 170(4) ?  
 O9a H9a2 O6a . . . 0.84(3) 1.99(3) 2.835(3) 177(4) ?  
 O9b H9b1 O5a . . 4\_554 0.85(3) 1.89(3) 2.694(3) 157(5) ?  
 O10a H10a2 O14b . . 4\_555 0.84(4) 2.03(4) 2.807(3) 153(4) ?

|      |       |      |           |         |         |          |          |
|------|-------|------|-----------|---------|---------|----------|----------|
| O10b | H10b1 | O12b | . . 4_545 | 0.84(3) | 2.02(4) | 2.787(3) | 153(4) ? |
| O10b | H10b2 | O14a | . . 4_654 | 0.86(4) | 2.01(4) | 2.758(3) | 145(4) ? |
| O11a | H11a1 | O1a  | . . 4_564 | 0.82(3) | 2.01(3) | 2.773(3) | 156(4) ? |
| O11a | H11a2 | O2b  | . . 1_466 | 0.83(3) | 2.05(3) | 2.854(3) | 161(4) ? |
| O11a | H11a2 | O4a  | . . 4_564 | 0.83(3) | 2.50(4) | 3.048(3) | 125(3) ? |
| O11b | H11b1 | O1b  | . . 4_545 | 0.89(3) | 1.82(3) | 2.709(3) | 173(5) ? |
| O11b | H11b2 | O2a  | . . 1_544 | 0.83(3) | 2.01(3) | 2.832(3) | 170(5) ? |
| O12a | H12a1 | O10a | . . 4_565 | 0.83(4) | 2.06(4) | 2.809(3) | 150(4) ? |
| O12a | H12a2 | O14a | . . .     | 0.86(3) | 1.91(3) | 2.740(3) | 162(4) ? |
| O12b | H12b1 | O14b | . . .     | 0.82(4) | 1.93(4) | 2.748(3) | 174(4) ? |
| O13a | H13a1 | O15a | . . .     | 0.85(4) | 1.82(4) | 2.661(3) | 170(4) ? |
| O13a | H13a2 | X2   | . . 2_755 | 0.84(4) | 2.27(4) | 3.025(3) | 149(4) ? |
| O13a | H13a2 | O3a  | . . .     | 0.84(4) | 2.16(4) | 2.831(3) | 137(4) ? |
| O13a | H13a2 | O7b  | . . 2_755 | 0.84(4) | 2.45(4) | 2.993(3) | 123(3) ? |
| O13b | H13b1 | X1   | . . 2_744 | 0.86(4) | 2.23(4) | 3.079(4) | 173(4) ? |
| O13b | H13b1 | O3b  | . . .     | 0.86(4) | 2.46(4) | 2.918(3) | 114(3) ? |
| O13b | H13b1 | O7a  | . . 2_744 | 0.86(4) | 2.43(4) | 2.944(3) | 119(3) ? |
| O13b | H13b2 | O15b | . . .     | 0.85(4) | 1.93(4) | 2.697(3) | 150(4) ? |
| O14a | H14a1 | O3b  | . . 4_456 | 0.85(4) | 1.92(4) | 2.766(3) | 174(4) ? |
| O14a | H14a2 | O8b  | . . 4_455 | 0.81(3) | 1.96(3) | 2.775(3) | 177(4) ? |
| O14b | H14b1 | O8a  | . . 4_554 | 0.84(3) | 1.94(3) | 2.771(3) | 172(4) ? |
| O14b | H14b2 | O3a  | . . 4_553 | 0.87(3) | 1.96(4) | 2.812(3) | 165(3) ? |
| O15b | H15b1 | O14a | . . 2_644 | 0.84(3) | 2.44(3) | 3.155(4) | 144(4) ? |
| O15b | H15b2 | O2a  | . . 2_744 | 0.84(3) | 2.12(3) | 2.918(3) | 159(4) ? |
| K1   | Hala  | O7a  | . . 4_564 | 0.84(5) | 1.97(5) | 2.806(3) | 171(5) ? |
| Ow1  | Hala  | O7a  | . . 4_564 | 0.84(5) | 1.97(5) | 2.806(3) | 171(5) ? |

#=====

# 11. STRUCTURE-FACTOR LIST

loop\_

\_refln\_index\_h  
\_refln\_index\_k  
\_refln\_index\_l  
\_refln\_F\_squared\_calc  
\_refln\_F\_squared\_meas  
\_refln\_F\_squared\_sigma  
\_refln\_observed\_status  
? ? ? ? ? ? ?

loop\_

\_twin\_refln\_datum\_id  
\_twin\_refln\_individual\_id  
\_twin\_refln\_index\_h  
\_twin\_refln\_index\_k  
\_twin\_refln\_index\_l  
\_twin\_refln\_F\_squared\_calc  
\_twin\_refln\_F\_squared\_meas  
\_twin\_refln\_F\_squared\_sigma  
\_twin\_refln\_include\_status

|   |   |    |   |   |          |          |           |
|---|---|----|---|---|----------|----------|-----------|
| 1 | 2 | -1 | 0 | 0 | 75.55    | -47.77   | 3.18 <    |
| 1 | 1 | 1  | 0 | 0 | 75.55    | -47.77   | 3.18 <    |
| 2 | 2 | -2 | 0 | 0 | 57404.10 | 56092.90 | 3379.21 o |
| 2 | 1 | 2  | 0 | 0 | 57404.10 | 56092.90 | 3379.21 o |
| 3 | 2 | -4 | 0 | 0 | 1803.26  | 2325.00  | 98.73 o   |
| 3 | 1 | 4  | 0 | 0 | 1803.26  | 2325.00  | 98.73 o   |

|    |   |     |    |   |          |          |         |   |
|----|---|-----|----|---|----------|----------|---------|---|
| 4  | 2 | -5  | 0  | 0 | 784.20   | 592.40   | 25.48   | o |
| 4  | 1 | 5   | 0  | 0 | 784.20   | 592.40   | 25.48   | o |
| 5  | 2 | -7  | 0  | 0 | 42.20    | 47.77    | 3.18    | o |
| 5  | 1 | 7   | 0  | 0 | 42.20    | 47.77    | 3.18    | o |
| 6  | 2 | -8  | 0  | 0 | 6890.61  | 6127.80  | 369.45  | o |
| 6  | 1 | 8   | 0  | 0 | 6890.61  | 6127.80  | 369.45  | o |
| 7  | 2 | -2  | -1 | 0 | 16.10    | 19.11    | 3.18    | o |
| 7  | 1 | 2   | 1  | 0 | 16.10    | 19.11    | 3.18    | o |
| 8  | 2 | -4  | -1 | 0 | 1350.17  | 1410.92  | 50.96   | o |
| 8  | 1 | 4   | 1  | 0 | 1350.17  | 1410.92  | 50.96   | o |
| 9  | 2 | -5  | -1 | 0 | 359.25   | 414.04   | 15.92   | o |
| 9  | 1 | 5   | 1  | 0 | 359.25   | 414.04   | 15.92   | o |
| 10 | 2 | -6  | -1 | 0 | 216.83   | 207.02   | 9.55    | o |
| 10 | 1 | 6   | 1  | 0 | 216.83   | 207.02   | 9.55    | o |
| 11 | 2 | -7  | -1 | 0 | 0.22     | 3.18     | 3.18    | < |
| 11 | 1 | 7   | 1  | 0 | 0.22     | 3.18     | 3.18    | < |
| 12 | 2 | -8  | -1 | 0 | 1704.35  | 1407.74  | 60.51   | o |
| 12 | 1 | 8   | 1  | 0 | 1704.35  | 1407.74  | 60.51   | o |
| 13 | 2 | -9  | -1 | 0 | 36.09    | 28.66    | 3.18    | o |
| 13 | 1 | 9   | 1  | 0 | 36.09    | 28.66    | 3.18    | o |
| 14 | 2 | 0   | -2 | 0 | 28636.40 | 26606.90 | 1133.83 | o |
| 14 | 1 | 0   | 2  | 0 | 28636.40 | 26606.90 | 1133.83 | o |
| 15 | 2 | -1  | -2 | 0 | 16.87    | -31.85   | 3.18    | < |
| 15 | 1 | 1   | 2  | 0 | 16.87    | -31.85   | 3.18    | < |
| 16 | 2 | -2  | -2 | 0 | 14675.60 | 13055.00 | 455.45  | o |
| 16 | 1 | 2   | 2  | 0 | 14675.60 | 13055.00 | 455.45  | o |
| 17 | 2 | -3  | -2 | 0 | 13.34    | -47.77   | 3.18    | < |
| 17 | 1 | 3   | 2  | 0 | 13.34    | -47.77   | 3.18    | < |
| 18 | 2 | -4  | -2 | 0 | 9582.17  | 7459.10  | 318.49  | o |
| 18 | 1 | 4   | 2  | 0 | 9582.17  | 7459.10  | 318.49  | o |
| 19 | 2 | -5  | -2 | 0 | 0.74     | 6.37     | 12.74   | < |
| 19 | 1 | 5   | 2  | 0 | 0.74     | 6.37     | 12.74   | < |
| 20 | 2 | -6  | -2 | 0 | 404.88   | 442.70   | 19.11   | o |
| 20 | 1 | 6   | 2  | 0 | 404.88   | 442.70   | 19.11   | o |
| 21 | 2 | -7  | -2 | 0 | 94.35    | 85.99    | 6.37    | o |
| 21 | 1 | 7   | 2  | 0 | 94.35    | 85.99    | 6.37    | o |
| 22 | 2 | -8  | -2 | 0 | 9322.29  | 8650.26  | 369.45  | o |
| 22 | 1 | 8   | 2  | 0 | 9322.29  | 8650.26  | 369.45  | o |
| 23 | 2 | -9  | -2 | 0 | 7.95     | 12.74    | 6.37    | < |
| 23 | 1 | 9   | 2  | 0 | 7.95     | 12.74    | 6.37    | < |
| 24 | 2 | -10 | -2 | 0 | 4134.49  | 3783.69  | 162.43  | o |
| 24 | 1 | 10  | 2  | 0 | 4134.49  | 3783.69  | 162.43  | o |
| 25 | 2 | -1  | -3 | 0 | 135.72   | -79.62   | 6.37    | < |
| 25 | 1 | 1   | 3  | 0 | 135.72   | -79.62   | 6.37    | < |
| 26 | 2 | -3  | -3 | 0 | 14.74    | -22.29   | 3.18    | < |
| 26 | 1 | 3   | 3  | 0 | 14.74    | -22.29   | 3.18    | < |
| 27 | 2 | -4  | -3 | 0 | 929.71   | 1028.73  | 44.59   | o |
| 27 | 1 | 4   | 3  | 0 | 929.71   | 1028.73  | 44.59   | o |
| 28 | 2 | -5  | -3 | 0 | 210.85   | 187.91   | 9.55    | o |
| 28 | 1 | 5   | 3  | 0 | 210.85   | 187.91   | 9.55    | o |
| 29 | 2 | -6  | -3 | 0 | 116.95   | 108.29   | 6.37    | o |
| 29 | 1 | 6   | 3  | 0 | 116.95   | 108.29   | 6.37    | o |
| 30 | 2 | -7  | -3 | 0 | 2.69     | 3.18     | 3.18    | < |
| 30 | 1 | 7   | 3  | 0 | 2.69     | 3.18     | 3.18    | < |
| 31 | 2 | -8  | -3 | 0 | 46.68    | 50.96    | 6.37    | o |
| 31 | 1 | 8   | 3  | 0 | 46.68    | 50.96    | 6.37    | o |
| 32 | 2 | -9  | -3 | 0 | 52.28    | 47.77    | 6.37    | o |
| 32 | 1 | 9   | 3  | 0 | 52.28    | 47.77    | 6.37    | o |

|    |   |     |    |   |           |           |         |   |
|----|---|-----|----|---|-----------|-----------|---------|---|
| 33 | 2 | -10 | -3 | 0 | 66.45     | 54.14     | 6.37    | o |
| 33 | 1 | 10  | 3  | 0 | 66.45     | 54.14     | 6.37    | o |
| 34 | 2 | -11 | -3 | 0 | 132.39    | 143.32    | 6.37    | o |
| 34 | 1 | 11  | 3  | 0 | 132.39    | 143.32    | 6.37    | o |
| 35 | 2 | 0   | -4 | 0 | 31037.60  | 25645.00  | 1092.43 | o |
| 35 | 1 | 0   | 4  | 0 | 31037.60  | 25645.00  | 1092.43 | o |
| 36 | 2 | -2  | -4 | 0 | 31196.90  | 29269.50  | 882.22  | o |
| 36 | 1 | 2   | 4  | 0 | 31196.90  | 29269.50  | 882.22  | o |
| 37 | 2 | -3  | -4 | 0 | 10.48     | -38.22    | 3.18    | < |
| 37 | 1 | 3   | 4  | 0 | 10.48     | -38.22    | 3.18    | < |
| 38 | 2 | -5  | -4 | 0 | 333.35    | 283.46    | 12.74   | o |
| 38 | 1 | 5   | 4  | 0 | 333.35    | 283.46    | 12.74   | o |
| 39 | 2 | -6  | -4 | 0 | 116218.00 | 106026.00 | 4509.86 | o |
| 39 | 1 | 6   | 4  | 0 | 116218.00 | 106026.00 | 4509.86 | o |
| 40 | 2 | -7  | -4 | 0 | 164.84    | 146.51    | 9.55    | o |
| 40 | 1 | 7   | 4  | 0 | 164.84    | 146.51    | 9.55    | o |
| 41 | 2 | -8  | -4 | 0 | 9130.55   | 8503.76   | 363.08  | o |
| 41 | 1 | 8   | 4  | 0 | 9130.55   | 8503.76   | 363.08  | o |
| 42 | 2 | -9  | -4 | 0 | 221.30    | 242.05    | 12.74   | o |
| 42 | 1 | 9   | 4  | 0 | 221.30    | 242.05    | 12.74   | o |
| 43 | 2 | -10 | -4 | 0 | 132.53    | 175.17    | 12.74   | o |
| 43 | 1 | 10  | 4  | 0 | 132.53    | 175.17    | 12.74   | o |
| 44 | 2 | -11 | -4 | 0 | 122.22    | 124.21    | 9.55    | o |
| 44 | 1 | 11  | 4  | 0 | 122.22    | 124.21    | 9.55    | o |
| 45 | 2 | -12 | -4 | 0 | 3792.03   | 5277.42   | 455.45  | o |
| 45 | 1 | 12  | 4  | 0 | 3792.03   | 5277.42   | 455.45  | o |
| 46 | 2 | -1  | -5 | 0 | 739.42    | 799.42    | 25.48   | o |
| 46 | 1 | 1   | 5  | 0 | 739.42    | 799.42    | 25.48   | o |
| 47 | 2 | -3  | -5 | 0 | 844.07    | 917.26    | 28.66   | o |
| 47 | 1 | 3   | 5  | 0 | 844.07    | 917.26    | 28.66   | o |
| 48 | 2 | -4  | -5 | 0 | 4.04      | 12.74     | 3.18    | o |
| 48 | 1 | 4   | 5  | 0 | 4.04      | 12.74     | 3.18    | o |
| 49 | 2 | -6  | -5 | 0 | 1329.46   | 1385.44   | 60.51   | o |
| 49 | 1 | 6   | 5  | 0 | 1329.46   | 1385.44   | 60.51   | o |
| 50 | 2 | -7  | -5 | 0 | 154.18    | 133.77    | 6.37    | o |
| 50 | 1 | 7   | 5  | 0 | 154.18    | 133.77    | 6.37    | o |
| 51 | 2 | -8  | -5 | 0 | 147.64    | 127.40    | 9.55    | o |
| 51 | 1 | 8   | 5  | 0 | 147.64    | 127.40    | 9.55    | o |
| 52 | 2 | -9  | -5 | 0 | 25.15     | 22.29     | 6.37    | o |
| 52 | 1 | 9   | 5  | 0 | 25.15     | 22.29     | 6.37    | o |
| 53 | 2 | -10 | -5 | 0 | 3155.45   | 2901.47   | 181.54  | o |
| 53 | 1 | 10  | 5  | 0 | 3155.45   | 2901.47   | 181.54  | o |
| 54 | 2 | -11 | -5 | 0 | 13.79     | 19.11     | 3.18    | o |
| 54 | 1 | 11  | 5  | 0 | 13.79     | 19.11     | 3.18    | o |
| 55 | 2 | -12 | -5 | 0 | 248.34    | 245.24    | 12.74   | o |
| 55 | 1 | 12  | 5  | 0 | 248.34    | 245.24    | 12.74   | o |
| 56 | 2 | 0   | -6 | 0 | 44690.30  | 40833.90  | 1761.26 | o |
| 56 | 1 | 0   | 6  | 0 | 44690.30  | 40833.90  | 1761.26 | o |
| 57 | 2 | -1  | -6 | 0 | 5.05      | -9.55     | 3.18    | < |
| 57 | 1 | 1   | 6  | 0 | 5.05      | -9.55     | 3.18    | < |
| 58 | 2 | -2  | -6 | 0 | 197815.00 | 183172.00 | 5516.29 | o |
| 58 | 1 | 2   | 6  | 0 | 197815.00 | 183172.00 | 5516.29 | o |
| 59 | 2 | -3  | -6 | 0 | 89.34     | 76.44     | 3.18    | o |
| 59 | 1 | 3   | 6  | 0 | 89.34     | 76.44     | 3.18    | o |
| 60 | 2 | -4  | -6 | 0 | 32137.30  | 32763.30  | 987.33  | o |
| 60 | 1 | 4   | 6  | 0 | 32137.30  | 32763.30  | 987.33  | o |
| 61 | 2 | -5  | -6 | 0 | 35.28     | 31.85     | 3.18    | o |
| 61 | 1 | 5   | 6  | 0 | 35.28     | 31.85     | 3.18    | o |

|    |   |     |    |   |          |          |         |   |
|----|---|-----|----|---|----------|----------|---------|---|
| 62 | 2 | -6  | -6 | 0 | 25215.80 | 21004.60 | 802.60  | o |
| 62 | 1 | 6   | 6  | 0 | 25215.80 | 21004.60 | 802.60  | o |
| 63 | 2 | -7  | -6 | 0 | 416.25   | 289.83   | 22.29   | o |
| 63 | 1 | 7   | 6  | 0 | 416.25   | 289.83   | 22.29   | o |
| 64 | 2 | -9  | -6 | 0 | 0.47     | 6.37     | 3.18    | < |
| 64 | 1 | 9   | 6  | 0 | 0.47     | 6.37     | 3.18    | < |
| 65 | 2 | -10 | -6 | 0 | 26068.70 | 26651.50 | 1137.02 | o |
| 65 | 1 | 10  | 6  | 0 | 26068.70 | 26651.50 | 1137.02 | o |
| 66 | 2 | -11 | -6 | 0 | 212.98   | 207.02   | 12.74   | o |
| 66 | 1 | 11  | 6  | 0 | 212.98   | 207.02   | 12.74   | o |
| 67 | 2 | -12 | -6 | 0 | 873.89   | 968.22   | 54.14   | o |
| 67 | 1 | 12  | 6  | 0 | 873.89   | 968.22   | 54.14   | o |
| 68 | 2 | -13 | -6 | 0 | 12.43    | 19.11    | 3.18    | o |
| 68 | 1 | 13  | 6  | 0 | 12.43    | 19.11    | 3.18    | o |
| 69 | 2 | -1  | -7 | 0 | 18.69    | -9.55    | 3.18    | < |
| 69 | 1 | 1   | 7  | 0 | 18.69    | -9.55    | 3.18    | < |
| 70 | 2 | -2  | -7 | 0 | 3076.37  | 2939.69  | 89.18   | o |
| 70 | 1 | 2   | 7  | 0 | 3076.37  | 2939.69  | 89.18   | o |
| 71 | 2 | -3  | -7 | 0 | 118.30   | 108.29   | 22.29   | o |
| 71 | 1 | 3   | 7  | 0 | 118.30   | 108.29   | 22.29   | o |
| 72 | 2 | -4  | -7 | 0 | 13.78    | 15.92    | 3.18    | o |
| 72 | 1 | 4   | 7  | 0 | 13.78    | 15.92    | 3.18    | o |
| 73 | 2 | -5  | -7 | 0 | 37.05    | 35.03    | 3.18    | o |
| 73 | 1 | 5   | 7  | 0 | 37.05    | 35.03    | 3.18    | o |
| 74 | 2 | -6  | -7 | 0 | 85.51    | 70.07    | 3.18    | o |
| 74 | 1 | 6   | 7  | 0 | 85.51    | 70.07    | 3.18    | o |
| 75 | 2 | -7  | -7 | 0 | 8.82     | 6.37     | 3.18    | < |
| 75 | 1 | 7   | 7  | 0 | 8.82     | 6.37     | 3.18    | < |
| 76 | 2 | -8  | -7 | 0 | 102.70   | 63.70    | 9.55    | o |
| 76 | 1 | 8   | 7  | 0 | 102.70   | 63.70    | 9.55    | o |
| 77 | 2 | -9  | -7 | 0 | 24.85    | 19.11    | 6.37    | o |
| 77 | 1 | 9   | 7  | 0 | 24.85    | 19.11    | 6.37    | o |
| 78 | 2 | -10 | -7 | 0 | 1407.42  | 1471.44  | 70.07   | o |
| 78 | 1 | 10  | 7  | 0 | 1407.42  | 1471.44  | 70.07   | o |
| 79 | 2 | -11 | -7 | 0 | 23.18    | 22.29    | 3.18    | o |
| 79 | 1 | 11  | 7  | 0 | 23.18    | 22.29    | 3.18    | o |
| 80 | 2 | -12 | -7 | 0 | 663.10   | 793.05   | 54.14   | o |
| 80 | 1 | 12  | 7  | 0 | 663.10   | 793.05   | 54.14   | o |
| 81 | 2 | -13 | -7 | 0 | 9.25     | 12.74    | 3.18    | o |
| 81 | 1 | 13  | 7  | 0 | 9.25     | 12.74    | 3.18    | o |
| 82 | 2 | 0   | -8 | 0 | 15522.40 | 12599.60 | 541.44  | o |
| 82 | 1 | 0   | 8  | 0 | 15522.40 | 12599.60 | 541.44  | o |
| 83 | 2 | -1  | -8 | 0 | 62.73    | 79.62    | 6.37    | o |
| 83 | 1 | 1   | 8  | 0 | 62.73    | 79.62    | 6.37    | o |
| 84 | 2 | -3  | -8 | 0 | 37.76    | -60.51   | 3.18    | < |
| 84 | 1 | 3   | 8  | 0 | 37.76    | -60.51   | 3.18    | < |
| 85 | 2 | -4  | -8 | 0 | 9153.67  | 8223.48  | 248.42  | o |
| 85 | 1 | 4   | 8  | 0 | 9153.67  | 8223.48  | 248.42  | o |
| 86 | 2 | -5  | -8 | 0 | 51.71    | 57.33    | 3.18    | o |
| 86 | 1 | 5   | 8  | 0 | 51.71    | 57.33    | 3.18    | o |
| 87 | 2 | -6  | -8 | 0 | 36214.70 | 31820.60 | 1111.54 | o |
| 87 | 1 | 6   | 8  | 0 | 36214.70 | 31820.60 | 1111.54 | o |
| 88 | 2 | -7  | -8 | 0 | 55.80    | 47.77    | 3.18    | o |
| 88 | 1 | 7   | 8  | 0 | 55.80    | 47.77    | 3.18    | o |
| 89 | 2 | -8  | -8 | 0 | 12452.80 | 12510.40 | 535.07  | o |
| 89 | 1 | 8   | 8  | 0 | 12452.80 | 12510.40 | 535.07  | o |
| 90 | 2 | -9  | -8 | 0 | 117.46   | 82.81    | 28.66   | < |
| 90 | 1 | 9   | 8  | 0 | 117.46   | 82.81    | 28.66   | < |

|     |   |     |     |   |          |          |         |   |
|-----|---|-----|-----|---|----------|----------|---------|---|
| 91  | 2 | -10 | -8  | 0 | 217.34   | 296.20   | 19.11   | o |
| 91  | 1 | 10  | 8   | 0 | 217.34   | 296.20   | 19.11   | o |
| 92  | 2 | -11 | -8  | 0 | 12.07    | 6.37     | 3.18    | < |
| 92  | 1 | 11  | 8   | 0 | 12.07    | 6.37     | 3.18    | < |
| 93  | 2 | -12 | -8  | 0 | 6832.52  | 8592.93  | 375.82  | o |
| 93  | 1 | 12  | 8   | 0 | 6832.52  | 8592.93  | 375.82  | o |
| 94  | 2 | -13 | -8  | 0 | 25.07    | 25.48    | 6.37    | o |
| 94  | 1 | 13  | 8   | 0 | 25.07    | 25.48    | 6.37    | o |
| 95  | 2 | -1  | -9  | 0 | 413.39   | 519.14   | 19.11   | o |
| 95  | 1 | 1   | 9   | 0 | 413.39   | 519.14   | 19.11   | o |
| 96  | 2 | -2  | -9  | 0 | 1155.87  | 1321.74  | 41.40   | o |
| 96  | 1 | 2   | 9   | 0 | 1155.87  | 1321.74  | 41.40   | o |
| 97  | 2 | -3  | -9  | 0 | 415.12   | 515.96   | 19.11   | o |
| 97  | 1 | 3   | 9   | 0 | 415.12   | 515.96   | 19.11   | o |
| 98  | 2 | -4  | -9  | 0 | 2466.90  | 2560.68  | 79.62   | o |
| 98  | 1 | 4   | 9   | 0 | 2466.90  | 2560.68  | 79.62   | o |
| 99  | 2 | -5  | -9  | 0 | 23.04    | 31.85    | 3.18    | o |
| 99  | 1 | 5   | 9   | 0 | 23.04    | 31.85    | 3.18    | o |
| 100 | 2 | -6  | -9  | 0 | 824.67   | 828.08   | 28.66   | o |
| 100 | 1 | 6   | 9   | 0 | 824.67   | 828.08   | 28.66   | o |
| 101 | 2 | -7  | -9  | 0 | 124.89   | 130.58   | 6.37    | o |
| 101 | 1 | 7   | 9   | 0 | 124.89   | 130.58   | 6.37    | o |
| 102 | 2 | -8  | -9  | 0 | 632.26   | 598.77   | 28.66   | o |
| 102 | 1 | 8   | 9   | 0 | 632.26   | 598.77   | 28.66   | o |
| 103 | 2 | -9  | -9  | 0 | 100.75   | 105.10   | 9.55    | o |
| 103 | 1 | 9   | 9   | 0 | 100.75   | 105.10   | 9.55    | o |
| 104 | 2 | -10 | -9  | 0 | 5.40     | 6.37     | 3.18    | < |
| 104 | 1 | 10  | 9   | 0 | 5.40     | 6.37     | 3.18    | < |
| 105 | 2 | -11 | -9  | 0 | 224.75   | 251.61   | 19.11   | o |
| 105 | 1 | 11  | 9   | 0 | 224.75   | 251.61   | 19.11   | o |
| 106 | 2 | -12 | -9  | 0 | 525.94   | 570.10   | 35.03   | o |
| 106 | 1 | 12  | 9   | 0 | 525.94   | 570.10   | 35.03   | o |
| 107 | 2 | -13 | -9  | 0 | 0.76     | 3.18     | 3.18    | < |
| 107 | 1 | 13  | 9   | 0 | 0.76     | 3.18     | 3.18    | < |
| 108 | 2 | -1  | -10 | 0 | 34.02    | 38.22    | 3.18    | o |
| 108 | 1 | 1   | 10  | 0 | 34.02    | 38.22    | 3.18    | o |
| 109 | 2 | -2  | -10 | 0 | 3717.34  | 3637.19  | 111.47  | o |
| 109 | 1 | 2   | 10  | 0 | 3717.34  | 3637.19  | 111.47  | o |
| 110 | 2 | -3  | -10 | 0 | 47.15    | 70.07    | 6.37    | o |
| 110 | 1 | 3   | 10  | 0 | 47.15    | 70.07    | 6.37    | o |
| 111 | 2 | -4  | -10 | 0 | 65420.30 | 63475.60 | 1914.14 | o |
| 111 | 1 | 4   | 10  | 0 | 65420.30 | 63475.60 | 1914.14 | o |
| 112 | 2 | -5  | -10 | 0 | 20.94    | 28.66    | 3.18    | o |
| 112 | 1 | 5   | 10  | 0 | 20.94    | 28.66    | 3.18    | o |
| 113 | 2 | -6  | -10 | 0 | 5249.95  | 5474.89  | 165.62  | o |
| 113 | 1 | 6   | 10  | 0 | 5249.95  | 5474.89  | 165.62  | o |
| 114 | 2 | -7  | -10 | 0 | 427.86   | 442.70   | 15.92   | o |
| 114 | 1 | 7   | 10  | 0 | 427.86   | 442.70   | 15.92   | o |
| 115 | 2 | -8  | -10 | 0 | 2978.54  | 2646.67  | 108.29  | o |
| 115 | 1 | 8   | 10  | 0 | 2978.54  | 2646.67  | 108.29  | o |
| 116 | 2 | -9  | -10 | 0 | 125.60   | 162.43   | 9.55    | o |
| 116 | 1 | 9   | 10  | 0 | 125.60   | 162.43   | 9.55    | o |
| 117 | 2 | -10 | -10 | 0 | 7864.51  | 8615.23  | 369.45  | o |
| 117 | 1 | 10  | 10  | 0 | 7864.51  | 8615.23  | 369.45  | o |
| 118 | 2 | -11 | -10 | 0 | 103.65   | 117.84   | 9.55    | o |
| 118 | 1 | 11  | 10  | 0 | 103.65   | 117.84   | 9.55    | o |
| 119 | 2 | -12 | -10 | 0 | 1401.62  | 1624.31  | 85.99   | o |
| 119 | 1 | 12  | 10  | 0 | 1401.62  | 1624.31  | 85.99   | o |



|     |   |     |     |   |           |           |          |   |
|-----|---|-----|-----|---|-----------|-----------|----------|---|
| 120 | 2 | -13 | -10 | 0 | 32.61     | 35.03     | 6.37     | o |
| 120 | 1 | 13  | 10  | 0 | 32.61     | 35.03     | 6.37     | o |
| 121 | 2 | -1  | -11 | 0 | 301.20    | 328.05    | 12.74    | o |
| 121 | 1 | 1   | 11  | 0 | 301.20    | 328.05    | 12.74    | o |
| 122 | 2 | -2  | -11 | 0 | 209.32    | 232.50    | 9.55     | o |
| 122 | 1 | 2   | 11  | 0 | 209.32    | 232.50    | 9.55     | o |
| 123 | 2 | -3  | -11 | 0 | 7.84      | 12.74     | 3.18     | o |
| 123 | 1 | 3   | 11  | 0 | 7.84      | 12.74     | 3.18     | o |
| 124 | 2 | -4  | -11 | 0 | 53.08     | 35.03     | 3.18     | o |
| 124 | 1 | 4   | 11  | 0 | 53.08     | 35.03     | 3.18     | o |
| 125 | 2 | -5  | -11 | 0 | 55.67     | 47.77     | 3.18     | o |
| 125 | 1 | 5   | 11  | 0 | 55.67     | 47.77     | 3.18     | o |
| 126 | 2 | -6  | -11 | 0 | 553.57    | 544.62    | 19.11    | o |
| 126 | 1 | 6   | 11  | 0 | 553.57    | 544.62    | 19.11    | o |
| 127 | 2 | -7  | -11 | 0 | 6.88      | 12.74     | 3.18     | o |
| 127 | 1 | 7   | 11  | 0 | 6.88      | 12.74     | 3.18     | o |
| 128 | 2 | -8  | -11 | 0 | 2624.21   | 2509.72   | 76.44    | o |
| 128 | 1 | 8   | 11  | 0 | 2624.21   | 2509.72   | 76.44    | o |
| 129 | 2 | -9  | -11 | 0 | 42.72     | 54.14     | 6.37     | o |
| 129 | 1 | 9   | 11  | 0 | 42.72     | 54.14     | 6.37     | o |
| 130 | 2 | -10 | -11 | 0 | 510.16    | 480.92    | 589.21   | < |
| 130 | 1 | 10  | 11  | 0 | 510.16    | 480.92    | 589.21   | < |
| 131 | 2 | -11 | -11 | 0 | 42.09     | 47.77     | 6.37     | o |
| 131 | 1 | 11  | 11  | 0 | 42.09     | 47.77     | 6.37     | o |
| 132 | 2 | -12 | -11 | 0 | 99.03     | 114.66    | 15.92    | o |
| 132 | 1 | 12  | 11  | 0 | 99.03     | 114.66    | 15.92    | o |
| 133 | 2 | -13 | -11 | 0 | 0.96      | -3.18     | 9.55     | < |
| 133 | 1 | 13  | 11  | 0 | 0.96      | -3.18     | 9.55     | < |
| 134 | 2 | 0   | -12 | 0 | 331068.00 | 306600.00 | 13045.50 | o |
| 134 | 1 | 0   | 12  | 0 | 331068.00 | 306600.00 | 13045.50 | o |
| 135 | 2 | -1  | -12 | 0 | 0.85      | 3.18      | 3.18     | < |
| 135 | 1 | 1   | 12  | 0 | 0.85      | 3.18      | 3.18     | < |
| 136 | 2 | -2  | -12 | 0 | 52623.40  | 51484.30  | 1551.06  | o |
| 136 | 1 | 2   | 12  | 0 | 52623.40  | 51484.30  | 1551.06  | o |
| 137 | 2 | -3  | -12 | 0 | 9.43      | 9.55      | 3.18     | o |
| 137 | 1 | 3   | 12  | 0 | 9.43      | 9.55      | 3.18     | o |
| 138 | 2 | -4  | -12 | 0 | 1861.91   | 1901.40   | 60.51    | o |
| 138 | 1 | 4   | 12  | 0 | 1861.91   | 1901.40   | 60.51    | o |
| 139 | 2 | -5  | -12 | 0 | 6.65      | 9.55      | 3.18     | o |
| 139 | 1 | 5   | 12  | 0 | 6.65      | 9.55      | 3.18     | o |
| 140 | 2 | -6  | -12 | 0 | 2299.57   | 2519.28   | 79.62    | o |
| 140 | 1 | 6   | 12  | 0 | 2299.57   | 2519.28   | 79.62    | o |
| 141 | 2 | -7  | -12 | 0 | 35.28     | 41.40     | 3.18     | o |
| 141 | 1 | 7   | 12  | 0 | 35.28     | 41.40     | 3.18     | o |
| 142 | 2 | -8  | -12 | 0 | 2399.46   | 2108.42   | 66.88    | o |
| 142 | 1 | 8   | 12  | 0 | 2399.46   | 2108.42   | 66.88    | o |
| 143 | 2 | -9  | -12 | 0 | 37.92     | 44.59     | 6.37     | o |
| 143 | 1 | 9   | 12  | 0 | 37.92     | 44.59     | 6.37     | o |
| 144 | 2 | -10 | -12 | 0 | 8724.84   | 10398.80  | 633.80   | o |
| 144 | 1 | 10  | 12  | 0 | 8724.84   | 10398.80  | 633.80   | o |
| 145 | 2 | -11 | -12 | 0 | 19.01     | 44.59     | 6.37     | o |
| 145 | 1 | 11  | 12  | 0 | 19.01     | 44.59     | 6.37     | o |
| 146 | 2 | -12 | -12 | 0 | 12822.10  | 16650.80  | 1216.64  | o |
| 146 | 1 | 12  | 12  | 0 | 12822.10  | 16650.80  | 1216.64  | o |
| 147 | 2 | -1  | -13 | 0 | 94.55     | 95.55     | 6.37     | o |
| 147 | 1 | 1   | 13  | 0 | 94.55     | 95.55     | 6.37     | o |
| 148 | 2 | -2  | -13 | 0 | 976.40    | 1031.92   | 35.03    | o |
| 148 | 1 | 2   | 13  | 0 | 976.40    | 1031.92   | 35.03    | o |

|     |   |     |     |   |          |          |        |   |
|-----|---|-----|-----|---|----------|----------|--------|---|
| 149 | 2 | -4  | -13 | 0 | 43.04    | 35.03    | 3.18   | o |
| 149 | 1 | 4   | 13  | 0 | 43.04    | 35.03    | 3.18   | o |
| 150 | 2 | -6  | -13 | 0 | 427.25   | 388.56   | 15.92  | o |
| 150 | 1 | 6   | 13  | 0 | 427.25   | 388.56   | 15.92  | o |
| 151 | 2 | -7  | -13 | 0 | 38.24    | 41.40    | 3.18   | o |
| 151 | 1 | 7   | 13  | 0 | 38.24    | 41.40    | 3.18   | o |
| 152 | 2 | -8  | -13 | 0 | 256.49   | 242.05   | 9.55   | o |
| 152 | 1 | 8   | 13  | 0 | 256.49   | 242.05   | 9.55   | o |
| 153 | 2 | -9  | -13 | 0 | 22.89    | 28.66    | 6.37   | o |
| 153 | 1 | 9   | 13  | 0 | 22.89    | 28.66    | 6.37   | o |
| 154 | 2 | -10 | -13 | 0 | 1270.55  | 1328.11  | 63.70  | o |
| 154 | 1 | 10  | 13  | 0 | 1270.55  | 1328.11  | 63.70  | o |
| 155 | 2 | -11 | -13 | 0 | 5.24     | 3.18     | 3.18   | < |
| 155 | 1 | 11  | 13  | 0 | 5.24     | 3.18     | 3.18   | < |
| 156 | 2 | -12 | -13 | 0 | 786.32   | 990.51   | 50.96  | o |
| 156 | 1 | 12  | 13  | 0 | 786.32   | 990.51   | 50.96  | o |
| 157 | 2 | 0   | -14 | 0 | 17837.10 | 18326.10 | 783.49 | o |
| 157 | 1 | 0   | 14  | 0 | 17837.10 | 18326.10 | 783.49 | o |
| 158 | 2 | -1  | -14 | 0 | 2.73     | 12.74    | 3.18   | o |
| 158 | 1 | 1   | 14  | 0 | 2.73     | 12.74    | 3.18   | o |
| 159 | 2 | -2  | -14 | 0 | 30526.10 | 29909.70 | 904.52 | o |
| 159 | 1 | 2   | 14  | 0 | 30526.10 | 29909.70 | 904.52 | o |
| 160 | 2 | -3  | -14 | 0 | 158.60   | 175.17   | 9.55   | o |
| 160 | 1 | 3   | 14  | 0 | 158.60   | 175.17   | 9.55   | o |
| 161 | 2 | -4  | -14 | 0 | 28.44    | 28.66    | 3.18   | o |
| 161 | 1 | 4   | 14  | 0 | 28.44    | 28.66    | 3.18   | o |
| 162 | 2 | -5  | -14 | 0 | 157.26   | 171.99   | 9.55   | o |
| 162 | 1 | 5   | 14  | 0 | 157.26   | 171.99   | 9.55   | o |
| 163 | 2 | -7  | -14 | 0 | 142.10   | 146.51   | 9.55   | o |
| 163 | 1 | 7   | 14  | 0 | 142.10   | 146.51   | 9.55   | o |
| 164 | 2 | -8  | -14 | 0 | 2139.95  | 2153.01  | 66.88  | o |
| 164 | 1 | 8   | 14  | 0 | 2139.95  | 2153.01  | 66.88  | o |
| 165 | 2 | -9  | -14 | 0 | 52.30    | 50.96    | 3.18   | o |
| 165 | 1 | 9   | 14  | 0 | 52.30    | 50.96    | 3.18   | o |
| 166 | 2 | -10 | -14 | 0 | 5225.72  | 5787.01  | 251.61 | o |
| 166 | 1 | 10  | 14  | 0 | 5225.72  | 5787.01  | 251.61 | o |
| 167 | 2 | -11 | -14 | 0 | 137.24   | 184.73   | 35.03  | o |
| 167 | 1 | 11  | 14  | 0 | 137.24   | 184.73   | 35.03  | o |
| 168 | 2 | -12 | -14 | 0 | 839.68   | 923.63   | 60.51  | o |
| 168 | 1 | 12  | 14  | 0 | 839.68   | 923.63   | 60.51  | o |
| 169 | 2 | -1  | -15 | 0 | 114.13   | 133.77   | 6.37   | o |
| 169 | 1 | 1   | 15  | 0 | 114.13   | 133.77   | 6.37   | o |
| 170 | 2 | -2  | -15 | 0 | 4063.17  | 4159.52  | 127.40 | o |
| 170 | 1 | 2   | 15  | 0 | 4063.17  | 4159.52  | 127.40 | o |
| 171 | 2 | -3  | -15 | 0 | 28.37    | 41.40    | 3.18   | o |
| 171 | 1 | 3   | 15  | 0 | 28.37    | 41.40    | 3.18   | o |
| 172 | 2 | -4  | -15 | 0 | 11.50    | 19.11    | 3.18   | o |
| 172 | 1 | 4   | 15  | 0 | 11.50    | 19.11    | 3.18   | o |
| 173 | 2 | -5  | -15 | 0 | 193.19   | 229.32   | 9.55   | o |
| 173 | 1 | 5   | 15  | 0 | 193.19   | 229.32   | 9.55   | o |
| 174 | 2 | -6  | -15 | 0 | 63.82    | 95.55    | 6.37   | o |
| 174 | 1 | 6   | 15  | 0 | 63.82    | 95.55    | 6.37   | o |
| 175 | 2 | -7  | -15 | 0 | 41.37    | 44.59    | 3.18   | o |
| 175 | 1 | 7   | 15  | 0 | 41.37    | 44.59    | 3.18   | o |
| 176 | 2 | -8  | -15 | 0 | 15.39    | 12.74    | 3.18   | o |
| 176 | 1 | 8   | 15  | 0 | 15.39    | 12.74    | 3.18   | o |
| 177 | 2 | -9  | -15 | 0 | 12.04    | 15.92    | 3.18   | o |
| 177 | 1 | 9   | 15  | 0 | 12.04    | 15.92    | 3.18   | o |

|     |   |     |     |   |          |          |         |   |
|-----|---|-----|-----|---|----------|----------|---------|---|
| 178 | 2 | -10 | -15 | 0 | 65.14    | 70.07    | 6.37    | o |
| 178 | 1 | 10  | 15  | 0 | 65.14    | 70.07    | 6.37    | o |
| 179 | 2 | -11 | -15 | 0 | 5.87     | 6.37     | 3.18    | < |
| 179 | 1 | 11  | 15  | 0 | 5.87     | 6.37     | 3.18    | < |
| 180 | 2 | -12 | -15 | 0 | 35.37    | 47.77    | 9.55    | o |
| 180 | 1 | 12  | 15  | 0 | 35.37    | 47.77    | 9.55    | o |
| 181 | 2 | 0   | -16 | 0 | 55187.10 | 56054.70 | 2388.70 | o |
| 181 | 1 | 0   | 16  | 0 | 55187.10 | 56054.70 | 2388.70 | o |
| 182 | 2 | -1  | -16 | 0 | 6.17     | 12.74    | 3.18    | o |
| 182 | 1 | 1   | 16  | 0 | 6.17     | 12.74    | 3.18    | o |
| 183 | 2 | -2  | -16 | 0 | 1786.80  | 1748.53  | 63.70   | o |
| 183 | 1 | 2   | 16  | 0 | 1786.80  | 1748.53  | 63.70   | o |
| 184 | 2 | -3  | -16 | 0 | 1.31     | 3.18     | 3.18    | < |
| 184 | 1 | 3   | 16  | 0 | 1.31     | 3.18     | 3.18    | < |
| 185 | 2 | -4  | -16 | 0 | 4875.13  | 4901.60  | 175.17  | o |
| 185 | 1 | 4   | 16  | 0 | 4875.13  | 4901.60  | 175.17  | o |
| 186 | 2 | -5  | -16 | 0 | 24.13    | 35.03    | 3.18    | o |
| 186 | 1 | 5   | 16  | 0 | 24.13    | 35.03    | 3.18    | o |
| 187 | 2 | -6  | -16 | 0 | 51563.10 | 52959.00 | 1856.81 | o |
| 187 | 1 | 6   | 16  | 0 | 51563.10 | 52959.00 | 1856.81 | o |
| 188 | 2 | -7  | -16 | 0 | 14.23    | 19.11    | 3.18    | o |
| 188 | 1 | 7   | 16  | 0 | 14.23    | 19.11    | 3.18    | o |
| 189 | 2 | -8  | -16 | 0 | 5023.22  | 5159.58  | 159.25  | o |
| 189 | 1 | 8   | 16  | 0 | 5023.22  | 5159.58  | 159.25  | o |
| 190 | 2 | -9  | -16 | 0 | 61.42    | 73.25    | 6.37    | o |
| 190 | 1 | 9   | 16  | 0 | 61.42    | 73.25    | 6.37    | o |
| 191 | 2 | -10 | -16 | 0 | 613.66   | 668.84   | 379.01  | < |
| 191 | 1 | 10  | 16  | 0 | 613.66   | 668.84   | 379.01  | < |
| 192 | 2 | -11 | -16 | 0 | 21.55    | 22.29    | 6.37    | o |
| 192 | 1 | 11  | 16  | 0 | 21.55    | 22.29    | 6.37    | o |
| 193 | 2 | -12 | -16 | 0 | 844.37   | 1012.81  | 111.47  | o |
| 193 | 1 | 12  | 16  | 0 | 844.37   | 1012.81  | 111.47  | o |
| 194 | 2 | -1  | -17 | 0 | 22.56    | 35.03    | 3.18    | o |
| 194 | 1 | 1   | 17  | 0 | 22.56    | 35.03    | 3.18    | o |
| 195 | 2 | -2  | -17 | 0 | 910.97   | 1063.77  | 41.40   | o |
| 195 | 1 | 2   | 17  | 0 | 910.97   | 1063.77  | 41.40   | o |
| 196 | 2 | -3  | -17 | 0 | 1.56     | 6.37     | 3.18    | < |
| 196 | 1 | 3   | 17  | 0 | 1.56     | 6.37     | 3.18    | < |
| 197 | 2 | -5  | -17 | 0 | 47.98    | 41.40    | 3.18    | o |
| 197 | 1 | 5   | 17  | 0 | 47.98    | 41.40    | 3.18    | o |
| 198 | 2 | -6  | -17 | 0 | 446.86   | 414.04   | 15.92   | o |
| 198 | 1 | 6   | 17  | 0 | 446.86   | 414.04   | 15.92   | o |
| 199 | 2 | -7  | -17 | 0 | 1.25     | 3.18     | 6.37    | < |
| 199 | 1 | 7   | 17  | 0 | 1.25     | 3.18     | 6.37    | < |
| 200 | 2 | -8  | -17 | 0 | 31.35    | 35.03    | 3.18    | o |
| 200 | 1 | 8   | 17  | 0 | 31.35    | 35.03    | 3.18    | o |
| 201 | 2 | -9  | -17 | 0 | 17.57    | 22.29    | 3.18    | o |
| 201 | 1 | 9   | 17  | 0 | 17.57    | 22.29    | 3.18    | o |
| 202 | 2 | -10 | -17 | 0 | 368.66   | 372.64   | 455.45  | < |
| 202 | 1 | 10  | 17  | 0 | 368.66   | 372.64   | 455.45  | < |
| 203 | 2 | -11 | -17 | 0 | 44.05    | 54.14    | 6.37    | o |
| 203 | 1 | 11  | 17  | 0 | 44.05    | 54.14    | 6.37    | o |
| 204 | 2 | -12 | -17 | 0 | 142.13   | 165.62   | 15.92   | o |
| 204 | 1 | 12  | 17  | 0 | 142.13   | 165.62   | 15.92   | o |
| 205 | 2 | 0   | -18 | 0 | 3629.48  | 4006.64  | 248.42  | o |
| 205 | 1 | 0   | 18  | 0 | 3629.48  | 4006.64  | 248.42  | o |
| 206 | 2 | -1  | -18 | 0 | 1.32     | 3.18     | 3.18    | < |
| 206 | 1 | 1   | 18  | 0 | 1.32     | 3.18     | 3.18    | < |

|     |   |     |     |   |          |          |         |   |
|-----|---|-----|-----|---|----------|----------|---------|---|
| 207 | 2 | -2  | -18 | 0 | 5038.70  | 5064.03  | 156.06  | o |
| 207 | 1 | 2   | 18  | 0 | 5038.70  | 5064.03  | 156.06  | o |
| 208 | 2 | -3  | -18 | 0 | 72.82    | 95.55    | 6.37    | o |
| 208 | 1 | 3   | 18  | 0 | 72.82    | 95.55    | 6.37    | o |
| 209 | 2 | -4  | -18 | 0 | 7222.97  | 8239.41  | 251.61  | o |
| 209 | 1 | 4   | 18  | 0 | 7222.97  | 8239.41  | 251.61  | o |
| 210 | 2 | -5  | -18 | 0 | 109.74   | 114.66   | 6.37    | o |
| 210 | 1 | 5   | 18  | 0 | 109.74   | 114.66   | 6.37    | o |
| 211 | 2 | -6  | -18 | 0 | 3076.58  | 3318.69  | 105.10  | o |
| 211 | 1 | 6   | 18  | 0 | 3076.58  | 3318.69  | 105.10  | o |
| 212 | 2 | -7  | -18 | 0 | 44.91    | 47.77    | 3.18    | o |
| 212 | 1 | 7   | 18  | 0 | 44.91    | 47.77    | 3.18    | o |
| 213 | 2 | -8  | -18 | 0 | 1640.30  | 1544.69  | 63.70   | o |
| 213 | 1 | 8   | 18  | 0 | 1640.30  | 1544.69  | 63.70   | o |
| 214 | 2 | -9  | -18 | 0 | 90.91    | 108.29   | 9.55    | o |
| 214 | 1 | 9   | 18  | 0 | 90.91    | 108.29   | 9.55    | o |
| 215 | 2 | -10 | -18 | 0 | 2690.12  | 2496.98  | 111.47  | o |
| 215 | 1 | 10  | 18  | 0 | 2690.12  | 2496.98  | 111.47  | o |
| 216 | 2 | -11 | -18 | 0 | 11.35    | 15.92    | 6.37    | < |
| 216 | 1 | 11  | 18  | 0 | 11.35    | 15.92    | 6.37    | < |
| 217 | 2 | -12 | -18 | 0 | 265.89   | 359.90   | 22.29   | o |
| 217 | 1 | 12  | 18  | 0 | 265.89   | 359.90   | 22.29   | o |
| 218 | 2 | -1  | -19 | 0 | 214.33   | 270.72   | 12.74   | o |
| 218 | 1 | 1   | 19  | 0 | 214.33   | 270.72   | 12.74   | o |
| 219 | 2 | -2  | -19 | 0 | 224.15   | 267.53   | 12.74   | o |
| 219 | 1 | 2   | 19  | 0 | 224.15   | 267.53   | 12.74   | o |
| 220 | 2 | -3  | -19 | 0 | 90.13    | 121.03   | 9.55    | o |
| 220 | 1 | 3   | 19  | 0 | 90.13    | 121.03   | 9.55    | o |
| 221 | 2 | -4  | -19 | 0 | 112.40   | 133.77   | 6.37    | o |
| 221 | 1 | 4   | 19  | 0 | 112.40   | 133.77   | 6.37    | o |
| 222 | 2 | -5  | -19 | 0 | 131.49   | 171.99   | 9.55    | o |
| 222 | 1 | 5   | 19  | 0 | 131.49   | 171.99   | 9.55    | o |
| 223 | 2 | -6  | -19 | 0 | 201.49   | 200.65   | 9.55    | o |
| 223 | 1 | 6   | 19  | 0 | 201.49   | 200.65   | 9.55    | o |
| 224 | 2 | -7  | -19 | 0 | 0.71     | 0.00     | 3.18    | < |
| 224 | 1 | 7   | 19  | 0 | 0.71     | 0.00     | 3.18    | < |
| 225 | 2 | -8  | -19 | 0 | 1373.94  | 1401.37  | 85.99   | o |
| 225 | 1 | 8   | 19  | 0 | 1373.94  | 1401.37  | 85.99   | o |
| 226 | 2 | -9  | -19 | 0 | 5.30     | 3.18     | 3.18    | < |
| 226 | 1 | 9   | 19  | 0 | 5.30     | 3.18     | 3.18    | < |
| 227 | 2 | -10 | -19 | 0 | 1.61     | 6.37     | 3.18    | < |
| 227 | 1 | 10  | 19  | 0 | 1.61     | 6.37     | 3.18    | < |
| 228 | 2 | -11 | -19 | 0 | 31.87    | 47.77    | 6.37    | o |
| 228 | 1 | 11  | 19  | 0 | 31.87    | 47.77    | 6.37    | o |
| 229 | 2 | -12 | -19 | 0 | 670.59   | 850.38   | 156.06  | o |
| 229 | 1 | 12  | 19  | 0 | 670.59   | 850.38   | 156.06  | o |
| 230 | 2 | 0   | -20 | 0 | 48873.70 | 51083.00 | 2178.49 | o |
| 230 | 1 | 0   | 20  | 0 | 48873.70 | 51083.00 | 2178.49 | o |
| 231 | 2 | -1  | -20 | 0 | 24.63    | 35.03    | 3.18    | o |
| 231 | 1 | 1   | 20  | 0 | 24.63    | 35.03    | 3.18    | o |
| 232 | 2 | -2  | -20 | 0 | 1894.04  | 2038.35  | 76.44   | o |
| 232 | 1 | 2   | 20  | 0 | 1894.04  | 2038.35  | 76.44   | o |
| 233 | 2 | -3  | -20 | 0 | 31.25    | 44.59    | 3.18    | o |
| 233 | 1 | 3   | 20  | 0 | 31.25    | 44.59    | 3.18    | o |
| 234 | 2 | -5  | -20 | 0 | 132.26   | 178.36   | 12.74   | o |
| 234 | 1 | 5   | 20  | 0 | 132.26   | 178.36   | 12.74   | o |
| 235 | 2 | -6  | -20 | 0 | 6603.79  | 7153.35  | 235.68  | o |
| 235 | 1 | 6   | 20  | 0 | 6603.79  | 7153.35  | 235.68  | o |

|     |   |     |     |   |          |          |        |   |
|-----|---|-----|-----|---|----------|----------|--------|---|
| 236 | 2 | -7  | -20 | 0 | 20.42    | 19.11    | 3.18   | o |
| 236 | 1 | 7   | 20  | 0 | 20.42    | 19.11    | 3.18   | o |
| 237 | 2 | -8  | -20 | 0 | 3505.10  | 3576.67  | 130.58 | o |
| 237 | 1 | 8   | 20  | 0 | 3505.10  | 3576.67  | 130.58 | o |
| 238 | 2 | -9  | -20 | 0 | 69.66    | 63.70    | 6.37   | o |
| 238 | 1 | 9   | 20  | 0 | 69.66    | 63.70    | 6.37   | o |
| 239 | 2 | -10 | -20 | 0 | 867.08   | 1028.73  | 50.96  | o |
| 239 | 1 | 10  | 20  | 0 | 867.08   | 1028.73  | 50.96  | o |
| 240 | 2 | -11 | -20 | 0 | 7.44     | 12.74    | 6.37   | < |
| 240 | 1 | 11  | 20  | 0 | 7.44     | 12.74    | 6.37   | < |
| 241 | 2 | -1  | -21 | 0 | 8.96     | 9.55     | 3.18   | o |
| 241 | 1 | 1   | 21  | 0 | 8.96     | 9.55     | 3.18   | o |
| 242 | 2 | -2  | -21 | 0 | 362.54   | 385.38   | 15.92  | o |
| 242 | 1 | 2   | 21  | 0 | 362.54   | 385.38   | 15.92  | o |
| 243 | 2 | -3  | -21 | 0 | 16.14    | 25.48    | 3.18   | o |
| 243 | 1 | 3   | 21  | 0 | 16.14    | 25.48    | 3.18   | o |
| 244 | 2 | -4  | -21 | 0 | 3285.41  | 3844.21  | 136.95 | o |
| 244 | 1 | 4   | 21  | 0 | 3285.41  | 3844.21  | 136.95 | o |
| 245 | 2 | -5  | -21 | 0 | 2.40     | 6.37     | 3.18   | < |
| 245 | 1 | 5   | 21  | 0 | 2.40     | 6.37     | 3.18   | < |
| 246 | 2 | -6  | -21 | 0 | 2.05     | 15.92    | 31.85  | < |
| 246 | 1 | 6   | 21  | 0 | 2.05     | 15.92    | 31.85  | < |
| 247 | 2 | -7  | -21 | 0 | 4.48     | 6.37     | 3.18   | < |
| 247 | 1 | 7   | 21  | 0 | 4.48     | 6.37     | 3.18   | < |
| 248 | 2 | -8  | -21 | 0 | 60.30    | 63.70    | 6.37   | o |
| 248 | 1 | 8   | 21  | 0 | 60.30    | 63.70    | 6.37   | o |
| 249 | 2 | -9  | -21 | 0 | 11.44    | 6.37     | 3.18   | < |
| 249 | 1 | 9   | 21  | 0 | 11.44    | 6.37     | 3.18   | < |
| 250 | 2 | -10 | -21 | 0 | 20.57    | 25.48    | 6.37   | o |
| 250 | 1 | 10  | 21  | 0 | 20.57    | 25.48    | 6.37   | o |
| 251 | 2 | 0   | -22 | 0 | 1555.37  | 1770.82  | 82.81  | o |
| 251 | 1 | 0   | 22  | 0 | 1555.37  | 1770.82  | 82.81  | o |
| 252 | 2 | -1  | -22 | 0 | 6.14     | 9.55     | 3.18   | o |
| 252 | 1 | 1   | 22  | 0 | 6.14     | 9.55     | 3.18   | o |
| 253 | 2 | -2  | -22 | 0 | 4104.49  | 4366.54  | 136.95 | o |
| 253 | 1 | 2   | 22  | 0 | 4104.49  | 4366.54  | 136.95 | o |
| 254 | 2 | -3  | -22 | 0 | 3.51     | 9.55     | 3.18   | o |
| 254 | 1 | 3   | 22  | 0 | 3.51     | 9.55     | 3.18   | o |
| 255 | 2 | -4  | -22 | 0 | 10657.10 | 10898.80 | 385.38 | o |
| 255 | 1 | 4   | 22  | 0 | 10657.10 | 10898.80 | 385.38 | o |
| 256 | 2 | -5  | -22 | 0 | 33.51    | 28.66    | 3.18   | o |
| 256 | 1 | 5   | 22  | 0 | 33.51    | 28.66    | 3.18   | o |
| 257 | 2 | -6  | -22 | 0 | 103.83   | 105.10   | 6.37   | o |
| 257 | 1 | 6   | 22  | 0 | 103.83   | 105.10   | 6.37   | o |
| 258 | 2 | -7  | -22 | 0 | 2.12     | 9.55     | 6.37   | < |
| 258 | 1 | 7   | 22  | 0 | 2.12     | 9.55     | 6.37   | < |
| 259 | 2 | -8  | -22 | 0 | 587.60   | 480.92   | 19.11  | o |
| 259 | 1 | 8   | 22  | 0 | 587.60   | 480.92   | 19.11  | o |
| 260 | 2 | -9  | -22 | 0 | 34.38    | 19.11    | 6.37   | o |
| 260 | 1 | 9   | 22  | 0 | 34.38    | 19.11    | 6.37   | o |
| 261 | 2 | -1  | -23 | 0 | 88.08    | 117.84   | 6.37   | o |
| 261 | 1 | 1   | 23  | 0 | 88.08    | 117.84   | 6.37   | o |
| 262 | 2 | -2  | -23 | 0 | 164.48   | 178.36   | 9.55   | o |
| 262 | 1 | 2   | 23  | 0 | 164.48   | 178.36   | 9.55   | o |
| 263 | 2 | -3  | -23 | 0 | 123.85   | 159.25   | 9.55   | o |
| 263 | 1 | 3   | 23  | 0 | 123.85   | 159.25   | 9.55   | o |
| 264 | 2 | -4  | -23 | 0 | 1828.44  | 1907.77  | 89.18  | o |
| 264 | 1 | 4   | 23  | 0 | 1828.44  | 1907.77  | 89.18  | o |

|     |   |    |     |   |         |          |        |   |
|-----|---|----|-----|---|---------|----------|--------|---|
| 265 | 2 | -5 | -23 | 0 | 33.54   | 41.40    | 3.18   | o |
| 265 | 1 | 5  | 23  | 0 | 33.54   | 41.40    | 3.18   | o |
| 266 | 2 | -6 | -23 | 0 | 263.23  | 254.79   | 12.74  | o |
| 266 | 1 | 6  | 23  | 0 | 263.23  | 254.79   | 12.74  | o |
| 267 | 2 | -7 | -23 | 0 | 16.92   | 25.48    | 3.18   | o |
| 267 | 1 | 7  | 23  | 0 | 16.92   | 25.48    | 3.18   | o |
| 268 | 2 | -8 | -23 | 0 | 49.46   | 50.96    | 6.37   | o |
| 268 | 1 | 8  | 23  | 0 | 49.46   | 50.96    | 6.37   | o |
| 269 | 2 | 0  | -24 | 0 | 8194.42 | 8758.55  | 379.01 | o |
| 269 | 1 | 0  | 24  | 0 | 8194.42 | 8758.55  | 379.01 | o |
| 270 | 2 | -1 | -24 | 0 | 16.44   | 25.48    | 3.18   | o |
| 270 | 1 | 1  | 24  | 0 | 16.44   | 25.48    | 3.18   | o |
| 271 | 2 | -2 | -24 | 0 | 9778.19 | 10819.20 | 382.19 | o |
| 271 | 1 | 2  | 24  | 0 | 9778.19 | 10819.20 | 382.19 | o |
| 272 | 2 | -3 | -24 | 0 | 26.89   | 35.03    | 3.18   | o |
| 272 | 1 | 3  | 24  | 0 | 26.89   | 35.03    | 3.18   | o |
| 273 | 2 | -4 | -24 | 0 | 591.98  | 525.51   | 22.29  | o |
| 273 | 1 | 4  | 24  | 0 | 591.98  | 525.51   | 22.29  | o |
| 274 | 2 | -5 | -24 | 0 | 31.11   | 54.14    | 6.37   | o |
| 274 | 1 | 5  | 24  | 0 | 31.11   | 54.14    | 6.37   | o |
| 275 | 2 | -6 | -24 | 0 | 4207.59 | 4143.59  | 130.58 | o |
| 275 | 1 | 6  | 24  | 0 | 4207.59 | 4143.59  | 130.58 | o |
| 276 | 2 | -7 | -24 | 0 | 89.85   | 117.84   | 9.55   | o |
| 276 | 1 | 7  | 24  | 0 | 89.85   | 117.84   | 9.55   | o |
| 277 | 2 | -1 | -25 | 0 | 26.78   | 41.40    | 6.37   | o |
| 277 | 1 | 1  | 25  | 0 | 26.78   | 41.40    | 6.37   | o |
| 278 | 2 | -3 | -25 | 0 | 43.48   | 66.88    | 6.37   | o |
| 278 | 1 | 3  | 25  | 0 | 43.48   | 66.88    | 6.37   | o |
| 279 | 2 | -4 | -25 | 0 | 252.57  | 283.46   | 12.74  | o |
| 279 | 1 | 4  | 25  | 0 | 252.57  | 283.46   | 12.74  | o |
| 280 | 2 | -5 | -25 | 0 | 9.22    | 9.55     | 3.18   | o |
| 280 | 1 | 5  | 25  | 0 | 9.22    | 9.55     | 3.18   | o |
| 281 | 2 | -6 | -25 | 0 | 155.98  | 162.43   | 12.74  | o |
| 281 | 1 | 6  | 25  | 0 | 155.98  | 162.43   | 12.74  | o |
| 282 | 2 | -7 | -25 | 0 | 7.12    | 6.37     | 6.37   | < |
| 282 | 1 | 7  | 25  | 0 | 7.12    | 6.37     | 6.37   | < |
| 283 | 2 | 0  | -26 | 0 | 1180.96 | 1251.68  | 60.51  | o |
| 283 | 1 | 0  | 26  | 0 | 1180.96 | 1251.68  | 60.51  | o |
| 284 | 2 | -1 | -26 | 0 | 1.83    | 6.37     | 6.37   | < |
| 284 | 1 | 1  | 26  | 0 | 1.83    | 6.37     | 6.37   | < |
| 285 | 2 | -2 | -26 | 0 | 6564.92 | 6978.18  | 213.39 | o |
| 285 | 1 | 2  | 26  | 0 | 6564.92 | 6978.18  | 213.39 | o |
| 286 | 2 | -3 | -26 | 0 | 5.69    | 19.11    | 3.18   | o |
| 286 | 1 | 3  | 26  | 0 | 5.69    | 19.11    | 3.18   | o |
| 287 | 2 | -4 | -26 | 0 | 964.10  | 850.38   | 35.03  | o |
| 287 | 1 | 4  | 26  | 0 | 964.10  | 850.38   | 35.03  | o |
| 288 | 2 | -5 | -26 | 0 | 5.32    | 6.37     | 6.37   | < |
| 288 | 1 | 5  | 26  | 0 | 5.32    | 6.37     | 6.37   | < |
| 289 | 2 | -6 | -26 | 0 | 4876.02 | 4866.57  | 299.38 | o |
| 289 | 1 | 6  | 26  | 0 | 4876.02 | 4866.57  | 299.38 | o |
| 290 | 2 | -1 | -27 | 0 | 69.27   | 95.55    | 6.37   | o |
| 290 | 1 | 1  | 27  | 0 | 69.27   | 95.55    | 6.37   | o |
| 291 | 2 | -2 | -27 | 0 | 3439.77 | 3891.98  | 140.14 | o |
| 291 | 1 | 2  | 27  | 0 | 3439.77 | 3891.98  | 140.14 | o |
| 292 | 2 | -3 | -27 | 0 | 27.19   | 44.59    | 6.37   | o |
| 292 | 1 | 3  | 27  | 0 | 27.19   | 44.59    | 6.37   | o |
| 293 | 2 | -4 | -27 | 0 | 322.87  | 379.01   | 22.29  | o |
| 293 | 1 | 4  | 27  | 0 | 322.87  | 379.01   | 22.29  | o |

|     |   |     |     |   |          |          |         |   |
|-----|---|-----|-----|---|----------|----------|---------|---|
| 294 | 2 | -5  | -27 | 0 | 0.16     | -3.18    | 3.18    | < |
| 294 | 1 | 5   | 27  | 0 | 0.16     | -3.18    | 3.18    | < |
| 295 | 2 | -6  | -27 | 0 | 295.48   | 293.01   | 19.11   | o |
| 295 | 1 | 6   | 27  | 0 | 295.48   | 293.01   | 19.11   | o |
| 296 | 2 | -1  | -28 | 0 | 1.57     | 3.18     | 6.37    | < |
| 296 | 1 | 1   | 28  | 0 | 1.57     | 3.18     | 6.37    | < |
| 297 | 2 | -2  | -28 | 0 | 30.50    | 50.96    | 15.92   | o |
| 297 | 1 | 2   | 28  | 0 | 30.50    | 50.96    | 15.92   | o |
| 298 | 2 | -3  | -28 | 0 | 7.49     | 6.37     | 6.37    | < |
| 298 | 1 | 3   | 28  | 0 | 7.49     | 6.37     | 6.37    | < |
| 299 | 2 | -4  | -28 | 0 | 5926.70  | 5876.19  | 257.98  | o |
| 299 | 1 | 4   | 28  | 0 | 5926.70  | 5876.19  | 257.98  | o |
| 300 | 2 | -5  | -28 | 0 | 45.18    | 38.22    | 6.37    | o |
| 300 | 1 | 5   | 28  | 0 | 45.18    | 38.22    | 6.37    | o |
| 301 | 2 | 8   | -1  | 1 | 63627.60 | 55344.50 | 2356.85 | o |
| 301 | 1 | -8  | 1   | 1 | 63627.60 | 55344.50 | 2356.85 | o |
| 302 | 2 | 7   | -1  | 1 | 2187.98  | 1961.92  | 85.99   | o |
| 302 | 1 | -7  | 1   | 1 | 2187.98  | 1961.92  | 85.99   | o |
| 303 | 2 | 5   | -1  | 1 | 4357.07  | 3729.55  | 159.25  | o |
| 303 | 1 | -5  | 1   | 1 | 4357.07  | 3729.55  | 159.25  | o |
| 304 | 2 | 4   | -1  | 1 | 31370.70 | 24180.00 | 1031.92 | o |
| 304 | 1 | -4  | 1   | 1 | 31370.70 | 24180.00 | 1031.92 | o |
| 305 | 2 | 2   | -1  | 1 | 811.20   | 799.42   | 28.66   | o |
| 305 | 1 | -2  | 1   | 1 | 811.20   | 799.42   | 28.66   | o |
| 306 | 2 | 1   | -1  | 1 | 17978.10 | 15618.90 | 547.81  | o |
| 306 | 1 | -1  | 1   | 1 | 17978.10 | 15618.90 | 547.81  | o |
| 307 | 2 | -1  | -1  | 1 | 20449.00 | 16405.60 | 500.03  | o |
| 307 | 1 | 1   | 1   | 1 | 20449.00 | 16405.60 | 500.03  | o |
| 308 | 2 | -3  | -1  | 1 | 475.34   | 566.92   | 19.11   | o |
| 308 | 1 | 3   | 1   | 1 | 475.34   | 566.92   | 19.11   | o |
| 309 | 2 | -4  | -1  | 1 | 28655.50 | 25246.90 | 758.01  | o |
| 309 | 1 | 4   | 1   | 1 | 28655.50 | 25246.90 | 758.01  | o |
| 310 | 2 | -5  | -1  | 1 | 3933.56  | 3882.43  | 117.84  | o |
| 310 | 1 | 5   | 1   | 1 | 3933.56  | 3882.43  | 117.84  | o |
| 311 | 2 | -7  | -1  | 1 | 2195.06  | 2022.43  | 60.51   | o |
| 311 | 1 | 7   | 1   | 1 | 2195.06  | 2022.43  | 60.51   | o |
| 312 | 2 | -8  | -1  | 1 | 60931.60 | 55551.50 | 1672.09 | o |
| 312 | 1 | 8   | 1   | 1 | 60931.60 | 55551.50 | 1672.09 | o |
| 313 | 2 | -9  | -1  | 1 | 4410.31  | 4258.25  | 366.27  | o |
| 313 | 1 | 9   | 1   | 1 | 4410.31  | 4258.25  | 366.27  | o |
| 314 | 2 | -10 | -1  | 1 | 1272.98  | 984.14   | 44.59   | o |
| 314 | 1 | 10  | 1   | 1 | 1272.98  | 984.14   | 44.59   | o |
| 315 | 2 | 10  | -2  | 1 | 480.25   | 566.92   | 35.03   | o |
| 315 | 1 | -10 | 2   | 1 | 480.25   | 566.92   | 35.03   | o |
| 316 | 2 | 9   | -2  | 1 | 24.38    | 12.74    | 3.18    | o |
| 316 | 1 | -9  | 2   | 1 | 24.38    | 12.74    | 3.18    | o |
| 317 | 2 | 8   | -2  | 1 | 242.56   | 35.03    | 19.11   | < |
| 317 | 1 | -8  | 2   | 1 | 242.56   | 35.03    | 19.11   | < |
| 318 | 2 | 7   | -2  | 1 | 1103.47  | 882.22   | 38.22   | o |
| 318 | 1 | -7  | 2   | 1 | 1103.47  | 882.22   | 38.22   | o |
| 319 | 2 | 6   | -2  | 1 | 208.34   | 168.80   | 9.55    | o |
| 319 | 1 | -6  | 2   | 1 | 208.34   | 168.80   | 9.55    | o |
| 320 | 2 | 5   | -2  | 1 | 656.97   | 557.36   | 25.48   | o |
| 320 | 1 | -5  | 2   | 1 | 656.97   | 557.36   | 25.48   | o |
| 321 | 2 | 4   | -2  | 1 | 449.00   | 359.90   | 15.92   | o |
| 321 | 1 | -4  | 2   | 1 | 449.00   | 359.90   | 15.92   | o |
| 322 | 2 | 3   | -2  | 1 | 55.51    | 41.40    | 3.18    | o |
| 322 | 1 | -3  | 2   | 1 | 55.51    | 41.40    | 3.18    | o |

|     |   |     |    |   |          |          |        |   |
|-----|---|-----|----|---|----------|----------|--------|---|
| 323 | 2 | 2   | -2 | 1 | 210.18   | 178.36   | 9.55   | o |
| 323 | 1 | -2  | 2  | 1 | 210.18   | 178.36   | 9.55   | o |
| 324 | 2 | 0   | -2 | 1 | 100.56   | 140.14   | 6.37   | o |
| 324 | 1 | 0   | 2  | 1 | 100.56   | 140.14   | 6.37   | o |
| 325 | 2 | -2  | -2 | 1 | 265.65   | 280.27   | 9.55   | o |
| 325 | 1 | 2   | 2  | 1 | 265.65   | 280.27   | 9.55   | o |
| 326 | 2 | -3  | -2 | 1 | 50.94    | 6.37     | 3.18   | < |
| 326 | 1 | 3   | 2  | 1 | 50.94    | 6.37     | 3.18   | < |
| 327 | 2 | -4  | -2 | 1 | 168.02   | 216.57   | 9.55   | o |
| 327 | 1 | 4   | 2  | 1 | 168.02   | 216.57   | 9.55   | o |
| 328 | 2 | -6  | -2 | 1 | 106.75   | 111.47   | 6.37   | o |
| 328 | 1 | 6   | 2  | 1 | 106.75   | 111.47   | 6.37   | o |
| 329 | 2 | -7  | -2 | 1 | 1376.52  | 1184.79  | 38.22  | o |
| 329 | 1 | 7   | 2  | 1 | 1376.52  | 1184.79  | 38.22  | o |
| 330 | 2 | -8  | -2 | 1 | 887.85   | 630.62   | 41.40  | o |
| 330 | 1 | 8   | 2  | 1 | 887.85   | 630.62   | 41.40  | o |
| 331 | 2 | -9  | -2 | 1 | 59.69    | 54.14    | 6.37   | o |
| 331 | 1 | 9   | 2  | 1 | 59.69    | 54.14    | 6.37   | o |
| 332 | 2 | -10 | -2 | 1 | 117.06   | 22.29    | 35.03  | < |
| 332 | 1 | 10  | 2  | 1 | 117.06   | 22.29    | 35.03  | < |
| 333 | 2 | -11 | -2 | 1 | 110.61   | 124.21   | 9.55   | o |
| 333 | 1 | 11  | 2  | 1 | 110.61   | 124.21   | 9.55   | o |
| 334 | 2 | 11  | -3 | 1 | 218.15   | 171.99   | 12.74  | o |
| 334 | 1 | -11 | 3  | 1 | 218.15   | 171.99   | 12.74  | o |
| 335 | 2 | 10  | -3 | 1 | 2110.38  | 2146.64  | 95.55  | o |
| 335 | 1 | -10 | 3  | 1 | 2110.38  | 2146.64  | 95.55  | o |
| 336 | 2 | 9   | -3 | 1 | 73.73    | 60.51    | 6.37   | o |
| 336 | 1 | -9  | 3  | 1 | 73.73    | 60.51    | 6.37   | o |
| 337 | 2 | 8   | -3 | 1 | 1327.63  | 1089.25  | 47.77  | o |
| 337 | 1 | -8  | 3  | 1 | 1327.63  | 1089.25  | 47.77  | o |
| 338 | 2 | 7   | -3 | 1 | 8229.95  | 6885.81  | 293.01 | o |
| 338 | 1 | -7  | 3  | 1 | 8229.95  | 6885.81  | 293.01 | o |
| 339 | 2 | 6   | -3 | 1 | 4025.72  | 3223.15  | 136.95 | o |
| 339 | 1 | -6  | 3  | 1 | 4025.72  | 3223.15  | 136.95 | o |
| 340 | 2 | 5   | -3 | 1 | 510.47   | 522.33   | 35.03  | o |
| 340 | 1 | -5  | 3  | 1 | 510.47   | 522.33   | 35.03  | o |
| 341 | 2 | 4   | -3 | 1 | 4927.32  | 4411.12  | 187.91 | o |
| 341 | 1 | -4  | 3  | 1 | 4927.32  | 4411.12  | 187.91 | o |
| 342 | 2 | 3   | -3 | 1 | 4165.95  | 3720.00  | 130.58 | o |
| 342 | 1 | -3  | 3  | 1 | 4165.95  | 3720.00  | 130.58 | o |
| 343 | 2 | 2   | -3 | 1 | 20100.70 | 22485.60 | 684.76 | o |
| 343 | 1 | -2  | 3  | 1 | 20100.70 | 22485.60 | 684.76 | o |
| 344 | 2 | 1   | -3 | 1 | 5626.49  | 5586.36  | 168.80 | o |
| 344 | 1 | -1  | 3  | 1 | 5626.49  | 5586.36  | 168.80 | o |
| 345 | 2 | 0   | -3 | 1 | 506.14   | 605.14   | 22.29  | o |
| 345 | 1 | 0   | 3  | 1 | 506.14   | 605.14   | 22.29  | o |
| 346 | 2 | -1  | -3 | 1 | 4962.51  | 5519.48  | 168.80 | o |
| 346 | 1 | 1   | 3  | 1 | 4962.51  | 5519.48  | 168.80 | o |
| 347 | 2 | -2  | -3 | 1 | 28941.60 | 25705.50 | 777.12 | o |
| 347 | 1 | 2   | 3  | 1 | 28941.60 | 25705.50 | 777.12 | o |
| 348 | 2 | -4  | -3 | 1 | 2807.66  | 3401.50  | 108.29 | o |
| 348 | 1 | 4   | 3  | 1 | 2807.66  | 3401.50  | 108.29 | o |
| 349 | 2 | -5  | -3 | 1 | 1001.54  | 965.03   | 31.85  | o |
| 349 | 1 | 5   | 3  | 1 | 1001.54  | 965.03   | 31.85  | o |
| 350 | 2 | -6  | -3 | 1 | 2052.24  | 1624.31  | 57.33  | o |
| 350 | 1 | 6   | 3  | 1 | 2052.24  | 1624.31  | 57.33  | o |
| 351 | 2 | -7  | -3 | 1 | 8854.23  | 8277.63  | 315.31 | o |
| 351 | 1 | 7   | 3  | 1 | 8854.23  | 8277.63  | 315.31 | o |



|     |   |     |    |   |         |         |        |   |
|-----|---|-----|----|---|---------|---------|--------|---|
| 352 | 2 | -8  | -3 | 1 | 1014.24 | 879.04  | 47.77  | o |
| 352 | 1 | 8   | 3  | 1 | 1014.24 | 879.04  | 47.77  | o |
| 353 | 2 | -9  | -3 | 1 | 73.66   | 66.88   | 6.37   | o |
| 353 | 1 | 9   | 3  | 1 | 73.66   | 66.88   | 6.37   | o |
| 354 | 2 | -10 | -3 | 1 | 2030.70 | 2137.09 | 140.14 | o |
| 354 | 1 | 10  | 3  | 1 | 2030.70 | 2137.09 | 140.14 | o |
| 355 | 2 | -11 | -3 | 1 | 193.24  | 149.69  | 19.11  | o |
| 355 | 1 | 11  | 3  | 1 | 193.24  | 149.69  | 19.11  | o |
| 356 | 2 | 11  | -4 | 1 | 41.17   | 35.03   | 3.18   | o |
| 356 | 1 | -11 | 4  | 1 | 41.17   | 35.03   | 3.18   | o |
| 357 | 2 | 10  | -4 | 1 | 34.89   | 12.74   | 6.37   | < |
| 357 | 1 | -10 | 4  | 1 | 34.89   | 12.74   | 6.37   | < |
| 358 | 2 | 9   | -4 | 1 | 139.58  | 136.95  | 12.74  | o |
| 358 | 1 | -9  | 4  | 1 | 139.58  | 136.95  | 12.74  | o |
| 359 | 2 | 8   | -4 | 1 | 674.04  | 636.98  | 28.66  | o |
| 359 | 1 | -8  | 4  | 1 | 674.04  | 636.98  | 28.66  | o |
| 360 | 2 | 7   | -4 | 1 | 111.60  | 98.73   | 6.37   | o |
| 360 | 1 | -7  | 4  | 1 | 111.60  | 98.73   | 6.37   | o |
| 361 | 2 | 6   | -4 | 1 | 433.18  | 414.04  | 19.11  | o |
| 361 | 1 | -6  | 4  | 1 | 433.18  | 414.04  | 19.11  | o |
| 362 | 2 | 5   | -4 | 1 | 312.83  | 442.70  | 19.11  | o |
| 362 | 1 | -5  | 4  | 1 | 312.83  | 442.70  | 19.11  | o |
| 363 | 2 | 4   | -4 | 1 | 199.27  | 216.57  | 9.55   | o |
| 363 | 1 | -4  | 4  | 1 | 199.27  | 216.57  | 9.55   | o |
| 364 | 2 | 3   | -4 | 1 | 2679.06 | 2261.30 | 70.07  | o |
| 364 | 1 | -3  | 4  | 1 | 2679.06 | 2261.30 | 70.07  | o |
| 365 | 2 | 0   | -4 | 1 | 86.90   | 70.07   | 3.18   | o |
| 365 | 1 | 0   | 4  | 1 | 86.90   | 70.07   | 3.18   | o |
| 366 | 2 | -2  | -4 | 1 | 156.58  | 165.62  | 6.37   | o |
| 366 | 1 | 2   | 4  | 1 | 156.58  | 165.62  | 6.37   | o |
| 367 | 2 | -3  | -4 | 1 | 2561.49 | 2296.33 | 70.07  | o |
| 367 | 1 | 3   | 4  | 1 | 2561.49 | 2296.33 | 70.07  | o |
| 368 | 2 | -4  | -4 | 1 | 237.38  | 229.32  | 6.37   | o |
| 368 | 1 | 4   | 4  | 1 | 237.38  | 229.32  | 6.37   | o |
| 369 | 2 | -5  | -4 | 1 | 584.40  | 665.65  | 22.29  | o |
| 369 | 1 | 5   | 4  | 1 | 584.40  | 665.65  | 22.29  | o |
| 370 | 2 | -6  | -4 | 1 | 796.00  | 662.47  | 22.29  | o |
| 370 | 1 | 6   | 4  | 1 | 796.00  | 662.47  | 22.29  | o |
| 371 | 2 | -7  | -4 | 1 | 31.68   | 38.22   | 3.18   | o |
| 371 | 1 | 7   | 4  | 1 | 31.68   | 38.22   | 3.18   | o |
| 372 | 2 | -8  | -4 | 1 | 331.06  | 404.49  | 31.85  | o |
| 372 | 1 | 8   | 4  | 1 | 331.06  | 404.49  | 31.85  | o |
| 373 | 2 | -9  | -4 | 1 | 76.13   | 76.44   | 6.37   | o |
| 373 | 1 | 9   | 4  | 1 | 76.13   | 76.44   | 6.37   | o |
| 374 | 2 | -10 | -4 | 1 | 121.57  | 101.92  | 6.37   | o |
| 374 | 1 | 10  | 4  | 1 | 121.57  | 101.92  | 6.37   | o |
| 375 | 2 | -11 | -4 | 1 | 65.92   | 79.62   | 6.37   | o |
| 375 | 1 | 11  | 4  | 1 | 65.92   | 79.62   | 6.37   | o |
| 376 | 2 | -12 | -4 | 1 | 76.85   | 41.40   | 6.37   | o |
| 376 | 1 | 12  | 4  | 1 | 76.85   | 41.40   | 6.37   | o |
| 377 | 2 | 12  | -5 | 1 | 704.90  | 681.57  | 31.85  | o |
| 377 | 1 | -12 | 5  | 1 | 704.90  | 681.57  | 31.85  | o |
| 378 | 2 | 11  | -5 | 1 | 340.25  | 216.57  | 35.03  | o |
| 378 | 1 | -11 | 5  | 1 | 340.25  | 216.57  | 35.03  | o |
| 379 | 2 | 10  | -5 | 1 | 4847.99 | 4735.99 | 203.84 | o |
| 379 | 1 | -10 | 5  | 1 | 4847.99 | 4735.99 | 203.84 | o |
| 380 | 2 | 9   | -5 | 1 | 439.18  | 337.60  | 19.11  | o |
| 380 | 1 | -9  | 5  | 1 | 439.18  | 337.60  | 19.11  | o |

|     |   |     |    |   |           |           |         |   |
|-----|---|-----|----|---|-----------|-----------|---------|---|
| 381 | 2 | 8   | -5 | 1 | 159.15    | 121.03    | 9.55    | o |
| 381 | 1 | -8  | 5  | 1 | 159.15    | 121.03    | 9.55    | o |
| 382 | 2 | 7   | -5 | 1 | 4554.35   | 4621.33   | 197.46  | o |
| 382 | 1 | -7  | 5  | 1 | 4554.35   | 4621.33   | 197.46  | o |
| 383 | 2 | 6   | -5 | 1 | 6075.73   | 5013.08   | 216.57  | o |
| 383 | 1 | -6  | 5  | 1 | 6075.73   | 5013.08   | 216.57  | o |
| 384 | 2 | 5   | -5 | 1 | 7979.52   | 6736.12   | 257.98  | o |
| 384 | 1 | -5  | 5  | 1 | 7979.52   | 6736.12   | 257.98  | o |
| 385 | 2 | 4   | -5 | 1 | 9121.33   | 8930.54   | 270.72  | o |
| 385 | 1 | -4  | 5  | 1 | 9121.33   | 8930.54   | 270.72  | o |
| 386 | 2 | 3   | -5 | 1 | 17469.40  | 14599.70  | 442.70  | o |
| 386 | 1 | -3  | 5  | 1 | 17469.40  | 14599.70  | 442.70  | o |
| 387 | 2 | 2   | -5 | 1 | 121520.00 | 110679.00 | 3334.62 | o |
| 387 | 1 | -2  | 5  | 1 | 121520.00 | 110679.00 | 3334.62 | o |
| 388 | 2 | 1   | -5 | 1 | 12.41     | -35.03    | 3.18    | < |
| 388 | 1 | -1  | 5  | 1 | 12.41     | -35.03    | 3.18    | < |
| 389 | 2 | -1  | -5 | 1 | 3.51      | -41.40    | 3.18    | < |
| 389 | 1 | 1   | 5  | 1 | 3.51      | -41.40    | 3.18    | < |
| 390 | 2 | -2  | -5 | 1 | 124705.00 | 118097.00 | 3560.75 | o |
| 390 | 1 | 2   | 5  | 1 | 124705.00 | 118097.00 | 3560.75 | o |
| 391 | 2 | -3  | -5 | 1 | 16759.10  | 14720.70  | 445.89  | o |
| 391 | 1 | 3   | 5  | 1 | 16759.10  | 14720.70  | 445.89  | o |
| 392 | 2 | -4  | -5 | 1 | 7571.63   | 8185.26   | 251.61  | o |
| 392 | 1 | 4   | 5  | 1 | 7571.63   | 8185.26   | 251.61  | o |
| 393 | 2 | -5  | -5 | 1 | 6858.75   | 6248.83   | 191.10  | o |
| 393 | 1 | 5   | 5  | 1 | 6858.75   | 6248.83   | 191.10  | o |
| 394 | 2 | -6  | -5 | 1 | 3844.97   | 4331.50   | 140.14  | o |
| 394 | 1 | 6   | 5  | 1 | 3844.97   | 4331.50   | 140.14  | o |
| 395 | 2 | -7  | -5 | 1 | 4773.71   | 4554.45   | 226.13  | o |
| 395 | 1 | 7   | 5  | 1 | 4773.71   | 4554.45   | 226.13  | o |
| 396 | 2 | -8  | -5 | 1 | 40.29     | 95.55     | 9.55    | o |
| 396 | 1 | 8   | 5  | 1 | 40.29     | 95.55     | 9.55    | o |
| 397 | 2 | -9  | -5 | 1 | 438.52    | 458.63    | 31.85   | o |
| 397 | 1 | 9   | 5  | 1 | 438.52    | 458.63    | 31.85   | o |
| 398 | 2 | -10 | -5 | 1 | 4370.93   | 4321.95   | 194.28  | o |
| 398 | 1 | 10  | 5  | 1 | 4370.93   | 4321.95   | 194.28  | o |
| 399 | 2 | -11 | -5 | 1 | 416.58    | 455.45    | 25.48   | o |
| 399 | 1 | 11  | 5  | 1 | 416.58    | 455.45    | 25.48   | o |
| 400 | 2 | -12 | -5 | 1 | 423.45    | 328.05    | 22.29   | o |
| 400 | 1 | 12  | 5  | 1 | 423.45    | 328.05    | 22.29   | o |
| 401 | 2 | -13 | -5 | 1 | 123.89    | 149.69    | 9.55    | o |
| 401 | 1 | 13  | 5  | 1 | 123.89    | 149.69    | 9.55    | o |
| 402 | 2 | 13  | -6 | 1 | 60.13     | 63.70     | 6.37    | o |
| 402 | 1 | -13 | 6  | 1 | 60.13     | 63.70     | 6.37    | o |
| 403 | 2 | 12  | -6 | 1 | 15.67     | 19.11     | 3.18    | o |
| 403 | 1 | -12 | 6  | 1 | 15.67     | 19.11     | 3.18    | o |
| 404 | 2 | 11  | -6 | 1 | 94.51     | 70.07     | 6.37    | o |
| 404 | 1 | -11 | 6  | 1 | 94.51     | 70.07     | 6.37    | o |
| 405 | 2 | 10  | -6 | 1 | 685.53    | 894.97    | 41.40   | o |
| 405 | 1 | -10 | 6  | 1 | 685.53    | 894.97    | 41.40   | o |
| 406 | 2 | 9   | -6 | 1 | 38.83     | 6.37      | 63.70   | < |
| 406 | 1 | -9  | 6  | 1 | 38.83     | 6.37      | 63.70   | < |
| 407 | 2 | 8   | -6 | 1 | 329.37    | 334.42    | 22.29   | o |
| 407 | 1 | -8  | 6  | 1 | 329.37    | 334.42    | 22.29   | o |
| 408 | 2 | 7   | -6 | 1 | 51.02     | 57.33     | 6.37    | o |
| 408 | 1 | -7  | 6  | 1 | 51.02     | 57.33     | 6.37    | o |
| 409 | 2 | 6   | -6 | 1 | 121.74    | 108.29    | 9.55    | o |
| 409 | 1 | -6  | 6  | 1 | 121.74    | 108.29    | 9.55    | o |

|     |   |     |    |   |          |          |         |   |
|-----|---|-----|----|---|----------|----------|---------|---|
| 410 | 2 | 5   | -6 | 1 | 32.21    | 47.77    | 3.18    | o |
| 410 | 1 | -5  | 6  | 1 | 32.21    | 47.77    | 3.18    | o |
| 411 | 2 | 3   | -6 | 1 | 53.32    | 57.33    | 3.18    | o |
| 411 | 1 | -3  | 6  | 1 | 53.32    | 57.33    | 3.18    | o |
| 412 | 2 | 2   | -6 | 1 | 564.39   | 525.51   | 15.92   | o |
| 412 | 1 | -2  | 6  | 1 | 564.39   | 525.51   | 15.92   | o |
| 413 | 2 | 1   | -6 | 1 | 346.00   | 286.64   | 9.55    | o |
| 413 | 1 | -1  | 6  | 1 | 346.00   | 286.64   | 9.55    | o |
| 414 | 2 | 0   | -6 | 1 | 1027.88  | 866.30   | 31.85   | o |
| 414 | 1 | 0   | 6  | 1 | 1027.88  | 866.30   | 31.85   | o |
| 415 | 2 | -1  | -6 | 1 | 246.71   | 264.35   | 9.55    | o |
| 415 | 1 | 1   | 6  | 1 | 246.71   | 264.35   | 9.55    | o |
| 416 | 2 | -2  | -6 | 1 | 673.66   | 535.07   | 19.11   | o |
| 416 | 1 | 2   | 6  | 1 | 673.66   | 535.07   | 19.11   | o |
| 417 | 2 | -4  | -6 | 1 | 845.69   | 885.41   | 28.66   | o |
| 417 | 1 | 4   | 6  | 1 | 845.69   | 885.41   | 28.66   | o |
| 418 | 2 | -5  | -6 | 1 | 11.44    | 22.29    | 3.18    | o |
| 418 | 1 | 5   | 6  | 1 | 11.44    | 22.29    | 3.18    | o |
| 419 | 2 | -6  | -6 | 1 | 69.57    | 92.36    | 6.37    | o |
| 419 | 1 | 6   | 6  | 1 | 69.57    | 92.36    | 6.37    | o |
| 420 | 2 | -7  | -6 | 1 | 104.48   | 95.55    | 3.18    | o |
| 420 | 1 | 7   | 6  | 1 | 104.48   | 95.55    | 3.18    | o |
| 421 | 2 | -8  | -6 | 1 | 89.68    | 41.40    | 85.99   | < |
| 421 | 1 | 8   | 6  | 1 | 89.68    | 41.40    | 85.99   | < |
| 422 | 2 | -9  | -6 | 1 | 137.33   | 133.77   | 9.55    | o |
| 422 | 1 | 9   | 6  | 1 | 137.33   | 133.77   | 9.55    | o |
| 423 | 2 | -10 | -6 | 1 | 249.60   | 101.92   | 152.88  | < |
| 423 | 1 | 10  | 6  | 1 | 249.60   | 101.92   | 152.88  | < |
| 424 | 2 | -11 | -6 | 1 | 175.70   | 216.57   | 19.11   | o |
| 424 | 1 | 11  | 6  | 1 | 175.70   | 216.57   | 19.11   | o |
| 425 | 2 | -12 | -6 | 1 | 8.58     | 6.37     | 3.18    | < |
| 425 | 1 | 12  | 6  | 1 | 8.58     | 6.37     | 3.18    | < |
| 426 | 2 | -13 | -6 | 1 | 90.84    | 130.58   | 12.74   | o |
| 426 | 1 | 13  | 6  | 1 | 90.84    | 130.58   | 12.74   | o |
| 427 | 2 | 13  | -7 | 1 | 91.42    | 85.99    | 9.55    | o |
| 427 | 1 | -13 | 7  | 1 | 91.42    | 85.99    | 9.55    | o |
| 428 | 2 | 12  | -7 | 1 | 877.84   | 910.89   | 50.96   | o |
| 428 | 1 | -12 | 7  | 1 | 877.84   | 910.89   | 50.96   | o |
| 429 | 2 | 11  | -7 | 1 | 1890.49  | 2159.38  | 143.32  | o |
| 429 | 1 | -11 | 7  | 1 | 1890.49  | 2159.38  | 143.32  | o |
| 430 | 2 | 10  | -7 | 1 | 3916.44  | 3767.77  | 232.50  | o |
| 430 | 1 | -10 | 7  | 1 | 3916.44  | 3767.77  | 232.50  | o |
| 431 | 2 | 9   | -7 | 1 | 1998.89  | 1847.26  | 117.84  | o |
| 431 | 1 | -9  | 7  | 1 | 1998.89  | 1847.26  | 117.84  | o |
| 432 | 2 | 8   | -7 | 1 | 6815.11  | 5841.16  | 251.61  | o |
| 432 | 1 | -8  | 7  | 1 | 6815.11  | 5841.16  | 251.61  | o |
| 433 | 2 | 7   | -7 | 1 | 1414.43  | 1359.96  | 60.51   | o |
| 433 | 1 | -7  | 7  | 1 | 1414.43  | 1359.96  | 60.51   | o |
| 434 | 2 | 6   | -7 | 1 | 69.65    | 82.81    | 3.18    | o |
| 434 | 1 | -6  | 7  | 1 | 69.65    | 82.81    | 3.18    | o |
| 435 | 2 | 5   | -7 | 1 | 14258.80 | 12902.10 | 449.08  | o |
| 435 | 1 | -5  | 7  | 1 | 14258.80 | 12902.10 | 449.08  | o |
| 436 | 2 | 4   | -7 | 1 | 15836.20 | 14004.10 | 423.60  | o |
| 436 | 1 | -4  | 7  | 1 | 15836.20 | 14004.10 | 423.60  | o |
| 437 | 2 | 2   | -7 | 1 | 49831.10 | 42544.30 | 1283.53 | o |
| 437 | 1 | -2  | 7  | 1 | 49831.10 | 42544.30 | 1283.53 | o |
| 438 | 2 | 1   | -7 | 1 | 1943.18  | 2477.87  | 76.44   | o |
| 438 | 1 | -1  | 7  | 1 | 1943.18  | 2477.87  | 76.44   | o |

|     |   |     |    |   |          |          |         |   |
|-----|---|-----|----|---|----------|----------|---------|---|
| 439 | 2 | -1  | -7 | 1 | 2896.25  | 2595.72  | 92.36   | o |
| 439 | 1 | 1   | 7  | 1 | 2896.25  | 2595.72  | 92.36   | o |
| 440 | 2 | -2  | -7 | 1 | 38979.10 | 41088.70 | 1242.12 | o |
| 440 | 1 | 2   | 7  | 1 | 38979.10 | 41088.70 | 1242.12 | o |
| 441 | 2 | -3  | -7 | 1 | 241.70   | 242.05   | 9.55    | o |
| 441 | 1 | 3   | 7  | 1 | 241.70   | 242.05   | 9.55    | o |
| 442 | 2 | -4  | -7 | 1 | 10344.10 | 11513.50 | 509.59  | o |
| 442 | 1 | 4   | 7  | 1 | 10344.10 | 11513.50 | 509.59  | o |
| 443 | 2 | -5  | -7 | 1 | 15752.80 | 14733.50 | 445.89  | o |
| 443 | 1 | 5   | 7  | 1 | 15752.80 | 14733.50 | 445.89  | o |
| 444 | 2 | -6  | -7 | 1 | 189.18   | 175.17   | 6.37    | o |
| 444 | 1 | 6   | 7  | 1 | 189.18   | 175.17   | 6.37    | o |
| 445 | 2 | -7  | -7 | 1 | 1140.61  | 1028.73  | 38.22   | o |
| 445 | 1 | 7   | 7  | 1 | 1140.61  | 1028.73  | 38.22   | o |
| 446 | 2 | -8  | -7 | 1 | 5279.81  | 4382.46  | 267.53  | o |
| 446 | 1 | 8   | 7  | 1 | 5279.81  | 4382.46  | 267.53  | o |
| 447 | 2 | -9  | -7 | 1 | 2265.04  | 2280.41  | 101.92  | o |
| 447 | 1 | 9   | 7  | 1 | 2265.04  | 2280.41  | 101.92  | o |
| 448 | 2 | -10 | -7 | 1 | 3156.94  | 3044.79  | 136.95  | o |
| 448 | 1 | 10  | 7  | 1 | 3156.94  | 3044.79  | 136.95  | o |
| 449 | 2 | -11 | -7 | 1 | 1548.75  | 1726.23  | 171.99  | o |
| 449 | 1 | 11  | 7  | 1 | 1548.75  | 1726.23  | 171.99  | o |
| 450 | 2 | -12 | -7 | 1 | 808.11   | 812.16   | 41.40   | o |
| 450 | 1 | 12  | 7  | 1 | 808.11   | 812.16   | 41.40   | o |
| 451 | 2 | -13 | -7 | 1 | 64.89    | 44.59    | 6.37    | o |
| 451 | 1 | 13  | 7  | 1 | 64.89    | 44.59    | 6.37    | o |
| 452 | 2 | 13  | -8 | 1 | 53.36    | 28.66    | 6.37    | o |
| 452 | 1 | -13 | 8  | 1 | 53.36    | 28.66    | 6.37    | o |
| 453 | 2 | 12  | -8 | 1 | 89.73    | 15.92    | 6.37    | < |
| 453 | 1 | -12 | 8  | 1 | 89.73    | 15.92    | 6.37    | < |
| 454 | 2 | 11  | -8 | 1 | 35.40    | 15.92    | 6.37    | < |
| 454 | 1 | -11 | 8  | 1 | 35.40    | 15.92    | 6.37    | < |
| 455 | 2 | 10  | -8 | 1 | 54.86    | 63.70    | 9.55    | o |
| 455 | 1 | -10 | 8  | 1 | 54.86    | 63.70    | 9.55    | o |
| 456 | 2 | 9   | -8 | 1 | 213.12   | 171.99   | 12.74   | o |
| 456 | 1 | -9  | 8  | 1 | 213.12   | 171.99   | 12.74   | o |
| 457 | 2 | 8   | -8 | 1 | 176.40   | 152.88   | 9.55    | o |
| 457 | 1 | -8  | 8  | 1 | 176.40   | 152.88   | 9.55    | o |
| 458 | 2 | 7   | -8 | 1 | 410.91   | 299.38   | 22.29   | o |
| 458 | 1 | -7  | 8  | 1 | 410.91   | 299.38   | 22.29   | o |
| 459 | 2 | 6   | -8 | 1 | 726.76   | 665.65   | 22.29   | o |
| 459 | 1 | -6  | 8  | 1 | 726.76   | 665.65   | 22.29   | o |
| 460 | 2 | 5   | -8 | 1 | 185.10   | 149.69   | 6.37    | o |
| 460 | 1 | -5  | 8  | 1 | 185.10   | 149.69   | 6.37    | o |
| 461 | 2 | 3   | -8 | 1 | 390.77   | 308.94   | 15.92   | o |
| 461 | 1 | -3  | 8  | 1 | 390.77   | 308.94   | 15.92   | o |
| 462 | 2 | 2   | -8 | 1 | 456.76   | 366.27   | 12.74   | o |
| 462 | 1 | -2  | 8  | 1 | 456.76   | 366.27   | 12.74   | o |
| 463 | 2 | 1   | -8 | 1 | 1812.26  | 1541.50  | 54.14   | o |
| 463 | 1 | -1  | 8  | 1 | 1812.26  | 1541.50  | 54.14   | o |
| 464 | 2 | -1  | -8 | 1 | 1454.05  | 1442.77  | 44.59   | o |
| 464 | 1 | 1   | 8  | 1 | 1454.05  | 1442.77  | 44.59   | o |
| 465 | 2 | -3  | -8 | 1 | 220.70   | 286.64   | 15.92   | o |
| 465 | 1 | 3   | 8  | 1 | 220.70   | 286.64   | 15.92   | o |
| 466 | 2 | -4  | -8 | 1 | 304.44   | 251.61   | 9.55    | o |
| 466 | 1 | 4   | 8  | 1 | 304.44   | 251.61   | 9.55    | o |
| 467 | 2 | -5  | -8 | 1 | 265.20   | 207.02   | 9.55    | o |
| 467 | 1 | 5   | 8  | 1 | 265.20   | 207.02   | 9.55    | o |

|     |   |     |    |   |          |          |        |   |
|-----|---|-----|----|---|----------|----------|--------|---|
| 468 | 2 | -6  | -8 | 1 | 187.09   | 222.95   | 19.11  | o |
| 468 | 1 | 6   | 8  | 1 | 187.09   | 222.95   | 19.11  | o |
| 469 | 2 | -7  | -8 | 1 | 210.33   | 238.87   | 9.55   | o |
| 469 | 1 | 7   | 8  | 1 | 210.33   | 238.87   | 9.55   | o |
| 470 | 2 | -8  | -8 | 1 | 56.31    | 76.44    | 6.37   | o |
| 470 | 1 | 8   | 8  | 1 | 56.31    | 76.44    | 6.37   | o |
| 471 | 2 | -9  | -8 | 1 | 295.83   | 251.61   | 15.92  | o |
| 471 | 1 | 9   | 8  | 1 | 295.83   | 251.61   | 15.92  | o |
| 472 | 2 | -10 | -8 | 1 | 108.23   | 111.47   | 9.55   | o |
| 472 | 1 | 10  | 8  | 1 | 108.23   | 111.47   | 9.55   | o |
| 473 | 2 | -11 | -8 | 1 | 96.50    | 127.40   | 9.55   | o |
| 473 | 1 | 11  | 8  | 1 | 96.50    | 127.40   | 9.55   | o |
| 474 | 2 | -12 | -8 | 1 | 321.72   | 458.63   | 25.48  | o |
| 474 | 1 | 12  | 8  | 1 | 321.72   | 458.63   | 25.48  | o |
| 475 | 2 | -13 | -8 | 1 | 128.09   | 187.91   | 12.74  | o |
| 475 | 1 | 13  | 8  | 1 | 128.09   | 187.91   | 12.74  | o |
| 476 | 2 | 13  | -9 | 1 | 5.01     | 6.37     | 9.55   | < |
| 476 | 1 | -13 | 9  | 1 | 5.01     | 6.37     | 9.55   | < |
| 477 | 2 | 12  | -9 | 1 | 334.82   | 283.46   | 19.11  | o |
| 477 | 1 | -12 | 9  | 1 | 334.82   | 283.46   | 19.11  | o |
| 478 | 2 | 11  | -9 | 1 | 19.08    | 6.37     | 12.74  | < |
| 478 | 1 | -11 | 9  | 1 | 19.08    | 6.37     | 12.74  | < |
| 479 | 2 | 10  | -9 | 1 | 351.43   | 353.53   | 162.43 | < |
| 479 | 1 | -10 | 9  | 1 | 351.43   | 353.53   | 162.43 | < |
| 480 | 2 | 9   | -9 | 1 | 70.63    | 82.81    | 28.66  | < |
| 480 | 1 | -9  | 9  | 1 | 70.63    | 82.81    | 28.66  | < |
| 481 | 2 | 8   | -9 | 1 | 351.80   | 388.56   | 19.11  | o |
| 481 | 1 | -8  | 9  | 1 | 351.80   | 388.56   | 19.11  | o |
| 482 | 2 | 7   | -9 | 1 | 4736.72  | 4567.19  | 140.14 | o |
| 482 | 1 | -7  | 9  | 1 | 4736.72  | 4567.19  | 140.14 | o |
| 483 | 2 | 6   | -9 | 1 | 954.68   | 850.38   | 28.66  | o |
| 483 | 1 | -6  | 9  | 1 | 954.68   | 850.38   | 28.66  | o |
| 484 | 2 | 4   | -9 | 1 | 13576.70 | 13809.80 | 417.23 | o |
| 484 | 1 | -4  | 9  | 1 | 13576.70 | 13809.80 | 417.23 | o |
| 485 | 2 | 3   | -9 | 1 | 963.86   | 773.94   | 25.48  | o |
| 485 | 1 | -3  | 9  | 1 | 963.86   | 773.94   | 25.48  | o |
| 486 | 2 | 2   | -9 | 1 | 16072.70 | 17367.40 | 525.51 | o |
| 486 | 1 | -2  | 9  | 1 | 16072.70 | 17367.40 | 525.51 | o |
| 487 | 2 | 1   | -9 | 1 | 1033.13  | 1165.68  | 47.77  | o |
| 487 | 1 | -1  | 9  | 1 | 1033.13  | 1165.68  | 47.77  | o |
| 488 | 2 | -1  | -9 | 1 | 1058.69  | 1172.05  | 44.59  | o |
| 488 | 1 | 1   | 9  | 1 | 1058.69  | 1172.05  | 44.59  | o |
| 489 | 2 | -2  | -9 | 1 | 17506.90 | 17762.30 | 538.25 | o |
| 489 | 1 | 2   | 9  | 1 | 17506.90 | 17762.30 | 538.25 | o |
| 490 | 2 | -4  | -9 | 1 | 15183.50 | 14379.90 | 503.22 | o |
| 490 | 1 | 4   | 9  | 1 | 15183.50 | 14379.90 | 503.22 | o |
| 491 | 2 | -5  | -9 | 1 | 1673.01  | 1395.00  | 44.59  | o |
| 491 | 1 | 5   | 9  | 1 | 1673.01  | 1395.00  | 44.59  | o |
| 492 | 2 | -6  | -9 | 1 | 740.54   | 707.05   | 22.29  | o |
| 492 | 1 | 6   | 9  | 1 | 740.54   | 707.05   | 22.29  | o |
| 493 | 2 | -7  | -9 | 1 | 5518.58  | 5146.84  | 156.06 | o |
| 493 | 1 | 7   | 9  | 1 | 5518.58  | 5146.84  | 156.06 | o |
| 494 | 2 | -8  | -9 | 1 | 146.94   | 203.84   | 9.55   | o |
| 494 | 1 | 8   | 9  | 1 | 146.94   | 203.84   | 9.55   | o |
| 495 | 2 | -9  | -9 | 1 | 66.82    | 85.99    | 25.48  | o |
| 495 | 1 | 9   | 9  | 1 | 66.82    | 85.99    | 25.48  | o |
| 496 | 2 | -10 | -9 | 1 | 462.35   | 423.60   | 41.40  | o |
| 496 | 1 | 10  | 9  | 1 | 462.35   | 423.60   | 41.40  | o |

|     |   |     |     |   |         |         |         |   |
|-----|---|-----|-----|---|---------|---------|---------|---|
| 497 | 2 | -11 | -9  | 1 | 72.14   | 57.33   | 6.37    | o |
| 497 | 1 | 11  | 9   | 1 | 72.14   | 57.33   | 6.37    | o |
| 498 | 2 | -12 | -9  | 1 | 309.61  | 299.38  | 19.11   | o |
| 498 | 1 | 12  | 9   | 1 | 309.61  | 299.38  | 19.11   | o |
| 499 | 2 | -13 | -9  | 1 | 1.26    | 3.18    | 3.18    | < |
| 499 | 1 | 13  | 9   | 1 | 1.26    | 3.18    | 3.18    | < |
| 500 | 2 | 13  | -10 | 1 | 14.35   | 12.74   | 6.37    | < |
| 500 | 1 | -13 | 10  | 1 | 14.35   | 12.74   | 6.37    | < |
| 501 | 2 | 12  | -10 | 1 | 18.26   | 3.18    | 3.18    | < |
| 501 | 1 | -12 | 10  | 1 | 18.26   | 3.18    | 3.18    | < |
| 502 | 2 | 11  | -10 | 1 | 137.89  | 136.95  | 19.11   | o |
| 502 | 1 | -11 | 10  | 1 | 137.89  | 136.95  | 19.11   | o |
| 503 | 2 | 10  | -10 | 1 | 316.15  | 261.16  | 1028.73 | < |
| 503 | 1 | -10 | 10  | 1 | 316.15  | 261.16  | 1028.73 | < |
| 504 | 2 | 9   | -10 | 1 | 1.57    | 6.37    | 3.18    | < |
| 504 | 1 | -9  | 10  | 1 | 1.57    | 6.37    | 3.18    | < |
| 505 | 2 | 8   | -10 | 1 | 1142.88 | 1219.83 | 57.33   | o |
| 505 | 1 | -8  | 10  | 1 | 1142.88 | 1219.83 | 57.33   | o |
| 506 | 2 | 7   | -10 | 1 | 100.56  | 85.99   | 3.18    | o |
| 506 | 1 | -7  | 10  | 1 | 100.56  | 85.99   | 3.18    | o |
| 507 | 2 | 6   | -10 | 1 | 33.83   | 50.96   | 6.37    | o |
| 507 | 1 | -6  | 10  | 1 | 33.83   | 50.96   | 6.37    | o |
| 508 | 2 | 5   | -10 | 1 | 497.99  | 506.40  | 19.11   | o |
| 508 | 1 | -5  | 10  | 1 | 497.99  | 506.40  | 19.11   | o |
| 509 | 2 | 4   | -10 | 1 | 2558.04 | 2458.76 | 76.44   | o |
| 509 | 1 | -4  | 10  | 1 | 2558.04 | 2458.76 | 76.44   | o |
| 510 | 2 | 3   | -10 | 1 | 46.58   | 73.25   | 6.37    | o |
| 510 | 1 | -3  | 10  | 1 | 46.58   | 73.25   | 6.37    | o |
| 511 | 2 | 0   | -10 | 1 | 167.47  | 133.77  | 6.37    | o |
| 511 | 1 | 0   | 10  | 1 | 167.47  | 133.77  | 6.37    | o |
| 512 | 2 | -1  | -10 | 1 | 433.52  | 334.42  | 12.74   | o |
| 512 | 1 | 1   | 10  | 1 | 433.52  | 334.42  | 12.74   | o |
| 513 | 2 | -2  | -10 | 1 | 974.91  | 850.38  | 31.85   | o |
| 513 | 1 | 2   | 10  | 1 | 974.91  | 850.38  | 31.85   | o |
| 514 | 2 | -3  | -10 | 1 | 85.41   | 73.25   | 6.37    | o |
| 514 | 1 | 3   | 10  | 1 | 85.41   | 73.25   | 6.37    | o |
| 515 | 2 | -4  | -10 | 1 | 2152.13 | 2490.61 | 76.44   | o |
| 515 | 1 | 4   | 10  | 1 | 2152.13 | 2490.61 | 76.44   | o |
| 516 | 2 | -5  | -10 | 1 | 463.86  | 535.07  | 19.11   | o |
| 516 | 1 | 5   | 10  | 1 | 463.86  | 535.07  | 19.11   | o |
| 517 | 2 | -6  | -10 | 1 | 137.19  | 114.66  | 6.37    | o |
| 517 | 1 | 6   | 10  | 1 | 137.19  | 114.66  | 6.37    | o |
| 518 | 2 | -7  | -10 | 1 | 35.61   | 38.22   | 3.18    | o |
| 518 | 1 | 7   | 10  | 1 | 35.61   | 38.22   | 3.18    | o |
| 519 | 2 | -8  | -10 | 1 | 1118.14 | 1079.69 | 35.03   | o |
| 519 | 1 | 8   | 10  | 1 | 1118.14 | 1079.69 | 35.03   | o |
| 520 | 2 | -9  | -10 | 1 | 6.35    | 9.55    | 3.18    | o |
| 520 | 1 | 9   | 10  | 1 | 6.35    | 9.55    | 3.18    | o |
| 521 | 2 | -10 | -10 | 1 | 447.40  | 433.15  | 25.48   | o |
| 521 | 1 | 10  | 10  | 1 | 447.40  | 433.15  | 25.48   | o |
| 522 | 2 | -11 | -10 | 1 | 231.33  | 261.16  | 15.92   | o |
| 522 | 1 | 11  | 10  | 1 | 231.33  | 261.16  | 15.92   | o |
| 523 | 2 | -12 | -10 | 1 | 54.36   | 50.96   | 6.37    | o |
| 523 | 1 | 12  | 10  | 1 | 54.36   | 50.96   | 6.37    | o |
| 524 | 2 | -13 | -10 | 1 | 12.87   | 15.92   | 6.37    | < |
| 524 | 1 | 13  | 10  | 1 | 12.87   | 15.92   | 6.37    | < |
| 525 | 2 | 12  | -11 | 1 | 2584.27 | 3146.71 | 140.14  | o |
| 525 | 1 | -12 | 11  | 1 | 2584.27 | 3146.71 | 140.14  | o |

|     |   |     |     |   |          |          |         |   |
|-----|---|-----|-----|---|----------|----------|---------|---|
| 526 | 2 | 11  | -11 | 1 | 1886.97  | 2219.89  | 914.07  | < |
| 526 | 1 | -11 | 11  | 1 | 1886.97  | 2219.89  | 914.07  | < |
| 527 | 2 | 10  | -11 | 1 | 83.06    | 79.62    | 6.37    | o |
| 527 | 1 | -10 | 11  | 1 | 83.06    | 79.62    | 6.37    | o |
| 528 | 2 | 9   | -11 | 1 | 403.01   | 350.34   | 19.11   | o |
| 528 | 1 | -9  | 11  | 1 | 403.01   | 350.34   | 19.11   | o |
| 529 | 2 | 8   | -11 | 1 | 26470.70 | 26626.00 | 802.60  | o |
| 529 | 1 | -8  | 11  | 1 | 26470.70 | 26626.00 | 802.60  | o |
| 530 | 2 | 7   | -11 | 1 | 249.68   | 248.42   | 9.55    | o |
| 530 | 1 | -7  | 11  | 1 | 249.68   | 248.42   | 9.55    | o |
| 531 | 2 | 6   | -11 | 1 | 731.44   | 847.19   | 28.66   | o |
| 531 | 1 | -6  | 11  | 1 | 731.44   | 847.19   | 28.66   | o |
| 532 | 2 | 5   | -11 | 1 | 4122.74  | 4153.15  | 127.40  | o |
| 532 | 1 | -5  | 11  | 1 | 4122.74  | 4153.15  | 127.40  | o |
| 533 | 2 | 4   | -11 | 1 | 31263.30 | 33100.90 | 1066.95 | o |
| 533 | 1 | -4  | 11  | 1 | 31263.30 | 33100.90 | 1066.95 | o |
| 534 | 2 | 3   | -11 | 1 | 2002.22  | 2248.56  | 82.81   | o |
| 534 | 1 | -3  | 11  | 1 | 2002.22  | 2248.56  | 82.81   | o |
| 535 | 2 | 1   | -11 | 1 | 1761.12  | 1723.05  | 63.70   | o |
| 535 | 1 | -1  | 11  | 1 | 1761.12  | 1723.05  | 63.70   | o |
| 536 | 2 | -1  | -11 | 1 | 1485.94  | 1770.82  | 63.70   | o |
| 536 | 1 | 1   | 11  | 1 | 1485.94  | 1770.82  | 63.70   | o |
| 537 | 2 | -2  | -11 | 1 | 909.95   | 783.49   | 28.66   | o |
| 537 | 1 | 2   | 11  | 1 | 909.95   | 783.49   | 28.66   | o |
| 538 | 2 | -3  | -11 | 1 | 2967.72  | 2369.59  | 73.25   | o |
| 538 | 1 | 3   | 11  | 1 | 2967.72  | 2369.59  | 73.25   | o |
| 539 | 2 | -4  | -11 | 1 | 38724.50 | 36942.00 | 1286.71 | o |
| 539 | 1 | 4   | 11  | 1 | 38724.50 | 36942.00 | 1286.71 | o |
| 540 | 2 | -5  | -11 | 1 | 4450.98  | 4191.36  | 127.40  | o |
| 540 | 1 | 5   | 11  | 1 | 4450.98  | 4191.36  | 127.40  | o |
| 541 | 2 | -6  | -11 | 1 | 598.04   | 783.49   | 25.48   | o |
| 541 | 1 | 6   | 11  | 1 | 598.04   | 783.49   | 25.48   | o |
| 542 | 2 | -7  | -11 | 1 | 432.61   | 385.38   | 15.92   | o |
| 542 | 1 | 7   | 11  | 1 | 432.61   | 385.38   | 15.92   | o |
| 543 | 2 | -8  | -11 | 1 | 23694.40 | 24473.00 | 742.09  | o |
| 543 | 1 | 8   | 11  | 1 | 23694.40 | 24473.00 | 742.09  | o |
| 544 | 2 | -9  | -11 | 1 | 441.19   | 353.53   | 19.11   | o |
| 544 | 1 | 9   | 11  | 1 | 441.19   | 353.53   | 19.11   | o |
| 545 | 2 | -10 | -11 | 1 | 25.23    | 35.03    | 12.74   | < |
| 545 | 1 | 10  | 11  | 1 | 25.23    | 35.03    | 12.74   | < |
| 546 | 2 | -11 | -11 | 1 | 1821.00  | 2223.08  | 143.32  | o |
| 546 | 1 | 11  | 11  | 1 | 1821.00  | 2223.08  | 143.32  | o |
| 547 | 2 | -12 | -11 | 1 | 2230.63  | 2506.54  | 181.54  | o |
| 547 | 1 | 12  | 11  | 1 | 2230.63  | 2506.54  | 181.54  | o |
| 548 | 2 | -13 | -11 | 1 | 96.78    | 140.14   | 19.11   | o |
| 548 | 1 | 13  | 11  | 1 | 96.78    | 140.14   | 19.11   | o |
| 549 | 2 | 12  | -12 | 1 | 427.93   | 646.54   | 35.03   | o |
| 549 | 1 | -12 | 12  | 1 | 427.93   | 646.54   | 35.03   | o |
| 550 | 2 | 11  | -12 | 1 | 87.39    | 85.99    | 28.66   | o |
| 550 | 1 | -11 | 12  | 1 | 87.39    | 85.99    | 28.66   | o |
| 551 | 2 | 10  | -12 | 1 | 80.33    | 95.55    | 12.74   | o |
| 551 | 1 | -10 | 12  | 1 | 80.33    | 95.55    | 12.74   | o |
| 552 | 2 | 9   | -12 | 1 | 119.23   | 152.88   | 12.74   | o |
| 552 | 1 | -9  | 12  | 1 | 119.23   | 152.88   | 12.74   | o |
| 553 | 2 | 8   | -12 | 1 | 537.81   | 563.73   | 19.11   | o |
| 553 | 1 | -8  | 12  | 1 | 537.81   | 563.73   | 19.11   | o |
| 554 | 2 | 7   | -12 | 1 | 87.33    | 82.81    | 6.37    | o |
| 554 | 1 | -7  | 12  | 1 | 87.33    | 82.81    | 6.37    | o |

|     |   |     |     |   |          |          |         |   |
|-----|---|-----|-----|---|----------|----------|---------|---|
| 555 | 2 | 5   | -12 | 1 | 4.84     | 9.55     | 3.18    | o |
| 555 | 1 | -5  | 12  | 1 | 4.84     | 9.55     | 3.18    | o |
| 556 | 2 | 3   | -12 | 1 | 745.81   | 633.80   | 22.29   | o |
| 556 | 1 | -3  | 12  | 1 | 745.81   | 633.80   | 22.29   | o |
| 557 | 2 | 2   | -12 | 1 | 1761.53  | 1847.26  | 57.33   | o |
| 557 | 1 | -2  | 12  | 1 | 1761.53  | 1847.26  | 57.33   | o |
| 558 | 2 | 1   | -12 | 1 | 322.79   | 280.27   | 12.74   | o |
| 558 | 1 | -1  | 12  | 1 | 322.79   | 280.27   | 12.74   | o |
| 559 | 2 | 0   | -12 | 1 | 6513.24  | 6882.63  | 210.21  | o |
| 559 | 1 | 0   | 12  | 1 | 6513.24  | 6882.63  | 210.21  | o |
| 560 | 2 | -2  | -12 | 1 | 1758.98  | 1942.81  | 70.07   | o |
| 560 | 1 | 2   | 12  | 1 | 1758.98  | 1942.81  | 70.07   | o |
| 561 | 2 | -3  | -12 | 1 | 570.14   | 630.62   | 22.29   | o |
| 561 | 1 | 3   | 12  | 1 | 570.14   | 630.62   | 22.29   | o |
| 562 | 2 | -4  | -12 | 1 | 324.86   | 289.83   | 12.74   | o |
| 562 | 1 | 4   | 12  | 1 | 324.86   | 289.83   | 12.74   | o |
| 563 | 2 | -5  | -12 | 1 | 1.27     | 3.18     | 3.18    | < |
| 563 | 1 | 5   | 12  | 1 | 1.27     | 3.18     | 3.18    | < |
| 564 | 2 | -6  | -12 | 1 | 581.71   | 570.10   | 22.29   | o |
| 564 | 1 | 6   | 12  | 1 | 581.71   | 570.10   | 22.29   | o |
| 565 | 2 | -8  | -12 | 1 | 132.45   | 149.69   | 12.74   | o |
| 565 | 1 | 8   | 12  | 1 | 132.45   | 149.69   | 12.74   | o |
| 566 | 2 | -9  | -12 | 1 | 242.25   | 229.32   | 9.55    | o |
| 566 | 1 | 9   | 12  | 1 | 242.25   | 229.32   | 9.55    | o |
| 567 | 2 | -10 | -12 | 1 | 314.78   | 296.20   | 19.11   | o |
| 567 | 1 | 10  | 12  | 1 | 314.78   | 296.20   | 19.11   | o |
| 568 | 2 | -11 | -12 | 1 | 208.95   | 235.68   | 15.92   | o |
| 568 | 1 | 11  | 12  | 1 | 208.95   | 235.68   | 15.92   | o |
| 569 | 2 | -12 | -12 | 1 | 122.24   | 25.48    | 70.07   | < |
| 569 | 1 | 12  | 12  | 1 | 122.24   | 25.48    | 70.07   | < |
| 570 | 2 | 12  | -13 | 1 | 49.72    | 54.14    | 9.55    | o |
| 570 | 1 | -12 | 13  | 1 | 49.72    | 54.14    | 9.55    | o |
| 571 | 2 | 11  | -13 | 1 | 0.87     | 3.18     | 6.37    | < |
| 571 | 1 | -11 | 13  | 1 | 0.87     | 3.18     | 6.37    | < |
| 572 | 2 | 10  | -13 | 1 | 498.14   | 566.92   | 175.17  | o |
| 572 | 1 | -10 | 13  | 1 | 498.14   | 566.92   | 175.17  | o |
| 573 | 2 | 9   | -13 | 1 | 1899.75  | 2000.13  | 1178.42 | < |
| 573 | 1 | -9  | 13  | 1 | 1899.75  | 2000.13  | 1178.42 | < |
| 574 | 2 | 8   | -13 | 1 | 13738.80 | 13313.00 | 404.49  | o |
| 574 | 1 | -8  | 13  | 1 | 13738.80 | 13313.00 | 404.49  | o |
| 575 | 2 | 7   | -13 | 1 | 20.96    | 28.66    | 3.18    | o |
| 575 | 1 | -7  | 13  | 1 | 20.96    | 28.66    | 3.18    | o |
| 576 | 2 | 6   | -13 | 1 | 810.19   | 824.90   | 31.85   | o |
| 576 | 1 | -6  | 13  | 1 | 810.19   | 824.90   | 31.85   | o |
| 577 | 2 | 5   | -13 | 1 | 71.13    | 66.88    | 3.18    | o |
| 577 | 1 | -5  | 13  | 1 | 71.13    | 66.88    | 3.18    | o |
| 578 | 2 | 4   | -13 | 1 | 6266.37  | 5328.38  | 162.43  | o |
| 578 | 1 | -4  | 13  | 1 | 6266.37  | 5328.38  | 162.43  | o |
| 579 | 2 | 1   | -13 | 1 | 5031.75  | 5618.21  | 171.99  | o |
| 579 | 1 | -1  | 13  | 1 | 5031.75  | 5618.21  | 171.99  | o |
| 580 | 2 | -1  | -13 | 1 | 5758.28  | 5640.51  | 171.99  | o |
| 580 | 1 | 1   | 13  | 1 | 5758.28  | 5640.51  | 171.99  | o |
| 581 | 2 | -2  | -13 | 1 | 1436.22  | 1554.24  | 47.77   | o |
| 581 | 1 | 2   | 13  | 1 | 1436.22  | 1554.24  | 47.77   | o |
| 582 | 2 | -3  | -13 | 1 | 572.03   | 550.99   | 19.11   | o |
| 582 | 1 | 3   | 13  | 1 | 572.03   | 550.99   | 19.11   | o |
| 583 | 2 | -5  | -13 | 1 | 116.90   | 85.99    | 6.37    | o |
| 583 | 1 | 5   | 13  | 1 | 116.90   | 85.99    | 6.37    | o |



|     |   |     |     |   |          |          |        |   |
|-----|---|-----|-----|---|----------|----------|--------|---|
| 584 | 2 | -6  | -13 | 1 | 493.85   | 700.68   | 28.66  | o |
| 584 | 1 | 6   | 13  | 1 | 493.85   | 700.68   | 28.66  | o |
| 585 | 2 | -7  | -13 | 1 | 10.06    | 22.29    | 3.18   | o |
| 585 | 1 | 7   | 13  | 1 | 10.06    | 22.29    | 3.18   | o |
| 586 | 2 | -8  | -13 | 1 | 13425.20 | 13379.90 | 468.18 | o |
| 586 | 1 | 8   | 13  | 1 | 13425.20 | 13379.90 | 468.18 | o |
| 587 | 2 | -9  | -13 | 1 | 1824.46  | 1649.79  | 54.14  | o |
| 587 | 1 | 9   | 13  | 1 | 1824.46  | 1649.79  | 54.14  | o |
| 588 | 2 | -10 | -13 | 1 | 325.97   | 302.57   | 28.66  | o |
| 588 | 1 | 10  | 13  | 1 | 325.97   | 302.57   | 28.66  | o |
| 589 | 2 | -11 | -13 | 1 | 0.67     | 6.37     | 3.18   | < |
| 589 | 1 | 11  | 13  | 1 | 0.67     | 6.37     | 3.18   | < |
| 590 | 2 | -12 | -13 | 1 | 90.93    | 95.55    | 9.55   | o |
| 590 | 1 | 12  | 13  | 1 | 90.93    | 95.55    | 9.55   | o |
| 591 | 2 | 12  | -14 | 1 | 281.27   | 353.53   | 101.92 | o |
| 591 | 1 | -12 | 14  | 1 | 281.27   | 353.53   | 101.92 | o |
| 592 | 2 | 11  | -14 | 1 | 24.68    | 22.29    | 6.37   | o |
| 592 | 1 | -11 | 14  | 1 | 24.68    | 22.29    | 6.37   | o |
| 593 | 2 | 10  | -14 | 1 | 129.72   | 146.51   | 19.11  | o |
| 593 | 1 | -10 | 14  | 1 | 129.72   | 146.51   | 19.11  | o |
| 594 | 2 | 9   | -14 | 1 | 203.55   | 213.39   | 9.55   | o |
| 594 | 1 | -9  | 14  | 1 | 203.55   | 213.39   | 9.55   | o |
| 595 | 2 | 8   | -14 | 1 | 207.07   | 213.39   | 9.55   | o |
| 595 | 1 | -8  | 14  | 1 | 207.07   | 213.39   | 9.55   | o |
| 596 | 2 | 7   | -14 | 1 | 27.30    | 31.85    | 6.37   | o |
| 596 | 1 | -7  | 14  | 1 | 27.30    | 31.85    | 6.37   | o |
| 597 | 2 | 6   | -14 | 1 | 14.20    | 19.11    | 3.18   | o |
| 597 | 1 | -6  | 14  | 1 | 14.20    | 19.11    | 3.18   | o |
| 598 | 2 | 5   | -14 | 1 | 147.60   | 117.84   | 6.37   | o |
| 598 | 1 | -5  | 14  | 1 | 147.60   | 117.84   | 6.37   | o |
| 599 | 2 | 4   | -14 | 1 | 257.94   | 257.98   | 9.55   | o |
| 599 | 1 | -4  | 14  | 1 | 257.94   | 257.98   | 9.55   | o |
| 600 | 2 | 3   | -14 | 1 | 127.21   | 117.84   | 6.37   | o |
| 600 | 1 | -3  | 14  | 1 | 127.21   | 117.84   | 6.37   | o |
| 601 | 2 | 2   | -14 | 1 | 2701.57  | 2888.73  | 89.18  | o |
| 601 | 1 | -2  | 14  | 1 | 2701.57  | 2888.73  | 89.18  | o |
| 602 | 2 | 1   | -14 | 1 | 437.36   | 423.60   | 15.92  | o |
| 602 | 1 | -1  | 14  | 1 | 437.36   | 423.60   | 15.92  | o |
| 603 | 2 | 0   | -14 | 1 | 18.34    | 25.48    | 3.18   | o |
| 603 | 1 | 0   | 14  | 1 | 18.34    | 25.48    | 3.18   | o |
| 604 | 2 | -1  | -14 | 1 | 377.06   | 401.30   | 15.92  | o |
| 604 | 1 | 1   | 14  | 1 | 377.06   | 401.30   | 15.92  | o |
| 605 | 2 | -2  | -14 | 1 | 2917.94  | 2764.52  | 98.73  | o |
| 605 | 1 | 2   | 14  | 1 | 2917.94  | 2764.52  | 98.73  | o |
| 606 | 2 | -3  | -14 | 1 | 96.85    | 111.47   | 6.37   | o |
| 606 | 1 | 3   | 14  | 1 | 96.85    | 111.47   | 6.37   | o |
| 607 | 2 | -5  | -14 | 1 | 151.50   | 130.58   | 6.37   | o |
| 607 | 1 | 5   | 14  | 1 | 151.50   | 130.58   | 6.37   | o |
| 608 | 2 | -6  | -14 | 1 | 21.15    | 12.74    | 3.18   | o |
| 608 | 1 | 6   | 14  | 1 | 21.15    | 12.74    | 3.18   | o |
| 609 | 2 | -7  | -14 | 1 | 15.73    | 15.92    | 3.18   | o |
| 609 | 1 | 7   | 14  | 1 | 15.73    | 15.92    | 3.18   | o |
| 610 | 2 | -8  | -14 | 1 | 143.80   | 143.32   | 9.55   | o |
| 610 | 1 | 8   | 14  | 1 | 143.80   | 143.32   | 9.55   | o |
| 611 | 2 | -9  | -14 | 1 | 129.00   | 98.73    | 6.37   | o |
| 611 | 1 | 9   | 14  | 1 | 129.00   | 98.73    | 6.37   | o |
| 612 | 2 | -10 | -14 | 1 | 155.07   | 162.43   | 76.44  | < |
| 612 | 1 | 10  | 14  | 1 | 155.07   | 162.43   | 76.44  | < |

|     |   |     |     |   |          |          |         |   |
|-----|---|-----|-----|---|----------|----------|---------|---|
| 613 | 2 | -11 | -14 | 1 | 55.90    | 66.88    | 6.37    | o |
| 613 | 1 | 11  | 14  | 1 | 55.90    | 66.88    | 6.37    | o |
| 614 | 2 | -12 | -14 | 1 | 265.54   | 337.60   | 175.17  | < |
| 614 | 1 | 12  | 14  | 1 | 265.54   | 337.60   | 175.17  | < |
| 615 | 2 | 12  | -15 | 1 | 24.03    | 70.07    | 25.48   | < |
| 615 | 1 | -12 | 15  | 1 | 24.03    | 70.07    | 25.48   | < |
| 616 | 2 | 11  | -15 | 1 | 0.62     | 6.37     | 3.18    | < |
| 616 | 1 | -11 | 15  | 1 | 0.62     | 6.37     | 3.18    | < |
| 617 | 2 | 10  | -15 | 1 | 1658.19  | 1751.71  | 85.99   | o |
| 617 | 1 | -10 | 15  | 1 | 1658.19  | 1751.71  | 85.99   | o |
| 618 | 2 | 9   | -15 | 1 | 672.22   | 586.03   | 22.29   | o |
| 618 | 1 | -9  | 15  | 1 | 672.22   | 586.03   | 22.29   | o |
| 619 | 2 | 8   | -15 | 1 | 819.38   | 722.98   | 35.03   | o |
| 619 | 1 | -8  | 15  | 1 | 819.38   | 722.98   | 35.03   | o |
| 620 | 2 | 7   | -15 | 1 | 24.94    | 31.85    | 3.18    | o |
| 620 | 1 | -7  | 15  | 1 | 24.94    | 31.85    | 3.18    | o |
| 621 | 2 | 6   | -15 | 1 | 2834.79  | 3251.81  | 143.32  | o |
| 621 | 1 | -6  | 15  | 1 | 2834.79  | 3251.81  | 143.32  | o |
| 622 | 2 | 5   | -15 | 1 | 464.57   | 452.26   | 15.92   | o |
| 622 | 1 | -5  | 15  | 1 | 464.57   | 452.26   | 15.92   | o |
| 623 | 2 | 4   | -15 | 1 | 2017.38  | 2245.37  | 70.07   | o |
| 623 | 1 | -4  | 15  | 1 | 2017.38  | 2245.37  | 70.07   | o |
| 624 | 2 | 3   | -15 | 1 | 1551.78  | 1522.40  | 47.77   | o |
| 624 | 1 | -3  | 15  | 1 | 1551.78  | 1522.40  | 47.77   | o |
| 625 | 2 | 2   | -15 | 1 | 34930.80 | 33690.20 | 1086.06 | o |
| 625 | 1 | -2  | 15  | 1 | 34930.80 | 33690.20 | 1086.06 | o |
| 626 | 2 | 1   | -15 | 1 | 3149.49  | 3901.54  | 121.03  | o |
| 626 | 1 | -1  | 15  | 1 | 3149.49  | 3901.54  | 121.03  | o |
| 627 | 2 | -1  | -15 | 1 | 4341.81  | 4102.19  | 127.40  | o |
| 627 | 1 | 1   | 15  | 1 | 4341.81  | 4102.19  | 127.40  | o |
| 628 | 2 | -2  | -15 | 1 | 33822.00 | 33323.90 | 1162.50 | o |
| 628 | 1 | 2   | 15  | 1 | 33822.00 | 33323.90 | 1162.50 | o |
| 629 | 2 | -3  | -15 | 1 | 1498.55  | 1551.06  | 50.96   | o |
| 629 | 1 | 3   | 15  | 1 | 1498.55  | 1551.06  | 50.96   | o |
| 630 | 2 | -4  | -15 | 1 | 2995.72  | 2468.32  | 76.44   | o |
| 630 | 1 | 4   | 15  | 1 | 2995.72  | 2468.32  | 76.44   | o |
| 631 | 2 | -5  | -15 | 1 | 416.82   | 433.15   | 19.11   | o |
| 631 | 1 | 5   | 15  | 1 | 416.82   | 433.15   | 19.11   | o |
| 632 | 2 | -6  | -15 | 1 | 2807.50  | 3360.10  | 105.10  | o |
| 632 | 1 | 6   | 15  | 1 | 2807.50  | 3360.10  | 105.10  | o |
| 633 | 2 | -7  | -15 | 1 | 50.03    | 44.59    | 6.37    | o |
| 633 | 1 | 7   | 15  | 1 | 50.03    | 44.59    | 6.37    | o |
| 634 | 2 | -8  | -15 | 1 | 1130.61  | 939.55   | 31.85   | o |
| 634 | 1 | 8   | 15  | 1 | 1130.61  | 939.55   | 31.85   | o |
| 635 | 2 | -9  | -15 | 1 | 662.10   | 522.33   | 19.11   | o |
| 635 | 1 | 9   | 15  | 1 | 662.10   | 522.33   | 19.11   | o |
| 636 | 2 | -10 | -15 | 1 | 1138.17  | 850.38   | 60.51   | o |
| 636 | 1 | 10  | 15  | 1 | 1138.17  | 850.38   | 60.51   | o |
| 637 | 2 | -11 | -15 | 1 | 2.08     | 19.11    | 6.37    | o |
| 637 | 1 | 11  | 15  | 1 | 2.08     | 19.11    | 6.37    | o |
| 638 | 2 | -12 | -15 | 1 | 31.43    | 60.51    | 9.55    | o |
| 638 | 1 | 12  | 15  | 1 | 31.43    | 60.51    | 9.55    | o |
| 639 | 2 | 12  | -16 | 1 | 44.36    | 60.51    | 9.55    | o |
| 639 | 1 | -12 | 16  | 1 | 44.36    | 60.51    | 9.55    | o |
| 640 | 2 | 11  | -16 | 1 | 21.11    | 22.29    | 19.11   | < |
| 640 | 1 | -11 | 16  | 1 | 21.11    | 22.29    | 19.11   | < |
| 641 | 2 | 10  | -16 | 1 | 37.38    | 31.85    | 6.37    | o |
| 641 | 1 | -10 | 16  | 1 | 37.38    | 31.85    | 6.37    | o |

|     |   |     |     |   |         |         |        |   |
|-----|---|-----|-----|---|---------|---------|--------|---|
| 642 | 2 | 9   | -16 | 1 | 166.46  | 130.58  | 15.92  | o |
| 642 | 1 | -9  | 16  | 1 | 166.46  | 130.58  | 15.92  | o |
| 643 | 2 | 8   | -16 | 1 | 217.38  | 238.87  | 15.92  | o |
| 643 | 1 | -8  | 16  | 1 | 217.38  | 238.87  | 15.92  | o |
| 644 | 2 | 7   | -16 | 1 | 28.02   | 35.03   | 6.37   | o |
| 644 | 1 | -7  | 16  | 1 | 28.02   | 35.03   | 6.37   | o |
| 645 | 2 | 6   | -16 | 1 | 4027.38 | 3930.20 | 152.88 | o |
| 645 | 1 | -6  | 16  | 1 | 4027.38 | 3930.20 | 152.88 | o |
| 646 | 2 | 5   | -16 | 1 | 297.61  | 229.32  | 9.55   | o |
| 646 | 1 | -5  | 16  | 1 | 297.61  | 229.32  | 9.55   | o |
| 647 | 2 | 3   | -16 | 1 | 133.30  | 133.77  | 6.37   | o |
| 647 | 1 | -3  | 16  | 1 | 133.30  | 133.77  | 6.37   | o |
| 648 | 2 | 2   | -16 | 1 | 82.36   | 117.84  | 6.37   | o |
| 648 | 1 | -2  | 16  | 1 | 82.36   | 117.84  | 6.37   | o |
| 649 | 2 | 1   | -16 | 1 | 375.62  | 452.26  | 15.92  | o |
| 649 | 1 | -1  | 16  | 1 | 375.62  | 452.26  | 15.92  | o |
| 650 | 2 | 0   | -16 | 1 | 4521.97 | 4923.90 | 152.88 | o |
| 650 | 1 | 0   | 16  | 1 | 4521.97 | 4923.90 | 152.88 | o |
| 651 | 2 | -1  | -16 | 1 | 449.47  | 429.96  | 15.92  | o |
| 651 | 1 | 1   | 16  | 1 | 449.47  | 429.96  | 15.92  | o |
| 652 | 2 | -2  | -16 | 1 | 110.99  | 117.84  | 6.37   | o |
| 652 | 1 | 2   | 16  | 1 | 110.99  | 117.84  | 6.37   | o |
| 653 | 2 | -3  | -16 | 1 | 131.46  | 133.77  | 6.37   | o |
| 653 | 1 | 3   | 16  | 1 | 131.46  | 133.77  | 6.37   | o |
| 654 | 2 | -4  | -16 | 1 | 1896.84 | 1592.46 | 57.33  | o |
| 654 | 1 | 4   | 16  | 1 | 1896.84 | 1592.46 | 57.33  | o |
| 655 | 2 | -5  | -16 | 1 | 156.18  | 187.91  | 9.55   | o |
| 655 | 1 | 5   | 16  | 1 | 156.18  | 187.91  | 9.55   | o |
| 656 | 2 | -6  | -16 | 1 | 3050.87 | 3477.94 | 127.40 | o |
| 656 | 1 | 6   | 16  | 1 | 3050.87 | 3477.94 | 127.40 | o |
| 657 | 2 | -7  | -16 | 1 | 7.95    | 22.29   | 3.18   | o |
| 657 | 1 | 7   | 16  | 1 | 7.95    | 22.29   | 3.18   | o |
| 658 | 2 | -8  | -16 | 1 | 629.89  | 525.51  | 22.29  | o |
| 658 | 1 | 8   | 16  | 1 | 629.89  | 525.51  | 22.29  | o |
| 659 | 2 | -9  | -16 | 1 | 407.48  | 407.67  | 19.11  | o |
| 659 | 1 | 9   | 16  | 1 | 407.48  | 407.67  | 19.11  | o |
| 660 | 2 | -10 | -16 | 1 | 42.56   | 57.33   | 6.37   | o |
| 660 | 1 | 10  | 16  | 1 | 42.56   | 57.33   | 6.37   | o |
| 661 | 2 | -11 | -16 | 1 | 49.84   | 73.25   | 22.29  | o |
| 661 | 1 | 11  | 16  | 1 | 49.84   | 73.25   | 22.29  | o |
| 662 | 2 | -12 | -16 | 1 | 37.31   | 60.51   | 9.55   | o |
| 662 | 1 | 12  | 16  | 1 | 37.31   | 60.51   | 9.55   | o |
| 663 | 2 | 12  | -17 | 1 | 32.91   | 31.85   | 19.11  | < |
| 663 | 1 | -12 | 17  | 1 | 32.91   | 31.85   | 19.11  | < |
| 664 | 2 | 11  | -17 | 1 | 73.32   | 92.36   | 9.55   | o |
| 664 | 1 | -11 | 17  | 1 | 73.32   | 92.36   | 9.55   | o |
| 665 | 2 | 10  | -17 | 1 | 1543.36 | 1570.17 | 73.25  | o |
| 665 | 1 | -10 | 17  | 1 | 1543.36 | 1570.17 | 73.25  | o |
| 666 | 2 | 9   | -17 | 1 | 9.34    | 6.37    | 3.18   | < |
| 666 | 1 | -9  | 17  | 1 | 9.34    | 6.37    | 3.18   | < |
| 667 | 2 | 8   | -17 | 1 | 2370.00 | 2410.99 | 89.18  | o |
| 667 | 1 | -8  | 17  | 1 | 2370.00 | 2410.99 | 89.18  | o |
| 668 | 2 | 7   | -17 | 1 | 3225.41 | 3468.39 | 108.29 | o |
| 668 | 1 | -7  | 17  | 1 | 3225.41 | 3468.39 | 108.29 | o |
| 669 | 2 | 6   | -17 | 1 | 2072.50 | 1840.89 | 60.51  | o |
| 669 | 1 | -6  | 17  | 1 | 2072.50 | 1840.89 | 60.51  | o |
| 670 | 2 | 5   | -17 | 1 | 60.68   | 70.07   | 6.37   | o |
| 670 | 1 | -5  | 17  | 1 | 60.68   | 70.07   | 6.37   | o |

|     |   |     |     |   |          |          |        |   |
|-----|---|-----|-----|---|----------|----------|--------|---|
| 671 | 2 | 4   | -17 | 1 | 1380.20  | 1611.57  | 50.96  | o |
| 671 | 1 | -4  | 17  | 1 | 1380.20  | 1611.57  | 50.96  | o |
| 672 | 2 | 3   | -17 | 1 | 2840.89  | 2742.22  | 85.99  | o |
| 672 | 1 | -3  | 17  | 1 | 2840.89  | 2742.22  | 85.99  | o |
| 673 | 2 | 2   | -17 | 1 | 11812.10 | 13026.40 | 455.45 | o |
| 673 | 1 | -2  | 17  | 1 | 11812.10 | 13026.40 | 455.45 | o |
| 674 | 2 | 1   | -17 | 1 | 633.83   | 506.40   | 19.11  | o |
| 674 | 1 | -1  | 17  | 1 | 633.83   | 506.40   | 19.11  | o |
| 675 | 2 | 0   | -17 | 1 | 389.12   | 525.51   | 19.11  | o |
| 675 | 1 | 0   | 17  | 1 | 389.12   | 525.51   | 19.11  | o |
| 676 | 2 | -2  | -17 | 1 | 15609.40 | 14399.10 | 506.40 | o |
| 676 | 1 | 2   | 17  | 1 | 15609.40 | 14399.10 | 506.40 | o |
| 677 | 2 | -3  | -17 | 1 | 2988.22  | 2828.22  | 89.18  | o |
| 677 | 1 | 3   | 17  | 1 | 2988.22  | 2828.22  | 89.18  | o |
| 678 | 2 | -5  | -17 | 1 | 20.13    | 66.88    | 19.11  | o |
| 678 | 1 | 5   | 17  | 1 | 20.13    | 66.88    | 19.11  | o |
| 679 | 2 | -7  | -17 | 1 | 3229.52  | 3605.34  | 121.03 | o |
| 679 | 1 | 7   | 17  | 1 | 3229.52  | 3605.34  | 121.03 | o |
| 680 | 2 | -8  | -17 | 1 | 2118.58  | 2140.27  | 76.44  | o |
| 680 | 1 | 8   | 17  | 1 | 2118.58  | 2140.27  | 76.44  | o |
| 681 | 2 | -9  | -17 | 1 | 31.95    | 31.85    | 3.18   | o |
| 681 | 1 | 9   | 17  | 1 | 31.95    | 31.85    | 3.18   | o |
| 682 | 2 | -10 | -17 | 1 | 1508.01  | 1273.97  | 47.77  | o |
| 682 | 1 | 10  | 17  | 1 | 1508.01  | 1273.97  | 47.77  | o |
| 683 | 2 | -11 | -17 | 1 | 40.78    | 57.33    | 9.55   | o |
| 683 | 1 | 11  | 17  | 1 | 40.78    | 57.33    | 9.55   | o |
| 684 | 2 | -12 | -17 | 1 | 126.70   | 152.88   | 12.74  | o |
| 684 | 1 | 12  | 17  | 1 | 126.70   | 152.88   | 12.74  | o |
| 685 | 2 | 12  | -18 | 1 | 28.69    | 28.66    | 6.37   | o |
| 685 | 1 | -12 | 18  | 1 | 28.69    | 28.66    | 6.37   | o |
| 686 | 2 | 11  | -18 | 1 | 20.16    | 25.48    | 6.37   | o |
| 686 | 1 | -11 | 18  | 1 | 20.16    | 25.48    | 6.37   | o |
| 687 | 2 | 10  | -18 | 1 | 703.58   | 840.82   | 70.07  | o |
| 687 | 1 | -10 | 18  | 1 | 703.58   | 840.82   | 70.07  | o |
| 688 | 2 | 9   | -18 | 1 | 16.91    | 9.55     | 3.18   | o |
| 688 | 1 | -9  | 18  | 1 | 16.91    | 9.55     | 3.18   | o |
| 689 | 2 | 8   | -18 | 1 | 108.31   | 121.03   | 6.37   | o |
| 689 | 1 | -8  | 18  | 1 | 108.31   | 121.03   | 6.37   | o |
| 690 | 2 | 7   | -18 | 1 | 5.44     | 6.37     | 3.18   | < |
| 690 | 1 | -7  | 18  | 1 | 5.44     | 6.37     | 3.18   | < |
| 691 | 2 | 6   | -18 | 1 | 40.10    | 41.40    | 3.18   | o |
| 691 | 1 | -6  | 18  | 1 | 40.10    | 41.40    | 3.18   | o |
| 692 | 2 | 5   | -18 | 1 | 559.41   | 560.55   | 22.29  | o |
| 692 | 1 | -5  | 18  | 1 | 559.41   | 560.55   | 22.29  | o |
| 693 | 2 | 4   | -18 | 1 | 523.60   | 675.21   | 25.48  | o |
| 693 | 1 | -4  | 18  | 1 | 523.60   | 675.21   | 25.48  | o |
| 694 | 2 | 3   | -18 | 1 | 113.10   | 89.18    | 6.37   | o |
| 694 | 1 | -3  | 18  | 1 | 113.10   | 89.18    | 6.37   | o |
| 695 | 2 | 2   | -18 | 1 | 998.35   | 1133.83  | 38.22  | o |
| 695 | 1 | -2  | 18  | 1 | 998.35   | 1133.83  | 38.22  | o |
| 696 | 2 | 1   | -18 | 1 | 357.81   | 366.27   | 15.92  | o |
| 696 | 1 | -1  | 18  | 1 | 357.81   | 366.27   | 15.92  | o |
| 697 | 2 | 0   | -18 | 1 | 737.78   | 780.31   | 38.22  | o |
| 697 | 1 | 0   | 18  | 1 | 737.78   | 780.31   | 38.22  | o |
| 698 | 2 | -1  | -18 | 1 | 418.78   | 359.90   | 15.92  | o |
| 698 | 1 | 1   | 18  | 1 | 418.78   | 359.90   | 15.92  | o |
| 699 | 2 | -2  | -18 | 1 | 1199.56  | 1159.31  | 38.22  | o |
| 699 | 1 | 2   | 18  | 1 | 1199.56  | 1159.31  | 38.22  | o |

|     |   |     |     |   |         |         |        |   |
|-----|---|-----|-----|---|---------|---------|--------|---|
| 700 | 2 | -3  | -18 | 1 | 85.88   | 98.73   | 6.37   | o |
| 700 | 1 | 3   | 18  | 1 | 85.88   | 98.73   | 6.37   | o |
| 701 | 2 | -4  | -18 | 1 | 814.94  | 786.68  | 28.66  | o |
| 701 | 1 | 4   | 18  | 1 | 814.94  | 786.68  | 28.66  | o |
| 702 | 2 | -5  | -18 | 1 | 508.60  | 509.59  | 19.11  | o |
| 702 | 1 | 5   | 18  | 1 | 508.60  | 509.59  | 19.11  | o |
| 703 | 2 | -6  | -18 | 1 | 13.43   | 31.85   | 3.18   | o |
| 703 | 1 | 6   | 18  | 1 | 13.43   | 31.85   | 3.18   | o |
| 704 | 2 | -7  | -18 | 1 | 17.00   | 19.11   | 3.18   | o |
| 704 | 1 | 7   | 18  | 1 | 17.00   | 19.11   | 3.18   | o |
| 705 | 2 | -8  | -18 | 1 | 352.57  | 318.49  | 12.74  | o |
| 705 | 1 | 8   | 18  | 1 | 352.57  | 318.49  | 12.74  | o |
| 706 | 2 | -9  | -18 | 1 | 67.55   | 66.88   | 6.37   | o |
| 706 | 1 | 9   | 18  | 1 | 67.55   | 66.88   | 6.37   | o |
| 707 | 2 | -10 | -18 | 1 | 316.06  | 254.79  | 82.81  | o |
| 707 | 1 | 10  | 18  | 1 | 316.06  | 254.79  | 82.81  | o |
| 708 | 2 | -11 | -18 | 1 | 25.24   | 35.03   | 6.37   | o |
| 708 | 1 | 11  | 18  | 1 | 25.24   | 35.03   | 6.37   | o |
| 709 | 2 | -12 | -18 | 1 | 45.59   | 76.44   | 9.55   | o |
| 709 | 1 | 12  | 18  | 1 | 45.59   | 76.44   | 9.55   | o |
| 710 | 2 | 12  | -19 | 1 | 525.10  | 672.02  | 130.58 | o |
| 710 | 1 | -12 | 19  | 1 | 525.10  | 672.02  | 130.58 | o |
| 711 | 2 | 11  | -19 | 1 | 14.73   | 28.66   | 6.37   | o |
| 711 | 1 | -11 | 19  | 1 | 14.73   | 28.66   | 6.37   | o |
| 712 | 2 | 10  | -19 | 1 | 743.98  | 662.47  | 79.62  | o |
| 712 | 1 | -10 | 19  | 1 | 743.98  | 662.47  | 79.62  | o |
| 713 | 2 | 9   | -19 | 1 | 283.48  | 299.38  | 25.48  | o |
| 713 | 1 | -9  | 19  | 1 | 283.48  | 299.38  | 25.48  | o |
| 714 | 2 | 8   | -19 | 1 | 296.37  | 273.90  | 35.03  | o |
| 714 | 1 | -8  | 19  | 1 | 296.37  | 273.90  | 35.03  | o |
| 715 | 2 | 7   | -19 | 1 | 266.97  | 270.72  | 12.74  | o |
| 715 | 1 | -7  | 19  | 1 | 266.97  | 270.72  | 12.74  | o |
| 716 | 2 | 6   | -19 | 1 | 70.82   | 105.10  | 6.37   | o |
| 716 | 1 | -6  | 19  | 1 | 70.82   | 105.10  | 6.37   | o |
| 717 | 2 | 5   | -19 | 1 | 22.28   | 31.85   | 3.18   | o |
| 717 | 1 | -5  | 19  | 1 | 22.28   | 31.85   | 3.18   | o |
| 718 | 2 | 4   | -19 | 1 | 1770.27 | 1579.72 | 50.96  | o |
| 718 | 1 | -4  | 19  | 1 | 1770.27 | 1579.72 | 50.96  | o |
| 719 | 2 | 3   | -19 | 1 | 63.37   | 82.81   | 6.37   | o |
| 719 | 1 | -3  | 19  | 1 | 63.37   | 82.81   | 6.37   | o |
| 720 | 2 | 2   | -19 | 1 | 1217.75 | 1242.12 | 47.77  | o |
| 720 | 1 | -2  | 19  | 1 | 1217.75 | 1242.12 | 47.77  | o |
| 721 | 2 | 1   | -19 | 1 | 2613.99 | 2633.93 | 95.55  | o |
| 721 | 1 | -1  | 19  | 1 | 2613.99 | 2633.93 | 95.55  | o |
| 722 | 2 | -1  | -19 | 1 | 2856.14 | 2761.33 | 98.73  | o |
| 722 | 1 | 1   | 19  | 1 | 2856.14 | 2761.33 | 98.73  | o |
| 723 | 2 | -2  | -19 | 1 | 1037.18 | 1184.79 | 38.22  | o |
| 723 | 1 | 2   | 19  | 1 | 1037.18 | 1184.79 | 38.22  | o |
| 724 | 2 | -3  | -19 | 1 | 58.32   | 82.81   | 6.37   | o |
| 724 | 1 | 3   | 19  | 1 | 58.32   | 82.81   | 6.37   | o |
| 725 | 2 | -4  | -19 | 1 | 1715.81 | 1659.35 | 57.33  | o |
| 725 | 1 | 4   | 19  | 1 | 1715.81 | 1659.35 | 57.33  | o |
| 726 | 2 | -5  | -19 | 1 | 17.98   | 31.85   | 3.18   | o |
| 726 | 1 | 5   | 19  | 1 | 17.98   | 31.85   | 3.18   | o |
| 727 | 2 | -6  | -19 | 1 | 143.04  | 133.77  | 6.37   | o |
| 727 | 1 | 6   | 19  | 1 | 143.04  | 133.77  | 6.37   | o |
| 728 | 2 | -7  | -19 | 1 | 305.07  | 248.42  | 12.74  | o |
| 728 | 1 | 7   | 19  | 1 | 305.07  | 248.42  | 12.74  | o |

|     |   |     |     |   |         |         |       |   |
|-----|---|-----|-----|---|---------|---------|-------|---|
| 729 | 2 | -8  | -19 | 1 | 378.81  | 375.82  | 19.11 | o |
| 729 | 1 | 8   | 19  | 1 | 378.81  | 375.82  | 19.11 | o |
| 730 | 2 | -9  | -19 | 1 | 388.23  | 347.16  | 19.11 | o |
| 730 | 1 | 9   | 19  | 1 | 388.23  | 347.16  | 19.11 | o |
| 731 | 2 | -10 | -19 | 1 | 599.55  | 636.98  | 35.03 | o |
| 731 | 1 | 10  | 19  | 1 | 599.55  | 636.98  | 35.03 | o |
| 732 | 2 | -11 | -19 | 1 | 32.97   | 28.66   | 6.37  | o |
| 732 | 1 | 11  | 19  | 1 | 32.97   | 28.66   | 6.37  | o |
| 733 | 2 | -12 | -19 | 1 | 383.61  | 700.68  | 54.14 | o |
| 733 | 1 | 12  | 19  | 1 | 383.61  | 700.68  | 54.14 | o |
| 734 | 2 | 11  | -20 | 1 | 47.71   | 57.33   | 15.92 | o |
| 734 | 1 | -11 | 20  | 1 | 47.71   | 57.33   | 15.92 | o |
| 735 | 2 | 10  | -20 | 1 | 24.16   | 35.03   | 19.11 | < |
| 735 | 1 | -10 | 20  | 1 | 24.16   | 35.03   | 19.11 | < |
| 736 | 2 | 9   | -20 | 1 | 2.34    | 3.18    | 3.18  | < |
| 736 | 1 | -9  | 20  | 1 | 2.34    | 3.18    | 3.18  | < |
| 737 | 2 | 8   | -20 | 1 | 367.85  | 404.49  | 19.11 | o |
| 737 | 1 | -8  | 20  | 1 | 367.85  | 404.49  | 19.11 | o |
| 738 | 2 | 7   | -20 | 1 | 100.11  | 105.10  | 9.55  | o |
| 738 | 1 | -7  | 20  | 1 | 100.11  | 105.10  | 9.55  | o |
| 739 | 2 | 6   | -20 | 1 | 498.55  | 544.62  | 22.29 | o |
| 739 | 1 | -6  | 20  | 1 | 498.55  | 544.62  | 22.29 | o |
| 740 | 2 | 5   | -20 | 1 | 18.13   | 25.48   | 6.37  | o |
| 740 | 1 | -5  | 20  | 1 | 18.13   | 25.48   | 6.37  | o |
| 741 | 2 | 4   | -20 | 1 | 102.93  | 133.77  | 6.37  | o |
| 741 | 1 | -4  | 20  | 1 | 102.93  | 133.77  | 6.37  | o |
| 742 | 2 | 3   | -20 | 1 | 16.88   | 15.92   | 3.18  | o |
| 742 | 1 | -3  | 20  | 1 | 16.88   | 15.92   | 3.18  | o |
| 743 | 2 | 2   | -20 | 1 | 623.58  | 678.39  | 28.66 | o |
| 743 | 1 | -2  | 20  | 1 | 623.58  | 678.39  | 28.66 | o |
| 744 | 2 | 1   | -20 | 1 | 4.81    | 12.74   | 19.11 | < |
| 744 | 1 | -1  | 20  | 1 | 4.81    | 12.74   | 19.11 | < |
| 745 | 2 | 0   | -20 | 1 | 2235.91 | 2375.96 | 76.44 | o |
| 745 | 1 | 0   | 20  | 1 | 2235.91 | 2375.96 | 76.44 | o |
| 746 | 2 | -1  | -20 | 1 | 3.14    | 15.92   | 3.18  | o |
| 746 | 1 | 1   | 20  | 1 | 3.14    | 15.92   | 3.18  | o |
| 747 | 2 | -2  | -20 | 1 | 611.74  | 681.57  | 28.66 | o |
| 747 | 1 | 2   | 20  | 1 | 611.74  | 681.57  | 28.66 | o |
| 748 | 2 | -3  | -20 | 1 | 4.32    | 9.55    | 3.18  | o |
| 748 | 1 | 3   | 20  | 1 | 4.32    | 9.55    | 3.18  | o |
| 749 | 2 | -5  | -20 | 1 | 13.17   | 28.66   | 3.18  | o |
| 749 | 1 | 5   | 20  | 1 | 13.17   | 28.66   | 3.18  | o |
| 750 | 2 | -6  | -20 | 1 | 740.19  | 713.42  | 28.66 | o |
| 750 | 1 | 6   | 20  | 1 | 740.19  | 713.42  | 28.66 | o |
| 751 | 2 | -7  | -20 | 1 | 164.49  | 159.25  | 9.55  | o |
| 751 | 1 | 7   | 20  | 1 | 164.49  | 159.25  | 9.55  | o |
| 752 | 2 | -8  | -20 | 1 | 98.21   | 114.66  | 9.55  | o |
| 752 | 1 | 8   | 20  | 1 | 98.21   | 114.66  | 9.55  | o |
| 753 | 2 | -9  | -20 | 1 | 6.58    | 9.55    | 3.18  | o |
| 753 | 1 | 9   | 20  | 1 | 6.58    | 9.55    | 3.18  | o |
| 754 | 2 | -10 | -20 | 1 | 46.48   | 66.88   | 9.55  | o |
| 754 | 1 | 10  | 20  | 1 | 46.48   | 66.88   | 9.55  | o |
| 755 | 2 | -11 | -20 | 1 | 66.02   | 85.99   | 12.74 | o |
| 755 | 1 | 11  | 20  | 1 | 66.02   | 85.99   | 12.74 | o |
| 756 | 2 | 10  | -21 | 1 | 141.54  | 203.84  | 70.07 | < |
| 756 | 1 | -10 | 21  | 1 | 141.54  | 203.84  | 70.07 | < |
| 757 | 2 | 9   | -21 | 1 | 1109.54 | 1076.51 | 54.14 | o |
| 757 | 1 | -9  | 21  | 1 | 1109.54 | 1076.51 | 54.14 | o |

|     |   |     |     |   |          |          |        |   |
|-----|---|-----|-----|---|----------|----------|--------|---|
| 758 | 2 | 8   | -21 | 1 | 2243.74  | 2168.94  | 70.07  | o |
| 758 | 1 | -8  | 21  | 1 | 2243.74  | 2168.94  | 70.07  | o |
| 759 | 2 | 7   | -21 | 1 | 0.68     | 6.37     | 3.18   | < |
| 759 | 1 | -7  | 21  | 1 | 0.68     | 6.37     | 3.18   | < |
| 760 | 2 | 5   | -21 | 1 | 1276.73  | 1197.53  | 44.59  | o |
| 760 | 1 | -5  | 21  | 1 | 1276.73  | 1197.53  | 44.59  | o |
| 761 | 2 | 4   | -21 | 1 | 13977.30 | 14230.30 | 500.03 | o |
| 761 | 1 | -4  | 21  | 1 | 13977.30 | 14230.30 | 500.03 | o |
| 762 | 2 | 3   | -21 | 1 | 116.11   | 66.88    | 6.37   | o |
| 762 | 1 | -3  | 21  | 1 | 116.11   | 66.88    | 6.37   | o |
| 763 | 2 | 2   | -21 | 1 | 2687.16  | 2496.98  | 79.62  | o |
| 763 | 1 | -2  | 21  | 1 | 2687.16  | 2496.98  | 79.62  | o |
| 764 | 2 | 1   | -21 | 1 | 27.14    | 50.96    | 6.37   | o |
| 764 | 1 | -1  | 21  | 1 | 27.14    | 50.96    | 6.37   | o |
| 765 | 2 | 0   | -21 | 1 | 97.44    | 143.32   | 9.55   | o |
| 765 | 1 | 0   | 21  | 1 | 97.44    | 143.32   | 9.55   | o |
| 766 | 2 | -1  | -21 | 1 | 42.96    | 47.77    | 3.18   | o |
| 766 | 1 | 1   | 21  | 1 | 42.96    | 47.77    | 3.18   | o |
| 767 | 2 | -3  | -21 | 1 | 29.53    | 63.70    | 6.37   | o |
| 767 | 1 | 3   | 21  | 1 | 29.53    | 63.70    | 6.37   | o |
| 768 | 2 | -4  | -21 | 1 | 11108.20 | 13341.70 | 407.67 | o |
| 768 | 1 | 4   | 21  | 1 | 11108.20 | 13341.70 | 407.67 | o |
| 769 | 2 | -5  | -21 | 1 | 1402.23  | 1305.82  | 50.96  | o |
| 769 | 1 | 5   | 21  | 1 | 1402.23  | 1305.82  | 50.96  | o |
| 770 | 2 | -6  | -21 | 1 | 261.56   | 267.53   | 12.74  | o |
| 770 | 1 | 6   | 21  | 1 | 261.56   | 267.53   | 12.74  | o |
| 771 | 2 | -7  | -21 | 1 | 1.41     | 3.18     | 3.18   | < |
| 771 | 1 | 7   | 21  | 1 | 1.41     | 3.18     | 3.18   | < |
| 772 | 2 | -8  | -21 | 1 | 2122.29  | 2203.97  | 95.55  | o |
| 772 | 1 | 8   | 21  | 1 | 2122.29  | 2203.97  | 95.55  | o |
| 773 | 2 | -9  | -21 | 1 | 1023.48  | 965.03   | 35.03  | o |
| 773 | 1 | 9   | 21  | 1 | 1023.48  | 965.03   | 35.03  | o |
| 774 | 2 | -10 | -21 | 1 | 87.72    | 197.46   | 22.29  | o |
| 774 | 1 | 10  | 21  | 1 | 87.72    | 197.46   | 22.29  | o |
| 775 | 2 | 9   | -22 | 1 | 71.13    | 63.70    | 9.55   | o |
| 775 | 1 | -9  | 22  | 1 | 71.13    | 63.70    | 9.55   | o |
| 776 | 2 | 8   | -22 | 1 | 248.04   | 257.98   | 12.74  | o |
| 776 | 1 | -8  | 22  | 1 | 248.04   | 257.98   | 12.74  | o |
| 777 | 2 | 7   | -22 | 1 | 13.73    | 28.66    | 3.18   | o |
| 777 | 1 | -7  | 22  | 1 | 13.73    | 28.66    | 3.18   | o |
| 778 | 2 | 6   | -22 | 1 | 300.12   | 391.75   | 15.92  | o |
| 778 | 1 | -6  | 22  | 1 | 300.12   | 391.75   | 15.92  | o |
| 779 | 2 | 5   | -22 | 1 | 7.21     | 9.55     | 3.18   | o |
| 779 | 1 | -5  | 22  | 1 | 7.21     | 9.55     | 3.18   | o |
| 780 | 2 | 4   | -22 | 1 | 3949.52  | 3955.68  | 143.32 | o |
| 780 | 1 | -4  | 22  | 1 | 3949.52  | 3955.68  | 143.32 | o |
| 781 | 2 | 3   | -22 | 1 | 569.94   | 624.25   | 22.29  | o |
| 781 | 1 | -3  | 22  | 1 | 569.94   | 624.25   | 22.29  | o |
| 782 | 2 | 2   | -22 | 1 | 763.78   | 1070.14  | 38.22  | o |
| 782 | 1 | -2  | 22  | 1 | 763.78   | 1070.14  | 38.22  | o |
| 783 | 2 | 1   | -22 | 1 | 149.93   | 130.58   | 6.37   | o |
| 783 | 1 | -1  | 22  | 1 | 149.93   | 130.58   | 6.37   | o |
| 784 | 2 | 0   | -22 | 1 | 1.45     | 3.18     | 6.37   | < |
| 784 | 1 | 0   | 22  | 1 | 1.45     | 3.18     | 6.37   | < |
| 785 | 2 | -1  | -22 | 1 | 138.21   | 143.32   | 9.55   | o |
| 785 | 1 | 1   | 22  | 1 | 138.21   | 143.32   | 9.55   | o |
| 786 | 2 | -2  | -22 | 1 | 1366.66  | 1289.90  | 41.40  | o |
| 786 | 1 | 2   | 22  | 1 | 1366.66  | 1289.90  | 41.40  | o |

|     |   |    |     |   |         |         |        |   |
|-----|---|----|-----|---|---------|---------|--------|---|
| 787 | 2 | -3 | -22 | 1 | 553.03  | 541.44  | 25.48  | o |
| 787 | 1 | 3  | 22  | 1 | 553.03  | 541.44  | 25.48  | o |
| 788 | 2 | -4 | -22 | 1 | 2821.01 | 3468.39 | 127.40 | o |
| 788 | 1 | 4  | 22  | 1 | 2821.01 | 3468.39 | 127.40 | o |
| 789 | 2 | -5 | -22 | 1 | 4.21    | 6.37    | 3.18   | < |
| 789 | 1 | 5  | 22  | 1 | 4.21    | 6.37    | 3.18   | < |
| 790 | 2 | -6 | -22 | 1 | 738.51  | 652.91  | 22.29  | o |
| 790 | 1 | 6  | 22  | 1 | 738.51  | 652.91  | 22.29  | o |
| 791 | 2 | -7 | -22 | 1 | 45.28   | 47.77   | 6.37   | o |
| 791 | 1 | 7  | 22  | 1 | 45.28   | 47.77   | 6.37   | o |
| 792 | 2 | -8 | -22 | 1 | 139.32  | 146.51  | 9.55   | o |
| 792 | 1 | 8  | 22  | 1 | 139.32  | 146.51  | 9.55   | o |
| 793 | 2 | -9 | -22 | 1 | 25.98   | 63.70   | 12.74  | o |
| 793 | 1 | 9  | 22  | 1 | 25.98   | 63.70   | 12.74  | o |
| 794 | 2 | 8  | -23 | 1 | 1113.15 | 1044.66 | 50.96  | o |
| 794 | 1 | -8 | 23  | 1 | 1113.15 | 1044.66 | 50.96  | o |
| 795 | 2 | 7  | -23 | 1 | 691.82  | 662.47  | 25.48  | o |
| 795 | 1 | -7 | 23  | 1 | 691.82  | 662.47  | 25.48  | o |
| 796 | 2 | 5  | -23 | 1 | 137.16  | 133.77  | 9.55   | o |
| 796 | 1 | -5 | 23  | 1 | 137.16  | 133.77  | 9.55   | o |
| 797 | 2 | 4  | -23 | 1 | 7487.93 | 8401.84 | 257.98 | o |
| 797 | 1 | -4 | 23  | 1 | 7487.93 | 8401.84 | 257.98 | o |
| 798 | 2 | 3  | -23 | 1 | 174.74  | 229.32  | 15.92  | o |
| 798 | 1 | -3 | 23  | 1 | 174.74  | 229.32  | 15.92  | o |
| 799 | 2 | 2  | -23 | 1 | 263.94  | 283.46  | 15.92  | o |
| 799 | 1 | -2 | 23  | 1 | 263.94  | 283.46  | 15.92  | o |
| 800 | 2 | 1  | -23 | 1 | 923.38  | 891.78  | 31.85  | o |
| 800 | 1 | -1 | 23  | 1 | 923.38  | 891.78  | 31.85  | o |
| 801 | 2 | -1 | -23 | 1 | 752.37  | 802.60  | 28.66  | o |
| 801 | 1 | 1  | 23  | 1 | 752.37  | 802.60  | 28.66  | o |
| 802 | 2 | -3 | -23 | 1 | 368.74  | 293.01  | 12.74  | o |
| 802 | 1 | 3  | 23  | 1 | 368.74  | 293.01  | 12.74  | o |
| 803 | 2 | -4 | -23 | 1 | 8753.07 | 9147.11 | 321.68 | o |
| 803 | 1 | 4  | 23  | 1 | 8753.07 | 9147.11 | 321.68 | o |
| 804 | 2 | -5 | -23 | 1 | 93.91   | 121.03  | 9.55   | o |
| 804 | 1 | 5  | 23  | 1 | 93.91   | 121.03  | 9.55   | o |
| 805 | 2 | -7 | -23 | 1 | 818.02  | 716.61  | 38.22  | o |
| 805 | 1 | 7  | 23  | 1 | 818.02  | 716.61  | 38.22  | o |
| 806 | 2 | -8 | -23 | 1 | 824.27  | 748.46  | 35.03  | o |
| 806 | 1 | 8  | 23  | 1 | 824.27  | 748.46  | 35.03  | o |
| 807 | 2 | 7  | -24 | 1 | 98.35   | 127.40  | 9.55   | o |
| 807 | 1 | -7 | 24  | 1 | 98.35   | 127.40  | 9.55   | o |
| 808 | 2 | 6  | -24 | 1 | 316.36  | 312.12  | 15.92  | o |
| 808 | 1 | -6 | 24  | 1 | 316.36  | 312.12  | 15.92  | o |
| 809 | 2 | 5  | -24 | 1 | 5.14    | 6.37    | 3.18   | < |
| 809 | 1 | -5 | 24  | 1 | 5.14    | 6.37    | 3.18   | < |
| 810 | 2 | 4  | -24 | 1 | 109.51  | 89.18   | 6.37   | o |
| 810 | 1 | -4 | 24  | 1 | 109.51  | 89.18   | 6.37   | o |
| 811 | 2 | 3  | -24 | 1 | 150.60  | 181.54  | 12.74  | o |
| 811 | 1 | -3 | 24  | 1 | 150.60  | 181.54  | 12.74  | o |
| 812 | 2 | 2  | -24 | 1 | 1177.10 | 1213.46 | 41.40  | o |
| 812 | 1 | -2 | 24  | 1 | 1177.10 | 1213.46 | 41.40  | o |
| 813 | 2 | 1  | -24 | 1 | 11.57   | 6.37    | 3.18   | < |
| 813 | 1 | -1 | 24  | 1 | 11.57   | 6.37    | 3.18   | < |
| 814 | 2 | 0  | -24 | 1 | 1358.91 | 1535.13 | 50.96  | o |
| 814 | 1 | 0  | 24  | 1 | 1358.91 | 1535.13 | 50.96  | o |
| 815 | 2 | -1 | -24 | 1 | 9.87    | 9.55    | 3.18   | o |
| 815 | 1 | 1  | 24  | 1 | 9.87    | 9.55    | 3.18   | o |



|     |   |    |     |   |         |         |       |   |
|-----|---|----|-----|---|---------|---------|-------|---|
| 816 | 2 | -2 | -24 | 1 | 1128.60 | 1121.09 | 41.40 | o |
| 816 | 1 | 2  | 24  | 1 | 1128.60 | 1121.09 | 41.40 | o |
| 817 | 2 | -3 | -24 | 1 | 253.98  | 219.76  | 9.55  | o |
| 817 | 1 | 3  | 24  | 1 | 253.98  | 219.76  | 9.55  | o |
| 818 | 2 | -4 | -24 | 1 | 28.45   | 63.70   | 6.37  | o |
| 818 | 1 | 4  | 24  | 1 | 28.45   | 63.70   | 6.37  | o |
| 819 | 2 | -5 | -24 | 1 | 5.96    | 9.55    | 3.18  | o |
| 819 | 1 | 5  | 24  | 1 | 5.96    | 9.55    | 3.18  | o |
| 820 | 2 | -6 | -24 | 1 | 311.66  | 299.38  | 12.74 | o |
| 820 | 1 | 6  | 24  | 1 | 311.66  | 299.38  | 12.74 | o |
| 821 | 2 | -7 | -24 | 1 | 73.24   | 76.44   | 6.37  | o |
| 821 | 1 | 7  | 24  | 1 | 73.24   | 76.44   | 6.37  | o |
| 822 | 2 | 7  | -25 | 1 | 1466.90 | 1344.04 | 66.88 | o |
| 822 | 1 | -7 | 25  | 1 | 1466.90 | 1344.04 | 66.88 | o |
| 823 | 2 | 6  | -25 | 1 | 111.04  | 165.62  | 12.74 | o |
| 823 | 1 | -6 | 25  | 1 | 111.04  | 165.62  | 12.74 | o |
| 824 | 2 | 5  | -25 | 1 | 504.34  | 385.38  | 19.11 | o |
| 824 | 1 | -5 | 25  | 1 | 504.34  | 385.38  | 19.11 | o |
| 825 | 2 | 4  | -25 | 1 | 967.85  | 949.11  | 35.03 | o |
| 825 | 1 | -4 | 25  | 1 | 967.85  | 949.11  | 35.03 | o |
| 826 | 2 | 3  | -25 | 1 | 344.18  | 350.34  | 15.92 | o |
| 826 | 1 | -3 | 25  | 1 | 344.18  | 350.34  | 15.92 | o |
| 827 | 2 | 2  | -25 | 1 | 1434.30 | 1879.11 | 60.51 | o |
| 827 | 1 | -2 | 25  | 1 | 1434.30 | 1879.11 | 60.51 | o |
| 828 | 2 | 0  | -25 | 1 | 94.87   | 130.58  | 9.55  | o |
| 828 | 1 | 0  | 25  | 1 | 94.87   | 130.58  | 9.55  | o |
| 829 | 2 | -1 | -25 | 1 | 5.12    | 19.11   | 3.18  | o |
| 829 | 1 | 1  | 25  | 1 | 5.12    | 19.11   | 3.18  | o |
| 830 | 2 | -2 | -25 | 1 | 2480.42 | 2277.22 | 82.81 | o |
| 830 | 1 | 2  | 25  | 1 | 2480.42 | 2277.22 | 82.81 | o |
| 831 | 2 | -3 | -25 | 1 | 471.85  | 420.41  | 15.92 | o |
| 831 | 1 | 3  | 25  | 1 | 471.85  | 420.41  | 15.92 | o |
| 832 | 2 | -4 | -25 | 1 | 1037.81 | 1051.03 | 35.03 | o |
| 832 | 1 | 4  | 25  | 1 | 1037.81 | 1051.03 | 35.03 | o |
| 833 | 2 | -5 | -25 | 1 | 296.88  | 280.27  | 15.92 | o |
| 833 | 1 | 5  | 25  | 1 | 296.88  | 280.27  | 15.92 | o |
| 834 | 2 | -6 | -25 | 1 | 33.80   | 101.92  | 15.92 | o |
| 834 | 1 | 6  | 25  | 1 | 33.80   | 101.92  | 15.92 | o |
| 835 | 2 | -7 | -25 | 1 | 1614.83 | 1286.71 | 73.25 | o |
| 835 | 1 | 7  | 25  | 1 | 1614.83 | 1286.71 | 73.25 | o |
| 836 | 2 | 6  | -26 | 1 | 164.05  | 254.79  | 22.29 | o |
| 836 | 1 | -6 | 26  | 1 | 164.05  | 254.79  | 22.29 | o |
| 837 | 2 | 5  | -26 | 1 | 38.16   | 28.66   | 6.37  | o |
| 837 | 1 | -5 | 26  | 1 | 38.16   | 28.66   | 6.37  | o |
| 838 | 2 | 4  | -26 | 1 | 1008.02 | 1060.58 | 44.59 | o |
| 838 | 1 | -4 | 26  | 1 | 1008.02 | 1060.58 | 44.59 | o |
| 839 | 2 | 3  | -26 | 1 | 202.06  | 168.80  | 9.55  | o |
| 839 | 1 | -3 | 26  | 1 | 202.06  | 168.80  | 9.55  | o |
| 840 | 2 | 2  | -26 | 1 | 1419.08 | 1563.80 | 50.96 | o |
| 840 | 1 | -2 | 26  | 1 | 1419.08 | 1563.80 | 50.96 | o |
| 841 | 2 | 1  | -26 | 1 | 146.36  | 156.06  | 9.55  | o |
| 841 | 1 | -1 | 26  | 1 | 146.36  | 156.06  | 9.55  | o |
| 842 | 2 | 0  | -26 | 1 | 746.80  | 748.46  | 28.66 | o |
| 842 | 1 | 0  | 26  | 1 | 746.80  | 748.46  | 28.66 | o |
| 843 | 2 | -1 | -26 | 1 | 116.88  | 130.58  | 9.55  | o |
| 843 | 1 | 1  | 26  | 1 | 116.88  | 130.58  | 9.55  | o |
| 844 | 2 | -2 | -26 | 1 | 1346.13 | 1535.13 | 50.96 | o |
| 844 | 1 | 2  | 26  | 1 | 1346.13 | 1535.13 | 50.96 | o |

|     |   |    |     |   |          |          |        |   |
|-----|---|----|-----|---|----------|----------|--------|---|
| 845 | 2 | -3 | -26 | 1 | 114.50   | 146.51   | 9.55   | o |
| 845 | 1 | 3  | 26  | 1 | 114.50   | 146.51   | 9.55   | o |
| 846 | 2 | -4 | -26 | 1 | 1193.88  | 1172.05  | 47.77  | o |
| 846 | 1 | 4  | 26  | 1 | 1193.88  | 1172.05  | 47.77  | o |
| 847 | 2 | -5 | -26 | 1 | 10.00    | 12.74    | 6.37   | < |
| 847 | 1 | 5  | 26  | 1 | 10.00    | 12.74    | 6.37   | < |
| 848 | 2 | -6 | -26 | 1 | 541.10   | 465.00   | 25.48  | o |
| 848 | 1 | 6  | 26  | 1 | 541.10   | 465.00   | 25.48  | o |
| 849 | 2 | -7 | -26 | 1 | 8.95     | 6.37     | 6.37   | < |
| 849 | 1 | 7  | 26  | 1 | 8.95     | 6.37     | 6.37   | < |
| 850 | 2 | 6  | -27 | 1 | 546.20   | 636.98   | 35.03  | o |
| 850 | 1 | -6 | 27  | 1 | 546.20   | 636.98   | 35.03  | o |
| 851 | 2 | 5  | -27 | 1 | 1108.04  | 1175.24  | 57.33  | o |
| 851 | 1 | -5 | 27  | 1 | 1108.04  | 1175.24  | 57.33  | o |
| 852 | 2 | 4  | -27 | 1 | 261.69   | 398.12   | 25.48  | o |
| 852 | 1 | -4 | 27  | 1 | 261.69   | 398.12   | 25.48  | o |
| 853 | 2 | 3  | -27 | 1 | 189.65   | 187.91   | 15.92  | o |
| 853 | 1 | -3 | 27  | 1 | 189.65   | 187.91   | 15.92  | o |
| 854 | 2 | 2  | -27 | 1 | 14519.50 | 15714.40 | 550.99 | o |
| 854 | 1 | -2 | 27  | 1 | 14519.50 | 15714.40 | 550.99 | o |
| 855 | 2 | 1  | -27 | 1 | 177.02   | 203.84   | 12.74  | o |
| 855 | 1 | -1 | 27  | 1 | 177.02   | 203.84   | 12.74  | o |
| 856 | 2 | -1 | -27 | 1 | 340.36   | 305.75   | 15.92  | o |
| 856 | 1 | 1  | 27  | 1 | 340.36   | 305.75   | 15.92  | o |
| 857 | 2 | -2 | -27 | 1 | 12300.50 | 13905.40 | 487.29 | o |
| 857 | 1 | 2  | 27  | 1 | 12300.50 | 13905.40 | 487.29 | o |
| 858 | 2 | -3 | -27 | 1 | 150.91   | 165.62   | 12.74  | o |
| 858 | 1 | 3  | 27  | 1 | 150.91   | 165.62   | 12.74  | o |
| 859 | 2 | -4 | -27 | 1 | 668.54   | 570.10   | 31.85  | o |
| 859 | 1 | 4  | 27  | 1 | 668.54   | 570.10   | 31.85  | o |
| 860 | 2 | -5 | -27 | 1 | 1365.75  | 1280.34  | 63.70  | o |
| 860 | 1 | 5  | 27  | 1 | 1365.75  | 1280.34  | 63.70  | o |
| 861 | 2 | -6 | -27 | 1 | 779.81   | 799.42   | 41.40  | o |
| 861 | 1 | 6  | 27  | 1 | 779.81   | 799.42   | 41.40  | o |
| 862 | 2 | 5  | -28 | 1 | 54.32    | 63.70    | 9.55   | o |
| 862 | 1 | -5 | 28  | 1 | 54.32    | 63.70    | 9.55   | o |
| 863 | 2 | 4  | -28 | 1 | 1043.30  | 1044.66  | 54.14  | o |
| 863 | 1 | -4 | 28  | 1 | 1043.30  | 1044.66  | 54.14  | o |
| 864 | 2 | 3  | -28 | 1 | 5.14     | 19.11    | 6.37   | o |
| 864 | 1 | -3 | 28  | 1 | 5.14     | 19.11    | 6.37   | o |
| 865 | 2 | 2  | -28 | 1 | 57.65    | 66.88    | 12.74  | o |
| 865 | 1 | -2 | 28  | 1 | 57.65    | 66.88    | 12.74  | o |
| 866 | 2 | 1  | -28 | 1 | 435.08   | 407.67   | 35.03  | o |
| 866 | 1 | -1 | 28  | 1 | 435.08   | 407.67   | 35.03  | o |
| 867 | 2 | -1 | -28 | 1 | 498.41   | 423.60   | 38.22  | o |
| 867 | 1 | 1  | 28  | 1 | 498.41   | 423.60   | 38.22  | o |
| 868 | 2 | -2 | -28 | 1 | 21.41    | 38.22    | 12.74  | o |
| 868 | 1 | 2  | 28  | 1 | 21.41    | 38.22    | 12.74  | o |
| 869 | 2 | -3 | -28 | 1 | 4.79     | 9.55     | 6.37   | < |
| 869 | 1 | 3  | 28  | 1 | 4.79     | 9.55     | 6.37   | < |
| 870 | 2 | -4 | -28 | 1 | 1380.22  | 1337.67  | 92.36  | o |
| 870 | 1 | 4  | 28  | 1 | 1380.22  | 1337.67  | 92.36  | o |
| 871 | 2 | -5 | -28 | 1 | 29.71    | 38.22    | 6.37   | o |
| 871 | 1 | 5  | 28  | 1 | 29.71    | 38.22    | 6.37   | o |
| 872 | 2 | 7  | 0   | 2 | 534.51   | 465.00   | 19.11  | o |
| 872 | 1 | -7 | 0   | 2 | 534.51   | 465.00   | 19.11  | o |
| 873 | 2 | 6  | 0   | 2 | 12232.20 | 10545.30 | 449.08 | o |
| 873 | 1 | -6 | 0   | 2 | 12232.20 | 10545.30 | 449.08 | o |

|     |   |     |    |   |           |           |         |   |
|-----|---|-----|----|---|-----------|-----------|---------|---|
| 874 | 2 | 5   | 0  | 2 | 874.70    | 1121.09   | 70.07   | o |
| 874 | 1 | -5  | 0  | 2 | 874.70    | 1121.09   | 70.07   | o |
| 875 | 2 | 4   | 0  | 2 | 3310.51   | 2493.80   | 108.29  | o |
| 875 | 1 | -4  | 0  | 2 | 3310.51   | 2493.80   | 108.29  | o |
| 876 | 2 | 3   | 0  | 2 | 56925.50  | 50818.70  | 2162.57 | o |
| 876 | 1 | -3  | 0  | 2 | 56925.50  | 50818.70  | 2162.57 | o |
| 877 | 2 | 2   | 0  | 2 | 26818.50  | 21173.40  | 907.70  | o |
| 877 | 1 | -2  | 0  | 2 | 26818.50  | 21173.40  | 907.70  | o |
| 878 | 2 | 0   | 0  | 2 | 219594.00 | 143940.00 | 8669.37 | o |
| 878 | 1 | 0   | 0  | 2 | 219594.00 | 143940.00 | 8669.37 | o |
| 879 | 2 | -2  | 0  | 2 | 23541.70  | 19702.00  | 844.01  | o |
| 879 | 1 | 2   | 0  | 2 | 23541.70  | 19702.00  | 844.01  | o |
| 880 | 2 | -3  | 0  | 2 | 55495.70  | 50634.00  | 2156.20 | o |
| 880 | 1 | 3   | 0  | 2 | 55495.70  | 50634.00  | 2156.20 | o |
| 881 | 2 | -4  | 0  | 2 | 1545.40   | 1433.22   | 89.18   | o |
| 881 | 1 | 4   | 0  | 2 | 1545.40   | 1433.22   | 89.18   | o |
| 882 | 2 | -5  | 0  | 2 | 2088.05   | 1745.34   | 76.44   | o |
| 882 | 1 | 5   | 0  | 2 | 2088.05   | 1745.34   | 76.44   | o |
| 883 | 2 | -6  | 0  | 2 | 10540.80  | 9264.95   | 394.93  | o |
| 883 | 1 | 6   | 0  | 2 | 10540.80  | 9264.95   | 394.93  | o |
| 884 | 2 | -8  | 0  | 2 | 707.62    | 522.33    | 35.03   | o |
| 884 | 1 | 8   | 0  | 2 | 707.62    | 522.33    | 35.03   | o |
| 885 | 2 | -9  | 0  | 2 | 6047.84   | 5538.59   | 331.23  | o |
| 885 | 1 | 9   | 0  | 2 | 6047.84   | 5538.59   | 331.23  | o |
| 886 | 2 | -10 | 0  | 2 | 2934.07   | 2289.96   | 140.14  | o |
| 886 | 1 | 10  | 0  | 2 | 2934.07   | 2289.96   | 140.14  | o |
| 887 | 2 | 8   | -1 | 2 | 71.72     | 19.11     | 6.37    | o |
| 887 | 1 | -8  | 1  | 2 | 71.72     | 19.11     | 6.37    | o |
| 888 | 2 | 7   | -1 | 2 | 685.92    | 630.62    | 28.66   | o |
| 888 | 1 | -7  | 1  | 2 | 685.92    | 630.62    | 28.66   | o |
| 889 | 2 | 6   | -1 | 2 | 1351.99   | 1140.20   | 47.77   | o |
| 889 | 1 | -6  | 1  | 2 | 1351.99   | 1140.20   | 47.77   | o |
| 890 | 2 | 5   | -1 | 2 | 1444.65   | 1286.71   | 38.22   | o |
| 890 | 1 | -5  | 1  | 2 | 1444.65   | 1286.71   | 38.22   | o |
| 891 | 2 | 2   | -1 | 2 | 67.56     | 54.14     | 3.18    | o |
| 891 | 1 | -2  | 1  | 2 | 67.56     | 54.14     | 3.18    | o |
| 892 | 2 | 1   | -1 | 2 | 1143.90   | 1070.14   | 31.85   | o |
| 892 | 1 | -1  | 1  | 2 | 1143.90   | 1070.14   | 31.85   | o |
| 893 | 2 | -1  | -1 | 2 | 339.46    | 343.97    | 12.74   | o |
| 893 | 1 | 1   | 1  | 2 | 339.46    | 343.97    | 12.74   | o |
| 894 | 2 | -2  | -1 | 2 | 266.52    | 251.61    | 9.55    | o |
| 894 | 1 | 2   | 1  | 2 | 266.52    | 251.61    | 9.55    | o |
| 895 | 2 | -3  | -1 | 2 | 76.46     | 82.81     | 3.18    | o |
| 895 | 1 | 3   | 1  | 2 | 76.46     | 82.81     | 3.18    | o |
| 896 | 2 | -4  | -1 | 2 | 247.62    | 232.50    | 9.55    | o |
| 896 | 1 | 4   | 1  | 2 | 247.62    | 232.50    | 9.55    | o |
| 897 | 2 | -6  | -1 | 2 | 1465.83   | 1309.01   | 41.40   | o |
| 897 | 1 | 6   | 1  | 2 | 1465.83   | 1309.01   | 41.40   | o |
| 898 | 2 | -7  | -1 | 2 | 176.08    | 41.40     | 12.74   | o |
| 898 | 1 | 7   | 1  | 2 | 176.08    | 41.40     | 12.74   | o |
| 899 | 2 | -8  | -1 | 2 | 225.74    | 187.91    | 6.37    | o |
| 899 | 1 | 8   | 1  | 2 | 225.74    | 187.91    | 6.37    | o |
| 900 | 2 | -9  | -1 | 2 | 109.24    | 98.73     | 6.37    | o |
| 900 | 1 | 9   | 1  | 2 | 109.24    | 98.73     | 6.37    | o |
| 901 | 2 | -10 | -1 | 2 | 356.41    | 296.20    | 12.74   | o |
| 901 | 1 | 10  | 1  | 2 | 356.41    | 296.20    | 12.74   | o |
| 902 | 2 | -11 | -1 | 2 | 13.05     | 15.92     | 3.18    | o |
| 902 | 1 | 11  | 1  | 2 | 13.05     | 15.92     | 3.18    | o |

|     |   |     |    |   |          |          |         |   |
|-----|---|-----|----|---|----------|----------|---------|---|
| 903 | 2 | 9   | -2 | 2 | 5175.61  | 4847.46  | 219.76  | o |
| 903 | 1 | -9  | 2  | 2 | 5175.61  | 4847.46  | 219.76  | o |
| 904 | 2 | 8   | -2 | 2 | 16889.40 | 14778.10 | 630.62  | o |
| 904 | 1 | -8  | 2  | 2 | 16889.40 | 14778.10 | 630.62  | o |
| 905 | 2 | 6   | -2 | 2 | 15108.70 | 12379.80 | 525.51  | o |
| 905 | 1 | -6  | 2  | 2 | 15108.70 | 12379.80 | 525.51  | o |
| 906 | 2 | 5   | -2 | 2 | 8689.78  | 7369.92  | 315.31  | o |
| 906 | 1 | -5  | 2  | 2 | 8689.78  | 7369.92  | 315.31  | o |
| 907 | 2 | 3   | -2 | 2 | 12363.80 | 9752.25  | 296.20  | o |
| 907 | 1 | -3  | 2  | 2 | 12363.80 | 9752.25  | 296.20  | o |
| 908 | 2 | 2   | -2 | 2 | 58544.30 | 50745.40 | 1528.77 | o |
| 908 | 1 | -2  | 2  | 2 | 58544.30 | 50745.40 | 1528.77 | o |
| 909 | 2 | 1   | -2 | 2 | 3547.82  | 3009.76  | 92.36   | o |
| 909 | 1 | -1  | 2  | 2 | 3547.82  | 3009.76  | 92.36   | o |
| 910 | 2 | -1  | -2 | 2 | 3685.78  | 3178.56  | 95.55   | o |
| 910 | 1 | 1   | 2  | 2 | 3685.78  | 3178.56  | 95.55   | o |
| 911 | 2 | -2  | -2 | 2 | 57251.10 | 50318.70 | 1525.58 | o |
| 911 | 1 | 2   | 2  | 2 | 57251.10 | 50318.70 | 1525.58 | o |
| 912 | 2 | -3  | -2 | 2 | 10282.80 | 9405.09  | 286.64  | o |
| 912 | 1 | 3   | 2  | 2 | 10282.80 | 9405.09  | 286.64  | o |
| 913 | 2 | -5  | -2 | 2 | 7842.39  | 7624.72  | 229.32  | o |
| 913 | 1 | 5   | 2  | 2 | 7842.39  | 7624.72  | 229.32  | o |
| 914 | 2 | -6  | -2 | 2 | 15320.70 | 12911.70 | 388.56  | o |
| 914 | 1 | 6   | 2  | 2 | 15320.70 | 12911.70 | 388.56  | o |
| 915 | 2 | -7  | -2 | 2 | 2313.36  | 1844.07  | 79.62   | o |
| 915 | 1 | 7   | 2  | 2 | 2313.36  | 1844.07  | 79.62   | o |
| 916 | 2 | -8  | -2 | 2 | 18686.50 | 17475.70 | 525.51  | o |
| 916 | 1 | 8   | 2  | 2 | 18686.50 | 17475.70 | 525.51  | o |
| 917 | 2 | -9  | -2 | 2 | 4967.85  | 4821.98  | 146.51  | o |
| 917 | 1 | 9   | 2  | 2 | 4967.85  | 4821.98  | 146.51  | o |
| 918 | 2 | -10 | -2 | 2 | 4639.47  | 3720.00  | 226.13  | o |
| 918 | 1 | 10  | 2  | 2 | 4639.47  | 3720.00  | 226.13  | o |
| 919 | 2 | -11 | -2 | 2 | 15.58    | 22.29    | 3.18    | o |
| 919 | 1 | 11  | 2  | 2 | 15.58    | 22.29    | 3.18    | o |
| 920 | 2 | -12 | -2 | 2 | 1295.92  | 1242.12  | 76.44   | o |
| 920 | 1 | 12  | 2  | 2 | 1295.92  | 1242.12  | 76.44   | o |
| 921 | 2 | 10  | -3 | 2 | 7.67     | 9.55     | 3.18    | o |
| 921 | 1 | -10 | 3  | 2 | 7.67     | 9.55     | 3.18    | o |
| 922 | 2 | 9   | -3 | 2 | 696.41   | 621.06   | 35.03   | o |
| 922 | 1 | -9  | 3  | 2 | 696.41   | 621.06   | 35.03   | o |
| 923 | 2 | 8   | -3 | 2 | 1554.70  | 1226.20  | 54.14   | o |
| 923 | 1 | -8  | 3  | 2 | 1554.70  | 1226.20  | 54.14   | o |
| 924 | 2 | 7   | -3 | 2 | 54.24    | 38.22    | 3.18    | o |
| 924 | 1 | -7  | 3  | 2 | 54.24    | 38.22    | 3.18    | o |
| 925 | 2 | 6   | -3 | 2 | 2007.41  | 1551.06  | 70.07   | o |
| 925 | 1 | -6  | 3  | 2 | 2007.41  | 1551.06  | 70.07   | o |
| 926 | 2 | 4   | -3 | 2 | 3284.26  | 3003.39  | 98.73   | o |
| 926 | 1 | -4  | 3  | 2 | 3284.26  | 3003.39  | 98.73   | o |
| 927 | 2 | 3   | -3 | 2 | 2385.64  | 2401.44  | 73.25   | o |
| 927 | 1 | -3  | 3  | 2 | 2385.64  | 2401.44  | 73.25   | o |
| 928 | 2 | 0   | -3 | 2 | 2.17     | -9.55    | 3.18    | < |
| 928 | 1 | 0   | 3  | 2 | 2.17     | -9.55    | 3.18    | < |
| 929 | 2 | -1  | -3 | 2 | 372.21   | 445.89   | 15.92   | o |
| 929 | 1 | 1   | 3  | 2 | 372.21   | 445.89   | 15.92   | o |
| 930 | 2 | -2  | -3 | 2 | 682.00   | 681.57   | 22.29   | o |
| 930 | 1 | 2   | 3  | 2 | 682.00   | 681.57   | 22.29   | o |
| 931 | 2 | -3  | -3 | 2 | 2973.23  | 2681.71  | 82.81   | o |
| 931 | 1 | 3   | 3  | 2 | 2973.23  | 2681.71  | 82.81   | o |

|     |   |     |    |   |          |          |         |   |
|-----|---|-----|----|---|----------|----------|---------|---|
| 932 | 2 | -4  | -3 | 2 | 3761.23  | 3411.06  | 105.10  | o |
| 932 | 1 | 4   | 3  | 2 | 3761.23  | 3411.06  | 105.10  | o |
| 933 | 2 | -5  | -3 | 2 | 995.88   | 933.18   | 28.66   | o |
| 933 | 1 | 5   | 3  | 2 | 995.88   | 933.18   | 28.66   | o |
| 934 | 2 | -6  | -3 | 2 | 1352.20  | 1156.13  | 35.03   | o |
| 934 | 1 | 6   | 3  | 2 | 1352.20  | 1156.13  | 35.03   | o |
| 935 | 2 | -7  | -3 | 2 | 15.91    | 12.74    | 3.18    | o |
| 935 | 1 | 7   | 3  | 2 | 15.91    | 12.74    | 3.18    | o |
| 936 | 2 | -8  | -3 | 2 | 1197.41  | 1060.58  | 44.59   | o |
| 936 | 1 | 8   | 3  | 2 | 1197.41  | 1060.58  | 44.59   | o |
| 937 | 2 | -9  | -3 | 2 | 470.27   | 433.15   | 22.29   | o |
| 937 | 1 | 9   | 3  | 2 | 470.27   | 433.15   | 22.29   | o |
| 938 | 2 | -10 | -3 | 2 | 6.79     | 6.37     | 3.18    | < |
| 938 | 1 | 10  | 3  | 2 | 6.79     | 6.37     | 3.18    | < |
| 939 | 2 | -11 | -3 | 2 | 35.40    | 38.22    | 6.37    | o |
| 939 | 1 | 11  | 3  | 2 | 35.40    | 38.22    | 6.37    | o |
| 940 | 2 | -12 | -3 | 2 | 315.68   | 264.35   | 15.92   | o |
| 940 | 1 | 12  | 3  | 2 | 315.68   | 264.35   | 15.92   | o |
| 941 | 2 | 11  | -4 | 2 | 24.09    | 22.29    | 3.18    | o |
| 941 | 1 | -11 | 4  | 2 | 24.09    | 22.29    | 3.18    | o |
| 942 | 2 | 10  | -4 | 2 | 1941.95  | 2028.80  | 89.18   | o |
| 942 | 1 | -10 | 4  | 2 | 1941.95  | 2028.80  | 89.18   | o |
| 943 | 2 | 9   | -4 | 2 | 1887.77  | 1254.86  | 79.62   | o |
| 943 | 1 | -9  | 4  | 2 | 1887.77  | 1254.86  | 79.62   | o |
| 944 | 2 | 8   | -4 | 2 | 4823.56  | 3981.16  | 171.99  | o |
| 944 | 1 | -8  | 4  | 2 | 4823.56  | 3981.16  | 171.99  | o |
| 945 | 2 | 7   | -4 | 2 | 4580.32  | 4134.04  | 178.36  | o |
| 945 | 1 | -7  | 4  | 2 | 4580.32  | 4134.04  | 178.36  | o |
| 946 | 2 | 6   | -4 | 2 | 38771.10 | 34505.50 | 1465.07 | o |
| 946 | 1 | -6  | 4  | 2 | 38771.10 | 34505.50 | 1465.07 | o |
| 947 | 2 | 4   | -4 | 2 | 43861.20 | 41142.90 | 1238.94 | o |
| 947 | 1 | -4  | 4  | 2 | 43861.20 | 41142.90 | 1238.94 | o |
| 948 | 2 | 3   | -4 | 2 | 61818.80 | 62303.50 | 1879.11 | o |
| 948 | 1 | -3  | 4  | 2 | 61818.80 | 62303.50 | 1879.11 | o |
| 949 | 2 | 2   | -4 | 2 | 3354.56  | 3054.35  | 92.36   | o |
| 949 | 1 | -2  | 4  | 2 | 3354.56  | 3054.35  | 92.36   | o |
| 950 | 2 | 1   | -4 | 2 | 889.46   | 882.22   | 28.66   | o |
| 950 | 1 | -1  | 4  | 2 | 889.46   | 882.22   | 28.66   | o |
| 951 | 2 | 0   | -4 | 2 | 7115.61  | 6717.01  | 203.84  | o |
| 951 | 1 | 0   | 4  | 2 | 7115.61  | 6717.01  | 203.84  | o |
| 952 | 2 | -1  | -4 | 2 | 665.42   | 824.90   | 28.66   | o |
| 952 | 1 | 1   | 4  | 2 | 665.42   | 824.90   | 28.66   | o |
| 953 | 2 | -2  | -4 | 2 | 2625.00  | 2684.89  | 82.81   | o |
| 953 | 1 | 2   | 4  | 2 | 2625.00  | 2684.89  | 82.81   | o |
| 954 | 2 | -3  | -4 | 2 | 64882.60 | 64736.80 | 1965.10 | o |
| 954 | 1 | 3   | 4  | 2 | 64882.60 | 64736.80 | 1965.10 | o |
| 955 | 2 | -4  | -4 | 2 | 40530.80 | 39327.50 | 1194.35 | o |
| 955 | 1 | 4   | 4  | 2 | 40530.80 | 39327.50 | 1194.35 | o |
| 956 | 2 | -5  | -4 | 2 | 926.65   | 1047.84  | 31.85   | o |
| 956 | 1 | 5   | 4  | 2 | 926.65   | 1047.84  | 31.85   | o |
| 957 | 2 | -6  | -4 | 2 | 42583.40 | 36225.40 | 1089.24 | o |
| 957 | 1 | 6   | 4  | 2 | 42583.40 | 36225.40 | 1089.24 | o |
| 958 | 2 | -7  | -4 | 2 | 3931.78  | 3557.56  | 127.40  | o |
| 958 | 1 | 7   | 4  | 2 | 3931.78  | 3557.56  | 127.40  | o |
| 959 | 2 | -8  | -4 | 2 | 3458.56  | 3267.74  | 117.84  | o |
| 959 | 1 | 8   | 4  | 2 | 3458.56  | 3267.74  | 117.84  | o |
| 960 | 2 | -9  | -4 | 2 | 3265.53  | 3051.16  | 133.77  | o |
| 960 | 1 | 9   | 4  | 2 | 3265.53  | 3051.16  | 133.77  | o |

|     |   |     |    |   |          |          |        |   |
|-----|---|-----|----|---|----------|----------|--------|---|
| 961 | 2 | -10 | -4 | 2 | 1076.34  | 1445.96  | 92.36  | o |
| 961 | 1 | 10  | 4  | 2 | 1076.34  | 1445.96  | 92.36  | o |
| 962 | 2 | -11 | -4 | 2 | 20.11    | 15.92    | 3.18   | o |
| 962 | 1 | 11  | 4  | 2 | 20.11    | 15.92    | 3.18   | o |
| 963 | 2 | -12 | -4 | 2 | 158.05   | 63.70    | 9.55   | o |
| 963 | 1 | 12  | 4  | 2 | 158.05   | 63.70    | 9.55   | o |
| 964 | 2 | 12  | -5 | 2 | 244.39   | 251.61   | 19.11  | o |
| 964 | 1 | -12 | 5  | 2 | 244.39   | 251.61   | 19.11  | o |
| 965 | 2 | 11  | -5 | 2 | 37.77    | 3.18     | 12.74  | < |
| 965 | 1 | -11 | 5  | 2 | 37.77    | 3.18     | 12.74  | < |
| 966 | 2 | 10  | -5 | 2 | 47.74    | 50.96    | 6.37   | o |
| 966 | 1 | -10 | 5  | 2 | 47.74    | 50.96    | 6.37   | o |
| 967 | 2 | 9   | -5 | 2 | 225.38   | 213.39   | 12.74  | o |
| 967 | 1 | -9  | 5  | 2 | 225.38   | 213.39   | 12.74  | o |
| 968 | 2 | 8   | -5 | 2 | 1087.70  | 955.48   | 44.59  | o |
| 968 | 1 | -8  | 5  | 2 | 1087.70  | 955.48   | 44.59  | o |
| 969 | 2 | 7   | -5 | 2 | 418.03   | 426.78   | 22.29  | o |
| 969 | 1 | -7  | 5  | 2 | 418.03   | 426.78   | 22.29  | o |
| 970 | 2 | 6   | -5 | 2 | 117.71   | 117.84   | 6.37   | o |
| 970 | 1 | -6  | 5  | 2 | 117.71   | 117.84   | 6.37   | o |
| 971 | 2 | 5   | -5 | 2 | 329.53   | 283.46   | 9.55   | o |
| 971 | 1 | -5  | 5  | 2 | 329.53   | 283.46   | 9.55   | o |
| 972 | 2 | 4   | -5 | 2 | 2374.45  | 2226.26  | 95.55  | o |
| 972 | 1 | -4  | 5  | 2 | 2374.45  | 2226.26  | 95.55  | o |
| 973 | 2 | 3   | -5 | 2 | 3174.36  | 2637.12  | 79.62  | o |
| 973 | 1 | -3  | 5  | 2 | 3174.36  | 2637.12  | 79.62  | o |
| 974 | 2 | 1   | -5 | 2 | 486.28   | 576.47   | 19.11  | o |
| 974 | 1 | -1  | 5  | 2 | 486.28   | 576.47   | 19.11  | o |
| 975 | 2 | -2  | -5 | 2 | 946.68   | 805.79   | 25.48  | o |
| 975 | 1 | 2   | 5  | 2 | 946.68   | 805.79   | 25.48  | o |
| 976 | 2 | -4  | -5 | 2 | 4547.58  | 4274.17  | 130.58 | o |
| 976 | 1 | 4   | 5  | 2 | 4547.58  | 4274.17  | 130.58 | o |
| 977 | 2 | -5  | -5 | 2 | 142.49   | 101.92   | 6.37   | o |
| 977 | 1 | 5   | 5  | 2 | 142.49   | 101.92   | 6.37   | o |
| 978 | 2 | -6  | -5 | 2 | 161.61   | 168.80   | 6.37   | o |
| 978 | 1 | 6   | 5  | 2 | 161.61   | 168.80   | 6.37   | o |
| 979 | 2 | -7  | -5 | 2 | 374.63   | 302.57   | 12.74  | o |
| 979 | 1 | 7   | 5  | 2 | 374.63   | 302.57   | 12.74  | o |
| 980 | 2 | -8  | -5 | 2 | 802.48   | 754.83   | 38.22  | o |
| 980 | 1 | 8   | 5  | 2 | 802.48   | 754.83   | 38.22  | o |
| 981 | 2 | -9  | -5 | 2 | 93.62    | 70.07    | 57.33  | < |
| 981 | 1 | 9   | 5  | 2 | 93.62    | 70.07    | 57.33  | < |
| 982 | 2 | -10 | -5 | 2 | 18.92    | 6.37     | 3.18   | < |
| 982 | 1 | 10  | 5  | 2 | 18.92    | 6.37     | 3.18   | < |
| 983 | 2 | -11 | -5 | 2 | 147.58   | 184.73   | 15.92  | o |
| 983 | 1 | 11  | 5  | 2 | 147.58   | 184.73   | 15.92  | o |
| 984 | 2 | -12 | -5 | 2 | 125.07   | 95.55    | 25.48  | o |
| 984 | 1 | 12  | 5  | 2 | 125.07   | 95.55    | 25.48  | o |
| 985 | 2 | -13 | -5 | 2 | 1.33     | 0.00     | 3.18   | < |
| 985 | 1 | 13  | 5  | 2 | 1.33     | 0.00     | 3.18   | < |
| 986 | 2 | 13  | -6 | 2 | 8.82     | 3.18     | 3.18   | < |
| 986 | 1 | -13 | 6  | 2 | 8.82     | 3.18     | 3.18   | < |
| 987 | 2 | 12  | -6 | 2 | 555.88   | 659.28   | 31.85  | o |
| 987 | 1 | -12 | 6  | 2 | 555.88   | 659.28   | 31.85  | o |
| 988 | 2 | 11  | -6 | 2 | 138.19   | 133.77   | 12.74  | o |
| 988 | 1 | -11 | 6  | 2 | 138.19   | 133.77   | 12.74  | o |
| 989 | 2 | 10  | -6 | 2 | 14383.60 | 14106.00 | 601.95 | o |
| 989 | 1 | -10 | 6  | 2 | 14383.60 | 14106.00 | 601.95 | o |

|      |   |     |    |   |          |          |         |   |
|------|---|-----|----|---|----------|----------|---------|---|
| 990  | 2 | 9   | -6 | 2 | 554.05   | 668.84   | 44.59   | o |
| 990  | 1 | -9  | 6  | 2 | 554.05   | 668.84   | 44.59   | o |
| 991  | 2 | 8   | -6 | 2 | 8006.49  | 7522.80  | 321.68  | o |
| 991  | 1 | -8  | 6  | 2 | 8006.49  | 7522.80  | 321.68  | o |
| 992  | 2 | 6   | -6 | 2 | 1100.47  | 805.79   | 54.14   | o |
| 992  | 1 | -6  | 6  | 2 | 1100.47  | 805.79   | 54.14   | o |
| 993  | 2 | 5   | -6 | 2 | 3863.65  | 3669.04  | 111.47  | o |
| 993  | 1 | -5  | 6  | 2 | 3863.65  | 3669.04  | 111.47  | o |
| 994  | 2 | 4   | -6 | 2 | 99140.30 | 91194.00 | 2745.41 | o |
| 994  | 1 | -4  | 6  | 2 | 99140.30 | 91194.00 | 2745.41 | o |
| 995  | 2 | 2   | -6 | 2 | 16681.20 | 15239.90 | 461.81  | o |
| 995  | 1 | -2  | 6  | 2 | 16681.20 | 15239.90 | 461.81  | o |
| 996  | 2 | 1   | -6 | 2 | 204.23   | 210.21   | 9.55    | o |
| 996  | 1 | -1  | 6  | 2 | 204.23   | 210.21   | 9.55    | o |
| 997  | 2 | 0   | -6 | 2 | 50111.30 | 49289.90 | 1490.55 | o |
| 997  | 1 | 0   | 6  | 2 | 50111.30 | 49289.90 | 1490.55 | o |
| 998  | 2 | -1  | -6 | 2 | 195.24   | 219.76   | 9.55    | o |
| 998  | 1 | 1   | 6  | 2 | 195.24   | 219.76   | 9.55    | o |
| 999  | 2 | -2  | -6 | 2 | 19327.10 | 16214.50 | 490.48  | o |
| 999  | 1 | 2   | 6  | 2 | 19327.10 | 16214.50 | 490.48  | o |
| 1000 | 2 | -4  | -6 | 2 | 92825.60 | 92120.80 | 2793.18 | o |
| 1000 | 1 | 4   | 6  | 2 | 92825.60 | 92120.80 | 2793.18 | o |
| 1001 | 2 | -5  | -6 | 2 | 4207.77  | 3898.35  | 136.95  | o |
| 1001 | 1 | 5   | 6  | 2 | 4207.77  | 3898.35  | 136.95  | o |
| 1002 | 2 | -6  | -6 | 2 | 1735.31  | 1522.40  | 47.77   | o |
| 1002 | 1 | 6   | 6  | 2 | 1735.31  | 1522.40  | 47.77   | o |
| 1003 | 2 | -7  | -6 | 2 | 2097.47  | 1853.63  | 57.33   | o |
| 1003 | 1 | 7   | 6  | 2 | 2097.47  | 1853.63  | 57.33   | o |
| 1004 | 2 | -8  | -6 | 2 | 7527.59  | 6971.81  | 245.24  | o |
| 1004 | 1 | 8   | 6  | 2 | 7527.59  | 6971.81  | 245.24  | o |
| 1005 | 2 | -9  | -6 | 2 | 366.81   | 401.30   | 98.73   | o |
| 1005 | 1 | 9   | 6  | 2 | 366.81   | 401.30   | 98.73   | o |
| 1006 | 2 | -10 | -6 | 2 | 15835.40 | 17794.20 | 761.20  | o |
| 1006 | 1 | 10  | 6  | 2 | 15835.40 | 17794.20 | 761.20  | o |
| 1007 | 2 | -11 | -6 | 2 | 87.07    | 85.99    | 6.37    | o |
| 1007 | 1 | 11  | 6  | 2 | 87.07    | 85.99    | 6.37    | o |
| 1008 | 2 | -12 | -6 | 2 | 277.47   | 254.79   | 15.92   | o |
| 1008 | 1 | 12  | 6  | 2 | 277.47   | 254.79   | 15.92   | o |
| 1009 | 2 | -13 | -6 | 2 | 33.09    | 47.77    | 6.37    | o |
| 1009 | 1 | 13  | 6  | 2 | 33.09    | 47.77    | 6.37    | o |
| 1010 | 2 | 13  | -7 | 2 | 13.54    | 6.37     | 3.18    | < |
| 1010 | 1 | -13 | 7  | 2 | 13.54    | 6.37     | 3.18    | < |
| 1011 | 2 | 12  | -7 | 2 | 207.11   | 210.21   | 12.74   | o |
| 1011 | 1 | -12 | 7  | 2 | 207.11   | 210.21   | 12.74   | o |
| 1012 | 2 | 11  | -7 | 2 | 28.45    | -6.37    | 19.11   | < |
| 1012 | 1 | -11 | 7  | 2 | 28.45    | -6.37    | 19.11   | < |
| 1013 | 2 | 10  | -7 | 2 | 113.58   | 114.66   | 12.74   | o |
| 1013 | 1 | -10 | 7  | 2 | 113.58   | 114.66   | 12.74   | o |
| 1014 | 2 | 9   | -7 | 2 | 25.49    | 31.85    | 9.55    | o |
| 1014 | 1 | -9  | 7  | 2 | 25.49    | 31.85    | 9.55    | o |
| 1015 | 2 | 8   | -7 | 2 | 24.49    | 28.66    | 6.37    | o |
| 1015 | 1 | -8  | 7  | 2 | 24.49    | 28.66    | 6.37    | o |
| 1016 | 2 | 7   | -7 | 2 | 27.44    | 31.85    | 3.18    | o |
| 1016 | 1 | -7  | 7  | 2 | 27.44    | 31.85    | 3.18    | o |
| 1017 | 2 | 6   | -7 | 2 | 10.17    | 6.37     | 3.18    | < |
| 1017 | 1 | -6  | 7  | 2 | 10.17    | 6.37     | 3.18    | < |
| 1018 | 2 | 5   | -7 | 2 | 15.61    | 19.11    | 3.18    | o |
| 1018 | 1 | -5  | 7  | 2 | 15.61    | 19.11    | 3.18    | o |

|      |   |     |    |   |          |          |         |   |
|------|---|-----|----|---|----------|----------|---------|---|
| 1019 | 2 | 4   | -7 | 2 | 17.22    | 25.48    | 3.18    | o |
| 1019 | 1 | -4  | 7  | 2 | 17.22    | 25.48    | 3.18    | o |
| 1020 | 2 | 3   | -7 | 2 | 952.78   | 901.33   | 28.66   | o |
| 1020 | 1 | -3  | 7  | 2 | 952.78   | 901.33   | 28.66   | o |
| 1021 | 2 | 2   | -7 | 2 | 377.19   | 318.49   | 12.74   | o |
| 1021 | 1 | -2  | 7  | 2 | 377.19   | 318.49   | 12.74   | o |
| 1022 | 2 | -1  | -7 | 2 | 108.78   | 101.92   | 6.37    | o |
| 1022 | 1 | 1   | 7  | 2 | 108.78   | 101.92   | 6.37    | o |
| 1023 | 2 | -2  | -7 | 2 | 303.77   | 296.20   | 9.55    | o |
| 1023 | 1 | 2   | 7  | 2 | 303.77   | 296.20   | 9.55    | o |
| 1024 | 2 | -3  | -7 | 2 | 892.29   | 898.15   | 35.03   | o |
| 1024 | 1 | 3   | 7  | 2 | 892.29   | 898.15   | 35.03   | o |
| 1025 | 2 | -4  | -7 | 2 | 49.61    | 47.77    | 3.18    | o |
| 1025 | 1 | 4   | 7  | 2 | 49.61    | 47.77    | 3.18    | o |
| 1026 | 2 | -5  | -7 | 2 | 49.74    | 50.96    | 3.18    | o |
| 1026 | 1 | 5   | 7  | 2 | 49.74    | 50.96    | 3.18    | o |
| 1027 | 2 | -6  | -7 | 2 | 38.38    | 31.85    | 3.18    | o |
| 1027 | 1 | 6   | 7  | 2 | 38.38    | 31.85    | 3.18    | o |
| 1028 | 2 | -7  | -7 | 2 | 19.08    | 15.92    | 3.18    | o |
| 1028 | 1 | 7   | 7  | 2 | 19.08    | 15.92    | 3.18    | o |
| 1029 | 2 | -8  | -7 | 2 | 10.94    | 6.37     | 3.18    | < |
| 1029 | 1 | 8   | 7  | 2 | 10.94    | 6.37     | 3.18    | < |
| 1030 | 2 | -9  | -7 | 2 | 51.80    | 41.40    | 6.37    | o |
| 1030 | 1 | 9   | 7  | 2 | 51.80    | 41.40    | 6.37    | o |
| 1031 | 2 | -10 | -7 | 2 | 48.96    | 66.88    | 6.37    | o |
| 1031 | 1 | 10  | 7  | 2 | 48.96    | 66.88    | 6.37    | o |
| 1032 | 2 | -11 | -7 | 2 | 106.90   | 133.77   | 9.55    | o |
| 1032 | 1 | 11  | 7  | 2 | 106.90   | 133.77   | 9.55    | o |
| 1033 | 2 | -12 | -7 | 2 | 226.48   | 273.90   | 15.92   | o |
| 1033 | 1 | 12  | 7  | 2 | 226.48   | 273.90   | 15.92   | o |
| 1034 | 2 | -13 | -7 | 2 | 36.31    | 60.51    | 6.37    | o |
| 1034 | 1 | 13  | 7  | 2 | 36.31    | 60.51    | 6.37    | o |
| 1035 | 2 | 13  | -8 | 2 | 46.90    | 22.29    | 9.55    | < |
| 1035 | 1 | -13 | 8  | 2 | 46.90    | 22.29    | 9.55    | < |
| 1036 | 2 | 12  | -8 | 2 | 4116.58  | 5038.55  | 222.95  | o |
| 1036 | 1 | -12 | 8  | 2 | 4116.58  | 5038.55  | 222.95  | o |
| 1037 | 2 | 11  | -8 | 2 | 91.43    | 66.88    | 95.55   | < |
| 1037 | 1 | -11 | 8  | 2 | 91.43    | 66.88    | 95.55   | < |
| 1038 | 2 | 10  | -8 | 2 | 50.46    | 85.99    | 6.37    | o |
| 1038 | 1 | -10 | 8  | 2 | 50.46    | 85.99    | 6.37    | o |
| 1039 | 2 | 9   | -8 | 2 | 228.61   | 178.36   | 12.74   | o |
| 1039 | 1 | -9  | 8  | 2 | 228.61   | 178.36   | 12.74   | o |
| 1040 | 2 | 8   | -8 | 2 | 852.76   | 840.82   | 44.59   | o |
| 1040 | 1 | -8  | 8  | 2 | 852.76   | 840.82   | 44.59   | o |
| 1041 | 2 | 7   | -8 | 2 | 3795.00  | 4685.03  | 286.64  | o |
| 1041 | 1 | -7  | 8  | 2 | 3795.00  | 4685.03  | 286.64  | o |
| 1042 | 2 | 6   | -8 | 2 | 14032.70 | 12870.30 | 449.08  | o |
| 1042 | 1 | -6  | 8  | 2 | 14032.70 | 12870.30 | 449.08  | o |
| 1043 | 2 | 5   | -8 | 2 | 108.67   | 140.14   | 6.37    | o |
| 1043 | 1 | -5  | 8  | 2 | 108.67   | 140.14   | 6.37    | o |
| 1044 | 2 | 4   | -8 | 2 | 204.09   | 277.09   | 12.74   | o |
| 1044 | 1 | -4  | 8  | 2 | 204.09   | 277.09   | 12.74   | o |
| 1045 | 2 | 3   | -8 | 2 | 20950.90 | 20243.40 | 611.51  | o |
| 1045 | 1 | -3  | 8  | 2 | 20950.90 | 20243.40 | 611.51  | o |
| 1046 | 2 | 2   | -8 | 2 | 12930.20 | 12561.40 | 439.52  | o |
| 1046 | 1 | -2  | 8  | 2 | 12930.20 | 12561.40 | 439.52  | o |
| 1047 | 2 | 1   | -8 | 2 | 32655.60 | 35349.50 | 1066.95 | o |
| 1047 | 1 | -1  | 8  | 2 | 32655.60 | 35349.50 | 1066.95 | o |



|      |   |     |    |   |          |          |         |   |
|------|---|-----|----|---|----------|----------|---------|---|
| 1048 | 2 | 0   | -8 | 2 | 21722.10 | 23727.70 | 716.61  | o |
| 1048 | 1 | 0   | 8  | 2 | 21722.10 | 23727.70 | 716.61  | o |
| 1049 | 2 | -1  | -8 | 2 | 34850.90 | 36139.40 | 1089.24 | o |
| 1049 | 1 | 1   | 8  | 2 | 34850.90 | 36139.40 | 1089.24 | o |
| 1050 | 2 | -2  | -8 | 2 | 13013.80 | 12354.30 | 433.15  | o |
| 1050 | 1 | 2   | 8  | 2 | 13013.80 | 12354.30 | 433.15  | o |
| 1051 | 2 | -3  | -8 | 2 | 20172.20 | 21138.40 | 643.35  | o |
| 1051 | 1 | 3   | 8  | 2 | 20172.20 | 21138.40 | 643.35  | o |
| 1052 | 2 | -5  | -8 | 2 | 262.46   | 270.72   | 12.74   | o |
| 1052 | 1 | 5   | 8  | 2 | 262.46   | 270.72   | 12.74   | o |
| 1053 | 2 | -6  | -8 | 2 | 12004.70 | 11430.70 | 347.16  | o |
| 1053 | 1 | 6   | 8  | 2 | 12004.70 | 11430.70 | 347.16  | o |
| 1054 | 2 | -7  | -8 | 2 | 4634.42  | 4318.76  | 130.58  | o |
| 1054 | 1 | 7   | 8  | 2 | 4634.42  | 4318.76  | 130.58  | o |
| 1055 | 2 | -8  | -8 | 2 | 1249.53  | 1213.46  | 44.59   | o |
| 1055 | 1 | 8   | 8  | 2 | 1249.53  | 1213.46  | 44.59   | o |
| 1056 | 2 | -9  | -8 | 2 | 78.37    | 89.18    | 9.55    | o |
| 1056 | 1 | 9   | 8  | 2 | 78.37    | 89.18    | 9.55    | o |
| 1057 | 2 | -10 | -8 | 2 | 31.53    | 60.51    | 6.37    | o |
| 1057 | 1 | 10  | 8  | 2 | 31.53    | 60.51    | 6.37    | o |
| 1058 | 2 | -11 | -8 | 2 | 212.89   | 232.50   | 15.92   | o |
| 1058 | 1 | 11  | 8  | 2 | 212.89   | 232.50   | 15.92   | o |
| 1059 | 2 | -12 | -8 | 2 | 4312.11  | 5433.49  | 235.68  | o |
| 1059 | 1 | 12  | 8  | 2 | 4312.11  | 5433.49  | 235.68  | o |
| 1060 | 2 | -13 | -8 | 2 | 108.71   | 124.21   | 12.74   | o |
| 1060 | 1 | 13  | 8  | 2 | 108.71   | 124.21   | 12.74   | o |
| 1061 | 2 | 12  | -9 | 2 | 30.24    | 38.22    | 6.37    | o |
| 1061 | 1 | -12 | 9  | 2 | 30.24    | 38.22    | 6.37    | o |
| 1062 | 2 | 11  | -9 | 2 | 121.79   | 133.77   | 12.74   | o |
| 1062 | 1 | -11 | 9  | 2 | 121.79   | 133.77   | 12.74   | o |
| 1063 | 2 | 10  | -9 | 2 | 620.59   | 550.99   | 200.65  | < |
| 1063 | 1 | -10 | 9  | 2 | 620.59   | 550.99   | 200.65  | < |
| 1064 | 2 | 9   | -9 | 2 | 4.51     | 6.37     | 3.18    | < |
| 1064 | 1 | -9  | 9  | 2 | 4.51     | 6.37     | 3.18    | < |
| 1065 | 2 | 8   | -9 | 2 | 269.29   | 194.28   | 12.74   | o |
| 1065 | 1 | -8  | 9  | 2 | 269.29   | 194.28   | 12.74   | o |
| 1066 | 2 | 7   | -9 | 2 | 599.49   | 579.66   | 19.11   | o |
| 1066 | 1 | -7  | 9  | 2 | 599.49   | 579.66   | 19.11   | o |
| 1067 | 2 | 6   | -9 | 2 | 2391.10  | 2356.85  | 73.25   | o |
| 1067 | 1 | -6  | 9  | 2 | 2391.10  | 2356.85  | 73.25   | o |
| 1068 | 2 | 5   | -9 | 2 | 912.81   | 901.33   | 35.03   | o |
| 1068 | 1 | -5  | 9  | 2 | 912.81   | 901.33   | 35.03   | o |
| 1069 | 2 | 1   | -9 | 2 | 757.04   | 652.91   | 25.48   | o |
| 1069 | 1 | -1  | 9  | 2 | 757.04   | 652.91   | 25.48   | o |
| 1070 | 2 | 0   | -9 | 2 | 417.11   | 471.37   | 22.29   | o |
| 1070 | 1 | 0   | 9  | 2 | 417.11   | 471.37   | 22.29   | o |
| 1071 | 2 | -2  | -9 | 2 | 1177.04  | 1175.24  | 38.22   | o |
| 1071 | 1 | 2   | 9  | 2 | 1177.04  | 1175.24  | 38.22   | o |
| 1072 | 2 | -3  | -9 | 2 | 1073.82  | 882.22   | 28.66   | o |
| 1072 | 1 | 3   | 9  | 2 | 1073.82  | 882.22   | 28.66   | o |
| 1073 | 2 | -4  | -9 | 2 | 859.21   | 914.07   | 44.59   | o |
| 1073 | 1 | 4   | 9  | 2 | 859.21   | 914.07   | 44.59   | o |
| 1074 | 2 | -5  | -9 | 2 | 986.80   | 971.40   | 31.85   | o |
| 1074 | 1 | 5   | 9  | 2 | 986.80   | 971.40   | 31.85   | o |
| 1075 | 2 | -6  | -9 | 2 | 2661.98  | 2640.30  | 82.81   | o |
| 1075 | 1 | 6   | 9  | 2 | 2661.98  | 2640.30  | 82.81   | o |
| 1076 | 2 | -7  | -9 | 2 | 177.47   | 191.10   | 28.66   | o |
| 1076 | 1 | 7   | 9  | 2 | 177.47   | 191.10   | 28.66   | o |

|      |   |     |     |   |          |          |         |   |
|------|---|-----|-----|---|----------|----------|---------|---|
| 1077 | 2 | -8  | -9  | 2 | 144.12   | 121.03   | 6.37    | o |
| 1077 | 1 | 8   | 9   | 2 | 144.12   | 121.03   | 6.37    | o |
| 1078 | 2 | -9  | -9  | 2 | 13.65    | 12.74    | 3.18    | o |
| 1078 | 1 | 9   | 9   | 2 | 13.65    | 12.74    | 3.18    | o |
| 1079 | 2 | -10 | -9  | 2 | 427.65   | 401.30   | 47.77   | o |
| 1079 | 1 | 10  | 9   | 2 | 427.65   | 401.30   | 47.77   | o |
| 1080 | 2 | -11 | -9  | 2 | 135.47   | 133.77   | 9.55    | o |
| 1080 | 1 | 11  | 9   | 2 | 135.47   | 133.77   | 9.55    | o |
| 1081 | 2 | -12 | -9  | 2 | 27.83    | 31.85    | 6.37    | o |
| 1081 | 1 | 12  | 9   | 2 | 27.83    | 31.85    | 6.37    | o |
| 1082 | 2 | -13 | -9  | 2 | 295.60   | 445.89   | 25.48   | o |
| 1082 | 1 | 13  | 9   | 2 | 295.60   | 445.89   | 25.48   | o |
| 1083 | 2 | 12  | -10 | 2 | 548.22   | 815.34   | 44.59   | o |
| 1083 | 1 | -12 | 10  | 2 | 548.22   | 815.34   | 44.59   | o |
| 1084 | 2 | 11  | -10 | 2 | 76.87    | 28.66    | 47.77   | < |
| 1084 | 1 | -11 | 10  | 2 | 76.87    | 28.66    | 47.77   | < |
| 1085 | 2 | 10  | -10 | 2 | 4770.60  | 4821.98  | 210.21  | o |
| 1085 | 1 | -10 | 10  | 2 | 4770.60  | 4821.98  | 210.21  | o |
| 1086 | 2 | 9   | -10 | 2 | 1490.25  | 1471.44  | 66.88   | o |
| 1086 | 1 | -9  | 10  | 2 | 1490.25  | 1471.44  | 66.88   | o |
| 1087 | 2 | 8   | -10 | 2 | 7986.41  | 8854.10  | 379.01  | o |
| 1087 | 1 | -8  | 10  | 2 | 7986.41  | 8854.10  | 379.01  | o |
| 1088 | 2 | 7   | -10 | 2 | 750.45   | 477.74   | 35.03   | o |
| 1088 | 1 | -7  | 10  | 2 | 750.45   | 477.74   | 35.03   | o |
| 1089 | 2 | 6   | -10 | 2 | 27308.80 | 26075.00 | 786.68  | o |
| 1089 | 1 | -6  | 10  | 2 | 27308.80 | 26075.00 | 786.68  | o |
| 1090 | 2 | 5   | -10 | 2 | 519.78   | 678.39   | 22.29   | o |
| 1090 | 1 | -5  | 10  | 2 | 519.78   | 678.39   | 22.29   | o |
| 1091 | 2 | 4   | -10 | 2 | 58975.20 | 56035.60 | 1688.01 | o |
| 1091 | 1 | -4  | 10  | 2 | 58975.20 | 56035.60 | 1688.01 | o |
| 1092 | 2 | 3   | -10 | 2 | 432.25   | 388.56   | 15.92   | o |
| 1092 | 1 | -3  | 10  | 2 | 432.25   | 388.56   | 15.92   | o |
| 1093 | 2 | 2   | -10 | 2 | 48757.40 | 46487.20 | 1981.02 | o |
| 1093 | 1 | -2  | 10  | 2 | 48757.40 | 46487.20 | 1981.02 | o |
| 1094 | 2 | 1   | -10 | 2 | 14109.70 | 13357.60 | 573.29  | o |
| 1094 | 1 | -1  | 10  | 2 | 14109.70 | 13357.60 | 573.29  | o |
| 1095 | 2 | -1  | -10 | 2 | 15228.90 | 13860.80 | 420.41  | o |
| 1095 | 1 | 1   | 10  | 2 | 15228.90 | 13860.80 | 420.41  | o |
| 1096 | 2 | -2  | -10 | 2 | 45455.80 | 46092.30 | 1605.20 | o |
| 1096 | 1 | 2   | 10  | 2 | 45455.80 | 46092.30 | 1605.20 | o |
| 1097 | 2 | -4  | -10 | 2 | 61670.20 | 59198.20 | 2067.02 | o |
| 1097 | 1 | 4   | 10  | 2 | 61670.20 | 59198.20 | 2067.02 | o |
| 1098 | 2 | -5  | -10 | 2 | 749.37   | 824.90   | 28.66   | o |
| 1098 | 1 | 5   | 10  | 2 | 749.37   | 824.90   | 28.66   | o |
| 1099 | 2 | -6  | -10 | 2 | 24475.00 | 25071.70 | 761.20  | o |
| 1099 | 1 | 6   | 10  | 2 | 24475.00 | 25071.70 | 761.20  | o |
| 1100 | 2 | -7  | -10 | 2 | 1966.58  | 1576.54  | 57.33   | o |
| 1100 | 1 | 7   | 10  | 2 | 1966.58  | 1576.54  | 57.33   | o |
| 1101 | 2 | -8  | -10 | 2 | 10266.70 | 9962.45  | 302.57  | o |
| 1101 | 1 | 8   | 10  | 2 | 10266.70 | 9962.45  | 302.57  | o |
| 1102 | 2 | -9  | -10 | 2 | 1111.64  | 1000.07  | 38.22   | o |
| 1102 | 1 | 9   | 10  | 2 | 1111.64  | 1000.07  | 38.22   | o |
| 1103 | 2 | -10 | -10 | 2 | 3516.27  | 3006.57  | 187.91  | o |
| 1103 | 1 | 10  | 10  | 2 | 3516.27  | 3006.57  | 187.91  | o |
| 1104 | 2 | -11 | -10 | 2 | 313.43   | 366.27   | 22.29   | o |
| 1104 | 1 | 11  | 10  | 2 | 313.43   | 366.27   | 22.29   | o |
| 1105 | 2 | -12 | -10 | 2 | 371.80   | 410.86   | 35.03   | o |
| 1105 | 1 | 12  | 10  | 2 | 371.80   | 410.86   | 35.03   | o |

|      |   |     |     |   |         |         |        |   |
|------|---|-----|-----|---|---------|---------|--------|---|
| 1106 | 2 | -13 | -10 | 2 | 274.38  | 343.97  | 25.48  | o |
| 1106 | 1 | 13  | 10  | 2 | 274.38  | 343.97  | 25.48  | o |
| 1107 | 2 | 12  | -11 | 2 | 93.35   | 127.40  | 12.74  | o |
| 1107 | 1 | -12 | 11  | 2 | 93.35   | 127.40  | 12.74  | o |
| 1108 | 2 | 11  | -11 | 2 | 89.01   | 101.92  | 9.55   | o |
| 1108 | 1 | -11 | 11  | 2 | 89.01   | 101.92  | 9.55   | o |
| 1109 | 2 | 10  | -11 | 2 | 717.01  | 758.01  | 38.22  | o |
| 1109 | 1 | -10 | 11  | 2 | 717.01  | 758.01  | 38.22  | o |
| 1110 | 2 | 9   | -11 | 2 | 10.48   | 19.11   | 3.18   | o |
| 1110 | 1 | -9  | 11  | 2 | 10.48   | 19.11   | 3.18   | o |
| 1111 | 2 | 8   | -11 | 2 | 814.13  | 684.76  | 35.03  | o |
| 1111 | 1 | -8  | 11  | 2 | 814.13  | 684.76  | 35.03  | o |
| 1112 | 2 | 7   | -11 | 2 | 34.11   | 31.85   | 3.18   | o |
| 1112 | 1 | -7  | 11  | 2 | 34.11   | 31.85   | 3.18   | o |
| 1113 | 2 | 6   | -11 | 2 | 1083.70 | 1159.31 | 38.22  | o |
| 1113 | 1 | -6  | 11  | 2 | 1083.70 | 1159.31 | 38.22  | o |
| 1114 | 2 | 5   | -11 | 2 | 1277.96 | 1130.65 | 35.03  | o |
| 1114 | 1 | -5  | 11  | 2 | 1277.96 | 1130.65 | 35.03  | o |
| 1115 | 2 | 4   | -11 | 2 | 226.81  | 315.31  | 12.74  | o |
| 1115 | 1 | -4  | 11  | 2 | 226.81  | 315.31  | 12.74  | o |
| 1116 | 2 | 3   | -11 | 2 | 48.62   | 54.14   | 6.37   | o |
| 1116 | 1 | -3  | 11  | 2 | 48.62   | 54.14   | 6.37   | o |
| 1117 | 2 | 2   | -11 | 2 | 166.65  | 156.06  | 6.37   | o |
| 1117 | 1 | -2  | 11  | 2 | 166.65  | 156.06  | 6.37   | o |
| 1118 | 2 | 1   | -11 | 2 | 70.65   | 79.62   | 6.37   | o |
| 1118 | 1 | -1  | 11  | 2 | 70.65   | 79.62   | 6.37   | o |
| 1119 | 2 | -1  | -11 | 2 | 56.92   | 66.88   | 6.37   | o |
| 1119 | 1 | 1   | 11  | 2 | 56.92   | 66.88   | 6.37   | o |
| 1120 | 2 | -2  | -11 | 2 | 153.77  | 162.43  | 6.37   | o |
| 1120 | 1 | 2   | 11  | 2 | 153.77  | 162.43  | 6.37   | o |
| 1121 | 2 | -3  | -11 | 2 | 58.18   | 54.14   | 3.18   | o |
| 1121 | 1 | 3   | 11  | 2 | 58.18   | 54.14   | 3.18   | o |
| 1122 | 2 | -4  | -11 | 2 | 557.18  | 465.00  | 15.92  | o |
| 1122 | 1 | 4   | 11  | 2 | 557.18  | 465.00  | 15.92  | o |
| 1123 | 2 | -5  | -11 | 2 | 1057.53 | 1101.98 | 38.22  | o |
| 1123 | 1 | 5   | 11  | 2 | 1057.53 | 1101.98 | 38.22  | o |
| 1124 | 2 | -6  | -11 | 2 | 1415.89 | 1353.59 | 50.96  | o |
| 1124 | 1 | 6   | 11  | 2 | 1415.89 | 1353.59 | 50.96  | o |
| 1125 | 2 | -7  | -11 | 2 | 15.14   | 25.48   | 3.18   | o |
| 1125 | 1 | 7   | 11  | 2 | 15.14   | 25.48   | 3.18   | o |
| 1126 | 2 | -8  | -11 | 2 | 452.86  | 452.26  | 22.29  | o |
| 1126 | 1 | 8   | 11  | 2 | 452.86  | 452.26  | 22.29  | o |
| 1127 | 2 | -9  | -11 | 2 | 42.55   | 38.22   | 3.18   | o |
| 1127 | 1 | 9   | 11  | 2 | 42.55   | 38.22   | 3.18   | o |
| 1128 | 2 | -10 | -11 | 2 | 398.35  | 541.44  | 41.40  | o |
| 1128 | 1 | 10  | 11  | 2 | 398.35  | 541.44  | 41.40  | o |
| 1129 | 2 | -11 | -11 | 2 | 40.39   | 38.22   | 6.37   | o |
| 1129 | 1 | 11  | 11  | 2 | 40.39   | 38.22   | 6.37   | o |
| 1130 | 2 | -12 | -11 | 2 | 46.10   | 57.33   | 6.37   | o |
| 1130 | 1 | 12  | 11  | 2 | 46.10   | 57.33   | 6.37   | o |
| 1131 | 2 | -13 | -11 | 2 | 53.60   | 57.33   | 15.92  | o |
| 1131 | 1 | 13  | 11  | 2 | 53.60   | 57.33   | 15.92  | o |
| 1132 | 2 | 12  | -12 | 2 | 4946.16 | 6261.57 | 286.64 | o |
| 1132 | 1 | -12 | 12  | 2 | 4946.16 | 6261.57 | 286.64 | o |
| 1133 | 2 | 11  | -12 | 2 | 17.94   | 19.11   | 31.85  | < |
| 1133 | 1 | -11 | 12  | 2 | 17.94   | 19.11   | 31.85  | < |
| 1134 | 2 | 10  | -12 | 2 | 2231.17 | 2226.26 | 143.32 | o |
| 1134 | 1 | -10 | 12  | 2 | 2231.17 | 2226.26 | 143.32 | o |

|      |   |     |     |   |          |          |         |   |
|------|---|-----|-----|---|----------|----------|---------|---|
| 1135 | 2 | 9   | -12 | 2 | 1615.46  | 1372.70  | 63.70   | o |
| 1135 | 1 | -9  | 12  | 2 | 1615.46  | 1372.70  | 63.70   | o |
| 1136 | 2 | 8   | -12 | 2 | 627.47   | 576.47   | 25.48   | o |
| 1136 | 1 | -8  | 12  | 2 | 627.47   | 576.47   | 25.48   | o |
| 1137 | 2 | 7   | -12 | 2 | 502.51   | 429.96   | 41.40   | o |
| 1137 | 1 | -7  | 12  | 2 | 502.51   | 429.96   | 41.40   | o |
| 1138 | 2 | 6   | -12 | 2 | 324.81   | 372.64   | 12.74   | o |
| 1138 | 1 | -6  | 12  | 2 | 324.81   | 372.64   | 12.74   | o |
| 1139 | 2 | 5   | -12 | 2 | 1104.16  | 1066.95  | 41.40   | o |
| 1139 | 1 | -5  | 12  | 2 | 1104.16  | 1066.95  | 41.40   | o |
| 1140 | 2 | 4   | -12 | 2 | 86.19    | 98.73    | 6.37    | o |
| 1140 | 1 | -4  | 12  | 2 | 86.19    | 98.73    | 6.37    | o |
| 1141 | 2 | 3   | -12 | 2 | 1485.73  | 1238.94  | 41.40   | o |
| 1141 | 1 | -3  | 12  | 2 | 1485.73  | 1238.94  | 41.40   | o |
| 1142 | 2 | 2   | -12 | 2 | 4753.79  | 4732.80  | 168.80  | o |
| 1142 | 1 | -2  | 12  | 2 | 4753.79  | 4732.80  | 168.80  | o |
| 1143 | 2 | 1   | -12 | 2 | 1024.79  | 1057.40  | 41.40   | o |
| 1143 | 1 | -1  | 12  | 2 | 1024.79  | 1057.40  | 41.40   | o |
| 1144 | 2 | 0   | -12 | 2 | 62681.30 | 63552.00 | 1917.33 | o |
| 1144 | 1 | 0   | 12  | 2 | 62681.30 | 63552.00 | 1917.33 | o |
| 1145 | 2 | -1  | -12 | 2 | 1016.79  | 1095.61  | 35.03   | o |
| 1145 | 1 | 1   | 12  | 2 | 1016.79  | 1095.61  | 35.03   | o |
| 1146 | 2 | -2  | -12 | 2 | 5003.53  | 4958.93  | 175.17  | o |
| 1146 | 1 | 2   | 12  | 2 | 5003.53  | 4958.93  | 175.17  | o |
| 1147 | 2 | -3  | -12 | 2 | 1474.45  | 1324.93  | 47.77   | o |
| 1147 | 1 | 3   | 12  | 2 | 1474.45  | 1324.93  | 47.77   | o |
| 1148 | 2 | -5  | -12 | 2 | 1046.13  | 1051.03  | 35.03   | o |
| 1148 | 1 | 5   | 12  | 2 | 1046.13  | 1051.03  | 35.03   | o |
| 1149 | 2 | -6  | -12 | 2 | 387.51   | 436.33   | 15.92   | o |
| 1149 | 1 | 6   | 12  | 2 | 387.51   | 436.33   | 15.92   | o |
| 1150 | 2 | -7  | -12 | 2 | 842.98   | 738.90   | 28.66   | o |
| 1150 | 1 | 7   | 12  | 2 | 842.98   | 738.90   | 28.66   | o |
| 1151 | 2 | -8  | -12 | 2 | 534.66   | 557.36   | 19.11   | o |
| 1151 | 1 | 8   | 12  | 2 | 534.66   | 557.36   | 19.11   | o |
| 1152 | 2 | -9  | -12 | 2 | 2023.46  | 1700.75  | 60.51   | o |
| 1152 | 1 | 9   | 12  | 2 | 2023.46  | 1700.75  | 60.51   | o |
| 1153 | 2 | -10 | -12 | 2 | 2540.75  | 2544.76  | 114.66  | o |
| 1153 | 1 | 10  | 12  | 2 | 2540.75  | 2544.76  | 114.66  | o |
| 1154 | 2 | -11 | -12 | 2 | 62.95    | 101.92   | 15.92   | o |
| 1154 | 1 | 11  | 12  | 2 | 62.95    | 101.92   | 15.92   | o |
| 1155 | 2 | -12 | -12 | 2 | 4675.98  | 6347.56  | 302.57  | o |
| 1155 | 1 | 12  | 12  | 2 | 4675.98  | 6347.56  | 302.57  | o |
| 1156 | 2 | 12  | -13 | 2 | 492.72   | 557.36   | 44.59   | o |
| 1156 | 1 | -12 | 13  | 2 | 492.72   | 557.36   | 44.59   | o |
| 1157 | 2 | 11  | -13 | 2 | 49.22    | 28.66    | 35.03   | < |
| 1157 | 1 | -11 | 13  | 2 | 49.22    | 28.66    | 35.03   | < |
| 1158 | 2 | 10  | -13 | 2 | 54.26    | 57.33    | 6.37    | o |
| 1158 | 1 | -10 | 13  | 2 | 54.26    | 57.33    | 6.37    | o |
| 1159 | 2 | 9   | -13 | 2 | 58.65    | 60.51    | 9.55    | o |
| 1159 | 1 | -9  | 13  | 2 | 58.65    | 60.51    | 9.55    | o |
| 1160 | 2 | 8   | -13 | 2 | 3.53     | 6.37     | 3.18    | < |
| 1160 | 1 | -8  | 13  | 2 | 3.53     | 6.37     | 3.18    | < |
| 1161 | 2 | 7   | -13 | 2 | 157.95   | 146.51   | 9.55    | o |
| 1161 | 1 | -7  | 13  | 2 | 157.95   | 146.51   | 9.55    | o |
| 1162 | 2 | 6   | -13 | 2 | 88.72    | 136.95   | 9.55    | o |
| 1162 | 1 | -6  | 13  | 2 | 88.72    | 136.95   | 9.55    | o |
| 1163 | 2 | 5   | -13 | 2 | 288.16   | 222.95   | 9.55    | o |
| 1163 | 1 | -5  | 13  | 2 | 288.16   | 222.95   | 9.55    | o |

|      |   |     |     |   |          |          |        |   |
|------|---|-----|-----|---|----------|----------|--------|---|
| 1164 | 2 | 4   | -13 | 2 | 25.69    | 38.22    | 3.18   | o |
| 1164 | 1 | -4  | 13  | 2 | 25.69    | 38.22    | 3.18   | o |
| 1165 | 2 | 3   | -13 | 2 | 173.79   | 143.32   | 9.55   | o |
| 1165 | 1 | -3  | 13  | 2 | 173.79   | 143.32   | 9.55   | o |
| 1166 | 2 | 2   | -13 | 2 | 75.75    | 79.62    | 6.37   | o |
| 1166 | 1 | -2  | 13  | 2 | 75.75    | 79.62    | 6.37   | o |
| 1167 | 2 | 0   | -13 | 2 | 25.00    | 38.22    | 3.18   | o |
| 1167 | 1 | 0   | 13  | 2 | 25.00    | 38.22    | 3.18   | o |
| 1168 | 2 | -2  | -13 | 2 | 76.40    | 73.25    | 6.37   | o |
| 1168 | 1 | 2   | 13  | 2 | 76.40    | 73.25    | 6.37   | o |
| 1169 | 2 | -3  | -13 | 2 | 74.56    | 105.10   | 6.37   | o |
| 1169 | 1 | 3   | 13  | 2 | 74.56    | 105.10   | 6.37   | o |
| 1170 | 2 | -4  | -13 | 2 | 41.79    | 47.77    | 3.18   | o |
| 1170 | 1 | 4   | 13  | 2 | 41.79    | 47.77    | 3.18   | o |
| 1171 | 2 | -7  | -13 | 2 | 278.23   | 270.72   | 12.74  | o |
| 1171 | 1 | 7   | 13  | 2 | 278.23   | 270.72   | 12.74  | o |
| 1172 | 2 | -8  | -13 | 2 | 11.70    | 25.48    | 3.18   | o |
| 1172 | 1 | 8   | 13  | 2 | 11.70    | 25.48    | 3.18   | o |
| 1173 | 2 | -9  | -13 | 2 | 14.35    | 19.11    | 3.18   | o |
| 1173 | 1 | 9   | 13  | 2 | 14.35    | 19.11    | 3.18   | o |
| 1174 | 2 | -10 | -13 | 2 | 64.23    | 73.25    | 6.37   | o |
| 1174 | 1 | 10  | 13  | 2 | 64.23    | 73.25    | 6.37   | o |
| 1175 | 2 | -11 | -13 | 2 | 104.56   | 105.10   | 9.55   | o |
| 1175 | 1 | 11  | 13  | 2 | 104.56   | 105.10   | 9.55   | o |
| 1176 | 2 | -12 | -13 | 2 | 471.98   | 611.51   | 44.59  | o |
| 1176 | 1 | 12  | 13  | 2 | 471.98   | 611.51   | 44.59  | o |
| 1177 | 2 | 12  | -14 | 2 | 2827.69  | 3426.98  | 159.25 | o |
| 1177 | 1 | -12 | 14  | 2 | 2827.69  | 3426.98  | 159.25 | o |
| 1178 | 2 | 11  | -14 | 2 | 64.32    | 98.73    | 9.55   | o |
| 1178 | 1 | -11 | 14  | 2 | 64.32    | 98.73    | 9.55   | o |
| 1179 | 2 | 10  | -14 | 2 | 5449.28  | 5624.58  | 245.24 | o |
| 1179 | 1 | -10 | 14  | 2 | 5449.28  | 5624.58  | 245.24 | o |
| 1180 | 2 | 9   | -14 | 2 | 757.55   | 1035.10  | 98.73  | o |
| 1180 | 1 | -9  | 14  | 2 | 757.55   | 1035.10  | 98.73  | o |
| 1181 | 2 | 8   | -14 | 2 | 9905.37  | 10513.40 | 318.49 | o |
| 1181 | 1 | -8  | 14  | 2 | 9905.37  | 10513.40 | 318.49 | o |
| 1182 | 2 | 7   | -14 | 2 | 74.85    | 63.70    | 22.29  | < |
| 1182 | 1 | -7  | 14  | 2 | 74.85    | 63.70    | 22.29  | < |
| 1183 | 2 | 5   | -14 | 2 | 432.54   | 391.75   | 15.92  | o |
| 1183 | 1 | -5  | 14  | 2 | 432.54   | 391.75   | 15.92  | o |
| 1184 | 2 | 4   | -14 | 2 | 8800.14  | 8650.26  | 264.35 | o |
| 1184 | 1 | -4  | 14  | 2 | 8800.14  | 8650.26  | 264.35 | o |
| 1185 | 2 | 3   | -14 | 2 | 3688.60  | 4054.41  | 124.21 | o |
| 1185 | 1 | -3  | 14  | 2 | 3688.60  | 4054.41  | 124.21 | o |
| 1186 | 2 | 2   | -14 | 2 | 9778.14  | 9634.40  | 293.01 | o |
| 1186 | 1 | -2  | 14  | 2 | 9778.14  | 9634.40  | 293.01 | o |
| 1187 | 2 | 1   | -14 | 2 | 2093.17  | 2289.96  | 73.25  | o |
| 1187 | 1 | -1  | 14  | 2 | 2093.17  | 2289.96  | 73.25  | o |
| 1188 | 2 | 0   | -14 | 2 | 8032.50  | 7717.08  | 235.68 | o |
| 1188 | 1 | 0   | 14  | 2 | 8032.50  | 7717.08  | 235.68 | o |
| 1189 | 2 | -1  | -14 | 2 | 2120.95  | 2318.63  | 73.25  | o |
| 1189 | 1 | 1   | 14  | 2 | 2120.95  | 2318.63  | 73.25  | o |
| 1190 | 2 | -2  | -14 | 2 | 10556.80 | 9847.79  | 347.16 | o |
| 1190 | 1 | 2   | 14  | 2 | 10556.80 | 9847.79  | 347.16 | o |
| 1191 | 2 | -3  | -14 | 2 | 4725.10  | 4544.89  | 149.69 | o |
| 1191 | 1 | 3   | 14  | 2 | 4725.10  | 4544.89  | 149.69 | o |
| 1192 | 2 | -4  | -14 | 2 | 7713.84  | 8433.69  | 257.98 | o |
| 1192 | 1 | 4   | 14  | 2 | 7713.84  | 8433.69  | 257.98 | o |

|      |   |     |     |   |         |         |        |   |
|------|---|-----|-----|---|---------|---------|--------|---|
| 1193 | 2 | -6  | -14 | 2 | 267.94  | 229.32  | 12.74  | o |
| 1193 | 1 | 6   | 14  | 2 | 267.94  | 229.32  | 12.74  | o |
| 1194 | 2 | -7  | -14 | 2 | 171.61  | 168.80  | 9.55   | o |
| 1194 | 1 | 7   | 14  | 2 | 171.61  | 168.80  | 9.55   | o |
| 1195 | 2 | -8  | -14 | 2 | 7957.26 | 8427.32 | 296.20 | o |
| 1195 | 1 | 8   | 14  | 2 | 7957.26 | 8427.32 | 296.20 | o |
| 1196 | 2 | -9  | -14 | 2 | 1489.22 | 1401.37 | 44.59  | o |
| 1196 | 1 | 9   | 14  | 2 | 1489.22 | 1401.37 | 44.59  | o |
| 1197 | 2 | -10 | -14 | 2 | 6536.34 | 6745.68 | 238.87 | o |
| 1197 | 1 | 10  | 14  | 2 | 6536.34 | 6745.68 | 238.87 | o |
| 1198 | 2 | -11 | -14 | 2 | 49.69   | 47.77   | 6.37   | o |
| 1198 | 1 | 11  | 14  | 2 | 49.69   | 47.77   | 6.37   | o |
| 1199 | 2 | -12 | -14 | 2 | 2219.49 | 2535.20 | 136.95 | o |
| 1199 | 1 | 12  | 14  | 2 | 2219.49 | 2535.20 | 136.95 | o |
| 1200 | 2 | 12  | -15 | 2 | 257.29  | 302.57  | 25.48  | o |
| 1200 | 1 | -12 | 15  | 2 | 257.29  | 302.57  | 25.48  | o |
| 1201 | 2 | 11  | -15 | 2 | 149.21  | 114.66  | 41.40  | < |
| 1201 | 1 | -11 | 15  | 2 | 149.21  | 114.66  | 41.40  | < |
| 1202 | 2 | 10  | -15 | 2 | 135.81  | 127.40  | 121.03 | < |
| 1202 | 1 | -10 | 15  | 2 | 135.81  | 127.40  | 121.03 | < |
| 1203 | 2 | 9   | -15 | 2 | 426.10  | 404.49  | 15.92  | o |
| 1203 | 1 | -9  | 15  | 2 | 426.10  | 404.49  | 15.92  | o |
| 1204 | 2 | 8   | -15 | 2 | 1703.07 | 1783.56 | 60.51  | o |
| 1204 | 1 | -8  | 15  | 2 | 1703.07 | 1783.56 | 60.51  | o |
| 1205 | 2 | 7   | -15 | 2 | 23.73   | 15.92   | 3.18   | o |
| 1205 | 1 | -7  | 15  | 2 | 23.73   | 15.92   | 3.18   | o |
| 1206 | 2 | 5   | -15 | 2 | 221.10  | 175.17  | 9.55   | o |
| 1206 | 1 | -5  | 15  | 2 | 221.10  | 175.17  | 9.55   | o |
| 1207 | 2 | 4   | -15 | 2 | 2772.06 | 3063.90 | 95.55  | o |
| 1207 | 1 | -4  | 15  | 2 | 2772.06 | 3063.90 | 95.55  | o |
| 1208 | 2 | 3   | -15 | 2 | 525.82  | 525.51  | 19.11  | o |
| 1208 | 1 | -3  | 15  | 2 | 525.82  | 525.51  | 19.11  | o |
| 1209 | 2 | 0   | -15 | 2 | 104.87  | 159.25  | 9.55   | o |
| 1209 | 1 | 0   | 15  | 2 | 104.87  | 159.25  | 9.55   | o |
| 1210 | 2 | -1  | -15 | 2 | 574.65  | 445.89  | 15.92  | o |
| 1210 | 1 | 1   | 15  | 2 | 574.65  | 445.89  | 15.92  | o |
| 1211 | 2 | -3  | -15 | 2 | 396.99  | 519.14  | 19.11  | o |
| 1211 | 1 | 3   | 15  | 2 | 396.99  | 519.14  | 19.11  | o |
| 1212 | 2 | -4  | -15 | 2 | 3481.96 | 3481.13 | 108.29 | o |
| 1212 | 1 | 4   | 15  | 2 | 3481.96 | 3481.13 | 108.29 | o |
| 1213 | 2 | -5  | -15 | 2 | 139.17  | 156.06  | 9.55   | o |
| 1213 | 1 | 5   | 15  | 2 | 139.17  | 156.06  | 9.55   | o |
| 1214 | 2 | -7  | -15 | 2 | 39.50   | 35.03   | 3.18   | o |
| 1214 | 1 | 7   | 15  | 2 | 39.50   | 35.03   | 3.18   | o |
| 1215 | 2 | -8  | -15 | 2 | 1397.17 | 1560.61 | 57.33  | o |
| 1215 | 1 | 8   | 15  | 2 | 1397.17 | 1560.61 | 57.33  | o |
| 1216 | 2 | -9  | -15 | 2 | 303.91  | 267.53  | 12.74  | o |
| 1216 | 1 | 9   | 15  | 2 | 303.91  | 267.53  | 12.74  | o |
| 1217 | 2 | -10 | -15 | 2 | 245.18  | 251.61  | 9.55   | o |
| 1217 | 1 | 10  | 15  | 2 | 245.18  | 251.61  | 9.55   | o |
| 1218 | 2 | -11 | -15 | 2 | 249.82  | 277.09  | 19.11  | o |
| 1218 | 1 | 11  | 15  | 2 | 249.82  | 277.09  | 19.11  | o |
| 1219 | 2 | -12 | -15 | 2 | 210.13  | 238.87  | 25.48  | o |
| 1219 | 1 | 12  | 15  | 2 | 210.13  | 238.87  | 25.48  | o |
| 1220 | 2 | 12  | -16 | 2 | 478.17  | 509.59  | 436.33 | < |
| 1220 | 1 | -12 | 16  | 2 | 478.17  | 509.59  | 436.33 | < |
| 1221 | 2 | 11  | -16 | 2 | 43.91   | 38.22   | 6.37   | o |
| 1221 | 1 | -11 | 16  | 2 | 43.91   | 38.22   | 6.37   | o |

|      |   |     |     |   |          |          |         |   |
|------|---|-----|-----|---|----------|----------|---------|---|
| 1222 | 2 | 10  | -16 | 2 | 2279.14  | 2239.00  | 178.36  | o |
| 1222 | 1 | -10 | 16  | 2 | 2279.14  | 2239.00  | 178.36  | o |
| 1223 | 2 | 9   | -16 | 2 | 1092.89  | 882.22   | 38.22   | o |
| 1223 | 1 | -9  | 16  | 2 | 1092.89  | 882.22   | 38.22   | o |
| 1224 | 2 | 8   | -16 | 2 | 1744.09  | 1538.32  | 50.96   | o |
| 1224 | 1 | -8  | 16  | 2 | 1744.09  | 1538.32  | 50.96   | o |
| 1225 | 2 | 7   | -16 | 2 | 2625.50  | 2891.91  | 95.55   | o |
| 1225 | 1 | -7  | 16  | 2 | 2625.50  | 2891.91  | 95.55   | o |
| 1226 | 2 | 6   | -16 | 2 | 37047.30 | 38645.90 | 1350.41 | o |
| 1226 | 1 | -6  | 16  | 2 | 37047.30 | 38645.90 | 1350.41 | o |
| 1227 | 2 | 5   | -16 | 2 | 413.18   | 398.12   | 15.92   | o |
| 1227 | 1 | -5  | 16  | 2 | 413.18   | 398.12   | 15.92   | o |
| 1228 | 2 | 4   | -16 | 2 | 19846.80 | 18775.10 | 656.09  | o |
| 1228 | 1 | -4  | 16  | 2 | 19846.80 | 18775.10 | 656.09  | o |
| 1229 | 2 | 3   | -16 | 2 | 4515.23  | 4662.73  | 143.32  | o |
| 1229 | 1 | -3  | 16  | 2 | 4515.23  | 4662.73  | 143.32  | o |
| 1230 | 2 | 2   | -16 | 2 | 799.34   | 707.05   | 28.66   | o |
| 1230 | 1 | -2  | 16  | 2 | 799.34   | 707.05   | 28.66   | o |
| 1231 | 2 | 1   | -16 | 2 | 75.89    | 89.18    | 6.37    | o |
| 1231 | 1 | -1  | 16  | 2 | 75.89    | 89.18    | 6.37    | o |
| 1232 | 2 | 0   | -16 | 2 | 8322.36  | 8389.10  | 254.79  | o |
| 1232 | 1 | 0   | 16  | 2 | 8322.36  | 8389.10  | 254.79  | o |
| 1233 | 2 | -1  | -16 | 2 | 61.91    | 89.18    | 6.37    | o |
| 1233 | 1 | 1   | 16  | 2 | 61.91    | 89.18    | 6.37    | o |
| 1234 | 2 | -2  | -16 | 2 | 753.04   | 713.42   | 25.48   | o |
| 1234 | 1 | 2   | 16  | 2 | 753.04   | 713.42   | 25.48   | o |
| 1235 | 2 | -3  | -16 | 2 | 5104.13  | 5016.26  | 178.36  | o |
| 1235 | 1 | 3   | 16  | 2 | 5104.13  | 5016.26  | 178.36  | o |
| 1236 | 2 | -4  | -16 | 2 | 18903.60 | 19370.70 | 589.21  | o |
| 1236 | 1 | 4   | 16  | 2 | 18903.60 | 19370.70 | 589.21  | o |
| 1237 | 2 | -6  | -16 | 2 | 37663.20 | 39894.40 | 1210.27 | o |
| 1237 | 1 | 6   | 16  | 2 | 37663.20 | 39894.40 | 1210.27 | o |
| 1238 | 2 | -7  | -16 | 2 | 2718.14  | 2904.65  | 92.36   | o |
| 1238 | 1 | 7   | 16  | 2 | 2718.14  | 2904.65  | 92.36   | o |
| 1239 | 2 | -8  | -16 | 2 | 1403.34  | 1216.64  | 41.40   | o |
| 1239 | 1 | 8   | 16  | 2 | 1403.34  | 1216.64  | 41.40   | o |
| 1240 | 2 | -9  | -16 | 2 | 1561.80  | 1477.81  | 57.33   | o |
| 1240 | 1 | 9   | 16  | 2 | 1561.80  | 1477.81  | 57.33   | o |
| 1241 | 2 | -10 | -16 | 2 | 1831.79  | 1563.80  | 50.96   | o |
| 1241 | 1 | 10  | 16  | 2 | 1831.79  | 1563.80  | 50.96   | o |
| 1242 | 2 | -11 | -16 | 2 | 44.32    | 57.33    | 12.74   | o |
| 1242 | 1 | 11  | 16  | 2 | 44.32    | 57.33    | 12.74   | o |
| 1243 | 2 | -12 | -16 | 2 | 611.82   | 939.55   | 70.07   | o |
| 1243 | 1 | 12  | 16  | 2 | 611.82   | 939.55   | 70.07   | o |
| 1244 | 2 | 12  | -17 | 2 | 3.44     | 9.55     | 6.37    | < |
| 1244 | 1 | -12 | 17  | 2 | 3.44     | 9.55     | 6.37    | < |
| 1245 | 2 | 11  | -17 | 2 | 41.99    | 44.59    | 6.37    | o |
| 1245 | 1 | -11 | 17  | 2 | 41.99    | 44.59    | 6.37    | o |
| 1246 | 2 | 10  | -17 | 2 | 252.87   | 264.35   | 19.11   | o |
| 1246 | 1 | -10 | 17  | 2 | 252.87   | 264.35   | 19.11   | o |
| 1247 | 2 | 9   | -17 | 2 | 79.89    | 85.99    | 6.37    | o |
| 1247 | 1 | -9  | 17  | 2 | 79.89    | 85.99    | 6.37    | o |
| 1248 | 2 | 8   | -17 | 2 | 81.29    | 95.55    | 6.37    | o |
| 1248 | 1 | -8  | 17  | 2 | 81.29    | 95.55    | 6.37    | o |
| 1249 | 2 | 7   | -17 | 2 | 58.14    | 60.51    | 6.37    | o |
| 1249 | 1 | -7  | 17  | 2 | 58.14    | 60.51    | 6.37    | o |
| 1250 | 2 | 6   | -17 | 2 | 1158.25  | 1044.66  | 35.03   | o |
| 1250 | 1 | -6  | 17  | 2 | 1158.25  | 1044.66  | 35.03   | o |

|      |   |     |     |   |          |          |        |   |
|------|---|-----|-----|---|----------|----------|--------|---|
| 1251 | 2 | 5   | -17 | 2 | 493.27   | 461.81   | 19.11  | o |
| 1251 | 1 | -5  | 17  | 2 | 493.27   | 461.81   | 19.11  | o |
| 1252 | 2 | 3   | -17 | 2 | 54.43    | 70.07    | 6.37   | o |
| 1252 | 1 | -3  | 17  | 2 | 54.43    | 70.07    | 6.37   | o |
| 1253 | 2 | 2   | -17 | 2 | 475.79   | 401.30   | 19.11  | o |
| 1253 | 1 | -2  | 17  | 2 | 475.79   | 401.30   | 19.11  | o |
| 1254 | 2 | 1   | -17 | 2 | 54.63    | 76.44    | 6.37   | o |
| 1254 | 1 | -1  | 17  | 2 | 54.63    | 76.44    | 6.37   | o |
| 1255 | 2 | 0   | -17 | 2 | 128.57   | 146.51   | 9.55   | o |
| 1255 | 1 | 0   | 17  | 2 | 128.57   | 146.51   | 9.55   | o |
| 1256 | 2 | -1  | -17 | 2 | 110.69   | 95.55    | 6.37   | o |
| 1256 | 1 | 1   | 17  | 2 | 110.69   | 95.55    | 6.37   | o |
| 1257 | 2 | -3  | -17 | 2 | 144.80   | 98.73    | 6.37   | o |
| 1257 | 1 | 3   | 17  | 2 | 144.80   | 98.73    | 6.37   | o |
| 1258 | 2 | -4  | -17 | 2 | 38.68    | 66.88    | 6.37   | o |
| 1258 | 1 | 4   | 17  | 2 | 38.68    | 66.88    | 6.37   | o |
| 1259 | 2 | -5  | -17 | 2 | 441.11   | 474.55   | 19.11  | o |
| 1259 | 1 | 5   | 17  | 2 | 441.11   | 474.55   | 19.11  | o |
| 1260 | 2 | -6  | -17 | 2 | 797.43   | 990.51   | 41.40  | o |
| 1260 | 1 | 6   | 17  | 2 | 797.43   | 990.51   | 41.40  | o |
| 1261 | 2 | -7  | -17 | 2 | 178.03   | 175.17   | 9.55   | o |
| 1261 | 1 | 7   | 17  | 2 | 178.03   | 175.17   | 9.55   | o |
| 1262 | 2 | -9  | -17 | 2 | 46.39    | 54.14    | 6.37   | o |
| 1262 | 1 | 9   | 17  | 2 | 46.39    | 54.14    | 6.37   | o |
| 1263 | 2 | -10 | -17 | 2 | 252.60   | 226.13   | 15.92  | o |
| 1263 | 1 | 10  | 17  | 2 | 252.60   | 226.13   | 15.92  | o |
| 1264 | 2 | -11 | -17 | 2 | 24.65    | 25.48    | 6.37   | o |
| 1264 | 1 | 11  | 17  | 2 | 24.65    | 25.48    | 6.37   | o |
| 1265 | 2 | -12 | -17 | 2 | 5.88     | 15.92    | 6.37   | < |
| 1265 | 1 | 12  | 17  | 2 | 5.88     | 15.92    | 6.37   | < |
| 1266 | 2 | 12  | -18 | 2 | 1281.75  | 1299.45  | 117.84 | o |
| 1266 | 1 | -12 | 18  | 2 | 1281.75  | 1299.45  | 117.84 | o |
| 1267 | 2 | 11  | -18 | 2 | 89.50    | 111.47   | 9.55   | o |
| 1267 | 1 | -11 | 18  | 2 | 89.50    | 111.47   | 9.55   | o |
| 1268 | 2 | 10  | -18 | 2 | 4590.11  | 4548.08  | 200.65 | o |
| 1268 | 1 | -10 | 18  | 2 | 4590.11  | 4548.08  | 200.65 | o |
| 1269 | 2 | 9   | -18 | 2 | 438.63   | 410.86   | 15.92  | o |
| 1269 | 1 | -9  | 18  | 2 | 438.63   | 410.86   | 15.92  | o |
| 1270 | 2 | 8   | -18 | 2 | 2957.90  | 3178.56  | 203.84 | o |
| 1270 | 1 | -8  | 18  | 2 | 2957.90  | 3178.56  | 203.84 | o |
| 1271 | 2 | 7   | -18 | 2 | 160.90   | 156.06   | 9.55   | o |
| 1271 | 1 | -7  | 18  | 2 | 160.90   | 156.06   | 9.55   | o |
| 1272 | 2 | 6   | -18 | 2 | 2081.35  | 2022.43  | 63.70  | o |
| 1272 | 1 | -6  | 18  | 2 | 2081.35  | 2022.43  | 63.70  | o |
| 1273 | 2 | 5   | -18 | 2 | 1171.74  | 1277.16  | 41.40  | o |
| 1273 | 1 | -5  | 18  | 2 | 1171.74  | 1277.16  | 41.40  | o |
| 1274 | 2 | 4   | -18 | 2 | 3445.83  | 4153.15  | 130.58 | o |
| 1274 | 1 | -4  | 18  | 2 | 3445.83  | 4153.15  | 130.58 | o |
| 1275 | 2 | 2   | -18 | 2 | 21018.60 | 20246.60 | 614.69 | o |
| 1275 | 1 | -2  | 18  | 2 | 21018.60 | 20246.60 | 614.69 | o |
| 1276 | 2 | 1   | -18 | 2 | 255.09   | 207.02   | 9.55   | o |
| 1276 | 1 | -1  | 18  | 2 | 255.09   | 207.02   | 9.55   | o |
| 1277 | 2 | 0   | -18 | 2 | 1675.06  | 1732.60  | 63.70  | o |
| 1277 | 1 | 0   | 18  | 2 | 1675.06  | 1732.60  | 63.70  | o |
| 1278 | 2 | -1  | -18 | 2 | 199.84   | 222.95   | 12.74  | o |
| 1278 | 1 | 1   | 18  | 2 | 199.84   | 222.95   | 12.74  | o |
| 1279 | 2 | -2  | -18 | 2 | 20282.00 | 20902.70 | 633.80 | o |
| 1279 | 1 | 2   | 18  | 2 | 20282.00 | 20902.70 | 633.80 | o |



|      |   |     |     |   |         |         |        |   |
|------|---|-----|-----|---|---------|---------|--------|---|
| 1280 | 2 | -3  | -18 | 2 | 384.51  | 410.86  | 15.92  | o |
| 1280 | 1 | 3   | 18  | 2 | 384.51  | 410.86  | 15.92  | o |
| 1281 | 2 | -4  | -18 | 2 | 4099.23 | 4315.58 | 133.77 | o |
| 1281 | 1 | 4   | 18  | 2 | 4099.23 | 4315.58 | 133.77 | o |
| 1282 | 2 | -5  | -18 | 2 | 1512.65 | 1490.55 | 47.77  | o |
| 1282 | 1 | 5   | 18  | 2 | 1512.65 | 1490.55 | 47.77  | o |
| 1283 | 2 | -6  | -18 | 2 | 1706.16 | 1875.92 | 60.51  | o |
| 1283 | 1 | 6   | 18  | 2 | 1706.16 | 1875.92 | 60.51  | o |
| 1284 | 2 | -7  | -18 | 2 | 397.77  | 356.71  | 15.92  | o |
| 1284 | 1 | 7   | 18  | 2 | 397.77  | 356.71  | 15.92  | o |
| 1285 | 2 | -8  | -18 | 2 | 4021.08 | 4130.85 | 127.40 | o |
| 1285 | 1 | 8   | 18  | 2 | 4021.08 | 4130.85 | 127.40 | o |
| 1286 | 2 | -9  | -18 | 2 | 144.96  | 98.73   | 9.55   | o |
| 1286 | 1 | 9   | 18  | 2 | 144.96  | 98.73   | 9.55   | o |
| 1287 | 2 | -10 | -18 | 2 | 3546.68 | 2799.55 | 114.66 | o |
| 1287 | 1 | 10  | 18  | 2 | 3546.68 | 2799.55 | 114.66 | o |
| 1288 | 2 | -11 | -18 | 2 | 48.57   | 54.14   | 15.92  | o |
| 1288 | 1 | 11  | 18  | 2 | 48.57   | 54.14   | 15.92  | o |
| 1289 | 2 | -12 | -18 | 2 | 1516.09 | 1793.11 | 178.36 | o |
| 1289 | 1 | 12  | 18  | 2 | 1516.09 | 1793.11 | 178.36 | o |
| 1290 | 2 | 11  | -19 | 2 | 2.29    | 6.37    | 3.18   | < |
| 1290 | 1 | -11 | 19  | 2 | 2.29    | 6.37    | 3.18   | < |
| 1291 | 2 | 10  | -19 | 2 | 146.46  | 165.62  | 12.74  | o |
| 1291 | 1 | -10 | 19  | 2 | 146.46  | 165.62  | 12.74  | o |
| 1292 | 2 | 9   | -19 | 2 | 45.81   | 38.22   | 6.37   | o |
| 1292 | 1 | -9  | 19  | 2 | 45.81   | 38.22   | 6.37   | o |
| 1293 | 2 | 8   | -19 | 2 | 10.85   | 9.55    | 3.18   | o |
| 1293 | 1 | -8  | 19  | 2 | 10.85   | 9.55    | 3.18   | o |
| 1294 | 2 | 7   | -19 | 2 | 278.03  | 261.16  | 12.74  | o |
| 1294 | 1 | -7  | 19  | 2 | 278.03  | 261.16  | 12.74  | o |
| 1295 | 2 | 6   | -19 | 2 | 115.11  | 146.51  | 9.55   | o |
| 1295 | 1 | -6  | 19  | 2 | 115.11  | 146.51  | 9.55   | o |
| 1296 | 2 | 5   | -19 | 2 | 622.91  | 541.44  | 25.48  | o |
| 1296 | 1 | -5  | 19  | 2 | 622.91  | 541.44  | 25.48  | o |
| 1297 | 2 | 4   | -19 | 2 | 453.31  | 592.40  | 22.29  | o |
| 1297 | 1 | -4  | 19  | 2 | 453.31  | 592.40  | 22.29  | o |
| 1298 | 2 | 0   | -19 | 2 | 85.39   | 136.95  | 9.55   | o |
| 1298 | 1 | 0   | 19  | 2 | 85.39   | 136.95  | 9.55   | o |
| 1299 | 2 | -1  | -19 | 2 | 290.34  | 245.24  | 12.74  | o |
| 1299 | 1 | 1   | 19  | 2 | 290.34  | 245.24  | 12.74  | o |
| 1300 | 2 | -2  | -19 | 2 | 159.17  | 136.95  | 6.37   | o |
| 1300 | 1 | 2   | 19  | 2 | 159.17  | 136.95  | 6.37   | o |
| 1301 | 2 | -3  | -19 | 2 | 164.99  | 146.51  | 9.55   | o |
| 1301 | 1 | 3   | 19  | 2 | 164.99  | 146.51  | 9.55   | o |
| 1302 | 2 | -4  | -19 | 2 | 970.60  | 799.42  | 31.85  | o |
| 1302 | 1 | 4   | 19  | 2 | 970.60  | 799.42  | 31.85  | o |
| 1303 | 2 | -5  | -19 | 2 | 469.48  | 503.22  | 22.29  | o |
| 1303 | 1 | 5   | 19  | 2 | 469.48  | 503.22  | 22.29  | o |
| 1304 | 2 | -6  | -19 | 2 | 190.40  | 187.91  | 9.55   | o |
| 1304 | 1 | 6   | 19  | 2 | 190.40  | 187.91  | 9.55   | o |
| 1305 | 2 | -7  | -19 | 2 | 117.24  | 133.77  | 6.37   | o |
| 1305 | 1 | 7   | 19  | 2 | 117.24  | 133.77  | 6.37   | o |
| 1306 | 2 | -8  | -19 | 2 | 35.30   | 28.66   | 3.18   | o |
| 1306 | 1 | 8   | 19  | 2 | 35.30   | 28.66   | 3.18   | o |
| 1307 | 2 | -9  | -19 | 2 | 89.34   | 85.99   | 6.37   | o |
| 1307 | 1 | 9   | 19  | 2 | 89.34   | 85.99   | 6.37   | o |
| 1308 | 2 | -10 | -19 | 2 | 95.07   | 105.10  | 9.55   | o |
| 1308 | 1 | 10  | 19  | 2 | 95.07   | 105.10  | 9.55   | o |

|      |   |     |     |   |         |         |        |   |
|------|---|-----|-----|---|---------|---------|--------|---|
| 1309 | 2 | -11 | -19 | 2 | 1.19    | 3.18    | 3.18   | < |
| 1309 | 1 | 11  | 19  | 2 | 1.19    | 3.18    | 3.18   | < |
| 1310 | 2 | -12 | -19 | 2 | 214.84  | 232.50  | 25.48  | o |
| 1310 | 1 | 12  | 19  | 2 | 214.84  | 232.50  | 25.48  | o |
| 1311 | 2 | 11  | -20 | 2 | 85.51   | 114.66  | 9.55   | o |
| 1311 | 1 | -11 | 20  | 2 | 85.51   | 114.66  | 9.55   | o |
| 1312 | 2 | 10  | -20 | 2 | 191.88  | 184.73  | 12.74  | o |
| 1312 | 1 | -10 | 20  | 2 | 191.88  | 184.73  | 12.74  | o |
| 1313 | 2 | 9   | -20 | 2 | 51.67   | 41.40   | 3.18   | o |
| 1313 | 1 | -9  | 20  | 2 | 51.67   | 41.40   | 3.18   | o |
| 1314 | 2 | 8   | -20 | 2 | 159.82  | 162.43  | 15.92  | o |
| 1314 | 1 | -8  | 20  | 2 | 159.82  | 162.43  | 15.92  | o |
| 1315 | 2 | 7   | -20 | 2 | 83.47   | 79.62   | 6.37   | o |
| 1315 | 1 | -7  | 20  | 2 | 83.47   | 79.62   | 6.37   | o |
| 1316 | 2 | 6   | -20 | 2 | 3024.48 | 2949.24 | 92.36  | o |
| 1316 | 1 | -6  | 20  | 2 | 3024.48 | 2949.24 | 92.36  | o |
| 1317 | 2 | 5   | -20 | 2 | 57.34   | 114.66  | 9.55   | o |
| 1317 | 1 | -5  | 20  | 2 | 57.34   | 114.66  | 9.55   | o |
| 1318 | 2 | 4   | -20 | 2 | 1326.37 | 1379.07 | 44.59  | o |
| 1318 | 1 | -4  | 20  | 2 | 1326.37 | 1379.07 | 44.59  | o |
| 1319 | 2 | 3   | -20 | 2 | 12.61   | 12.74   | 3.18   | o |
| 1319 | 1 | -3  | 20  | 2 | 12.61   | 12.74   | 3.18   | o |
| 1320 | 2 | 2   | -20 | 2 | 2042.16 | 2016.06 | 73.25  | o |
| 1320 | 1 | -2  | 20  | 2 | 2042.16 | 2016.06 | 73.25  | o |
| 1321 | 2 | 1   | -20 | 2 | 810.80  | 844.01  | 28.66  | o |
| 1321 | 1 | -1  | 20  | 2 | 810.80  | 844.01  | 28.66  | o |
| 1322 | 2 | 0   | -20 | 2 | 2207.91 | 2105.24 | 66.88  | o |
| 1322 | 1 | 0   | 20  | 2 | 2207.91 | 2105.24 | 66.88  | o |
| 1323 | 2 | -1  | -20 | 2 | 957.60  | 926.81  | 31.85  | o |
| 1323 | 1 | 1   | 20  | 2 | 957.60  | 926.81  | 31.85  | o |
| 1324 | 2 | -2  | -20 | 2 | 2202.89 | 1968.28 | 63.70  | o |
| 1324 | 1 | 2   | 20  | 2 | 2202.89 | 1968.28 | 63.70  | o |
| 1325 | 2 | -3  | -20 | 2 | 4.13    | 15.92   | 3.18   | o |
| 1325 | 1 | 3   | 20  | 2 | 4.13    | 15.92   | 3.18   | o |
| 1326 | 2 | -4  | -20 | 2 | 1038.95 | 1452.33 | 54.14  | o |
| 1326 | 1 | 4   | 20  | 2 | 1038.95 | 1452.33 | 54.14  | o |
| 1327 | 2 | -5  | -20 | 2 | 230.13  | 191.10  | 9.55   | o |
| 1327 | 1 | 5   | 20  | 2 | 230.13  | 191.10  | 9.55   | o |
| 1328 | 2 | -6  | -20 | 2 | 2283.86 | 2439.65 | 92.36  | o |
| 1328 | 1 | 6   | 20  | 2 | 2283.86 | 2439.65 | 92.36  | o |
| 1329 | 2 | -7  | -20 | 2 | 227.75  | 197.46  | 12.74  | o |
| 1329 | 1 | 7   | 20  | 2 | 227.75  | 197.46  | 12.74  | o |
| 1330 | 2 | -8  | -20 | 2 | 391.82  | 356.71  | 15.92  | o |
| 1330 | 1 | 8   | 20  | 2 | 391.82  | 356.71  | 15.92  | o |
| 1331 | 2 | -9  | -20 | 2 | 180.84  | 168.80  | 9.55   | o |
| 1331 | 1 | 9   | 20  | 2 | 180.84  | 168.80  | 9.55   | o |
| 1332 | 2 | -10 | -20 | 2 | 76.08   | 82.81   | 665.65 | < |
| 1332 | 1 | 10  | 20  | 2 | 76.08   | 82.81   | 665.65 | < |
| 1333 | 2 | -11 | -20 | 2 | 21.19   | 79.62   | 12.74  | o |
| 1333 | 1 | 11  | 20  | 2 | 21.19   | 79.62   | 12.74  | o |
| 1334 | 2 | 10  | -21 | 2 | 122.47  | 117.84  | 12.74  | o |
| 1334 | 1 | -10 | 21  | 2 | 122.47  | 117.84  | 12.74  | o |
| 1335 | 2 | 9   | -21 | 2 | 19.31   | 15.92   | 6.37   | < |
| 1335 | 1 | -9  | 21  | 2 | 19.31   | 15.92   | 6.37   | < |
| 1336 | 2 | 8   | -21 | 2 | 6.52    | 15.92   | 3.18   | o |
| 1336 | 1 | -8  | 21  | 2 | 6.52    | 15.92   | 3.18   | o |
| 1337 | 2 | 7   | -21 | 2 | 178.95  | 168.80  | 12.74  | o |
| 1337 | 1 | -7  | 21  | 2 | 178.95  | 168.80  | 12.74  | o |

|      |   |     |     |   |          |          |         |   |
|------|---|-----|-----|---|----------|----------|---------|---|
| 1338 | 2 | 6   | -21 | 2 | 664.13   | 624.25   | 22.29   | o |
| 1338 | 1 | -6  | 21  | 2 | 664.13   | 624.25   | 22.29   | o |
| 1339 | 2 | 5   | -21 | 2 | 48.15    | 82.81    | 9.55    | o |
| 1339 | 1 | -5  | 21  | 2 | 48.15    | 82.81    | 9.55    | o |
| 1340 | 2 | 4   | -21 | 2 | 1333.13  | 1637.05  | 57.33   | o |
| 1340 | 1 | -4  | 21  | 2 | 1333.13  | 1637.05  | 57.33   | o |
| 1341 | 2 | 3   | -21 | 2 | 37.33    | 66.88    | 6.37    | o |
| 1341 | 1 | -3  | 21  | 2 | 37.33    | 66.88    | 6.37    | o |
| 1342 | 2 | 2   | -21 | 2 | 13.82    | 19.11    | 3.18    | o |
| 1342 | 1 | -2  | 21  | 2 | 13.82    | 19.11    | 3.18    | o |
| 1343 | 2 | 1   | -21 | 2 | 68.92    | 70.07    | 6.37    | o |
| 1343 | 1 | -1  | 21  | 2 | 68.92    | 70.07    | 6.37    | o |
| 1344 | 2 | 0   | -21 | 2 | 67.67    | 85.99    | 6.37    | o |
| 1344 | 1 | 0   | 21  | 2 | 67.67    | 85.99    | 6.37    | o |
| 1345 | 2 | -1  | -21 | 2 | 89.63    | 70.07    | 6.37    | o |
| 1345 | 1 | 1   | 21  | 2 | 89.63    | 70.07    | 6.37    | o |
| 1346 | 2 | -2  | -21 | 2 | 4.13     | 19.11    | 3.18    | o |
| 1346 | 1 | 2   | 21  | 2 | 4.13     | 19.11    | 3.18    | o |
| 1347 | 2 | -3  | -21 | 2 | 127.85   | 95.55    | 6.37    | o |
| 1347 | 1 | 3   | 21  | 2 | 127.85   | 95.55    | 6.37    | o |
| 1348 | 2 | -4  | -21 | 2 | 1701.32  | 1844.07  | 60.51   | o |
| 1348 | 1 | 4   | 21  | 2 | 1701.32  | 1844.07  | 60.51   | o |
| 1349 | 2 | -5  | -21 | 2 | 125.63   | 124.21   | 9.55    | o |
| 1349 | 1 | 5   | 21  | 2 | 125.63   | 124.21   | 9.55    | o |
| 1350 | 2 | -6  | -21 | 2 | 446.81   | 458.63   | 19.11   | o |
| 1350 | 1 | 6   | 21  | 2 | 446.81   | 458.63   | 19.11   | o |
| 1351 | 2 | -7  | -21 | 2 | 64.53    | 95.55    | 6.37    | o |
| 1351 | 1 | 7   | 21  | 2 | 64.53    | 95.55    | 6.37    | o |
| 1352 | 2 | -8  | -21 | 2 | 11.92    | 19.11    | 3.18    | o |
| 1352 | 1 | 8   | 21  | 2 | 11.92    | 19.11    | 3.18    | o |
| 1353 | 2 | -9  | -21 | 2 | 29.73    | 25.48    | 3.18    | o |
| 1353 | 1 | 9   | 21  | 2 | 29.73    | 25.48    | 3.18    | o |
| 1354 | 2 | -10 | -21 | 2 | 118.13   | 149.69   | 19.11   | o |
| 1354 | 1 | 10  | 21  | 2 | 118.13   | 149.69   | 19.11   | o |
| 1355 | 2 | 9   | -22 | 2 | 600.48   | 579.66   | 44.59   | o |
| 1355 | 1 | -9  | 22  | 2 | 600.48   | 579.66   | 44.59   | o |
| 1356 | 2 | 8   | -22 | 2 | 4724.82  | 5013.08  | 181.54  | o |
| 1356 | 1 | -8  | 22  | 2 | 4724.82  | 5013.08  | 181.54  | o |
| 1357 | 2 | 7   | -22 | 2 | 85.26    | 79.62    | 6.37    | o |
| 1357 | 1 | -7  | 22  | 2 | 85.26    | 79.62    | 6.37    | o |
| 1358 | 2 | 6   | -22 | 2 | 6398.51  | 6997.28  | 216.57  | o |
| 1358 | 1 | -6  | 22  | 2 | 6398.51  | 6997.28  | 216.57  | o |
| 1359 | 2 | 4   | -22 | 2 | 29247.20 | 31995.80 | 1121.09 | o |
| 1359 | 1 | -4  | 22  | 2 | 29247.20 | 31995.80 | 1121.09 | o |
| 1360 | 2 | 3   | -22 | 2 | 875.03   | 879.04   | 31.85   | o |
| 1360 | 1 | -3  | 22  | 2 | 875.03   | 879.04   | 31.85   | o |
| 1361 | 2 | 2   | -22 | 2 | 3698.65  | 4067.15  | 127.40  | o |
| 1361 | 1 | -2  | 22  | 2 | 3698.65  | 4067.15  | 127.40  | o |
| 1362 | 2 | 1   | -22 | 2 | 113.76   | 108.29   | 6.37    | o |
| 1362 | 1 | -1  | 22  | 2 | 113.76   | 108.29   | 6.37    | o |
| 1363 | 2 | 0   | -22 | 2 | 944.37   | 974.59   | 31.85   | o |
| 1363 | 1 | 0   | 22  | 2 | 944.37   | 974.59   | 31.85   | o |
| 1364 | 2 | -1  | -22 | 2 | 116.64   | 111.47   | 6.37    | o |
| 1364 | 1 | 1   | 22  | 2 | 116.64   | 111.47   | 6.37    | o |
| 1365 | 2 | -2  | -22 | 2 | 3914.54  | 4264.62  | 133.77  | o |
| 1365 | 1 | 2   | 22  | 2 | 3914.54  | 4264.62  | 133.77  | o |
| 1366 | 2 | -3  | -22 | 2 | 917.76   | 923.63   | 31.85   | o |
| 1366 | 1 | 3   | 22  | 2 | 917.76   | 923.63   | 31.85   | o |

|      |   |    |     |   |          |          |        |   |
|------|---|----|-----|---|----------|----------|--------|---|
| 1367 | 2 | -4 | -22 | 2 | 27591.50 | 30750.50 | 933.18 | o |
| 1367 | 1 | 4  | 22  | 2 | 27591.50 | 30750.50 | 933.18 | o |
| 1368 | 2 | -5 | -22 | 2 | 60.93    | 79.62    | 6.37   | o |
| 1368 | 1 | 5  | 22  | 2 | 60.93    | 79.62    | 6.37   | o |
| 1369 | 2 | -6 | -22 | 2 | 7010.25  | 6949.51  | 213.39 | o |
| 1369 | 1 | 6  | 22  | 2 | 7010.25  | 6949.51  | 213.39 | o |
| 1370 | 2 | -7 | -22 | 2 | 73.13    | 79.62    | 6.37   | o |
| 1370 | 1 | 7  | 22  | 2 | 73.13    | 79.62    | 6.37   | o |
| 1371 | 2 | -8 | -22 | 2 | 4437.47  | 4678.66  | 146.51 | o |
| 1371 | 1 | 8  | 22  | 2 | 4437.47  | 4678.66  | 146.51 | o |
| 1372 | 2 | -9 | -22 | 2 | 859.94   | 898.15   | 66.88  | o |
| 1372 | 1 | 9  | 22  | 2 | 859.94   | 898.15   | 66.88  | o |
| 1373 | 2 | 8  | -23 | 2 | 669.81   | 649.72   | 35.03  | o |
| 1373 | 1 | -8 | 23  | 2 | 669.81   | 649.72   | 35.03  | o |
| 1374 | 2 | 7  | -23 | 2 | 111.51   | 111.47   | 6.37   | o |
| 1374 | 1 | -7 | 23  | 2 | 111.51   | 111.47   | 6.37   | o |
| 1375 | 2 | 6  | -23 | 2 | 235.57   | 261.16   | 12.74  | o |
| 1375 | 1 | -6 | 23  | 2 | 235.57   | 261.16   | 12.74  | o |
| 1376 | 2 | 5  | -23 | 2 | 81.19    | 130.58   | 9.55   | o |
| 1376 | 1 | -5 | 23  | 2 | 81.19    | 130.58   | 9.55   | o |
| 1377 | 2 | 4  | -23 | 2 | 328.32   | 299.38   | 15.92  | o |
| 1377 | 1 | -4 | 23  | 2 | 328.32   | 299.38   | 15.92  | o |
| 1378 | 2 | 3  | -23 | 2 | 564.07   | 436.33   | 19.11  | o |
| 1378 | 1 | -3 | 23  | 2 | 564.07   | 436.33   | 19.11  | o |
| 1379 | 2 | 1  | -23 | 2 | 488.87   | 401.30   | 19.11  | o |
| 1379 | 1 | -1 | 23  | 2 | 488.87   | 401.30   | 19.11  | o |
| 1380 | 2 | 0  | -23 | 2 | 119.53   | 171.99   | 9.55   | o |
| 1380 | 1 | 0  | 23  | 2 | 119.53   | 171.99   | 9.55   | o |
| 1381 | 2 | -1 | -23 | 2 | 228.27   | 293.01   | 15.92  | o |
| 1381 | 1 | 1  | 23  | 2 | 228.27   | 293.01   | 15.92  | o |
| 1382 | 2 | -2 | -23 | 2 | 141.68   | 136.95   | 9.55   | o |
| 1382 | 1 | 2  | 23  | 2 | 141.68   | 136.95   | 9.55   | o |
| 1383 | 2 | -3 | -23 | 2 | 314.70   | 410.86   | 19.11  | o |
| 1383 | 1 | 3  | 23  | 2 | 314.70   | 410.86   | 19.11  | o |
| 1384 | 2 | -4 | -23 | 2 | 241.75   | 280.27   | 15.92  | o |
| 1384 | 1 | 4  | 23  | 2 | 241.75   | 280.27   | 15.92  | o |
| 1385 | 2 | -5 | -23 | 2 | 276.07   | 232.50   | 12.74  | o |
| 1385 | 1 | 5  | 23  | 2 | 276.07   | 232.50   | 12.74  | o |
| 1386 | 2 | -6 | -23 | 2 | 144.29   | 197.46   | 9.55   | o |
| 1386 | 1 | 6  | 23  | 2 | 144.29   | 197.46   | 9.55   | o |
| 1387 | 2 | -7 | -23 | 2 | 82.18    | 92.36    | 6.37   | o |
| 1387 | 1 | 7  | 23  | 2 | 82.18    | 92.36    | 6.37   | o |
| 1388 | 2 | -8 | -23 | 2 | 593.68   | 570.10   | 25.48  | o |
| 1388 | 1 | 8  | 23  | 2 | 593.68   | 570.10   | 25.48  | o |
| 1389 | 2 | 7  | -24 | 2 | 38.29    | 50.96    | 6.37   | o |
| 1389 | 1 | -7 | 24  | 2 | 38.29    | 50.96    | 6.37   | o |
| 1390 | 2 | 6  | -24 | 2 | 34.91    | 66.88    | 6.37   | o |
| 1390 | 1 | -6 | 24  | 2 | 34.91    | 66.88    | 6.37   | o |
| 1391 | 2 | 5  | -24 | 2 | 535.27   | 621.06   | 25.48  | o |
| 1391 | 1 | -5 | 24  | 2 | 535.27   | 621.06   | 25.48  | o |
| 1392 | 2 | 3  | -24 | 2 | 808.80   | 764.38   | 31.85  | o |
| 1392 | 1 | -3 | 24  | 2 | 808.80   | 764.38   | 31.85  | o |
| 1393 | 2 | 1  | -24 | 2 | 17.90    | 47.77    | 6.37   | o |
| 1393 | 1 | -1 | 24  | 2 | 17.90    | 47.77    | 6.37   | o |
| 1394 | 2 | 0  | -24 | 2 | 7354.49  | 7385.85  | 226.13 | o |
| 1394 | 1 | 0  | 24  | 2 | 7354.49  | 7385.85  | 226.13 | o |
| 1395 | 2 | -1 | -24 | 2 | 70.33    | 60.51    | 6.37   | o |
| 1395 | 1 | 1  | 24  | 2 | 70.33    | 60.51    | 6.37   | o |

|      |   |    |     |   |         |         |        |   |
|------|---|----|-----|---|---------|---------|--------|---|
| 1396 | 2 | -2 | -24 | 2 | 533.15  | 621.06  | 28.66  | o |
| 1396 | 1 | 2  | 24  | 2 | 533.15  | 621.06  | 28.66  | o |
| 1397 | 2 | -3 | -24 | 2 | 1040.89 | 894.97  | 38.22  | o |
| 1397 | 1 | 3  | 24  | 2 | 1040.89 | 894.97  | 38.22  | o |
| 1398 | 2 | -4 | -24 | 2 | 32.91   | 60.51   | 6.37   | o |
| 1398 | 1 | 4  | 24  | 2 | 32.91   | 60.51   | 6.37   | o |
| 1399 | 2 | -5 | -24 | 2 | 1009.26 | 844.01  | 28.66  | o |
| 1399 | 1 | 5  | 24  | 2 | 1009.26 | 844.01  | 28.66  | o |
| 1400 | 2 | -6 | -24 | 2 | 29.26   | 38.22   | 6.37   | o |
| 1400 | 1 | 6  | 24  | 2 | 29.26   | 38.22   | 6.37   | o |
| 1401 | 2 | -7 | -24 | 2 | 144.72  | 127.40  | 9.55   | o |
| 1401 | 1 | 7  | 24  | 2 | 144.72  | 127.40  | 9.55   | o |
| 1402 | 2 | 7  | -25 | 2 | 241.31  | 229.32  | 19.11  | o |
| 1402 | 1 | -7 | 25  | 2 | 241.31  | 229.32  | 19.11  | o |
| 1403 | 2 | 6  | -25 | 2 | 180.89  | 178.36  | 15.92  | o |
| 1403 | 1 | -6 | 25  | 2 | 180.89  | 178.36  | 15.92  | o |
| 1404 | 2 | 5  | -25 | 2 | 57.83   | 76.44   | 9.55   | o |
| 1404 | 1 | -5 | 25  | 2 | 57.83   | 76.44   | 9.55   | o |
| 1405 | 2 | 4  | -25 | 2 | 206.89  | 222.95  | 12.74  | o |
| 1405 | 1 | -4 | 25  | 2 | 206.89  | 222.95  | 12.74  | o |
| 1406 | 2 | 3  | -25 | 2 | 75.94   | 57.33   | 6.37   | o |
| 1406 | 1 | -3 | 25  | 2 | 75.94   | 57.33   | 6.37   | o |
| 1407 | 2 | 2  | -25 | 2 | 234.34  | 299.38  | 15.92  | o |
| 1407 | 1 | -2 | 25  | 2 | 234.34  | 299.38  | 15.92  | o |
| 1408 | 2 | 1  | -25 | 2 | 29.44   | 44.59   | 6.37   | o |
| 1408 | 1 | -1 | 25  | 2 | 29.44   | 44.59   | 6.37   | o |
| 1409 | 2 | 0  | -25 | 2 | 0.05    | 3.18    | 3.18   | < |
| 1409 | 1 | 0  | 25  | 2 | 0.05    | 3.18    | 3.18   | < |
| 1410 | 2 | -1 | -25 | 2 | 37.02   | 47.77   | 9.55   | o |
| 1410 | 1 | 1  | 25  | 2 | 37.02   | 47.77   | 9.55   | o |
| 1411 | 2 | -2 | -25 | 2 | 362.15  | 347.16  | 15.92  | o |
| 1411 | 1 | 2  | 25  | 2 | 362.15  | 347.16  | 15.92  | o |
| 1412 | 2 | -3 | -25 | 2 | 19.45   | 44.59   | 6.37   | o |
| 1412 | 1 | 3  | 25  | 2 | 19.45   | 44.59   | 6.37   | o |
| 1413 | 2 | -4 | -25 | 2 | 304.64  | 261.16  | 12.74  | o |
| 1413 | 1 | 4  | 25  | 2 | 304.64  | 261.16  | 12.74  | o |
| 1414 | 2 | -5 | -25 | 2 | 17.36   | 28.66   | 6.37   | o |
| 1414 | 1 | 5  | 25  | 2 | 17.36   | 28.66   | 6.37   | o |
| 1415 | 2 | -6 | -25 | 2 | 357.89  | 305.75  | 19.11  | o |
| 1415 | 1 | 6  | 25  | 2 | 357.89  | 305.75  | 19.11  | o |
| 1416 | 2 | -7 | -25 | 2 | 244.60  | 229.32  | 19.11  | o |
| 1416 | 1 | 7  | 25  | 2 | 244.60  | 229.32  | 19.11  | o |
| 1417 | 2 | 6  | -26 | 2 | 47.66   | 54.14   | 9.55   | o |
| 1417 | 1 | -6 | 26  | 2 | 47.66   | 54.14   | 9.55   | o |
| 1418 | 2 | 5  | -26 | 2 | 148.03  | 136.95  | 12.74  | o |
| 1418 | 1 | -5 | 26  | 2 | 148.03  | 136.95  | 12.74  | o |
| 1419 | 2 | 4  | -26 | 2 | 2679.52 | 2624.38 | 98.73  | o |
| 1419 | 1 | -4 | 26  | 2 | 2679.52 | 2624.38 | 98.73  | o |
| 1420 | 2 | 3  | -26 | 2 | 597.07  | 531.88  | 25.48  | o |
| 1420 | 1 | -3 | 26  | 2 | 597.07  | 531.88  | 25.48  | o |
| 1421 | 2 | 2  | -26 | 2 | 5798.34 | 6223.35 | 191.10 | o |
| 1421 | 1 | -2 | 26  | 2 | 5798.34 | 6223.35 | 191.10 | o |
| 1422 | 2 | 1  | -26 | 2 | 143.07  | 133.77  | 9.55   | o |
| 1422 | 1 | -1 | 26  | 2 | 143.07  | 133.77  | 9.55   | o |
| 1423 | 2 | 0  | -26 | 2 | 3016.77 | 2888.73 | 92.36  | o |
| 1423 | 1 | 0  | 26  | 2 | 3016.77 | 2888.73 | 92.36  | o |
| 1424 | 2 | -1 | -26 | 2 | 99.07   | 117.84  | 6.37   | o |
| 1424 | 1 | 1  | 26  | 2 | 99.07   | 117.84  | 6.37   | o |

|      |   |    |     |   |          |          |        |   |
|------|---|----|-----|---|----------|----------|--------|---|
| 1425 | 2 | -2 | -26 | 2 | 5743.24  | 6341.19  | 197.46 | o |
| 1425 | 1 | 2  | 26  | 2 | 5743.24  | 6341.19  | 197.46 | o |
| 1426 | 2 | -3 | -26 | 2 | 641.40   | 538.25   | 31.85  | o |
| 1426 | 1 | 3  | 26  | 2 | 641.40   | 538.25   | 31.85  | o |
| 1427 | 2 | -4 | -26 | 2 | 2876.07  | 2786.81  | 101.92 | o |
| 1427 | 1 | 4  | 26  | 2 | 2876.07  | 2786.81  | 101.92 | o |
| 1428 | 2 | -5 | -26 | 2 | 77.63    | 95.55    | 9.55   | o |
| 1428 | 1 | 5  | 26  | 2 | 77.63    | 95.55    | 9.55   | o |
| 1429 | 2 | -6 | -26 | 2 | 38.73    | 44.59    | 6.37   | o |
| 1429 | 1 | 6  | 26  | 2 | 38.73    | 44.59    | 6.37   | o |
| 1430 | 2 | -7 | -26 | 2 | 321.88   | 207.02   | 25.48  | o |
| 1430 | 1 | 7  | 26  | 2 | 321.88   | 207.02   | 25.48  | o |
| 1431 | 2 | 5  | -27 | 2 | 17.08    | 15.92    | 6.37   | < |
| 1431 | 1 | -5 | 27  | 2 | 17.08    | 15.92    | 6.37   | < |
| 1432 | 2 | 4  | -27 | 2 | 333.52   | 286.64   | 19.11  | o |
| 1432 | 1 | -4 | 27  | 2 | 333.52   | 286.64   | 19.11  | o |
| 1433 | 2 | 3  | -27 | 2 | 43.50    | 44.59    | 6.37   | o |
| 1433 | 1 | -3 | 27  | 2 | 43.50    | 44.59    | 6.37   | o |
| 1434 | 2 | 2  | -27 | 2 | 1273.72  | 1143.39  | 50.96  | o |
| 1434 | 1 | -2 | 27  | 2 | 1273.72  | 1143.39  | 50.96  | o |
| 1435 | 2 | 1  | -27 | 2 | 290.82   | 261.16   | 15.92  | o |
| 1435 | 1 | -1 | 27  | 2 | 290.82   | 261.16   | 15.92  | o |
| 1436 | 2 | -1 | -27 | 2 | 166.27   | 194.28   | 12.74  | o |
| 1436 | 1 | 1  | 27  | 2 | 166.27   | 194.28   | 12.74  | o |
| 1437 | 2 | -2 | -27 | 2 | 1450.85  | 1350.41  | 54.14  | o |
| 1437 | 1 | 2  | 27  | 2 | 1450.85  | 1350.41  | 54.14  | o |
| 1438 | 2 | -3 | -27 | 2 | 44.50    | 54.14    | 6.37   | o |
| 1438 | 1 | 3  | 27  | 2 | 44.50    | 54.14    | 6.37   | o |
| 1439 | 2 | -4 | -27 | 2 | 147.93   | 175.17   | 12.74  | o |
| 1439 | 1 | 4  | 27  | 2 | 147.93   | 175.17   | 12.74  | o |
| 1440 | 2 | -5 | -27 | 2 | 7.71     | 3.18     | 3.18   | < |
| 1440 | 1 | 5  | 27  | 2 | 7.71     | 3.18     | 3.18   | < |
| 1441 | 2 | -6 | -27 | 2 | 36.94    | 85.99    | 9.55   | o |
| 1441 | 1 | 6  | 27  | 2 | 36.94    | 85.99    | 9.55   | o |
| 1442 | 2 | 5  | -28 | 2 | 34.62    | 63.70    | 9.55   | o |
| 1442 | 1 | -5 | 28  | 2 | 34.62    | 63.70    | 9.55   | o |
| 1443 | 2 | 4  | -28 | 2 | 2192.11  | 1920.51  | 105.10 | o |
| 1443 | 1 | -4 | 28  | 2 | 2192.11  | 1920.51  | 105.10 | o |
| 1444 | 2 | 3  | -28 | 2 | 567.74   | 560.55   | 44.59  | o |
| 1444 | 1 | -3 | 28  | 2 | 567.74   | 560.55   | 44.59  | o |
| 1445 | 2 | 2  | -28 | 2 | 206.95   | 184.73   | 22.29  | o |
| 1445 | 1 | -2 | 28  | 2 | 206.95   | 184.73   | 22.29  | o |
| 1446 | 2 | 1  | -28 | 2 | 1493.22  | 1226.20  | 85.99  | o |
| 1446 | 1 | -1 | 28  | 2 | 1493.22  | 1226.20  | 85.99  | o |
| 1447 | 2 | -2 | -28 | 2 | 164.76   | 159.25   | 25.48  | o |
| 1447 | 1 | 2  | 28  | 2 | 164.76   | 159.25   | 25.48  | o |
| 1448 | 2 | -3 | -28 | 2 | 462.65   | 410.86   | 35.03  | o |
| 1448 | 1 | 3  | 28  | 2 | 462.65   | 410.86   | 35.03  | o |
| 1449 | 2 | -4 | -28 | 2 | 2766.04  | 2512.91  | 162.43 | o |
| 1449 | 1 | 4  | 28  | 2 | 2766.04  | 2512.91  | 162.43 | o |
| 1450 | 2 | -5 | -28 | 2 | 136.79   | 133.77   | 19.11  | o |
| 1450 | 1 | 5  | 28  | 2 | 136.79   | 133.77   | 19.11  | o |
| 1451 | 2 | -6 | -28 | 2 | 8304.44  | 5646.88  | 500.03 | o |
| 1451 | 1 | 6  | 28  | 2 | 8304.44  | 5646.88  | 500.03 | o |
| 1452 | 2 | 8  | -1  | 3 | 17792.90 | 15099.70 | 643.35 | o |
| 1452 | 1 | -8 | 1   | 3 | 17792.90 | 15099.70 | 643.35 | o |
| 1453 | 2 | 7  | -1  | 3 | 5375.15  | 4863.38  | 156.06 | o |
| 1453 | 1 | -7 | 1   | 3 | 5375.15  | 4863.38  | 156.06 | o |

|      |   |     |    |   |          |          |        |   |
|------|---|-----|----|---|----------|----------|--------|---|
| 1454 | 2 | 5   | -1 | 3 | 22968.20 | 18666.90 | 560.55 | o |
| 1454 | 1 | -5  | 1  | 3 | 22968.20 | 18666.90 | 560.55 | o |
| 1455 | 2 | 4   | -1 | 3 | 10514.00 | 10860.60 | 328.05 | o |
| 1455 | 1 | -4  | 1  | 3 | 10514.00 | 10860.60 | 328.05 | o |
| 1456 | 2 | 3   | -1 | 3 | 427.02   | 363.08   | 12.74  | o |
| 1456 | 1 | -3  | 1  | 3 | 427.02   | 363.08   | 12.74  | o |
| 1457 | 2 | 2   | -1 | 3 | 1632.76  | 1742.16  | 54.14  | o |
| 1457 | 1 | -2  | 1  | 3 | 1632.76  | 1742.16  | 54.14  | o |
| 1458 | 2 | -2  | -1 | 3 | 981.67   | 958.66   | 31.85  | o |
| 1458 | 1 | 2   | 1  | 3 | 981.67   | 958.66   | 31.85  | o |
| 1459 | 2 | -4  | -1 | 3 | 9410.08  | 9924.23  | 299.38 | o |
| 1459 | 1 | 4   | 1  | 3 | 9410.08  | 9924.23  | 299.38 | o |
| 1460 | 2 | -5  | -1 | 3 | 27491.30 | 25218.30 | 758.01 | o |
| 1460 | 1 | 5   | 1  | 3 | 27491.30 | 25218.30 | 758.01 | o |
| 1461 | 2 | -8  | -1 | 3 | 18441.40 | 15778.10 | 477.74 | o |
| 1461 | 1 | 8   | 1  | 3 | 18441.40 | 15778.10 | 477.74 | o |
| 1462 | 2 | -9  | -1 | 3 | 71.67    | 70.07    | 50.96  | < |
| 1462 | 1 | 9   | 1  | 3 | 71.67    | 70.07    | 50.96  | < |
| 1463 | 2 | -10 | -1 | 3 | 309.03   | 283.46   | 9.55   | o |
| 1463 | 1 | 10  | 1  | 3 | 309.03   | 283.46   | 9.55   | o |
| 1464 | 2 | -11 | -1 | 3 | 1616.06  | 1535.13  | 57.33  | o |
| 1464 | 1 | 11  | 1  | 3 | 1616.06  | 1535.13  | 57.33  | o |
| 1465 | 2 | -12 | -1 | 3 | 81.64    | 85.99    | 6.37   | o |
| 1465 | 1 | 12  | 1  | 3 | 81.64    | 85.99    | 6.37   | o |
| 1466 | 2 | 10  | -2 | 3 | 384.37   | 248.42   | 22.29  | o |
| 1466 | 1 | -10 | 2  | 3 | 384.37   | 248.42   | 22.29  | o |
| 1467 | 2 | 9   | -2 | 3 | 291.92   | 257.98   | 19.11  | o |
| 1467 | 1 | -9  | 2  | 3 | 291.92   | 257.98   | 19.11  | o |
| 1468 | 2 | 8   | -2 | 3 | 675.53   | 579.66   | 25.48  | o |
| 1468 | 1 | -8  | 2  | 3 | 675.53   | 579.66   | 25.48  | o |
| 1469 | 2 | 7   | -2 | 3 | 142.90   | 149.69   | 6.37   | o |
| 1469 | 1 | -7  | 2  | 3 | 142.90   | 149.69   | 6.37   | o |
| 1470 | 2 | 6   | -2 | 3 | 8.18     | 6.37     | 3.18   | < |
| 1470 | 1 | -6  | 2  | 3 | 8.18     | 6.37     | 3.18   | < |
| 1471 | 2 | 5   | -2 | 3 | 663.30   | 621.06   | 19.11  | o |
| 1471 | 1 | -5  | 2  | 3 | 663.30   | 621.06   | 19.11  | o |
| 1472 | 2 | 4   | -2 | 3 | 67.26    | 47.77    | 3.18   | o |
| 1472 | 1 | -4  | 2  | 3 | 67.26    | 47.77    | 3.18   | o |
| 1473 | 2 | 2   | -2 | 3 | 41.68    | 15.92    | 3.18   | o |
| 1473 | 1 | -2  | 2  | 3 | 41.68    | 15.92    | 3.18   | o |
| 1474 | 2 | 0   | -2 | 3 | 770.20   | 961.85   | 38.22  | o |
| 1474 | 1 | 0   | 2  | 3 | 770.20   | 961.85   | 38.22  | o |
| 1475 | 2 | -1  | -2 | 3 | 730.60   | 592.40   | 19.11  | o |
| 1475 | 1 | 1   | 2  | 3 | 730.60   | 592.40   | 19.11  | o |
| 1476 | 2 | -2  | -2 | 3 | 101.01   | 85.99    | 3.18   | o |
| 1476 | 1 | 2   | 2  | 3 | 101.01   | 85.99    | 3.18   | o |
| 1477 | 2 | -3  | -2 | 3 | 459.15   | 436.33   | 15.92  | o |
| 1477 | 1 | 3   | 2  | 3 | 459.15   | 436.33   | 15.92  | o |
| 1478 | 2 | -4  | -2 | 3 | 259.85   | 261.16   | 9.55   | o |
| 1478 | 1 | 4   | 2  | 3 | 259.85   | 261.16   | 9.55   | o |
| 1479 | 2 | -5  | -2 | 3 | 160.76   | 82.81    | 89.18  | < |
| 1479 | 1 | 5   | 2  | 3 | 160.76   | 82.81    | 89.18  | < |
| 1480 | 2 | -6  | -2 | 3 | 21.75    | 22.29    | 3.18   | o |
| 1480 | 1 | 6   | 2  | 3 | 21.75    | 22.29    | 3.18   | o |
| 1481 | 2 | -7  | -2 | 3 | 83.84    | 63.70    | 12.74  | o |
| 1481 | 1 | 7   | 2  | 3 | 83.84    | 63.70    | 12.74  | o |
| 1482 | 2 | -8  | -2 | 3 | 347.94   | 200.65   | 149.69 | < |
| 1482 | 1 | 8   | 2  | 3 | 347.94   | 200.65   | 149.69 | < |

|      |   |     |    |   |          |          |        |   |
|------|---|-----|----|---|----------|----------|--------|---|
| 1483 | 2 | -9  | -2 | 3 | 162.37   | 121.03   | 6.37   | o |
| 1483 | 1 | 9   | 2  | 3 | 162.37   | 121.03   | 6.37   | o |
| 1484 | 2 | -10 | -2 | 3 | 143.69   | 121.03   | 6.37   | o |
| 1484 | 1 | 10  | 2  | 3 | 143.69   | 121.03   | 6.37   | o |
| 1485 | 2 | -11 | -2 | 3 | 829.87   | 847.19   | 44.59  | o |
| 1485 | 1 | 11  | 2  | 3 | 829.87   | 847.19   | 44.59  | o |
| 1486 | 2 | -12 | -2 | 3 | 63.95    | 73.25    | 6.37   | o |
| 1486 | 1 | 12  | 2  | 3 | 63.95    | 73.25    | 6.37   | o |
| 1487 | 2 | -13 | -2 | 3 | 29.94    | 41.40    | 6.37   | o |
| 1487 | 1 | 13  | 2  | 3 | 29.94    | 41.40    | 6.37   | o |
| 1488 | 2 | 10  | -3 | 3 | 172.97   | 146.51   | 9.55   | o |
| 1488 | 1 | -10 | 3  | 3 | 172.97   | 146.51   | 9.55   | o |
| 1489 | 2 | 9   | -3 | 3 | 1756.66  | 1344.04  | 168.80 | o |
| 1489 | 1 | -9  | 3  | 3 | 1756.66  | 1344.04  | 168.80 | o |
| 1490 | 2 | 8   | -3 | 3 | 855.57   | 793.05   | 35.03  | o |
| 1490 | 1 | -8  | 3  | 3 | 855.57   | 793.05   | 35.03  | o |
| 1491 | 2 | 7   | -3 | 3 | 805.46   | 815.34   | 38.22  | o |
| 1491 | 1 | -7  | 3  | 3 | 805.46   | 815.34   | 38.22  | o |
| 1492 | 2 | 6   | -3 | 3 | 1295.48  | 1439.59  | 47.77  | o |
| 1492 | 1 | -6  | 3  | 3 | 1295.48  | 1439.59  | 47.77  | o |
| 1493 | 2 | 4   | -3 | 3 | 558.94   | 589.21   | 28.66  | o |
| 1493 | 1 | -4  | 3  | 3 | 558.94   | 589.21   | 28.66  | o |
| 1494 | 2 | 3   | -3 | 3 | 17325.80 | 15036.00 | 452.26 | o |
| 1494 | 1 | -3  | 3  | 3 | 17325.80 | 15036.00 | 452.26 | o |
| 1495 | 2 | 2   | -3 | 3 | 7989.38  | 6825.30  | 207.02 | o |
| 1495 | 1 | -2  | 3  | 3 | 7989.38  | 6825.30  | 207.02 | o |
| 1496 | 2 | 1   | -3 | 3 | 6839.93  | 5841.16  | 178.36 | o |
| 1496 | 1 | -1  | 3  | 3 | 6839.93  | 5841.16  | 178.36 | o |
| 1497 | 2 | -1  | -3 | 3 | 3673.05  | 3726.36  | 117.84 | o |
| 1497 | 1 | 1   | 3  | 3 | 3673.05  | 3726.36  | 117.84 | o |
| 1498 | 2 | -2  | -3 | 3 | 5110.40  | 4328.32  | 133.77 | o |
| 1498 | 1 | 2   | 3  | 3 | 5110.40  | 4328.32  | 133.77 | o |
| 1499 | 2 | -3  | -3 | 3 | 23711.30 | 20431.30 | 617.88 | o |
| 1499 | 1 | 3   | 3  | 3 | 23711.30 | 20431.30 | 617.88 | o |
| 1500 | 2 | -4  | -3 | 3 | 1228.72  | 1442.77  | 44.59  | o |
| 1500 | 1 | 4   | 3  | 3 | 1228.72  | 1442.77  | 44.59  | o |
| 1501 | 2 | -5  | -3 | 3 | 2817.46  | 2334.55  | 73.25  | o |
| 1501 | 1 | 5   | 3  | 3 | 2817.46  | 2334.55  | 73.25  | o |
| 1502 | 2 | -6  | -3 | 3 | 813.01   | 754.83   | 28.66  | o |
| 1502 | 1 | 6   | 3  | 3 | 813.01   | 754.83   | 28.66  | o |
| 1503 | 2 | -7  | -3 | 3 | 537.44   | 503.22   | 22.29  | o |
| 1503 | 1 | 7   | 3  | 3 | 537.44   | 503.22   | 22.29  | o |
| 1504 | 2 | -8  | -3 | 3 | 939.77   | 875.85   | 70.07  | o |
| 1504 | 1 | 8   | 3  | 3 | 939.77   | 875.85   | 70.07  | o |
| 1505 | 2 | -10 | -3 | 3 | 190.05   | 181.54   | 6.37   | o |
| 1505 | 1 | 10  | 3  | 3 | 190.05   | 181.54   | 6.37   | o |
| 1506 | 2 | -11 | -3 | 3 | 2808.88  | 3047.98  | 133.77 | o |
| 1506 | 1 | 11  | 3  | 3 | 2808.88  | 3047.98  | 133.77 | o |
| 1507 | 2 | -13 | -3 | 3 | 19.85    | 12.74    | 3.18   | o |
| 1507 | 1 | 13  | 3  | 3 | 19.85    | 12.74    | 3.18   | o |
| 1508 | 2 | 11  | -4 | 3 | 46.32    | 50.96    | 6.37   | o |
| 1508 | 1 | -11 | 4  | 3 | 46.32    | 50.96    | 6.37   | o |
| 1509 | 2 | 10  | -4 | 3 | 159.68   | 117.84   | 15.92  | o |
| 1509 | 1 | -10 | 4  | 3 | 159.68   | 117.84   | 15.92  | o |
| 1510 | 2 | 9   | -4 | 3 | 40.72    | 25.48    | 73.25  | < |
| 1510 | 1 | -9  | 4  | 3 | 40.72    | 25.48    | 73.25  | < |
| 1511 | 2 | 8   | -4 | 3 | 111.68   | 76.44    | 6.37   | o |
| 1511 | 1 | -8  | 4  | 3 | 111.68   | 76.44    | 6.37   | o |



|      |   |     |    |   |         |         |        |   |
|------|---|-----|----|---|---------|---------|--------|---|
| 1512 | 2 | 7   | -4 | 3 | 605.31  | 493.66  | 22.29  | o |
| 1512 | 1 | -7  | 4  | 3 | 605.31  | 493.66  | 22.29  | o |
| 1513 | 2 | 6   | -4 | 3 | 317.27  | 261.16  | 12.74  | o |
| 1513 | 1 | -6  | 4  | 3 | 317.27  | 261.16  | 12.74  | o |
| 1514 | 2 | 5   | -4 | 3 | 10.22   | 22.29   | 3.18   | o |
| 1514 | 1 | -5  | 4  | 3 | 10.22   | 22.29   | 3.18   | o |
| 1515 | 2 | 4   | -4 | 3 | 1341.78 | 1089.25 | 35.03  | o |
| 1515 | 1 | -4  | 4  | 3 | 1341.78 | 1089.25 | 35.03  | o |
| 1516 | 2 | 3   | -4 | 3 | 3.08    | -9.55   | 3.18   | < |
| 1516 | 1 | -3  | 4  | 3 | 3.08    | -9.55   | 3.18   | < |
| 1517 | 2 | 2   | -4 | 3 | 145.74  | 156.06  | 6.37   | o |
| 1517 | 1 | -2  | 4  | 3 | 145.74  | 156.06  | 6.37   | o |
| 1518 | 2 | 1   | -4 | 3 | 13.33   | 28.66   | 3.18   | o |
| 1518 | 1 | -1  | 4  | 3 | 13.33   | 28.66   | 3.18   | o |
| 1519 | 2 | 0   | -4 | 3 | 30.94   | -22.29  | 3.18   | < |
| 1519 | 1 | 0   | 4  | 3 | 30.94   | -22.29  | 3.18   | < |
| 1520 | 2 | -1  | -4 | 3 | 4.51    | 15.92   | 3.18   | o |
| 1520 | 1 | 1   | 4  | 3 | 4.51    | 15.92   | 3.18   | o |
| 1521 | 2 | -2  | -4 | 3 | 289.37  | 238.87  | 9.55   | o |
| 1521 | 1 | 2   | 4  | 3 | 289.37  | 238.87  | 9.55   | o |
| 1522 | 2 | -3  | -4 | 3 | 12.17   | 0.00    | 3.18   | < |
| 1522 | 1 | 3   | 4  | 3 | 12.17   | 0.00    | 3.18   | < |
| 1523 | 2 | -4  | -4 | 3 | 1404.86 | 1226.20 | 38.22  | o |
| 1523 | 1 | 4   | 4  | 3 | 1404.86 | 1226.20 | 38.22  | o |
| 1524 | 2 | -5  | -4 | 3 | 27.73   | 31.85   | 3.18   | o |
| 1524 | 1 | 5   | 4  | 3 | 27.73   | 31.85   | 3.18   | o |
| 1525 | 2 | -6  | -4 | 3 | 78.27   | 22.29   | 9.55   | < |
| 1525 | 1 | 6   | 4  | 3 | 78.27   | 22.29   | 9.55   | < |
| 1526 | 2 | -7  | -4 | 3 | 164.21  | 73.25   | 35.03  | < |
| 1526 | 1 | 7   | 4  | 3 | 164.21  | 73.25   | 35.03  | < |
| 1527 | 2 | -8  | -4 | 3 | 191.98  | 165.62  | 6.37   | o |
| 1527 | 1 | 8   | 4  | 3 | 191.98  | 165.62  | 6.37   | o |
| 1528 | 2 | -9  | -4 | 3 | 102.14  | 98.73   | 6.37   | o |
| 1528 | 1 | 9   | 4  | 3 | 102.14  | 98.73   | 6.37   | o |
| 1529 | 2 | -10 | -4 | 3 | 172.93  | 143.32  | 9.55   | o |
| 1529 | 1 | 10  | 4  | 3 | 172.93  | 143.32  | 9.55   | o |
| 1530 | 2 | -11 | -4 | 3 | 13.02   | 6.37    | 3.18   | < |
| 1530 | 1 | 11  | 4  | 3 | 13.02   | 6.37    | 3.18   | < |
| 1531 | 2 | -12 | -4 | 3 | 15.31   | 28.66   | 6.37   | o |
| 1531 | 1 | 12  | 4  | 3 | 15.31   | 28.66   | 6.37   | o |
| 1532 | 2 | -13 | -4 | 3 | 133.93  | 156.06  | 12.74  | o |
| 1532 | 1 | 13  | 4  | 3 | 133.93  | 156.06  | 12.74  | o |
| 1533 | 2 | 12  | -5 | 3 | 78.31   | 79.62   | 6.37   | o |
| 1533 | 1 | -12 | 5  | 3 | 78.31   | 79.62   | 6.37   | o |
| 1534 | 2 | 11  | -5 | 3 | 2214.87 | 2149.83 | 114.66 | o |
| 1534 | 1 | -11 | 5  | 3 | 2214.87 | 2149.83 | 114.66 | o |
| 1535 | 2 | 10  | -5 | 3 | 1239.19 | 990.51  | 60.51  | o |
| 1535 | 1 | -10 | 5  | 3 | 1239.19 | 990.51  | 60.51  | o |
| 1536 | 2 | 9   | -5 | 3 | 454.54  | 372.64  | 28.66  | o |
| 1536 | 1 | -9  | 5  | 3 | 454.54  | 372.64  | 28.66  | o |
| 1537 | 2 | 7   | -5 | 3 | 64.14   | 101.92  | 9.55   | o |
| 1537 | 1 | -7  | 5  | 3 | 64.14   | 101.92  | 9.55   | o |
| 1538 | 2 | 6   | -5 | 3 | 46.22   | 41.40   | 3.18   | o |
| 1538 | 1 | -6  | 5  | 3 | 46.22   | 41.40   | 3.18   | o |
| 1539 | 2 | 5   | -5 | 3 | 853.57  | 751.64  | 25.48  | o |
| 1539 | 1 | -5  | 5  | 3 | 853.57  | 751.64  | 25.48  | o |
| 1540 | 2 | 4   | -5 | 3 | 3404.83 | 3538.45 | 108.29 | o |
| 1540 | 1 | -4  | 5  | 3 | 3404.83 | 3538.45 | 108.29 | o |

|      |   |     |    |   |          |          |         |   |
|------|---|-----|----|---|----------|----------|---------|---|
| 1541 | 2 | 3   | -5 | 3 | 507.40   | 414.04   | 12.74   | o |
| 1541 | 1 | -3  | 5  | 3 | 507.40   | 414.04   | 12.74   | o |
| 1542 | 2 | 1   | -5 | 3 | 38812.60 | 33734.70 | 1019.18 | o |
| 1542 | 1 | -1  | 5  | 3 | 38812.60 | 33734.70 | 1019.18 | o |
| 1543 | 2 | -1  | -5 | 3 | 32765.30 | 29820.50 | 961.85  | o |
| 1543 | 1 | 1   | 5  | 3 | 32765.30 | 29820.50 | 961.85  | o |
| 1544 | 2 | -4  | -5 | 3 | 4541.15  | 4210.47  | 149.69  | o |
| 1544 | 1 | 4   | 5  | 3 | 4541.15  | 4210.47  | 149.69  | o |
| 1545 | 2 | -5  | -5 | 3 | 752.33   | 595.58   | 22.29   | o |
| 1545 | 1 | 5   | 5  | 3 | 752.33   | 595.58   | 22.29   | o |
| 1546 | 2 | -6  | -5 | 3 | 146.68   | 105.10   | 9.55    | o |
| 1546 | 1 | 6   | 5  | 3 | 146.68   | 105.10   | 9.55    | o |
| 1547 | 2 | -7  | -5 | 3 | 64.19    | 66.88    | 3.18    | o |
| 1547 | 1 | 7   | 5  | 3 | 64.19    | 66.88    | 3.18    | o |
| 1548 | 2 | -8  | -5 | 3 | 1666.08  | 1407.74  | 50.96   | o |
| 1548 | 1 | 8   | 5  | 3 | 1666.08  | 1407.74  | 50.96   | o |
| 1549 | 2 | -9  | -5 | 3 | 493.49   | 372.64   | 44.59   | o |
| 1549 | 1 | 9   | 5  | 3 | 493.49   | 372.64   | 44.59   | o |
| 1550 | 2 | -10 | -5 | 3 | 1759.34  | 1652.98  | 165.62  | o |
| 1550 | 1 | 10  | 5  | 3 | 1759.34  | 1652.98  | 165.62  | o |
| 1551 | 2 | -11 | -5 | 3 | 2155.32  | 2200.78  | 98.73   | o |
| 1551 | 1 | 11  | 5  | 3 | 2155.32  | 2200.78  | 98.73   | o |
| 1552 | 2 | -12 | -5 | 3 | 161.31   | 191.10   | 12.74   | o |
| 1552 | 1 | 12  | 5  | 3 | 161.31   | 191.10   | 12.74   | o |
| 1553 | 2 | -13 | -5 | 3 | 1082.24  | 993.70   | 66.88   | o |
| 1553 | 1 | 13  | 5  | 3 | 1082.24  | 993.70   | 66.88   | o |
| 1554 | 2 | 12  | -6 | 3 | 50.15    | 63.70    | 6.37    | o |
| 1554 | 1 | -12 | 6  | 3 | 50.15    | 63.70    | 6.37    | o |
| 1555 | 2 | 11  | -6 | 3 | 26.28    | 3.18     | 6.37    | < |
| 1555 | 1 | -11 | 6  | 3 | 26.28    | 3.18     | 6.37    | < |
| 1556 | 2 | 10  | -6 | 3 | 30.84    | 12.74    | 95.55   | < |
| 1556 | 1 | -10 | 6  | 3 | 30.84    | 12.74    | 95.55   | < |
| 1557 | 2 | 9   | -6 | 3 | 22.33    | 3.18     | 15.92   | < |
| 1557 | 1 | -9  | 6  | 3 | 22.33    | 3.18     | 15.92   | < |
| 1558 | 2 | 8   | -6 | 3 | 318.92   | 273.90   | 15.92   | o |
| 1558 | 1 | -8  | 6  | 3 | 318.92   | 273.90   | 15.92   | o |
| 1559 | 2 | 7   | -6 | 3 | 45.98    | 44.59    | 6.37    | o |
| 1559 | 1 | -7  | 6  | 3 | 45.98    | 44.59    | 6.37    | o |
| 1560 | 2 | 6   | -6 | 3 | 22.09    | 12.74    | 3.18    | o |
| 1560 | 1 | -6  | 6  | 3 | 22.09    | 12.74    | 3.18    | o |
| 1561 | 2 | 5   | -6 | 3 | 346.58   | 308.94   | 12.74   | o |
| 1561 | 1 | -5  | 6  | 3 | 346.58   | 308.94   | 12.74   | o |
| 1562 | 2 | 3   | -6 | 3 | 70.76    | 82.81    | 6.37    | o |
| 1562 | 1 | -3  | 6  | 3 | 70.76    | 82.81    | 6.37    | o |
| 1563 | 2 | 1   | -6 | 3 | 132.21   | 108.29   | 6.37    | o |
| 1563 | 1 | -1  | 6  | 3 | 132.21   | 108.29   | 6.37    | o |
| 1564 | 2 | 0   | -6 | 3 | 24.23    | -25.48   | 3.18    | < |
| 1564 | 1 | 0   | 6  | 3 | 24.23    | -25.48   | 3.18    | < |
| 1565 | 2 | -2  | -6 | 3 | 381.38   | 363.08   | 12.74   | o |
| 1565 | 1 | 2   | 6  | 3 | 381.38   | 363.08   | 12.74   | o |
| 1566 | 2 | -3  | -6 | 3 | 287.96   | 245.24   | 12.74   | o |
| 1566 | 1 | 3   | 6  | 3 | 287.96   | 245.24   | 12.74   | o |
| 1567 | 2 | -5  | -6 | 3 | 89.23    | 82.81    | 9.55    | o |
| 1567 | 1 | 5   | 6  | 3 | 89.23    | 82.81    | 9.55    | o |
| 1568 | 2 | -6  | -6 | 3 | 49.05    | 57.33    | 3.18    | o |
| 1568 | 1 | 6   | 6  | 3 | 49.05    | 57.33    | 3.18    | o |
| 1569 | 2 | -7  | -6 | 3 | 154.71   | 133.77   | 6.37    | o |
| 1569 | 1 | 7   | 6  | 3 | 154.71   | 133.77   | 6.37    | o |

|      |   |     |    |   |          |          |        |   |
|------|---|-----|----|---|----------|----------|--------|---|
| 1570 | 2 | -8  | -6 | 3 | 165.27   | 111.47   | 15.92  | o |
| 1570 | 1 | 8   | 6  | 3 | 165.27   | 111.47   | 15.92  | o |
| 1571 | 2 | -9  | -6 | 3 | 90.97    | 95.55    | 6.37   | o |
| 1571 | 1 | 9   | 6  | 3 | 90.97    | 95.55    | 6.37   | o |
| 1572 | 2 | -10 | -6 | 3 | 104.16   | 121.03   | 9.55   | o |
| 1572 | 1 | 10  | 6  | 3 | 104.16   | 121.03   | 9.55   | o |
| 1573 | 2 | -11 | -6 | 3 | 91.06    | 105.10   | 9.55   | o |
| 1573 | 1 | 11  | 6  | 3 | 91.06    | 105.10   | 9.55   | o |
| 1574 | 2 | -12 | -6 | 3 | 17.78    | 19.11    | 6.37   | o |
| 1574 | 1 | 12  | 6  | 3 | 17.78    | 19.11    | 6.37   | o |
| 1575 | 2 | -13 | -6 | 3 | 17.92    | 6.37     | 6.37   | < |
| 1575 | 1 | 13  | 6  | 3 | 17.92    | 6.37     | 6.37   | < |
| 1576 | 2 | 12  | -7 | 3 | 90.24    | 165.62   | 12.74  | o |
| 1576 | 1 | -12 | 7  | 3 | 90.24    | 165.62   | 12.74  | o |
| 1577 | 2 | 11  | -7 | 3 | 1091.57  | 961.85   | 270.72 | o |
| 1577 | 1 | -11 | 7  | 3 | 1091.57  | 961.85   | 270.72 | o |
| 1578 | 2 | 10  | -7 | 3 | 2099.10  | 1713.49  | 114.66 | o |
| 1578 | 1 | -10 | 7  | 3 | 2099.10  | 1713.49  | 114.66 | o |
| 1579 | 2 | 9   | -7 | 3 | 1681.13  | 1242.12  | 114.66 | o |
| 1579 | 1 | -9  | 7  | 3 | 1681.13  | 1242.12  | 114.66 | o |
| 1580 | 2 | 8   | -7 | 3 | 52.40    | 70.07    | 9.55   | o |
| 1580 | 1 | -8  | 7  | 3 | 52.40    | 70.07    | 9.55   | o |
| 1581 | 2 | 7   | -7 | 3 | 1143.23  | 1423.66  | 89.18  | o |
| 1581 | 1 | -7  | 7  | 3 | 1143.23  | 1423.66  | 89.18  | o |
| 1582 | 2 | 6   | -7 | 3 | 1069.83  | 885.41   | 28.66  | o |
| 1582 | 1 | -6  | 7  | 3 | 1069.83  | 885.41   | 28.66  | o |
| 1583 | 2 | 4   | -7 | 3 | 11004.80 | 11131.30 | 337.60 | o |
| 1583 | 1 | -4  | 7  | 3 | 11004.80 | 11131.30 | 337.60 | o |
| 1584 | 2 | 3   | -7 | 3 | 6166.39  | 5283.79  | 184.73 | o |
| 1584 | 1 | -3  | 7  | 3 | 6166.39  | 5283.79  | 184.73 | o |
| 1585 | 2 | 2   | -7 | 3 | 6526.30  | 7777.59  | 273.90 | o |
| 1585 | 1 | -2  | 7  | 3 | 6526.30  | 7777.59  | 273.90 | o |
| 1586 | 2 | 1   | -7 | 3 | 2409.11  | 2809.11  | 89.18  | o |
| 1586 | 1 | -1  | 7  | 3 | 2409.11  | 2809.11  | 89.18  | o |
| 1587 | 2 | -2  | -7 | 3 | 4998.98  | 6688.35  | 238.87 | o |
| 1587 | 1 | 2   | 7  | 3 | 4998.98  | 6688.35  | 238.87 | o |
| 1588 | 2 | -3  | -7 | 3 | 3630.29  | 4102.19  | 140.14 | o |
| 1588 | 1 | 3   | 7  | 3 | 3630.29  | 4102.19  | 140.14 | o |
| 1589 | 2 | -4  | -7 | 3 | 14032.30 | 12991.30 | 394.93 | o |
| 1589 | 1 | 4   | 7  | 3 | 14032.30 | 12991.30 | 394.93 | o |
| 1590 | 2 | -5  | -7 | 3 | 176.18   | 232.50   | 9.55   | o |
| 1590 | 1 | 5   | 7  | 3 | 176.18   | 232.50   | 9.55   | o |
| 1591 | 2 | -6  | -7 | 3 | 767.48   | 621.06   | 22.29  | o |
| 1591 | 1 | 6   | 7  | 3 | 767.48   | 621.06   | 22.29  | o |
| 1592 | 2 | -7  | -7 | 3 | 2115.43  | 1828.15  | 57.33  | o |
| 1592 | 1 | 7   | 7  | 3 | 2115.43  | 1828.15  | 57.33  | o |
| 1593 | 2 | -8  | -7 | 3 | 60.59    | 50.96    | 15.92  | o |
| 1593 | 1 | 8   | 7  | 3 | 60.59    | 50.96    | 15.92  | o |
| 1594 | 2 | -9  | -7 | 3 | 1656.38  | 1407.74  | 54.14  | o |
| 1594 | 1 | 9   | 7  | 3 | 1656.38  | 1407.74  | 54.14  | o |
| 1595 | 2 | -10 | -7 | 3 | 2574.50  | 2487.43  | 127.40 | o |
| 1595 | 1 | 10  | 7  | 3 | 2574.50  | 2487.43  | 127.40 | o |
| 1596 | 2 | -11 | -7 | 3 | 1198.23  | 1264.42  | 85.99  | o |
| 1596 | 1 | 11  | 7  | 3 | 1198.23  | 1264.42  | 85.99  | o |
| 1597 | 2 | -12 | -7 | 3 | 43.56    | 79.62    | 9.55   | o |
| 1597 | 1 | 12  | 7  | 3 | 43.56    | 79.62    | 9.55   | o |
| 1598 | 2 | -13 | -7 | 3 | 273.60   | 280.27   | 19.11  | o |
| 1598 | 1 | 13  | 7  | 3 | 273.60   | 280.27   | 19.11  | o |

|      |   |     |    |   |         |         |       |   |
|------|---|-----|----|---|---------|---------|-------|---|
| 1599 | 2 | 12  | -8 | 3 | 560.77  | 856.74  | 41.40 | o |
| 1599 | 1 | -12 | 8  | 3 | 560.77  | 856.74  | 41.40 | o |
| 1600 | 2 | 11  | -8 | 3 | 132.76  | 165.62  | 12.74 | o |
| 1600 | 1 | -11 | 8  | 3 | 132.76  | 165.62  | 12.74 | o |
| 1601 | 2 | 10  | -8 | 3 | 137.01  | 114.66  | 9.55  | o |
| 1601 | 1 | -10 | 8  | 3 | 137.01  | 114.66  | 9.55  | o |
| 1602 | 2 | 9   | -8 | 3 | 142.42  | 31.85   | 15.92 | < |
| 1602 | 1 | -9  | 8  | 3 | 142.42  | 31.85   | 15.92 | < |
| 1603 | 2 | 8   | -8 | 3 | 176.50  | 178.36  | 12.74 | o |
| 1603 | 1 | -8  | 8  | 3 | 176.50  | 178.36  | 12.74 | o |
| 1604 | 2 | 7   | -8 | 3 | 234.29  | 229.32  | 9.55  | o |
| 1604 | 1 | -7  | 8  | 3 | 234.29  | 229.32  | 9.55  | o |
| 1605 | 2 | 6   | -8 | 3 | 272.51  | 366.27  | 19.11 | o |
| 1605 | 1 | -6  | 8  | 3 | 272.51  | 366.27  | 19.11 | o |
| 1606 | 2 | 5   | -8 | 3 | 37.99   | 50.96   | 3.18  | o |
| 1606 | 1 | -5  | 8  | 3 | 37.99   | 50.96   | 3.18  | o |
| 1607 | 2 | 4   | -8 | 3 | 62.97   | 50.96   | 3.18  | o |
| 1607 | 1 | -4  | 8  | 3 | 62.97   | 50.96   | 3.18  | o |
| 1608 | 2 | 3   | -8 | 3 | 819.16  | 742.09  | 25.48 | o |
| 1608 | 1 | -3  | 8  | 3 | 819.16  | 742.09  | 25.48 | o |
| 1609 | 2 | 2   | -8 | 3 | 1743.36 | 2264.48 | 70.07 | o |
| 1609 | 1 | -2  | 8  | 3 | 1743.36 | 2264.48 | 70.07 | o |
| 1610 | 2 | 0   | -8 | 3 | 1658.62 | 1598.83 | 73.25 | o |
| 1610 | 1 | 0   | 8  | 3 | 1658.62 | 1598.83 | 73.25 | o |
| 1611 | 2 | -1  | -8 | 3 | 73.61   | 98.73   | 9.55  | o |
| 1611 | 1 | 1   | 8  | 3 | 73.61   | 98.73   | 9.55  | o |
| 1612 | 2 | -2  | -8 | 3 | 3142.45 | 2675.34 | 82.81 | o |
| 1612 | 1 | 2   | 8  | 3 | 3142.45 | 2675.34 | 82.81 | o |
| 1613 | 2 | -3  | -8 | 3 | 543.08  | 681.57  | 22.29 | o |
| 1613 | 1 | 3   | 8  | 3 | 543.08  | 681.57  | 22.29 | o |
| 1614 | 2 | -4  | -8 | 3 | 67.32   | 54.14   | 3.18  | o |
| 1614 | 1 | 4   | 8  | 3 | 67.32   | 54.14   | 3.18  | o |
| 1615 | 2 | -5  | -8 | 3 | 18.73   | 22.29   | 3.18  | o |
| 1615 | 1 | 5   | 8  | 3 | 18.73   | 22.29   | 3.18  | o |
| 1616 | 2 | -6  | -8 | 3 | 700.20  | 665.65  | 22.29 | o |
| 1616 | 1 | 6   | 8  | 3 | 700.20  | 665.65  | 22.29 | o |
| 1617 | 2 | -7  | -8 | 3 | 86.89   | 111.47  | 9.55  | o |
| 1617 | 1 | 7   | 8  | 3 | 86.89   | 111.47  | 9.55  | o |
| 1618 | 2 | -8  | -8 | 3 | 49.00   | 54.14   | 6.37  | o |
| 1618 | 1 | 8   | 8  | 3 | 49.00   | 54.14   | 6.37  | o |
| 1619 | 2 | -9  | -8 | 3 | 504.99  | 474.55  | 15.92 | o |
| 1619 | 1 | 9   | 8  | 3 | 504.99  | 474.55  | 15.92 | o |
| 1620 | 2 | -10 | -8 | 3 | 84.41   | 79.62   | 6.37  | o |
| 1620 | 1 | 10  | 8  | 3 | 84.41   | 79.62   | 6.37  | o |
| 1621 | 2 | -11 | -8 | 3 | 42.68   | 44.59   | 6.37  | o |
| 1621 | 1 | 11  | 8  | 3 | 42.68   | 44.59   | 6.37  | o |
| 1622 | 2 | -12 | -8 | 3 | 252.05  | 178.36  | 12.74 | o |
| 1622 | 1 | 12  | 8  | 3 | 252.05  | 178.36  | 12.74 | o |
| 1623 | 2 | -13 | -8 | 3 | 164.04  | 200.65  | 15.92 | o |
| 1623 | 1 | 13  | 8  | 3 | 164.04  | 200.65  | 15.92 | o |
| 1624 | 2 | 12  | -9 | 3 | 303.39  | 293.01  | 25.48 | o |
| 1624 | 1 | -12 | 9  | 3 | 303.39  | 293.01  | 25.48 | o |
| 1625 | 2 | 11  | -9 | 3 | 272.40  | 235.68  | 22.29 | o |
| 1625 | 1 | -11 | 9  | 3 | 272.40  | 235.68  | 22.29 | o |
| 1626 | 2 | 10  | -9 | 3 | 3.69    | 19.11   | 6.37  | o |
| 1626 | 1 | -10 | 9  | 3 | 3.69    | 19.11   | 6.37  | o |
| 1627 | 2 | 9   | -9 | 3 | 543.16  | 394.93  | 31.85 | o |
| 1627 | 1 | -9  | 9  | 3 | 543.16  | 394.93  | 31.85 | o |

|      |   |     |     |   |          |          |        |   |
|------|---|-----|-----|---|----------|----------|--------|---|
| 1628 | 2 | 8   | -9  | 3 | 118.34   | 111.47   | 9.55   | o |
| 1628 | 1 | -8  | 9   | 3 | 118.34   | 111.47   | 9.55   | o |
| 1629 | 2 | 7   | -9  | 3 | 503.68   | 410.86   | 15.92  | o |
| 1629 | 1 | -7  | 9   | 3 | 503.68   | 410.86   | 15.92  | o |
| 1630 | 2 | 6   | -9  | 3 | 848.89   | 773.94   | 25.48  | o |
| 1630 | 1 | -6  | 9   | 3 | 848.89   | 773.94   | 25.48  | o |
| 1631 | 2 | 5   | -9  | 3 | 224.04   | 216.57   | 9.55   | o |
| 1631 | 1 | -5  | 9   | 3 | 224.04   | 216.57   | 9.55   | o |
| 1632 | 2 | 4   | -9  | 3 | 15014.10 | 14115.60 | 493.66 | o |
| 1632 | 1 | -4  | 9   | 3 | 15014.10 | 14115.60 | 493.66 | o |
| 1633 | 2 | 3   | -9  | 3 | 2800.44  | 2856.88  | 101.92 | o |
| 1633 | 1 | -3  | 9   | 3 | 2800.44  | 2856.88  | 101.92 | o |
| 1634 | 2 | -1  | -9  | 3 | 456.80   | 465.00   | 15.92  | o |
| 1634 | 1 | 1   | 9   | 3 | 456.80   | 465.00   | 15.92  | o |
| 1635 | 2 | -3  | -9  | 3 | 3492.83  | 3258.18  | 143.32 | o |
| 1635 | 1 | 3   | 9   | 3 | 3492.83  | 3258.18  | 143.32 | o |
| 1636 | 2 | -4  | -9  | 3 | 13490.50 | 13669.70 | 484.11 | o |
| 1636 | 1 | 4   | 9   | 3 | 13490.50 | 13669.70 | 484.11 | o |
| 1637 | 2 | -5  | -9  | 3 | 131.19   | 152.88   | 9.55   | o |
| 1637 | 1 | 5   | 9   | 3 | 131.19   | 152.88   | 9.55   | o |
| 1638 | 2 | -6  | -9  | 3 | 725.23   | 700.68   | 22.29  | o |
| 1638 | 1 | 6   | 9   | 3 | 725.23   | 700.68   | 22.29  | o |
| 1639 | 2 | -7  | -9  | 3 | 779.66   | 786.68   | 25.48  | o |
| 1639 | 1 | 7   | 9   | 3 | 779.66   | 786.68   | 25.48  | o |
| 1640 | 2 | -8  | -9  | 3 | 45.57    | 50.96    | 12.74  | o |
| 1640 | 1 | 8   | 9   | 3 | 45.57    | 50.96    | 12.74  | o |
| 1641 | 2 | -10 | -9  | 3 | 14.19    | 15.92    | 3.18   | o |
| 1641 | 1 | 10  | 9   | 3 | 14.19    | 15.92    | 3.18   | o |
| 1642 | 2 | -11 | -9  | 3 | 292.36   | 356.71   | 22.29  | o |
| 1642 | 1 | 11  | 9   | 3 | 292.36   | 356.71   | 22.29  | o |
| 1643 | 2 | -12 | -9  | 3 | 290.79   | 257.98   | 19.11  | o |
| 1643 | 1 | 12  | 9   | 3 | 290.79   | 257.98   | 19.11  | o |
| 1644 | 2 | -13 | -9  | 3 | 6.66     | 9.55     | 6.37   | < |
| 1644 | 1 | 13  | 9   | 3 | 6.66     | 9.55     | 6.37   | < |
| 1645 | 2 | 12  | -10 | 3 | 90.62    | 124.21   | 12.74  | o |
| 1645 | 1 | -12 | 10  | 3 | 90.62    | 124.21   | 12.74  | o |
| 1646 | 2 | 11  | -10 | 3 | 165.01   | 200.65   | 15.92  | o |
| 1646 | 1 | -11 | 10  | 3 | 165.01   | 200.65   | 15.92  | o |
| 1647 | 2 | 10  | -10 | 3 | 215.37   | 181.54   | 15.92  | o |
| 1647 | 1 | -10 | 10  | 3 | 215.37   | 181.54   | 15.92  | o |
| 1648 | 2 | 9   | -10 | 3 | 77.89    | 57.33    | 9.55   | o |
| 1648 | 1 | -9  | 10  | 3 | 77.89    | 57.33    | 9.55   | o |
| 1649 | 2 | 8   | -10 | 3 | 511.50   | 391.75   | 22.29  | o |
| 1649 | 1 | -8  | 10  | 3 | 511.50   | 391.75   | 22.29  | o |
| 1650 | 2 | 7   | -10 | 3 | 26.57    | 28.66    | 3.18   | o |
| 1650 | 1 | -7  | 10  | 3 | 26.57    | 28.66    | 3.18   | o |
| 1651 | 2 | 6   | -10 | 3 | 1502.14  | 1391.81  | 44.59  | o |
| 1651 | 1 | -6  | 10  | 3 | 1502.14  | 1391.81  | 44.59  | o |
| 1652 | 2 | 5   | -10 | 3 | 27.13    | 28.66    | 3.18   | o |
| 1652 | 1 | -5  | 10  | 3 | 27.13    | 28.66    | 3.18   | o |
| 1653 | 2 | 4   | -10 | 3 | 1384.96  | 1149.76  | 38.22  | o |
| 1653 | 1 | -4  | 10  | 3 | 1384.96  | 1149.76  | 38.22  | o |
| 1654 | 2 | 3   | -10 | 3 | 9.88     | 15.92    | 3.18   | o |
| 1654 | 1 | -3  | 10  | 3 | 9.88     | 15.92    | 3.18   | o |
| 1655 | 2 | 2   | -10 | 3 | 139.96   | 117.84   | 6.37   | o |
| 1655 | 1 | -2  | 10  | 3 | 139.96   | 117.84   | 6.37   | o |
| 1656 | 2 | 1   | -10 | 3 | 36.69    | 44.59    | 3.18   | o |
| 1656 | 1 | -1  | 10  | 3 | 36.69    | 44.59    | 3.18   | o |

|      |   |     |     |   |          |          |        |   |
|------|---|-----|-----|---|----------|----------|--------|---|
| 1657 | 2 | 0   | -10 | 3 | 24.76    | 0.00     | 3.18   | < |
| 1657 | 1 | 0   | 10  | 3 | 24.76    | 0.00     | 3.18   | < |
| 1658 | 2 | -1  | -10 | 3 | 32.64    | 44.59    | 3.18   | o |
| 1658 | 1 | 1   | 10  | 3 | 32.64    | 44.59    | 3.18   | o |
| 1659 | 2 | -2  | -10 | 3 | 113.13   | 114.66   | 6.37   | o |
| 1659 | 1 | 2   | 10  | 3 | 113.13   | 114.66   | 6.37   | o |
| 1660 | 2 | -3  | -10 | 3 | 6.26     | 19.11    | 3.18   | o |
| 1660 | 1 | 3   | 10  | 3 | 6.26     | 19.11    | 3.18   | o |
| 1661 | 2 | -4  | -10 | 3 | 1109.37  | 1079.69  | 35.03  | o |
| 1661 | 1 | 4   | 10  | 3 | 1109.37  | 1079.69  | 35.03  | o |
| 1662 | 2 | -5  | -10 | 3 | 50.77    | 57.33    | 3.18   | o |
| 1662 | 1 | 5   | 10  | 3 | 50.77    | 57.33    | 3.18   | o |
| 1663 | 2 | -6  | -10 | 3 | 1053.02  | 1063.77  | 41.40  | o |
| 1663 | 1 | 6   | 10  | 3 | 1053.02  | 1063.77  | 41.40  | o |
| 1664 | 2 | -7  | -10 | 3 | 62.75    | 60.51    | 6.37   | o |
| 1664 | 1 | 7   | 10  | 3 | 62.75    | 60.51    | 6.37   | o |
| 1665 | 2 | -8  | -10 | 3 | 660.70   | 576.47   | 19.11  | o |
| 1665 | 1 | 8   | 10  | 3 | 660.70   | 576.47   | 19.11  | o |
| 1666 | 2 | -9  | -10 | 3 | 124.69   | 101.92   | 6.37   | o |
| 1666 | 1 | 9   | 10  | 3 | 124.69   | 101.92   | 6.37   | o |
| 1667 | 2 | -10 | -10 | 3 | 123.51   | 101.92   | 19.11  | o |
| 1667 | 1 | 10  | 10  | 3 | 123.51   | 101.92   | 19.11  | o |
| 1668 | 2 | -11 | -10 | 3 | 63.67    | 73.25    | 9.55   | o |
| 1668 | 1 | 11  | 10  | 3 | 63.67    | 73.25    | 9.55   | o |
| 1669 | 2 | -12 | -10 | 3 | 50.36    | 47.77    | 6.37   | o |
| 1669 | 1 | 12  | 10  | 3 | 50.36    | 47.77    | 6.37   | o |
| 1670 | 2 | -13 | -10 | 3 | 14.98    | 9.55     | 6.37   | < |
| 1670 | 1 | 13  | 10  | 3 | 14.98    | 9.55     | 6.37   | < |
| 1671 | 2 | 12  | -11 | 3 | 1222.19  | 1191.16  | 82.81  | o |
| 1671 | 1 | -12 | 11  | 3 | 1222.19  | 1191.16  | 82.81  | o |
| 1672 | 2 | 11  | -11 | 3 | 1042.34  | 936.37   | 73.25  | o |
| 1672 | 1 | -11 | 11  | 3 | 1042.34  | 936.37   | 73.25  | o |
| 1673 | 2 | 10  | -11 | 3 | 578.93   | 359.90   | 47.77  | o |
| 1673 | 1 | -10 | 11  | 3 | 578.93   | 359.90   | 47.77  | o |
| 1674 | 2 | 9   | -11 | 3 | 433.78   | 286.64   | 25.48  | o |
| 1674 | 1 | -9  | 11  | 3 | 433.78   | 286.64   | 25.48  | o |
| 1675 | 2 | 8   | -11 | 3 | 3536.70  | 3159.45  | 114.66 | o |
| 1675 | 1 | -8  | 11  | 3 | 3536.70  | 3159.45  | 114.66 | o |
| 1676 | 2 | 7   | -11 | 3 | 9706.85  | 8933.72  | 270.72 | o |
| 1676 | 1 | -7  | 11  | 3 | 9706.85  | 8933.72  | 270.72 | o |
| 1677 | 2 | 6   | -11 | 3 | 1754.40  | 2098.87  | 66.88  | o |
| 1677 | 1 | -6  | 11  | 3 | 1754.40  | 2098.87  | 66.88  | o |
| 1678 | 2 | 5   | -11 | 3 | 9839.98  | 8936.91  | 270.72 | o |
| 1678 | 1 | -5  | 11  | 3 | 9839.98  | 8936.91  | 270.72 | o |
| 1679 | 2 | 4   | -11 | 3 | 19673.80 | 18549.00 | 646.54 | o |
| 1679 | 1 | -4  | 11  | 3 | 19673.80 | 18549.00 | 646.54 | o |
| 1680 | 2 | 2   | -11 | 3 | 2535.82  | 2885.54  | 89.18  | o |
| 1680 | 1 | -2  | 11  | 3 | 2535.82  | 2885.54  | 89.18  | o |
| 1681 | 2 | 1   | -11 | 3 | 6040.21  | 7280.74  | 315.31 | o |
| 1681 | 1 | -1  | 11  | 3 | 6040.21  | 7280.74  | 315.31 | o |
| 1682 | 2 | -1  | -11 | 3 | 9585.68  | 7847.66  | 238.87 | o |
| 1682 | 1 | 1   | 11  | 3 | 9585.68  | 7847.66  | 238.87 | o |
| 1683 | 2 | -2  | -11 | 3 | 3407.78  | 3270.92  | 117.84 | o |
| 1683 | 1 | 2   | 11  | 3 | 3407.78  | 3270.92  | 117.84 | o |
| 1684 | 2 | -3  | -11 | 3 | 419.74   | 468.18   | 19.11  | o |
| 1684 | 1 | 3   | 11  | 3 | 419.74   | 468.18   | 19.11  | o |
| 1685 | 2 | -4  | -11 | 3 | 17187.90 | 17883.40 | 582.84 | o |
| 1685 | 1 | 4   | 11  | 3 | 17187.90 | 17883.40 | 582.84 | o |

|      |   |     |     |   |         |         |        |   |
|------|---|-----|-----|---|---------|---------|--------|---|
| 1686 | 2 | -5  | -11 | 3 | 8199.75 | 8570.64 | 261.16 | o |
| 1686 | 1 | 5   | 11  | 3 | 8199.75 | 8570.64 | 261.16 | o |
| 1687 | 2 | -6  | -11 | 3 | 2108.11 | 2446.02 | 76.44  | o |
| 1687 | 1 | 6   | 11  | 3 | 2108.11 | 2446.02 | 76.44  | o |
| 1688 | 2 | -7  | -11 | 3 | 9701.37 | 9080.23 | 273.90 | o |
| 1688 | 1 | 7   | 11  | 3 | 9701.37 | 9080.23 | 273.90 | o |
| 1689 | 2 | -8  | -11 | 3 | 4544.66 | 3853.76 | 162.43 | o |
| 1689 | 1 | 8   | 11  | 3 | 4544.66 | 3853.76 | 162.43 | o |
| 1690 | 2 | -9  | -11 | 3 | 531.99  | 398.12  | 15.92  | o |
| 1690 | 1 | 9   | 11  | 3 | 531.99  | 398.12  | 15.92  | o |
| 1691 | 2 | -10 | -11 | 3 | 769.31  | 633.80  | 60.51  | o |
| 1691 | 1 | 10  | 11  | 3 | 769.31  | 633.80  | 60.51  | o |
| 1692 | 2 | -11 | -11 | 3 | 1207.18 | 1261.23 | 143.32 | o |
| 1692 | 1 | 11  | 11  | 3 | 1207.18 | 1261.23 | 143.32 | o |
| 1693 | 2 | -12 | -11 | 3 | 1139.10 | 1108.35 | 54.14  | o |
| 1693 | 1 | 12  | 11  | 3 | 1139.10 | 1108.35 | 54.14  | o |
| 1694 | 2 | -13 | -11 | 3 | 24.57   | 15.92   | 6.37   | < |
| 1694 | 1 | 13  | 11  | 3 | 24.57   | 15.92   | 6.37   | < |
| 1695 | 2 | 12  | -12 | 3 | 88.88   | 136.95  | 12.74  | o |
| 1695 | 1 | -12 | 12  | 3 | 88.88   | 136.95  | 12.74  | o |
| 1696 | 2 | 11  | -12 | 3 | 113.27  | 136.95  | 12.74  | o |
| 1696 | 1 | -11 | 12  | 3 | 113.27  | 136.95  | 12.74  | o |
| 1697 | 2 | 10  | -12 | 3 | 738.10  | 770.75  | 54.14  | o |
| 1697 | 1 | -10 | 12  | 3 | 738.10  | 770.75  | 54.14  | o |
| 1698 | 2 | 9   | -12 | 3 | 93.17   | 70.07   | 12.74  | o |
| 1698 | 1 | -9  | 12  | 3 | 93.17   | 70.07   | 12.74  | o |
| 1699 | 2 | 8   | -12 | 3 | 48.15   | 22.29   | 12.74  | < |
| 1699 | 1 | -8  | 12  | 3 | 48.15   | 22.29   | 12.74  | < |
| 1700 | 2 | 7   | -12 | 3 | 160.93  | 117.84  | 6.37   | o |
| 1700 | 1 | -7  | 12  | 3 | 160.93  | 117.84  | 6.37   | o |
| 1701 | 2 | 6   | -12 | 3 | 726.47  | 678.39  | 22.29  | o |
| 1701 | 1 | -6  | 12  | 3 | 726.47  | 678.39  | 22.29  | o |
| 1702 | 2 | 4   | -12 | 3 | 196.49  | 171.99  | 9.55   | o |
| 1702 | 1 | -4  | 12  | 3 | 196.49  | 171.99  | 9.55   | o |
| 1703 | 2 | 3   | -12 | 3 | 2502.43 | 2264.48 | 82.81  | o |
| 1703 | 1 | -3  | 12  | 3 | 2502.43 | 2264.48 | 82.81  | o |
| 1704 | 2 | 2   | -12 | 3 | 37.30   | 50.96   | 6.37   | o |
| 1704 | 1 | -2  | 12  | 3 | 37.30   | 50.96   | 6.37   | o |
| 1705 | 2 | 1   | -12 | 3 | 66.50   | 57.33   | 3.18   | o |
| 1705 | 1 | -1  | 12  | 3 | 66.50   | 57.33   | 3.18   | o |
| 1706 | 2 | 0   | -12 | 3 | 3982.82 | 4213.66 | 130.58 | o |
| 1706 | 1 | 0   | 12  | 3 | 3982.82 | 4213.66 | 130.58 | o |
| 1707 | 2 | -1  | -12 | 3 | 53.15   | 60.51   | 3.18   | o |
| 1707 | 1 | 1   | 12  | 3 | 53.15   | 60.51   | 3.18   | o |
| 1708 | 2 | -2  | -12 | 3 | 77.90   | 66.88   | 6.37   | o |
| 1708 | 1 | 2   | 12  | 3 | 77.90   | 66.88   | 6.37   | o |
| 1709 | 2 | -3  | -12 | 3 | 1336.32 | 1834.52 | 70.07  | o |
| 1709 | 1 | 3   | 12  | 3 | 1336.32 | 1834.52 | 70.07  | o |
| 1710 | 2 | -4  | -12 | 3 | 252.67  | 226.13  | 9.55   | o |
| 1710 | 1 | 4   | 12  | 3 | 252.67  | 226.13  | 9.55   | o |
| 1711 | 2 | -5  | -12 | 3 | 436.95  | 328.05  | 15.92  | o |
| 1711 | 1 | 5   | 12  | 3 | 436.95  | 328.05  | 15.92  | o |
| 1712 | 2 | -6  | -12 | 3 | 482.51  | 608.32  | 25.48  | o |
| 1712 | 1 | 6   | 12  | 3 | 482.51  | 608.32  | 25.48  | o |
| 1713 | 2 | -7  | -12 | 3 | 550.57  | 506.40  | 19.11  | o |
| 1713 | 1 | 7   | 12  | 3 | 550.57  | 506.40  | 19.11  | o |
| 1714 | 2 | -8  | -12 | 3 | 172.21  | 146.51  | 9.55   | o |
| 1714 | 1 | 8   | 12  | 3 | 172.21  | 146.51  | 9.55   | o |

|      |   |     |     |   |         |         |        |   |
|------|---|-----|-----|---|---------|---------|--------|---|
| 1715 | 2 | -9  | -12 | 3 | 97.30   | 95.55   | 6.37   | o |
| 1715 | 1 | 9   | 12  | 3 | 97.30   | 95.55   | 6.37   | o |
| 1716 | 2 | -10 | -12 | 3 | 479.28  | 312.12  | 38.22  | o |
| 1716 | 1 | 10  | 12  | 3 | 479.28  | 312.12  | 38.22  | o |
| 1717 | 2 | -11 | -12 | 3 | 27.74   | 22.29   | 6.37   | o |
| 1717 | 1 | 11  | 12  | 3 | 27.74   | 22.29   | 6.37   | o |
| 1718 | 2 | -12 | -12 | 3 | 23.74   | 19.11   | 6.37   | o |
| 1718 | 1 | 12  | 12  | 3 | 23.74   | 19.11   | 6.37   | o |
| 1719 | 2 | 12  | -13 | 3 | 232.68  | 171.99  | 19.11  | o |
| 1719 | 1 | -12 | 13  | 3 | 232.68  | 171.99  | 19.11  | o |
| 1720 | 2 | 11  | -13 | 3 | 26.52   | 15.92   | 6.37   | < |
| 1720 | 1 | -11 | 13  | 3 | 26.52   | 15.92   | 6.37   | < |
| 1721 | 2 | 10  | -13 | 3 | 613.90  | 605.14  | 79.62  | o |
| 1721 | 1 | -10 | 13  | 3 | 613.90  | 605.14  | 79.62  | o |
| 1722 | 2 | 9   | -13 | 3 | 770.85  | 544.62  | 41.40  | o |
| 1722 | 1 | -9  | 13  | 3 | 770.85  | 544.62  | 41.40  | o |
| 1723 | 2 | 8   | -13 | 3 | 6289.53 | 6140.54 | 216.57 | o |
| 1723 | 1 | -8  | 13  | 3 | 6289.53 | 6140.54 | 216.57 | o |
| 1724 | 2 | 7   | -13 | 3 | 72.35   | 73.25   | 6.37   | o |
| 1724 | 1 | -7  | 13  | 3 | 72.35   | 73.25   | 6.37   | o |
| 1725 | 2 | 5   | -13 | 3 | 6269.30 | 6889.00 | 210.21 | o |
| 1725 | 1 | -5  | 13  | 3 | 6269.30 | 6889.00 | 210.21 | o |
| 1726 | 2 | 4   | -13 | 3 | 3573.38 | 3165.82 | 114.66 | o |
| 1726 | 1 | -4  | 13  | 3 | 3573.38 | 3165.82 | 114.66 | o |
| 1727 | 2 | 3   | -13 | 3 | 7632.25 | 6666.05 | 203.84 | o |
| 1727 | 1 | -3  | 13  | 3 | 7632.25 | 6666.05 | 203.84 | o |
| 1728 | 2 | 1   | -13 | 3 | 2414.89 | 2207.15 | 70.07  | o |
| 1728 | 1 | -1  | 13  | 3 | 2414.89 | 2207.15 | 70.07  | o |
| 1729 | 2 | 0   | -13 | 3 | 128.45  | 162.43  | 6.37   | o |
| 1729 | 1 | 0   | 13  | 3 | 128.45  | 162.43  | 6.37   | o |
| 1730 | 2 | -3  | -13 | 3 | 5282.32 | 6019.51 | 184.73 | o |
| 1730 | 1 | 3   | 13  | 3 | 5282.32 | 6019.51 | 184.73 | o |
| 1731 | 2 | -4  | -13 | 3 | 2569.20 | 2872.80 | 105.10 | o |
| 1731 | 1 | 4   | 13  | 3 | 2569.20 | 2872.80 | 105.10 | o |
| 1732 | 2 | -5  | -13 | 3 | 8261.73 | 7959.13 | 242.05 | o |
| 1732 | 1 | 5   | 13  | 3 | 8261.73 | 7959.13 | 242.05 | o |
| 1733 | 2 | -7  | -13 | 3 | 64.18   | 66.88   | 9.55   | o |
| 1733 | 1 | 7   | 13  | 3 | 64.18   | 66.88   | 9.55   | o |
| 1734 | 2 | -8  | -13 | 3 | 5478.67 | 5427.12 | 178.36 | o |
| 1734 | 1 | 8   | 13  | 3 | 5478.67 | 5427.12 | 178.36 | o |
| 1735 | 2 | -9  | -13 | 3 | 1205.77 | 1226.20 | 50.96  | o |
| 1735 | 1 | 9   | 13  | 3 | 1205.77 | 1226.20 | 50.96  | o |
| 1736 | 2 | -10 | -13 | 3 | 650.78  | 627.43  | 54.14  | o |
| 1736 | 1 | 10  | 13  | 3 | 650.78  | 627.43  | 54.14  | o |
| 1737 | 2 | -11 | -13 | 3 | 23.05   | 47.77   | 6.37   | o |
| 1737 | 1 | 11  | 13  | 3 | 23.05   | 47.77   | 6.37   | o |
| 1738 | 2 | -12 | -13 | 3 | 342.20  | 308.94  | 19.11  | o |
| 1738 | 1 | 12  | 13  | 3 | 342.20  | 308.94  | 19.11  | o |
| 1739 | 2 | 12  | -14 | 3 | 144.85  | 181.54  | 19.11  | o |
| 1739 | 1 | -12 | 14  | 3 | 144.85  | 181.54  | 19.11  | o |
| 1740 | 2 | 11  | -14 | 3 | 73.38   | 47.77   | 9.55   | o |
| 1740 | 1 | -11 | 14  | 3 | 73.38   | 47.77   | 9.55   | o |
| 1741 | 2 | 10  | -14 | 3 | 113.97  | 111.47  | 9.55   | o |
| 1741 | 1 | -10 | 14  | 3 | 113.97  | 111.47  | 9.55   | o |
| 1742 | 2 | 9   | -14 | 3 | 43.05   | 57.33   | 15.92  | o |
| 1742 | 1 | -9  | 14  | 3 | 43.05   | 57.33   | 15.92  | o |
| 1743 | 2 | 8   | -14 | 3 | 434.56  | 410.86  | 19.11  | o |
| 1743 | 1 | -8  | 14  | 3 | 434.56  | 410.86  | 19.11  | o |



|      |   |     |     |   |         |         |        |   |
|------|---|-----|-----|---|---------|---------|--------|---|
| 1744 | 2 | 7   | -14 | 3 | 16.65   | 12.74   | 3.18   | o |
| 1744 | 1 | -7  | 14  | 3 | 16.65   | 12.74   | 3.18   | o |
| 1745 | 2 | 6   | -14 | 3 | 14.32   | 19.11   | 3.18   | o |
| 1745 | 1 | -6  | 14  | 3 | 14.32   | 19.11   | 3.18   | o |
| 1746 | 2 | 5   | -14 | 3 | 188.63  | 159.25  | 9.55   | o |
| 1746 | 1 | -5  | 14  | 3 | 188.63  | 159.25  | 9.55   | o |
| 1747 | 2 | 4   | -14 | 3 | 340.27  | 484.11  | 19.11  | o |
| 1747 | 1 | -4  | 14  | 3 | 340.27  | 484.11  | 19.11  | o |
| 1748 | 2 | 3   | -14 | 3 | 0.55    | 3.18    | 3.18   | < |
| 1748 | 1 | -3  | 14  | 3 | 0.55    | 3.18    | 3.18   | < |
| 1749 | 2 | 2   | -14 | 3 | 456.86  | 477.74  | 19.11  | o |
| 1749 | 1 | -2  | 14  | 3 | 456.86  | 477.74  | 19.11  | o |
| 1750 | 2 | 1   | -14 | 3 | 15.99   | 35.03   | 3.18   | o |
| 1750 | 1 | -1  | 14  | 3 | 15.99   | 35.03   | 3.18   | o |
| 1751 | 2 | 0   | -14 | 3 | 871.33  | 968.22  | 31.85  | o |
| 1751 | 1 | 0   | 14  | 3 | 871.33  | 968.22  | 31.85  | o |
| 1752 | 2 | -1  | -14 | 3 | 50.24   | 44.59   | 3.18   | o |
| 1752 | 1 | 1   | 14  | 3 | 50.24   | 44.59   | 3.18   | o |
| 1753 | 2 | -2  | -14 | 3 | 499.88  | 512.77  | 19.11  | o |
| 1753 | 1 | 2   | 14  | 3 | 499.88  | 512.77  | 19.11  | o |
| 1754 | 2 | -3  | -14 | 3 | 1.75    | 3.18    | 3.18   | < |
| 1754 | 1 | 3   | 14  | 3 | 1.75    | 3.18    | 3.18   | < |
| 1755 | 2 | -4  | -14 | 3 | 708.50  | 617.88  | 22.29  | o |
| 1755 | 1 | 4   | 14  | 3 | 708.50  | 617.88  | 22.29  | o |
| 1756 | 2 | -5  | -14 | 3 | 151.72  | 152.88  | 6.37   | o |
| 1756 | 1 | 5   | 14  | 3 | 151.72  | 152.88  | 6.37   | o |
| 1757 | 2 | -6  | -14 | 3 | 43.64   | 50.96   | 3.18   | o |
| 1757 | 1 | 6   | 14  | 3 | 43.64   | 50.96   | 3.18   | o |
| 1758 | 2 | -7  | -14 | 3 | 5.56    | 3.18    | 3.18   | < |
| 1758 | 1 | 7   | 14  | 3 | 5.56    | 3.18    | 3.18   | < |
| 1759 | 2 | -8  | -14 | 3 | 464.21  | 423.60  | 15.92  | o |
| 1759 | 1 | 8   | 14  | 3 | 464.21  | 423.60  | 15.92  | o |
| 1760 | 2 | -9  | -14 | 3 | 27.92   | 28.66   | 3.18   | o |
| 1760 | 1 | 9   | 14  | 3 | 27.92   | 28.66   | 3.18   | o |
| 1761 | 2 | -10 | -14 | 3 | 35.68   | 25.48   | 6.37   | o |
| 1761 | 1 | 10  | 14  | 3 | 35.68   | 25.48   | 6.37   | o |
| 1762 | 2 | -11 | -14 | 3 | 176.01  | 178.36  | 12.74  | o |
| 1762 | 1 | 11  | 14  | 3 | 176.01  | 178.36  | 12.74  | o |
| 1763 | 2 | -12 | -14 | 3 | 129.05  | 140.14  | 25.48  | o |
| 1763 | 1 | 12  | 14  | 3 | 129.05  | 140.14  | 25.48  | o |
| 1764 | 2 | 12  | -15 | 3 | 538.53  | 538.25  | 35.03  | o |
| 1764 | 1 | -12 | 15  | 3 | 538.53  | 538.25  | 35.03  | o |
| 1765 | 2 | 11  | -15 | 3 | 1463.81 | 1264.42 | 95.55  | o |
| 1765 | 1 | -11 | 15  | 3 | 1463.81 | 1264.42 | 95.55  | o |
| 1766 | 2 | 10  | -15 | 3 | 1994.88 | 1824.96 | 82.81  | o |
| 1766 | 1 | -10 | 15  | 3 | 1994.88 | 1824.96 | 82.81  | o |
| 1767 | 2 | 9   | -15 | 3 | 1620.30 | 1417.29 | 44.59  | o |
| 1767 | 1 | -9  | 15  | 3 | 1620.30 | 1417.29 | 44.59  | o |
| 1768 | 2 | 8   | -15 | 3 | 238.63  | 245.24  | 12.74  | o |
| 1768 | 1 | -8  | 15  | 3 | 238.63  | 245.24  | 12.74  | o |
| 1769 | 2 | 7   | -15 | 3 | 548.53  | 429.96  | 19.11  | o |
| 1769 | 1 | -7  | 15  | 3 | 548.53  | 429.96  | 19.11  | o |
| 1770 | 2 | 6   | -15 | 3 | 1300.04 | 1480.99 | 57.33  | o |
| 1770 | 1 | -6  | 15  | 3 | 1300.04 | 1480.99 | 57.33  | o |
| 1771 | 2 | 5   | -15 | 3 | 1658.69 | 1309.01 | 50.96  | o |
| 1771 | 1 | -5  | 15  | 3 | 1658.69 | 1309.01 | 50.96  | o |
| 1772 | 2 | 4   | -15 | 3 | 8094.28 | 7647.01 | 232.50 | o |
| 1772 | 1 | -4  | 15  | 3 | 8094.28 | 7647.01 | 232.50 | o |

|      |   |     |     |   |          |          |        |   |
|------|---|-----|-----|---|----------|----------|--------|---|
| 1773 | 2 | 3   | -15 | 3 | 334.26   | 359.90   | 15.92  | o |
| 1773 | 1 | -3  | 15  | 3 | 334.26   | 359.90   | 15.92  | o |
| 1774 | 2 | 2   | -15 | 3 | 8645.54  | 8303.11  | 251.61 | o |
| 1774 | 1 | -2  | 15  | 3 | 8645.54  | 8303.11  | 251.61 | o |
| 1775 | 2 | 1   | -15 | 3 | 17253.50 | 17822.90 | 538.25 | o |
| 1775 | 1 | -1  | 15  | 3 | 17253.50 | 17822.90 | 538.25 | o |
| 1776 | 2 | -1  | -15 | 3 | 18697.30 | 18424.80 | 557.36 | o |
| 1776 | 1 | 1   | 15  | 3 | 18697.30 | 18424.80 | 557.36 | o |
| 1777 | 2 | -2  | -15 | 3 | 8829.88  | 8459.17  | 257.98 | o |
| 1777 | 1 | 2   | 15  | 3 | 8829.88  | 8459.17  | 257.98 | o |
| 1778 | 2 | -4  | -15 | 3 | 7359.17  | 7204.31  | 254.79 | o |
| 1778 | 1 | 4   | 15  | 3 | 7359.17  | 7204.31  | 254.79 | o |
| 1779 | 2 | -5  | -15 | 3 | 1340.69  | 1296.27  | 44.59  | o |
| 1779 | 1 | 5   | 15  | 3 | 1340.69  | 1296.27  | 44.59  | o |
| 1780 | 2 | -6  | -15 | 3 | 1382.18  | 1576.54  | 60.51  | o |
| 1780 | 1 | 6   | 15  | 3 | 1382.18  | 1576.54  | 60.51  | o |
| 1781 | 2 | -7  | -15 | 3 | 936.95   | 802.60   | 28.66  | o |
| 1781 | 1 | 7   | 15  | 3 | 936.95   | 802.60   | 28.66  | o |
| 1782 | 2 | -8  | -15 | 3 | 156.87   | 127.40   | 6.37   | o |
| 1782 | 1 | 8   | 15  | 3 | 156.87   | 127.40   | 6.37   | o |
| 1783 | 2 | -9  | -15 | 3 | 1347.25  | 1066.95  | 38.22  | o |
| 1783 | 1 | 9   | 15  | 3 | 1347.25  | 1066.95  | 38.22  | o |
| 1784 | 2 | -10 | -15 | 3 | 2325.62  | 2124.35  | 98.73  | o |
| 1784 | 1 | 10  | 15  | 3 | 2325.62  | 2124.35  | 98.73  | o |
| 1785 | 2 | -11 | -15 | 3 | 1565.57  | 1525.58  | 82.81  | o |
| 1785 | 1 | 11  | 15  | 3 | 1565.57  | 1525.58  | 82.81  | o |
| 1786 | 2 | -12 | -15 | 3 | 416.60   | 420.41   | 31.85  | o |
| 1786 | 1 | 12  | 15  | 3 | 416.60   | 420.41   | 31.85  | o |
| 1787 | 2 | 12  | -16 | 3 | 100.16   | 133.77   | 12.74  | o |
| 1787 | 1 | -12 | 16  | 3 | 100.16   | 133.77   | 12.74  | o |
| 1788 | 2 | 11  | -16 | 3 | 39.42    | 12.74    | 136.95 | < |
| 1788 | 1 | -11 | 16  | 3 | 39.42    | 12.74    | 136.95 | < |
| 1789 | 2 | 10  | -16 | 3 | 16.89    | 28.66    | 6.37   | o |
| 1789 | 1 | -10 | 16  | 3 | 16.89    | 28.66    | 6.37   | o |
| 1790 | 2 | 9   | -16 | 3 | 478.50   | 528.70   | 19.11  | o |
| 1790 | 1 | -9  | 16  | 3 | 478.50   | 528.70   | 19.11  | o |
| 1791 | 2 | 8   | -16 | 3 | 955.90   | 971.40   | 35.03  | o |
| 1791 | 1 | -8  | 16  | 3 | 955.90   | 971.40   | 35.03  | o |
| 1792 | 2 | 7   | -16 | 3 | 141.73   | 133.77   | 9.55   | o |
| 1792 | 1 | -7  | 16  | 3 | 141.73   | 133.77   | 9.55   | o |
| 1793 | 2 | 6   | -16 | 3 | 1855.08  | 1812.22  | 60.51  | o |
| 1793 | 1 | -6  | 16  | 3 | 1855.08  | 1812.22  | 60.51  | o |
| 1794 | 2 | 4   | -16 | 3 | 1416.63  | 1388.63  | 44.59  | o |
| 1794 | 1 | -4  | 16  | 3 | 1416.63  | 1388.63  | 44.59  | o |
| 1795 | 2 | 3   | -16 | 3 | 444.22   | 379.01   | 19.11  | o |
| 1795 | 1 | -3  | 16  | 3 | 444.22   | 379.01   | 19.11  | o |
| 1796 | 2 | 2   | -16 | 3 | 259.15   | 226.13   | 9.55   | o |
| 1796 | 1 | -2  | 16  | 3 | 259.15   | 226.13   | 9.55   | o |
| 1797 | 2 | 1   | -16 | 3 | 18.05    | 28.66    | 3.18   | o |
| 1797 | 1 | -1  | 16  | 3 | 18.05    | 28.66    | 3.18   | o |
| 1798 | 2 | 0   | -16 | 3 | 442.02   | 394.93   | 15.92  | o |
| 1798 | 1 | 0   | 16  | 3 | 442.02   | 394.93   | 15.92  | o |
| 1799 | 2 | -2  | -16 | 3 | 172.91   | 213.39   | 9.55   | o |
| 1799 | 1 | 2   | 16  | 3 | 172.91   | 213.39   | 9.55   | o |
| 1800 | 2 | -3  | -16 | 3 | 234.25   | 299.38   | 15.92  | o |
| 1800 | 1 | 3   | 16  | 3 | 234.25   | 299.38   | 15.92  | o |
| 1801 | 2 | -4  | -16 | 3 | 1168.98  | 1375.89  | 44.59  | o |
| 1801 | 1 | 4   | 16  | 3 | 1168.98  | 1375.89  | 44.59  | o |

|      |   |     |     |   |          |          |        |   |
|------|---|-----|-----|---|----------|----------|--------|---|
| 1802 | 2 | -5  | -16 | 3 | 152.42   | 140.14   | 9.55   | o |
| 1802 | 1 | 5   | 16  | 3 | 152.42   | 140.14   | 9.55   | o |
| 1803 | 2 | -6  | -16 | 3 | 2253.14  | 2286.78  | 73.25  | o |
| 1803 | 1 | 6   | 16  | 3 | 2253.14  | 2286.78  | 73.25  | o |
| 1804 | 2 | -7  | -16 | 3 | 406.48   | 369.45   | 15.92  | o |
| 1804 | 1 | 7   | 16  | 3 | 406.48   | 369.45   | 15.92  | o |
| 1805 | 2 | -8  | -16 | 3 | 446.16   | 468.18   | 22.29  | o |
| 1805 | 1 | 8   | 16  | 3 | 446.16   | 468.18   | 22.29  | o |
| 1806 | 2 | -9  | -16 | 3 | 119.96   | 92.36    | 9.55   | o |
| 1806 | 1 | 9   | 16  | 3 | 119.96   | 92.36    | 9.55   | o |
| 1807 | 2 | -10 | -16 | 3 | 12.78    | 9.55     | 3.18   | o |
| 1807 | 1 | 10  | 16  | 3 | 12.78    | 9.55     | 3.18   | o |
| 1808 | 2 | -11 | -16 | 3 | 125.09   | 136.95   | 12.74  | o |
| 1808 | 1 | 11  | 16  | 3 | 125.09   | 136.95   | 12.74  | o |
| 1809 | 2 | -12 | -16 | 3 | 69.23    | 89.18    | 9.55   | o |
| 1809 | 1 | 12  | 16  | 3 | 69.23    | 89.18    | 9.55   | o |
| 1810 | 2 | 12  | -17 | 3 | 47.02    | 76.44    | 9.55   | o |
| 1810 | 1 | -12 | 17  | 3 | 47.02    | 76.44    | 9.55   | o |
| 1811 | 2 | 11  | -17 | 3 | 2091.71  | 1824.96  | 200.65 | o |
| 1811 | 1 | -11 | 17  | 3 | 2091.71  | 1824.96  | 200.65 | o |
| 1812 | 2 | 10  | -17 | 3 | 510.65   | 302.57   | 640.17 | < |
| 1812 | 1 | -10 | 17  | 3 | 510.65   | 302.57   | 640.17 | < |
| 1813 | 2 | 9   | -17 | 3 | 226.88   | 200.65   | 9.55   | o |
| 1813 | 1 | -9  | 17  | 3 | 226.88   | 200.65   | 9.55   | o |
| 1814 | 2 | 8   | -17 | 3 | 658.58   | 617.88   | 25.48  | o |
| 1814 | 1 | -8  | 17  | 3 | 658.58   | 617.88   | 25.48  | o |
| 1815 | 2 | 7   | -17 | 3 | 180.88   | 219.76   | 9.55   | o |
| 1815 | 1 | -7  | 17  | 3 | 180.88   | 219.76   | 9.55   | o |
| 1816 | 2 | 6   | -17 | 3 | 315.09   | 283.46   | 12.74  | o |
| 1816 | 1 | -6  | 17  | 3 | 315.09   | 283.46   | 12.74  | o |
| 1817 | 2 | 5   | -17 | 3 | 486.61   | 465.00   | 19.11  | o |
| 1817 | 1 | -5  | 17  | 3 | 486.61   | 465.00   | 19.11  | o |
| 1818 | 2 | 4   | -17 | 3 | 2513.49  | 2812.29  | 101.92 | o |
| 1818 | 1 | -4  | 17  | 3 | 2513.49  | 2812.29  | 101.92 | o |
| 1819 | 2 | 3   | -17 | 3 | 1499.88  | 1968.28  | 63.70  | o |
| 1819 | 1 | -3  | 17  | 3 | 1499.88  | 1968.28  | 63.70  | o |
| 1820 | 2 | 2   | -17 | 3 | 12744.50 | 11392.50 | 398.12 | o |
| 1820 | 1 | -2  | 17  | 3 | 12744.50 | 11392.50 | 398.12 | o |
| 1821 | 2 | 1   | -17 | 3 | 11455.50 | 10287.30 | 363.08 | o |
| 1821 | 1 | -1  | 17  | 3 | 11455.50 | 10287.30 | 363.08 | o |
| 1822 | 2 | 0   | -17 | 3 | 139.90   | 171.99   | 9.55   | o |
| 1822 | 1 | 0   | 17  | 3 | 139.90   | 171.99   | 9.55   | o |
| 1823 | 2 | -1  | -17 | 3 | 7494.59  | 9354.13  | 331.23 | o |
| 1823 | 1 | 1   | 17  | 3 | 7494.59  | 9354.13  | 331.23 | o |
| 1824 | 2 | -2  | -17 | 3 | 10056.50 | 11351.10 | 347.16 | o |
| 1824 | 1 | 2   | 17  | 3 | 10056.50 | 11351.10 | 347.16 | o |
| 1825 | 2 | -3  | -17 | 3 | 2693.80  | 2398.25  | 76.44  | o |
| 1825 | 1 | 3   | 17  | 3 | 2693.80  | 2398.25  | 76.44  | o |
| 1826 | 2 | -4  | -17 | 3 | 2736.38  | 2936.50  | 92.36  | o |
| 1826 | 1 | 4   | 17  | 3 | 2736.38  | 2936.50  | 92.36  | o |
| 1827 | 2 | -5  | -17 | 3 | 894.51   | 780.31   | 25.48  | o |
| 1827 | 1 | 5   | 17  | 3 | 894.51   | 780.31   | 25.48  | o |
| 1828 | 2 | -6  | -17 | 3 | 122.10   | 168.80   | 9.55   | o |
| 1828 | 1 | 6   | 17  | 3 | 122.10   | 168.80   | 9.55   | o |
| 1829 | 2 | -8  | -17 | 3 | 944.58   | 847.19   | 28.66  | o |
| 1829 | 1 | 8   | 17  | 3 | 944.58   | 847.19   | 28.66  | o |
| 1830 | 2 | -9  | -17 | 3 | 291.94   | 207.02   | 9.55   | o |
| 1830 | 1 | 9   | 17  | 3 | 291.94   | 207.02   | 9.55   | o |

|      |   |     |     |   |         |         |        |   |
|------|---|-----|-----|---|---------|---------|--------|---|
| 1831 | 2 | -10 | -17 | 3 | 762.55  | 672.02  | 28.66  | o |
| 1831 | 1 | 10  | 17  | 3 | 762.55  | 672.02  | 28.66  | o |
| 1832 | 2 | -11 | -17 | 3 | 1875.90 | 1735.79 | 117.84 | o |
| 1832 | 1 | 11  | 17  | 3 | 1875.90 | 1735.79 | 117.84 | o |
| 1833 | 2 | -12 | -17 | 3 | 18.20   | 44.59   | 6.37   | o |
| 1833 | 1 | 12  | 17  | 3 | 18.20   | 44.59   | 6.37   | o |
| 1834 | 2 | 11  | -18 | 3 | 7.94    | 3.18    | 3.18   | < |
| 1834 | 1 | -11 | 18  | 3 | 7.94    | 3.18    | 3.18   | < |
| 1835 | 2 | 10  | -18 | 3 | 101.14  | 28.66   | 152.88 | < |
| 1835 | 1 | -10 | 18  | 3 | 101.14  | 28.66   | 152.88 | < |
| 1836 | 2 | 9   | -18 | 3 | 17.65   | 19.11   | 3.18   | o |
| 1836 | 1 | -9  | 18  | 3 | 17.65   | 19.11   | 3.18   | o |
| 1837 | 2 | 8   | -18 | 3 | 793.72  | 764.38  | 28.66  | o |
| 1837 | 1 | -8  | 18  | 3 | 793.72  | 764.38  | 28.66  | o |
| 1838 | 2 | 7   | -18 | 3 | 29.69   | 38.22   | 3.18   | o |
| 1838 | 1 | -7  | 18  | 3 | 29.69   | 38.22   | 3.18   | o |
| 1839 | 2 | 6   | -18 | 3 | 581.58  | 535.07  | 19.11  | o |
| 1839 | 1 | -6  | 18  | 3 | 581.58  | 535.07  | 19.11  | o |
| 1840 | 2 | 5   | -18 | 3 | 84.52   | 95.55   | 6.37   | o |
| 1840 | 1 | -5  | 18  | 3 | 84.52   | 95.55   | 6.37   | o |
| 1841 | 2 | 4   | -18 | 3 | 78.24   | 79.62   | 6.37   | o |
| 1841 | 1 | -4  | 18  | 3 | 78.24   | 79.62   | 6.37   | o |
| 1842 | 2 | 3   | -18 | 3 | 56.89   | 89.18   | 6.37   | o |
| 1842 | 1 | -3  | 18  | 3 | 56.89   | 89.18   | 6.37   | o |
| 1843 | 2 | 2   | -18 | 3 | 1675.51 | 1738.97 | 70.07  | o |
| 1843 | 1 | -2  | 18  | 3 | 1675.51 | 1738.97 | 70.07  | o |
| 1844 | 2 | 1   | -18 | 3 | 780.07  | 722.98  | 31.85  | o |
| 1844 | 1 | -1  | 18  | 3 | 780.07  | 722.98  | 31.85  | o |
| 1845 | 2 | 0   | -18 | 3 | 173.37  | 143.32  | 6.37   | o |
| 1845 | 1 | 0   | 18  | 3 | 173.37  | 143.32  | 6.37   | o |
| 1846 | 2 | -1  | -18 | 3 | 717.00  | 780.31  | 28.66  | o |
| 1846 | 1 | 1   | 18  | 3 | 717.00  | 780.31  | 28.66  | o |
| 1847 | 2 | -2  | -18 | 3 | 1669.60 | 1789.93 | 82.81  | o |
| 1847 | 1 | 2   | 18  | 3 | 1669.60 | 1789.93 | 82.81  | o |
| 1848 | 2 | -3  | -18 | 3 | 157.68  | 133.77  | 9.55   | o |
| 1848 | 1 | 3   | 18  | 3 | 157.68  | 133.77  | 9.55   | o |
| 1849 | 2 | -4  | -18 | 3 | 20.52   | 57.33   | 6.37   | o |
| 1849 | 1 | 4   | 18  | 3 | 20.52   | 57.33   | 6.37   | o |
| 1850 | 2 | -5  | -18 | 3 | 37.47   | 73.25   | 6.37   | o |
| 1850 | 1 | 5   | 18  | 3 | 37.47   | 73.25   | 6.37   | o |
| 1851 | 2 | -6  | -18 | 3 | 677.42  | 684.76  | 38.22  | o |
| 1851 | 1 | 6   | 18  | 3 | 677.42  | 684.76  | 38.22  | o |
| 1852 | 2 | -7  | -18 | 3 | 30.79   | 35.03   | 3.18   | o |
| 1852 | 1 | 7   | 18  | 3 | 30.79   | 35.03   | 3.18   | o |
| 1853 | 2 | -8  | -18 | 3 | 527.60  | 458.63  | 19.11  | o |
| 1853 | 1 | 8   | 18  | 3 | 527.60  | 458.63  | 19.11  | o |
| 1854 | 2 | -9  | -18 | 3 | 4.36    | 3.18    | 3.18   | < |
| 1854 | 1 | 9   | 18  | 3 | 4.36    | 3.18    | 3.18   | < |
| 1855 | 2 | -10 | -18 | 3 | 262.49  | 248.42  | 12.74  | o |
| 1855 | 1 | 10  | 18  | 3 | 262.49  | 248.42  | 12.74  | o |
| 1856 | 2 | -11 | -18 | 3 | 32.15   | 44.59   | 6.37   | o |
| 1856 | 1 | 11  | 18  | 3 | 32.15   | 44.59   | 6.37   | o |
| 1857 | 2 | -12 | -18 | 3 | 21.55   | 31.85   | 6.37   | o |
| 1857 | 1 | 12  | 18  | 3 | 21.55   | 31.85   | 6.37   | o |
| 1858 | 2 | 11  | -19 | 3 | 108.03  | 95.55   | 9.55   | o |
| 1858 | 1 | -11 | 19  | 3 | 108.03  | 95.55   | 9.55   | o |
| 1859 | 2 | 10  | -19 | 3 | 388.62  | 299.38  | 92.36  | o |
| 1859 | 1 | -10 | 19  | 3 | 388.62  | 299.38  | 92.36  | o |

|      |   |     |     |   |         |         |        |   |
|------|---|-----|-----|---|---------|---------|--------|---|
| 1860 | 2 | 9   | -19 | 3 | 251.23  | 187.91  | 184.73 | < |
| 1860 | 1 | -9  | 19  | 3 | 251.23  | 187.91  | 184.73 | < |
| 1861 | 2 | 8   | -19 | 3 | 289.89  | 289.83  | 15.92  | o |
| 1861 | 1 | -8  | 19  | 3 | 289.89  | 289.83  | 15.92  | o |
| 1862 | 2 | 5   | -19 | 3 | 471.41  | 455.45  | 19.11  | o |
| 1862 | 1 | -5  | 19  | 3 | 471.41  | 455.45  | 19.11  | o |
| 1863 | 2 | 4   | -19 | 3 | 1368.98 | 1283.53 | 50.96  | o |
| 1863 | 1 | -4  | 19  | 3 | 1368.98 | 1283.53 | 50.96  | o |
| 1864 | 2 | 3   | -19 | 3 | 1925.66 | 2102.05 | 73.25  | o |
| 1864 | 1 | -3  | 19  | 3 | 1925.66 | 2102.05 | 73.25  | o |
| 1865 | 2 | 2   | -19 | 3 | 197.90  | 207.02  | 9.55   | o |
| 1865 | 1 | -2  | 19  | 3 | 197.90  | 207.02  | 9.55   | o |
| 1866 | 2 | 1   | -19 | 3 | 59.26   | 44.59   | 3.18   | o |
| 1866 | 1 | -1  | 19  | 3 | 59.26   | 44.59   | 3.18   | o |
| 1867 | 2 | -1  | -19 | 3 | 41.36   | 44.59   | 6.37   | o |
| 1867 | 1 | 1   | 19  | 3 | 41.36   | 44.59   | 6.37   | o |
| 1868 | 2 | -3  | -19 | 3 | 2044.09 | 1984.21 | 70.07  | o |
| 1868 | 1 | 3   | 19  | 3 | 2044.09 | 1984.21 | 70.07  | o |
| 1869 | 2 | -4  | -19 | 3 | 1205.86 | 1267.60 | 41.40  | o |
| 1869 | 1 | 4   | 19  | 3 | 1205.86 | 1267.60 | 41.40  | o |
| 1870 | 2 | -5  | -19 | 3 | 465.95  | 436.33  | 15.92  | o |
| 1870 | 1 | 5   | 19  | 3 | 465.95  | 436.33  | 15.92  | o |
| 1871 | 2 | -7  | -19 | 3 | 176.33  | 245.24  | 19.11  | o |
| 1871 | 1 | 7   | 19  | 3 | 176.33  | 245.24  | 19.11  | o |
| 1872 | 2 | -8  | -19 | 3 | 224.69  | 219.76  | 12.74  | o |
| 1872 | 1 | 8   | 19  | 3 | 224.69  | 219.76  | 12.74  | o |
| 1873 | 2 | -9  | -19 | 3 | 191.60  | 194.28  | 9.55   | o |
| 1873 | 1 | 9   | 19  | 3 | 191.60  | 194.28  | 9.55   | o |
| 1874 | 2 | -10 | -19 | 3 | 355.11  | 254.79  | 22.29  | o |
| 1874 | 1 | 10  | 19  | 3 | 355.11  | 254.79  | 22.29  | o |
| 1875 | 2 | -11 | -19 | 3 | 64.55   | 54.14   | 9.55   | o |
| 1875 | 1 | 11  | 19  | 3 | 64.55   | 54.14   | 9.55   | o |
| 1876 | 2 | 11  | -20 | 3 | 66.08   | 70.07   | 12.74  | o |
| 1876 | 1 | -11 | 20  | 3 | 66.08   | 70.07   | 12.74  | o |
| 1877 | 2 | 10  | -20 | 3 | 177.58  | 216.57  | 60.51  | o |
| 1877 | 1 | -10 | 20  | 3 | 177.58  | 216.57  | 60.51  | o |
| 1878 | 2 | 9   | -20 | 3 | 118.66  | 111.47  | 9.55   | o |
| 1878 | 1 | -9  | 20  | 3 | 118.66  | 111.47  | 9.55   | o |
| 1879 | 2 | 8   | -20 | 3 | 64.26   | 63.70   | 6.37   | o |
| 1879 | 1 | -8  | 20  | 3 | 64.26   | 63.70   | 6.37   | o |
| 1880 | 2 | 7   | -20 | 3 | 25.68   | 38.22   | 6.37   | o |
| 1880 | 1 | -7  | 20  | 3 | 25.68   | 38.22   | 6.37   | o |
| 1881 | 2 | 6   | -20 | 3 | 777.67  | 748.46  | 41.40  | o |
| 1881 | 1 | -6  | 20  | 3 | 777.67  | 748.46  | 41.40  | o |
| 1882 | 2 | 5   | -20 | 3 | 45.14   | 60.51   | 6.37   | o |
| 1882 | 1 | -5  | 20  | 3 | 45.14   | 60.51   | 6.37   | o |
| 1883 | 2 | 4   | -20 | 3 | 345.95  | 471.37  | 19.11  | o |
| 1883 | 1 | -4  | 20  | 3 | 345.95  | 471.37  | 19.11  | o |
| 1884 | 2 | 3   | -20 | 3 | 14.04   | 22.29   | 3.18   | o |
| 1884 | 1 | -3  | 20  | 3 | 14.04   | 22.29   | 3.18   | o |
| 1885 | 2 | 2   | -20 | 3 | 534.57  | 538.25  | 22.29  | o |
| 1885 | 1 | -2  | 20  | 3 | 534.57  | 538.25  | 22.29  | o |
| 1886 | 2 | 1   | -20 | 3 | 2.04    | 6.37    | 3.18   | < |
| 1886 | 1 | -1  | 20  | 3 | 2.04    | 6.37    | 3.18   | < |
| 1887 | 2 | 0   | -20 | 3 | 394.09  | 379.01  | 15.92  | o |
| 1887 | 1 | 0   | 20  | 3 | 394.09  | 379.01  | 15.92  | o |
| 1888 | 2 | -1  | -20 | 3 | 1.20    | 6.37    | 3.18   | < |
| 1888 | 1 | 1   | 20  | 3 | 1.20    | 6.37    | 3.18   | < |

|      |   |     |     |   |         |         |         |   |
|------|---|-----|-----|---|---------|---------|---------|---|
| 1889 | 2 | -2  | -20 | 3 | 634.91  | 611.51  | 22.29   | o |
| 1889 | 1 | 2   | 20  | 3 | 634.91  | 611.51  | 22.29   | o |
| 1890 | 2 | -3  | -20 | 3 | 26.39   | 31.85   | 3.18    | o |
| 1890 | 1 | 3   | 20  | 3 | 26.39   | 31.85   | 3.18    | o |
| 1891 | 2 | -4  | -20 | 3 | 764.22  | 732.53  | 25.48   | o |
| 1891 | 1 | 4   | 20  | 3 | 764.22  | 732.53  | 25.48   | o |
| 1892 | 2 | -5  | -20 | 3 | 80.85   | 85.99   | 6.37    | o |
| 1892 | 1 | 5   | 20  | 3 | 80.85   | 85.99   | 6.37    | o |
| 1893 | 2 | -6  | -20 | 3 | 669.46  | 684.76  | 35.03   | o |
| 1893 | 1 | 6   | 20  | 3 | 669.46  | 684.76  | 35.03   | o |
| 1894 | 2 | -7  | -20 | 3 | 81.65   | 82.81   | 6.37    | o |
| 1894 | 1 | 7   | 20  | 3 | 81.65   | 82.81   | 6.37    | o |
| 1895 | 2 | -8  | -20 | 3 | 115.81  | 101.92  | 6.37    | o |
| 1895 | 1 | 8   | 20  | 3 | 115.81  | 101.92  | 6.37    | o |
| 1896 | 2 | -9  | -20 | 3 | 65.19   | 57.33   | 6.37    | o |
| 1896 | 1 | 9   | 20  | 3 | 65.19   | 57.33   | 6.37    | o |
| 1897 | 2 | -10 | -20 | 3 | 105.85  | 133.77  | 12.74   | o |
| 1897 | 1 | 10  | 20  | 3 | 105.85  | 133.77  | 12.74   | o |
| 1898 | 2 | 10  | -21 | 3 | 136.64  | 213.39  | 22.29   | o |
| 1898 | 1 | -10 | 21  | 3 | 136.64  | 213.39  | 22.29   | o |
| 1899 | 2 | 9   | -21 | 3 | 137.10  | 156.06  | 1162.50 | < |
| 1899 | 1 | -9  | 21  | 3 | 137.10  | 156.06  | 1162.50 | < |
| 1900 | 2 | 8   | -21 | 3 | 1398.03 | 1258.05 | 79.62   | o |
| 1900 | 1 | -8  | 21  | 3 | 1398.03 | 1258.05 | 79.62   | o |
| 1901 | 2 | 7   | -21 | 3 | 1598.98 | 1487.36 | 57.33   | o |
| 1901 | 1 | -7  | 21  | 3 | 1598.98 | 1487.36 | 57.33   | o |
| 1902 | 2 | 6   | -21 | 3 | 222.74  | 232.50  | 12.74   | o |
| 1902 | 1 | -6  | 21  | 3 | 222.74  | 232.50  | 12.74   | o |
| 1903 | 2 | 5   | -21 | 3 | 1938.91 | 2194.41 | 89.18   | o |
| 1903 | 1 | -5  | 21  | 3 | 1938.91 | 2194.41 | 89.18   | o |
| 1904 | 2 | 4   | -21 | 3 | 2249.84 | 2496.98 | 79.62   | o |
| 1904 | 1 | -4  | 21  | 3 | 2249.84 | 2496.98 | 79.62   | o |
| 1905 | 2 | 3   | -21 | 3 | 106.22  | 140.14  | 6.37    | o |
| 1905 | 1 | -3  | 21  | 3 | 106.22  | 140.14  | 6.37    | o |
| 1906 | 2 | 2   | -21 | 3 | 220.78  | 245.24  | 12.74   | o |
| 1906 | 1 | -2  | 21  | 3 | 220.78  | 245.24  | 12.74   | o |
| 1907 | 2 | 1   | -21 | 3 | 395.75  | 296.20  | 12.74   | o |
| 1907 | 1 | -1  | 21  | 3 | 395.75  | 296.20  | 12.74   | o |
| 1908 | 2 | 0   | -21 | 3 | 42.94   | 57.33   | 6.37    | o |
| 1908 | 1 | 0   | 21  | 3 | 42.94   | 57.33   | 6.37    | o |
| 1909 | 2 | -3  | -21 | 3 | 140.07  | 162.43  | 9.55    | o |
| 1909 | 1 | 3   | 21  | 3 | 140.07  | 162.43  | 9.55    | o |
| 1910 | 2 | -4  | -21 | 3 | 2947.12 | 2853.69 | 89.18   | o |
| 1910 | 1 | 4   | 21  | 3 | 2947.12 | 2853.69 | 89.18   | o |
| 1911 | 2 | -5  | -21 | 3 | 3281.33 | 2853.69 | 89.18   | o |
| 1911 | 1 | 5   | 21  | 3 | 3281.33 | 2853.69 | 89.18   | o |
| 1912 | 2 | -6  | -21 | 3 | 130.93  | 159.25  | 9.55    | o |
| 1912 | 1 | 6   | 21  | 3 | 130.93  | 159.25  | 9.55    | o |
| 1913 | 2 | -7  | -21 | 3 | 1513.82 | 1375.89 | 47.77   | o |
| 1913 | 1 | 7   | 21  | 3 | 1513.82 | 1375.89 | 47.77   | o |
| 1914 | 2 | -8  | -21 | 3 | 1503.26 | 1264.42 | 50.96   | o |
| 1914 | 1 | 8   | 21  | 3 | 1503.26 | 1264.42 | 50.96   | o |
| 1915 | 2 | -9  | -21 | 3 | 217.44  | 184.73  | 12.74   | o |
| 1915 | 1 | 9   | 21  | 3 | 217.44  | 184.73  | 12.74   | o |
| 1916 | 2 | 9   | -22 | 3 | 60.50   | 57.33   | 12.74   | o |
| 1916 | 1 | -9  | 22  | 3 | 60.50   | 57.33   | 12.74   | o |
| 1917 | 2 | 8   | -22 | 3 | 349.19  | 261.16  | 19.11   | o |
| 1917 | 1 | -8  | 22  | 3 | 349.19  | 261.16  | 19.11   | o |

|      |   |    |     |   |          |          |        |   |
|------|---|----|-----|---|----------|----------|--------|---|
| 1918 | 2 | 7  | -22 | 3 | 316.71   | 299.38   | 15.92  | o |
| 1918 | 1 | -7 | 22  | 3 | 316.71   | 299.38   | 15.92  | o |
| 1919 | 2 | 6  | -22 | 3 | 910.49   | 824.90   | 28.66  | o |
| 1919 | 1 | -6 | 22  | 3 | 910.49   | 824.90   | 28.66  | o |
| 1920 | 2 | 5  | -22 | 3 | 73.89    | 82.81    | 6.37   | o |
| 1920 | 1 | -5 | 22  | 3 | 73.89    | 82.81    | 6.37   | o |
| 1921 | 2 | 4  | -22 | 3 | 3150.57  | 3388.76  | 105.10 | o |
| 1921 | 1 | -4 | 22  | 3 | 3150.57  | 3388.76  | 105.10 | o |
| 1922 | 2 | 1  | -22 | 3 | 386.27   | 321.68   | 12.74  | o |
| 1922 | 1 | -1 | 22  | 3 | 386.27   | 321.68   | 12.74  | o |
| 1923 | 2 | 0  | -22 | 3 | 1074.89  | 1057.40  | 35.03  | o |
| 1923 | 1 | 0  | 22  | 3 | 1074.89  | 1057.40  | 35.03  | o |
| 1924 | 2 | -1 | -22 | 3 | 244.86   | 280.27   | 12.74  | o |
| 1924 | 1 | 1  | 22  | 3 | 244.86   | 280.27   | 12.74  | o |
| 1925 | 2 | -3 | -22 | 3 | 21.69    | 50.96    | 6.37   | o |
| 1925 | 1 | 3  | 22  | 3 | 21.69    | 50.96    | 6.37   | o |
| 1926 | 2 | -4 | -22 | 3 | 3200.10  | 3471.57  | 108.29 | o |
| 1926 | 1 | 4  | 22  | 3 | 3200.10  | 3471.57  | 108.29 | o |
| 1927 | 2 | -5 | -22 | 3 | 20.05    | 57.33    | 6.37   | o |
| 1927 | 1 | 5  | 22  | 3 | 20.05    | 57.33    | 6.37   | o |
| 1928 | 2 | -6 | -22 | 3 | 510.01   | 531.88   | 22.29  | o |
| 1928 | 1 | 6  | 22  | 3 | 510.01   | 531.88   | 22.29  | o |
| 1929 | 2 | -7 | -22 | 3 | 77.23    | 117.84   | 9.55   | o |
| 1929 | 1 | 7  | 22  | 3 | 77.23    | 117.84   | 9.55   | o |
| 1930 | 2 | -8 | -22 | 3 | 580.71   | 509.59   | 19.11  | o |
| 1930 | 1 | 8  | 22  | 3 | 580.71   | 509.59   | 19.11  | o |
| 1931 | 2 | 8  | -23 | 3 | 354.84   | 347.16   | 31.85  | o |
| 1931 | 1 | -8 | 23  | 3 | 354.84   | 347.16   | 31.85  | o |
| 1932 | 2 | 7  | -23 | 3 | 993.72   | 767.57   | 28.66  | o |
| 1932 | 1 | -7 | 23  | 3 | 993.72   | 767.57   | 28.66  | o |
| 1933 | 2 | 6  | -23 | 3 | 393.10   | 547.81   | 22.29  | o |
| 1933 | 1 | -6 | 23  | 3 | 393.10   | 547.81   | 22.29  | o |
| 1934 | 2 | 5  | -23 | 3 | 2238.77  | 1987.39  | 63.70  | o |
| 1934 | 1 | -5 | 23  | 3 | 2238.77  | 1987.39  | 63.70  | o |
| 1935 | 2 | 4  | -23 | 3 | 11894.50 | 12545.40 | 382.19 | o |
| 1935 | 1 | -4 | 23  | 3 | 11894.50 | 12545.40 | 382.19 | o |
| 1936 | 2 | 3  | -23 | 3 | 916.79   | 990.51   | 38.22  | o |
| 1936 | 1 | -3 | 23  | 3 | 916.79   | 990.51   | 38.22  | o |
| 1937 | 2 | 2  | -23 | 3 | 1874.77  | 2019.24  | 63.70  | o |
| 1937 | 1 | -2 | 23  | 3 | 1874.77  | 2019.24  | 63.70  | o |
| 1938 | 2 | 1  | -23 | 3 | 2613.39  | 2911.02  | 92.36  | o |
| 1938 | 1 | -1 | 23  | 3 | 2613.39  | 2911.02  | 92.36  | o |
| 1939 | 2 | -1 | -23 | 3 | 3370.00  | 3270.92  | 117.84 | o |
| 1939 | 1 | 1  | 23  | 3 | 3370.00  | 3270.92  | 117.84 | o |
| 1940 | 2 | -2 | -23 | 3 | 2571.67  | 2353.66  | 76.44  | o |
| 1940 | 1 | 2  | 23  | 3 | 2571.67  | 2353.66  | 76.44  | o |
| 1941 | 2 | -3 | -23 | 3 | 1300.24  | 1133.83  | 44.59  | o |
| 1941 | 1 | 3  | 23  | 3 | 1300.24  | 1133.83  | 44.59  | o |
| 1942 | 2 | -4 | -23 | 3 | 11023.50 | 12312.90 | 375.82 | o |
| 1942 | 1 | 4  | 23  | 3 | 11023.50 | 12312.90 | 375.82 | o |
| 1943 | 2 | -5 | -23 | 3 | 1569.22  | 1602.02  | 54.14  | o |
| 1943 | 1 | 5  | 23  | 3 | 1569.22  | 1602.02  | 54.14  | o |
| 1944 | 2 | -6 | -23 | 3 | 465.65   | 605.14   | 22.29  | o |
| 1944 | 1 | 6  | 23  | 3 | 465.65   | 605.14   | 22.29  | o |
| 1945 | 2 | -7 | -23 | 3 | 980.03   | 824.90   | 28.66  | o |
| 1945 | 1 | 7  | 23  | 3 | 980.03   | 824.90   | 28.66  | o |
| 1946 | 2 | -8 | -23 | 3 | 451.35   | 385.38   | 22.29  | o |
| 1946 | 1 | 8  | 23  | 3 | 451.35   | 385.38   | 22.29  | o |

|      |   |    |     |   |         |         |       |   |
|------|---|----|-----|---|---------|---------|-------|---|
| 1947 | 2 | 7  | -24 | 3 | 71.99   | 82.81   | 9.55  | o |
| 1947 | 1 | -7 | 24  | 3 | 71.99   | 82.81   | 9.55  | o |
| 1948 | 2 | 6  | -24 | 3 | 405.83  | 366.27  | 19.11 | o |
| 1948 | 1 | -6 | 24  | 3 | 405.83  | 366.27  | 19.11 | o |
| 1949 | 2 | 5  | -24 | 3 | 139.10  | 124.21  | 9.55  | o |
| 1949 | 1 | -5 | 24  | 3 | 139.10  | 124.21  | 9.55  | o |
| 1950 | 2 | 4  | -24 | 3 | 237.00  | 216.57  | 12.74 | o |
| 1950 | 1 | -4 | 24  | 3 | 237.00  | 216.57  | 12.74 | o |
| 1951 | 2 | 3  | -24 | 3 | 272.29  | 232.50  | 12.74 | o |
| 1951 | 1 | -3 | 24  | 3 | 272.29  | 232.50  | 12.74 | o |
| 1952 | 2 | 2  | -24 | 3 | 229.50  | 226.13  | 12.74 | o |
| 1952 | 1 | -2 | 24  | 3 | 229.50  | 226.13  | 12.74 | o |
| 1953 | 2 | 1  | -24 | 3 | 1.02    | 3.18    | 3.18  | < |
| 1953 | 1 | -1 | 24  | 3 | 1.02    | 3.18    | 3.18  | < |
| 1954 | 2 | 0  | -24 | 3 | 413.15  | 343.97  | 15.92 | o |
| 1954 | 1 | 0  | 24  | 3 | 413.15  | 343.97  | 15.92 | o |
| 1955 | 2 | -1 | -24 | 3 | 1.95    | 6.37    | 3.18  | < |
| 1955 | 1 | 1  | 24  | 3 | 1.95    | 6.37    | 3.18  | < |
| 1956 | 2 | -2 | -24 | 3 | 254.66  | 248.42  | 12.74 | o |
| 1956 | 1 | 2  | 24  | 3 | 254.66  | 248.42  | 12.74 | o |
| 1957 | 2 | -3 | -24 | 3 | 272.33  | 270.72  | 12.74 | o |
| 1957 | 1 | 3  | 24  | 3 | 272.33  | 270.72  | 12.74 | o |
| 1958 | 2 | -4 | -24 | 3 | 122.15  | 159.25  | 9.55  | o |
| 1958 | 1 | 4  | 24  | 3 | 122.15  | 159.25  | 9.55  | o |
| 1959 | 2 | -5 | -24 | 3 | 107.97  | 114.66  | 9.55  | o |
| 1959 | 1 | 5  | 24  | 3 | 107.97  | 114.66  | 9.55  | o |
| 1960 | 2 | -6 | -24 | 3 | 340.68  | 321.68  | 22.29 | o |
| 1960 | 1 | 6  | 24  | 3 | 340.68  | 321.68  | 22.29 | o |
| 1961 | 2 | -7 | -24 | 3 | 42.48   | 38.22   | 9.55  | o |
| 1961 | 1 | 7  | 24  | 3 | 42.48   | 38.22   | 9.55  | o |
| 1962 | 2 | 7  | -25 | 3 | 134.03  | 111.47  | 19.11 | o |
| 1962 | 1 | -7 | 25  | 3 | 134.03  | 111.47  | 19.11 | o |
| 1963 | 2 | 6  | -25 | 3 | 460.44  | 477.74  | 41.40 | o |
| 1963 | 1 | -6 | 25  | 3 | 460.44  | 477.74  | 41.40 | o |
| 1964 | 2 | 5  | -25 | 3 | 88.61   | 89.18   | 9.55  | o |
| 1964 | 1 | -5 | 25  | 3 | 88.61   | 89.18   | 9.55  | o |
| 1965 | 2 | 4  | -25 | 3 | 1017.01 | 901.33  | 31.85 | o |
| 1965 | 1 | -4 | 25  | 3 | 1017.01 | 901.33  | 31.85 | o |
| 1966 | 2 | 3  | -25 | 3 | 876.33  | 949.11  | 47.77 | o |
| 1966 | 1 | -3 | 25  | 3 | 876.33  | 949.11  | 47.77 | o |
| 1967 | 2 | 2  | -25 | 3 | 667.79  | 633.80  | 28.66 | o |
| 1967 | 1 | -2 | 25  | 3 | 667.79  | 633.80  | 28.66 | o |
| 1968 | 2 | 1  | -25 | 3 | 546.01  | 404.49  | 15.92 | o |
| 1968 | 1 | -1 | 25  | 3 | 546.01  | 404.49  | 15.92 | o |
| 1969 | 2 | 0  | -25 | 3 | 3.30    | 19.11   | 3.18  | o |
| 1969 | 1 | 0  | 25  | 3 | 3.30    | 19.11   | 3.18  | o |
| 1970 | 2 | -3 | -25 | 3 | 1138.09 | 1079.69 | 38.22 | o |
| 1970 | 1 | 3  | 25  | 3 | 1138.09 | 1079.69 | 38.22 | o |
| 1971 | 2 | -4 | -25 | 3 | 940.39  | 910.89  | 31.85 | o |
| 1971 | 1 | 4  | 25  | 3 | 940.39  | 910.89  | 31.85 | o |
| 1972 | 2 | -5 | -25 | 3 | 68.63   | 82.81   | 9.55  | o |
| 1972 | 1 | 5  | 25  | 3 | 68.63   | 82.81   | 9.55  | o |
| 1973 | 2 | -6 | -25 | 3 | 249.77  | 242.05  | 22.29 | o |
| 1973 | 1 | 6  | 25  | 3 | 249.77  | 242.05  | 22.29 | o |
| 1974 | 2 | -7 | -25 | 3 | 309.92  | 200.65  | 19.11 | o |
| 1974 | 1 | 7  | 25  | 3 | 309.92  | 200.65  | 19.11 | o |
| 1975 | 2 | 6  | -26 | 3 | 24.98   | 44.59   | 9.55  | o |
| 1975 | 1 | -6 | 26  | 3 | 24.98   | 44.59   | 9.55  | o |



|      |   |    |     |   |          |          |        |   |
|------|---|----|-----|---|----------|----------|--------|---|
| 1976 | 2 | 5  | -26 | 3 | 206.21   | 210.21   | 15.92  | o |
| 1976 | 1 | -5 | 26  | 3 | 206.21   | 210.21   | 15.92  | o |
| 1977 | 2 | 4  | -26 | 3 | 318.85   | 267.53   | 19.11  | o |
| 1977 | 1 | -4 | 26  | 3 | 318.85   | 267.53   | 19.11  | o |
| 1978 | 2 | 3  | -26 | 3 | 26.66    | 44.59    | 6.37   | o |
| 1978 | 1 | -3 | 26  | 3 | 26.66    | 44.59    | 6.37   | o |
| 1979 | 2 | 2  | -26 | 3 | 1326.98  | 1547.87  | 50.96  | o |
| 1979 | 1 | -2 | 26  | 3 | 1326.98  | 1547.87  | 50.96  | o |
| 1980 | 2 | 1  | -26 | 3 | 106.45   | 98.73    | 6.37   | o |
| 1980 | 1 | -1 | 26  | 3 | 106.45   | 98.73    | 6.37   | o |
| 1981 | 2 | 0  | -26 | 3 | 293.69   | 277.09   | 12.74  | o |
| 1981 | 1 | 0  | 26  | 3 | 293.69   | 277.09   | 12.74  | o |
| 1982 | 2 | -1 | -26 | 3 | 59.55    | 70.07    | 6.37   | o |
| 1982 | 1 | 1  | 26  | 3 | 59.55    | 70.07    | 6.37   | o |
| 1983 | 2 | -2 | -26 | 3 | 1845.93  | 1824.96  | 60.51  | o |
| 1983 | 1 | 2  | 26  | 3 | 1845.93  | 1824.96  | 60.51  | o |
| 1984 | 2 | -3 | -26 | 3 | 106.98   | 92.36    | 9.55   | o |
| 1984 | 1 | 3  | 26  | 3 | 106.98   | 92.36    | 9.55   | o |
| 1985 | 2 | -4 | -26 | 3 | 256.07   | 229.32   | 15.92  | o |
| 1985 | 1 | 4  | 26  | 3 | 256.07   | 229.32   | 15.92  | o |
| 1986 | 2 | -5 | -26 | 3 | 51.37    | 63.70    | 6.37   | o |
| 1986 | 1 | 5  | 26  | 3 | 51.37    | 63.70    | 6.37   | o |
| 1987 | 2 | -6 | -26 | 3 | 86.07    | 95.55    | 9.55   | o |
| 1987 | 1 | 6  | 26  | 3 | 86.07    | 95.55    | 9.55   | o |
| 1988 | 2 | 6  | -27 | 3 | 707.67   | 621.06   | 44.59  | o |
| 1988 | 1 | -6 | 27  | 3 | 707.67   | 621.06   | 44.59  | o |
| 1989 | 2 | 5  | -27 | 3 | 1160.06  | 996.88   | 50.96  | o |
| 1989 | 1 | -5 | 27  | 3 | 1160.06  | 996.88   | 50.96  | o |
| 1990 | 2 | 4  | -27 | 3 | 683.59   | 525.51   | 28.66  | o |
| 1990 | 1 | -4 | 27  | 3 | 683.59   | 525.51   | 28.66  | o |
| 1991 | 2 | 3  | -27 | 3 | 73.66    | 105.10   | 9.55   | o |
| 1991 | 1 | -3 | 27  | 3 | 73.66    | 105.10   | 9.55   | o |
| 1992 | 2 | 2  | -27 | 3 | 1338.08  | 1385.44  | 95.55  | o |
| 1992 | 1 | -2 | 27  | 3 | 1338.08  | 1385.44  | 95.55  | o |
| 1993 | 2 | 1  | -27 | 3 | 4625.64  | 5073.59  | 181.54 | o |
| 1993 | 1 | -1 | 27  | 3 | 4625.64  | 5073.59  | 181.54 | o |
| 1994 | 2 | -1 | -27 | 3 | 5887.08  | 5901.67  | 257.98 | o |
| 1994 | 1 | 1  | 27  | 3 | 5887.08  | 5901.67  | 257.98 | o |
| 1995 | 2 | -2 | -27 | 3 | 1776.59  | 1592.46  | 76.44  | o |
| 1995 | 1 | 2  | 27  | 3 | 1776.59  | 1592.46  | 76.44  | o |
| 1996 | 2 | -3 | -27 | 3 | 90.79    | 124.21   | 15.92  | o |
| 1996 | 1 | 3  | 27  | 3 | 90.79    | 124.21   | 15.92  | o |
| 1997 | 2 | -4 | -27 | 3 | 455.14   | 388.56   | 22.29  | o |
| 1997 | 1 | 4  | 27  | 3 | 455.14   | 388.56   | 22.29  | o |
| 1998 | 2 | -5 | -27 | 3 | 802.09   | 652.91   | 35.03  | o |
| 1998 | 1 | 5  | 27  | 3 | 802.09   | 652.91   | 35.03  | o |
| 1999 | 2 | -6 | -27 | 3 | 514.46   | 458.63   | 28.66  | o |
| 1999 | 1 | 6  | 27  | 3 | 514.46   | 458.63   | 28.66  | o |
| 2000 | 2 | 5  | -28 | 3 | 22.69    | 12.74    | 6.37   | < |
| 2000 | 1 | -5 | 28  | 3 | 22.69    | 12.74    | 6.37   | < |
| 2001 | 2 | 4  | -28 | 3 | 597.96   | 506.40   | 44.59  | o |
| 2001 | 1 | -4 | 28  | 3 | 597.96   | 506.40   | 44.59  | o |
| 2002 | 2 | 3  | -28 | 3 | 424.14   | 353.53   | 35.03  | o |
| 2002 | 1 | -3 | 28  | 3 | 424.14   | 353.53   | 35.03  | o |
| 2003 | 2 | 2  | -28 | 3 | 472.95   | 388.56   | 35.03  | o |
| 2003 | 1 | -2 | 28  | 3 | 472.95   | 388.56   | 35.03  | o |
| 2004 | 1 | -8 | 0   | 4 | 5941.49  | 5372.97  | 229.32 | o |
| 2005 | 1 | -7 | 0   | 4 | 12416.70 | 12956.30 | 554.18 | o |

|      |   |     |   |   |           |           |         |   |
|------|---|-----|---|---|-----------|-----------|---------|---|
| 2006 | 1 | -6  | 0 | 4 | 20377.90  | 21877.30  | 933.18  | o |
| 2007 | 1 | -5  | 0 | 4 | 4096.90   | 3621.26   | 181.54  | o |
| 2008 | 1 | -4  | 0 | 4 | 63215.40  | 65252.80  | 2777.26 | o |
| 2009 | 1 | -3  | 0 | 4 | 28162.70  | 26842.60  | 1149.76 | o |
| 2010 | 1 | -2  | 0 | 4 | 31072.10  | 30715.40  | 1312.19 | o |
| 2011 | 1 | -1  | 0 | 4 | 69832.30  | 70230.80  | 2990.65 | o |
| 2012 | 1 | 0   | 0 | 4 | 165007.00 | 140156.00 | 5965.37 | o |
| 2013 | 1 | 1   | 0 | 4 | 82030.00  | 78081.70  | 3325.06 | o |
| 2014 | 1 | 2   | 0 | 4 | 30885.20  | 30129.40  | 1286.71 | o |
| 2015 | 1 | 3   | 0 | 4 | 24787.10  | 24625.90  | 1054.21 | o |
| 2016 | 1 | 4   | 0 | 4 | 48347.00  | 54411.30  | 2312.26 | o |
| 2017 | 1 | 5   | 0 | 4 | 6532.68   | 5943.07   | 254.79  | o |
| 2018 | 1 | 6   | 0 | 4 | 26244.00  | 29807.70  | 1465.07 | o |
| 2019 | 1 | 7   | 0 | 4 | 9142.43   | 11172.70  | 678.39  | o |
| 2020 | 1 | 8   | 0 | 4 | 1764.70   | 1535.13   | 219.76  | o |
| 2021 | 1 | 9   | 0 | 4 | 478.82    | 229.32    | 350.34  | < |
| 2022 | 1 | 10  | 0 | 4 | 4474.58   | 4130.85   | 245.24  | o |
| 2023 | 1 | 11  | 0 | 4 | 81.22     | 70.07     | 9.55    | o |
| 2024 | 1 | 12  | 0 | 4 | 1433.76   | 1560.61   | 70.07   | o |
| 2025 | 1 | -9  | 1 | 4 | 8.14      | 12.74     | 3.18    | o |
| 2026 | 1 | -8  | 1 | 4 | 639.87    | 633.80    | 22.29   | o |
| 2027 | 1 | -7  | 1 | 4 | 1090.58   | 1117.91   | 35.03   | o |
| 2028 | 1 | -6  | 1 | 4 | 2150.45   | 2188.04   | 66.88   | o |
| 2029 | 1 | -5  | 1 | 4 | 71.35     | 73.25     | 3.18    | o |
| 2030 | 1 | -4  | 1 | 4 | 114.33    | 98.73     | 6.37    | o |
| 2031 | 1 | -3  | 1 | 4 | 578.58    | 656.09    | 22.29   | o |
| 2032 | 1 | 1   | 1 | 4 | 391.34    | 461.81    | 15.92   | o |
| 2033 | 1 | 2   | 1 | 4 | 2385.93   | 2031.98   | 63.70   | o |
| 2034 | 1 | 3   | 1 | 4 | 1124.15   | 1047.84   | 31.85   | o |
| 2035 | 1 | 4   | 1 | 4 | 735.70    | 780.31    | 25.48   | o |
| 2036 | 1 | 5   | 1 | 4 | 34.25     | 28.66     | 3.18    | o |
| 2037 | 1 | 6   | 1 | 4 | 696.98    | 745.27    | 31.85   | o |
| 2038 | 1 | 7   | 1 | 4 | 2049.08   | 2133.90   | 70.07   | o |
| 2039 | 1 | 8   | 1 | 4 | 714.61    | 617.88    | 60.51   | o |
| 2040 | 1 | 9   | 1 | 4 | 48.63     | 44.59     | 6.37    | o |
| 2041 | 1 | 10  | 1 | 4 | 310.14    | 248.42    | 191.10  | < |
| 2042 | 1 | 11  | 1 | 4 | 333.87    | 296.20    | 31.85   | o |
| 2043 | 1 | 12  | 1 | 4 | 20.36     | 31.85     | 6.37    | o |
| 2044 | 1 | 13  | 1 | 4 | 54.38     | 60.51     | 9.55    | o |
| 2045 | 1 | -10 | 2 | 4 | 1475.57   | 1522.40   | 124.21  | o |
| 2046 | 1 | -9  | 2 | 4 | 53.01     | 105.10    | 63.70   | < |
| 2047 | 1 | -8  | 2 | 4 | 4907.55   | 4678.66   | 200.65  | o |
| 2048 | 1 | -7  | 2 | 4 | 48.24     | 50.96     | 3.18    | o |
| 2049 | 1 | -6  | 2 | 4 | 361.01    | 366.27    | 12.74   | o |
| 2050 | 1 | -5  | 2 | 4 | 638.69    | 621.06    | 19.11   | o |
| 2051 | 1 | -4  | 2 | 4 | 2475.24   | 2487.43   | 76.44   | o |
| 2052 | 1 | -3  | 2 | 4 | 2834.35   | 3608.52   | 111.47  | o |
| 2053 | 1 | -2  | 2 | 4 | 6610.01   | 7064.17   | 213.39  | o |
| 2054 | 1 | -1  | 2 | 4 | 26818.00  | 28014.60  | 844.01  | o |
| 2055 | 1 | 0   | 2 | 4 | 8628.78   | 7694.78   | 235.68  | o |
| 2056 | 1 | 1   | 2 | 4 | 28830.70  | 27957.30  | 844.01  | o |
| 2057 | 1 | 2   | 2 | 4 | 8650.42   | 8051.50   | 245.24  | o |
| 2058 | 1 | 3   | 2 | 4 | 2048.41   | 2538.39   | 79.62   | o |
| 2059 | 1 | 4   | 2 | 4 | 2451.12   | 2315.44   | 73.25   | o |
| 2060 | 1 | 5   | 2 | 4 | 1138.98   | 1187.98   | 44.59   | o |
| 2061 | 1 | 6   | 2 | 4 | 610.90    | 611.51    | 22.29   | o |
| 2062 | 1 | 7   | 2 | 4 | 101.60    | 117.84    | 6.37    | o |
| 2063 | 1 | 8   | 2 | 4 | 3483.46   | 3853.76   | 121.03  | o |

|      |   |     |   |   |          |          |         |   |
|------|---|-----|---|---|----------|----------|---------|---|
| 2064 | 1 | 9   | 2 | 4 | 106.61   | 127.40   | 41.40   | o |
| 2065 | 1 | 10  | 2 | 4 | 1694.23  | 1637.05  | 73.25   | o |
| 2066 | 1 | 11  | 2 | 4 | 364.08   | 286.64   | 28.66   | o |
| 2067 | 1 | 12  | 2 | 4 | 176.48   | 181.54   | 12.74   | o |
| 2068 | 1 | 13  | 2 | 4 | 77.09    | 60.51    | 6.37    | o |
| 2069 | 1 | -10 | 3 | 4 | 1.16     | 3.18     | 9.55    | < |
| 2070 | 1 | -9  | 3 | 4 | 177.69   | 133.77   | 70.07   | < |
| 2071 | 1 | -8  | 3 | 4 | 62.89    | 70.07    | 6.37    | o |
| 2072 | 1 | -7  | 3 | 4 | 20.92    | 12.74    | 9.55    | < |
| 2073 | 1 | -6  | 3 | 4 | 50.00    | 44.59    | 9.55    | o |
| 2074 | 1 | -5  | 3 | 4 | 502.63   | 509.59   | 15.92   | o |
| 2075 | 1 | -4  | 3 | 4 | 106.97   | 117.84   | 6.37    | o |
| 2076 | 1 | -3  | 3 | 4 | 0.33     | 9.55     | 3.18    | o |
| 2077 | 1 | -1  | 3 | 4 | 0.84     | 3.18     | 3.18    | < |
| 2078 | 1 | 1   | 3 | 4 | 1.32     | 3.18     | 3.18    | < |
| 2079 | 1 | 2   | 3 | 4 | 103.09   | 136.95   | 6.37    | o |
| 2080 | 1 | 3   | 3 | 4 | 21.27    | 31.85    | 3.18    | o |
| 2081 | 1 | 4   | 3 | 4 | 148.82   | 171.99   | 9.55    | o |
| 2082 | 1 | 5   | 3 | 4 | 608.84   | 595.58   | 19.11   | o |
| 2083 | 1 | 6   | 3 | 4 | 192.76   | 168.80   | 6.37    | o |
| 2084 | 1 | 7   | 3 | 4 | 169.12   | 162.43   | 6.37    | o |
| 2085 | 1 | 8   | 3 | 4 | 84.46    | 63.70    | 6.37    | o |
| 2086 | 1 | 9   | 3 | 4 | 470.93   | 474.55   | 108.29  | o |
| 2087 | 1 | 10  | 3 | 4 | 4.66     | 6.37     | 3.18    | < |
| 2088 | 1 | 11  | 3 | 4 | 63.19    | 70.07    | 3.18    | o |
| 2089 | 1 | 12  | 3 | 4 | 167.98   | 178.36   | 15.92   | o |
| 2090 | 1 | 13  | 3 | 4 | 176.69   | 194.28   | 12.74   | o |
| 2091 | 1 | -11 | 4 | 4 | 90.07    | 85.99    | 6.37    | o |
| 2092 | 1 | -10 | 4 | 4 | 1276.69  | 1344.04  | 66.88   | o |
| 2093 | 1 | -9  | 4 | 4 | 1425.13  | 1461.88  | 63.70   | o |
| 2094 | 1 | -8  | 4 | 4 | 3686.37  | 3901.54  | 168.80  | o |
| 2095 | 1 | -7  | 4 | 4 | 1247.51  | 1420.48  | 44.59   | o |
| 2096 | 1 | -6  | 4 | 4 | 36142.90 | 36324.10 | 1092.43 | o |
| 2097 | 1 | -5  | 4 | 4 | 1690.94  | 2073.39  | 66.88   | o |
| 2098 | 1 | -4  | 4 | 4 | 16655.90 | 18800.60 | 566.92  | o |
| 2099 | 1 | -3  | 4 | 4 | 668.41   | 748.46   | 25.48   | o |
| 2100 | 1 | -2  | 4 | 4 | 8741.16  | 9526.12  | 289.83  | o |
| 2101 | 1 | -1  | 4 | 4 | 22395.30 | 23450.60 | 707.05  | o |
| 2102 | 1 | 0   | 4 | 4 | 4154.54  | 3337.80  | 117.84  | o |
| 2103 | 1 | 1   | 4 | 4 | 20231.00 | 21679.80 | 652.91  | o |
| 2104 | 1 | 2   | 4 | 4 | 7877.93  | 8561.08  | 261.16  | o |
| 2105 | 1 | 4   | 4 | 4 | 21639.30 | 22759.50 | 684.76  | o |
| 2106 | 1 | 5   | 4 | 4 | 2607.55  | 3022.50  | 92.36   | o |
| 2107 | 1 | 6   | 4 | 4 | 26921.20 | 28966.90 | 872.67  | o |
| 2108 | 1 | 7   | 4 | 4 | 1050.30  | 1382.26  | 50.96   | o |
| 2109 | 1 | 8   | 4 | 4 | 6453.34  | 6541.84  | 200.65  | o |
| 2110 | 1 | 9   | 4 | 4 | 878.00   | 844.01   | 512.77  | < |
| 2111 | 1 | 10  | 4 | 4 | 213.99   | 216.57   | 44.59   | o |
| 2112 | 1 | 11  | 4 | 4 | 124.76   | 105.10   | 12.74   | o |
| 2113 | 1 | 12  | 4 | 4 | 3786.74  | 4764.65  | 207.02  | o |
| 2114 | 1 | 13  | 4 | 4 | 685.94   | 770.75   | 44.59   | o |
| 2115 | 1 | -12 | 5 | 4 | 4.37     | 9.55     | 3.18    | o |
| 2116 | 1 | -11 | 5 | 4 | 133.26   | 143.32   | 9.55    | o |
| 2117 | 1 | -10 | 5 | 4 | 277.96   | 270.72   | 22.29   | o |
| 2118 | 1 | -9  | 5 | 4 | 746.20   | 700.68   | 35.03   | o |
| 2119 | 1 | -8  | 5 | 4 | 413.54   | 366.27   | 19.11   | o |
| 2120 | 1 | -7  | 5 | 4 | 136.13   | 127.40   | 6.37    | o |
| 2121 | 1 | -6  | 5 | 4 | 402.25   | 363.08   | 15.92   | o |

|      |   |     |   |   |          |          |         |   |
|------|---|-----|---|---|----------|----------|---------|---|
| 2122 | 1 | -5  | 5 | 4 | 2166.12  | 2554.31  | 92.36   | o |
| 2123 | 1 | -4  | 5 | 4 | 1736.34  | 1675.27  | 60.51   | o |
| 2124 | 1 | -3  | 5 | 4 | 203.07   | 194.28   | 9.55    | o |
| 2125 | 1 | -1  | 5 | 4 | 316.43   | 350.34   | 12.74   | o |
| 2126 | 1 | 0   | 5 | 4 | 423.24   | 525.51   | 19.11   | o |
| 2127 | 1 | 1   | 5 | 4 | 318.18   | 315.31   | 12.74   | o |
| 2128 | 1 | 2   | 5 | 4 | 424.95   | 452.26   | 19.11   | o |
| 2129 | 1 | 5   | 5 | 4 | 3239.44  | 3465.20  | 105.10  | o |
| 2130 | 1 | 6   | 5 | 4 | 1073.19  | 1044.66  | 38.22   | o |
| 2131 | 1 | 7   | 5 | 4 | 17.13    | 19.11    | 9.55    | < |
| 2132 | 1 | 8   | 5 | 4 | 203.78   | 187.91   | 15.92   | o |
| 2133 | 1 | 9   | 5 | 4 | 908.05   | 942.74   | 31.85   | o |
| 2134 | 1 | 10  | 5 | 4 | 229.90   | 213.39   | 38.22   | o |
| 2135 | 1 | 11  | 5 | 4 | 53.69    | 54.14    | 28.66   | < |
| 2136 | 1 | 12  | 5 | 4 | 8.20     | 3.18     | 3.18    | < |
| 2137 | 1 | 13  | 5 | 4 | 12.44    | 12.74    | 3.18    | o |
| 2138 | 1 | -12 | 6 | 4 | 559.58   | 742.09   | 35.03   | o |
| 2139 | 1 | -11 | 6 | 4 | 157.95   | 191.10   | 12.74   | o |
| 2140 | 1 | -10 | 6 | 4 | 2491.86  | 2592.53  | 264.35  | o |
| 2141 | 1 | -9  | 6 | 4 | 2499.81  | 2678.52  | 165.62  | o |
| 2142 | 1 | -8  | 6 | 4 | 1312.57  | 1337.67  | 60.51   | o |
| 2143 | 1 | -6  | 6 | 4 | 5098.27  | 4907.97  | 149.69  | o |
| 2144 | 1 | -5  | 6 | 4 | 765.02   | 799.42   | 25.48   | o |
| 2145 | 1 | -4  | 6 | 4 | 26305.30 | 29769.50 | 894.97  | o |
| 2146 | 1 | -3  | 6 | 4 | 10495.70 | 12459.40 | 436.33  | o |
| 2147 | 1 | -2  | 6 | 4 | 13778.90 | 15634.80 | 547.81  | o |
| 2148 | 1 | 0   | 6 | 4 | 24460.40 | 31737.80 | 1108.35 | o |
| 2149 | 1 | 2   | 6 | 4 | 13626.20 | 14478.70 | 439.52  | o |
| 2150 | 1 | 3   | 6 | 4 | 13912.90 | 14020.00 | 426.78  | o |
| 2151 | 1 | 4   | 6 | 4 | 26878.80 | 28597.50 | 866.30  | o |
| 2152 | 1 | 5   | 6 | 4 | 738.56   | 729.35   | 35.03   | o |
| 2153 | 1 | 6   | 6 | 4 | 1474.76  | 1627.50  | 66.88   | o |
| 2154 | 1 | 7   | 6 | 4 | 202.50   | 171.99   | 9.55    | o |
| 2155 | 1 | 8   | 6 | 4 | 2280.61  | 2350.48  | 73.25   | o |
| 2156 | 1 | 9   | 6 | 4 | 1657.35  | 1735.79  | 245.24  | o |
| 2157 | 1 | 10  | 6 | 4 | 1345.74  | 1203.90  | 76.44   | o |
| 2158 | 1 | 11  | 6 | 4 | 32.44    | 31.85    | 22.29   | < |
| 2159 | 1 | 12  | 6 | 4 | 62.46    | 98.73    | 41.40   | < |
| 2160 | 1 | 13  | 6 | 4 | 1409.01  | 1824.96  | 85.99   | o |
| 2161 | 1 | -12 | 7 | 4 | 162.77   | 203.84   | 15.92   | o |
| 2162 | 1 | -11 | 7 | 4 | 4.69     | 0.00     | 3.18    | < |
| 2163 | 1 | -10 | 7 | 4 | 209.26   | 226.13   | 76.44   | < |
| 2164 | 1 | -9  | 7 | 4 | 696.33   | 697.50   | 38.22   | o |
| 2165 | 1 | -8  | 7 | 4 | 582.40   | 560.55   | 28.66   | o |
| 2166 | 1 | -7  | 7 | 4 | 120.22   | 140.14   | 6.37    | o |
| 2167 | 1 | -6  | 7 | 4 | 1025.81  | 1117.91  | 41.40   | o |
| 2168 | 1 | -5  | 7 | 4 | 45.30    | 63.70    | 6.37    | o |
| 2169 | 1 | -4  | 7 | 4 | 2.16     | 6.37     | 3.18    | < |
| 2170 | 1 | -2  | 7 | 4 | 377.00   | 449.08   | 15.92   | o |
| 2171 | 1 | -1  | 7 | 4 | 720.88   | 649.72   | 22.29   | o |
| 2172 | 1 | 0   | 7 | 4 | 26.11    | 47.77    | 6.37    | o |
| 2173 | 1 | 2   | 7 | 4 | 435.95   | 449.08   | 19.11   | o |
| 2174 | 1 | 3   | 7 | 4 | 137.05   | 146.51   | 9.55    | o |
| 2175 | 1 | 4   | 7 | 4 | 24.21    | 28.66    | 3.18    | o |
| 2176 | 1 | 5   | 7 | 4 | 162.22   | 191.10   | 9.55    | o |
| 2177 | 1 | 6   | 7 | 4 | 562.54   | 503.22   | 25.48   | o |
| 2178 | 1 | 7   | 7 | 4 | 571.96   | 566.92   | 22.29   | o |
| 2179 | 1 | 8   | 7 | 4 | 535.37   | 522.33   | 28.66   | o |

|      |   |     |    |   |          |          |        |   |
|------|---|-----|----|---|----------|----------|--------|---|
| 2180 | 1 | 9   | 7  | 4 | 1082.57  | 1108.35  | 35.03  | o |
| 2181 | 1 | 10  | 7  | 4 | 131.59   | 124.21   | 12.74  | o |
| 2182 | 1 | 11  | 7  | 4 | 17.41    | 15.92    | 6.37   | < |
| 2183 | 1 | 12  | 7  | 4 | 40.86    | 54.14    | 6.37   | o |
| 2184 | 1 | 13  | 7  | 4 | 22.95    | 28.66    | 9.55   | < |
| 2185 | 1 | -12 | 8  | 4 | 7054.51  | 10386.00 | 480.92 | o |
| 2186 | 1 | -11 | 8  | 4 | 198.61   | 242.05   | 146.51 | < |
| 2187 | 1 | -10 | 8  | 4 | 439.21   | 398.12   | 130.58 | o |
| 2188 | 1 | -9  | 8  | 4 | 1057.31  | 1015.99  | 47.77  | o |
| 2189 | 1 | -8  | 8  | 4 | 6158.39  | 6181.94  | 267.53 | o |
| 2190 | 1 | -7  | 8  | 4 | 2886.80  | 3092.56  | 95.55  | o |
| 2191 | 1 | -6  | 8  | 4 | 15949.10 | 17791.00 | 535.07 | o |
| 2192 | 1 | -5  | 8  | 4 | 6283.76  | 7178.83  | 216.57 | o |
| 2193 | 1 | -4  | 8  | 4 | 3620.88  | 4051.23  | 143.32 | o |
| 2194 | 1 | -3  | 8  | 4 | 68.22    | 79.62    | 6.37   | o |
| 2195 | 1 | -2  | 8  | 4 | 10986.10 | 14644.30 | 512.77 | o |
| 2196 | 1 | 0   | 8  | 4 | 3112.84  | 2643.49  | 82.81  | o |
| 2197 | 1 | 2   | 8  | 4 | 12340.90 | 14730.30 | 515.96 | o |
| 2198 | 1 | 4   | 8  | 4 | 2881.25  | 3512.97  | 108.29 | o |
| 2199 | 1 | 5   | 8  | 4 | 6708.79  | 7318.96  | 222.95 | o |
| 2200 | 1 | 6   | 8  | 4 | 18557.30 | 19221.00 | 579.66 | o |
| 2201 | 1 | 7   | 8  | 4 | 3441.40  | 3637.19  | 121.03 | o |
| 2202 | 1 | 8   | 8  | 4 | 3633.20  | 3586.23  | 181.54 | o |
| 2203 | 1 | 9   | 8  | 4 | 834.60   | 914.07   | 35.03  | o |
| 2204 | 1 | 10  | 8  | 4 | 1042.58  | 1111.54  | 38.22  | o |
| 2205 | 1 | 11  | 8  | 4 | 262.42   | 289.83   | 22.29  | o |
| 2206 | 1 | 12  | 8  | 4 | 6089.36  | 8315.84  | 414.04 | o |
| 2207 | 1 | 13  | 8  | 4 | 31.91    | 60.51    | 12.74  | o |
| 2208 | 1 | -12 | 9  | 4 | 221.43   | 280.27   | 19.11  | o |
| 2209 | 1 | -11 | 9  | 4 | 75.11    | 85.99    | 79.62  | < |
| 2210 | 1 | -10 | 9  | 4 | 1.64     | 0.00     | 3.18   | < |
| 2211 | 1 | -9  | 9  | 4 | 17.43    | 19.11    | 3.18   | o |
| 2212 | 1 | -8  | 9  | 4 | 136.35   | 130.58   | 9.55   | o |
| 2213 | 1 | -7  | 9  | 4 | 1080.42  | 1038.29  | 35.03  | o |
| 2214 | 1 | -6  | 9  | 4 | 115.17   | 108.29   | 6.37   | o |
| 2215 | 1 | -5  | 9  | 4 | 236.56   | 235.68   | 9.55   | o |
| 2216 | 1 | -4  | 9  | 4 | 32.64    | 73.25    | 6.37   | o |
| 2217 | 1 | -3  | 9  | 4 | 667.99   | 649.72   | 25.48  | o |
| 2218 | 1 | -1  | 9  | 4 | 4.00     | 3.18     | 3.18   | < |
| 2219 | 1 | 0   | 9  | 4 | 247.13   | 321.68   | 12.74  | o |
| 2220 | 1 | 1   | 9  | 4 | 3.34     | 3.18     | 3.18   | < |
| 2221 | 1 | 2   | 9  | 4 | 799.64   | 1022.36  | 35.03  | o |
| 2222 | 1 | 4   | 9  | 4 | 223.73   | 178.36   | 9.55   | o |
| 2223 | 1 | 6   | 9  | 4 | 28.13    | 50.96    | 3.18   | o |
| 2224 | 1 | 7   | 9  | 4 | 1323.54  | 1334.48  | 44.59  | o |
| 2225 | 1 | 8   | 9  | 4 | 563.85   | 560.55   | 22.29  | o |
| 2226 | 1 | 9   | 9  | 4 | 12.26    | 15.92    | 3.18   | o |
| 2227 | 1 | 10  | 9  | 4 | 12.34    | 9.55     | 3.18   | o |
| 2228 | 1 | 11  | 9  | 4 | 225.19   | 219.76   | 19.11  | o |
| 2229 | 1 | 12  | 9  | 4 | 25.61    | 35.03    | 6.37   | o |
| 2230 | 1 | 13  | 9  | 4 | 55.14    | 66.88    | 9.55   | o |
| 2231 | 1 | -12 | 10 | 4 | 183.79   | 248.42   | 31.85  | o |
| 2232 | 1 | -11 | 10 | 4 | 172.25   | 210.21   | 15.92  | o |
| 2233 | 1 | -10 | 10 | 4 | 357.17   | 394.93   | 171.99 | < |
| 2234 | 1 | -9  | 10 | 4 | 1023.18  | 879.04   | 44.59  | o |
| 2235 | 1 | -8  | 10 | 4 | 4045.18  | 4124.48  | 146.51 | o |
| 2236 | 1 | -7  | 10 | 4 | 1071.04  | 974.59   | 38.22  | o |
| 2237 | 1 | -6  | 10 | 4 | 1804.02  | 1799.48  | 79.62  | o |

|      |   |     |    |   |          |          |         |   |
|------|---|-----|----|---|----------|----------|---------|---|
| 2238 | 1 | -5  | 10 | 4 | 1014.45  | 1019.18  | 31.85   | o |
| 2239 | 1 | -4  | 10 | 4 | 14606.30 | 15634.80 | 547.81  | o |
| 2240 | 1 | -3  | 10 | 4 | 12648.40 | 15657.10 | 474.55  | o |
| 2241 | 1 | -1  | 10 | 4 | 495.14   | 487.29   | 19.11   | o |
| 2242 | 1 | 2   | 10 | 4 | 1416.46  | 1369.52  | 50.96   | o |
| 2243 | 1 | 3   | 10 | 4 | 12991.60 | 17354.70 | 608.32  | o |
| 2244 | 1 | 6   | 10 | 4 | 3978.31  | 3786.88  | 133.77  | o |
| 2245 | 1 | 7   | 10 | 4 | 269.47   | 455.45   | 60.51   | o |
| 2246 | 1 | 8   | 10 | 4 | 1443.57  | 1614.76  | 66.88   | o |
| 2247 | 1 | 9   | 10 | 4 | 843.52   | 863.11   | 38.22   | o |
| 2248 | 1 | 10  | 10 | 4 | 1444.42  | 1484.18  | 47.77   | o |
| 2249 | 1 | 11  | 10 | 4 | 50.57    | 70.07    | 12.74   | o |
| 2250 | 1 | 12  | 10 | 4 | 709.29   | 786.68   | 41.40   | o |
| 2251 | 1 | 13  | 10 | 4 | 50.00    | 66.88    | 15.92   | o |
| 2252 | 1 | -12 | 11 | 4 | 15.61    | 19.11    | 6.37    | o |
| 2253 | 1 | -11 | 11 | 4 | 49.17    | 60.51    | 9.55    | o |
| 2254 | 1 | -10 | 11 | 4 | 34.62    | 31.85    | 15.92   | < |
| 2255 | 1 | -9  | 11 | 4 | 11.32    | 12.74    | 3.18    | o |
| 2256 | 1 | -8  | 11 | 4 | 516.16   | 541.44   | 35.03   | o |
| 2257 | 1 | -7  | 11 | 4 | 1203.06  | 1356.78  | 44.59   | o |
| 2258 | 1 | -6  | 11 | 4 | 688.97   | 665.65   | 22.29   | o |
| 2259 | 1 | -4  | 11 | 4 | 11.05    | 3.18     | 3.18    | < |
| 2260 | 1 | -3  | 11 | 4 | 241.18   | 299.38   | 12.74   | o |
| 2261 | 1 | -1  | 11 | 4 | 1.47     | 9.55     | 3.18    | o |
| 2262 | 1 | 0   | 11 | 4 | 34.24    | 44.59    | 3.18    | o |
| 2263 | 1 | 1   | 11 | 4 | 8.11     | 15.92    | 3.18    | o |
| 2264 | 1 | 2   | 11 | 4 | 348.14   | 318.49   | 15.92   | o |
| 2265 | 1 | 3   | 11 | 4 | 395.44   | 398.12   | 15.92   | o |
| 2266 | 1 | 4   | 11 | 4 | 0.32     | 3.18     | 3.18    | < |
| 2267 | 1 | 5   | 11 | 4 | 270.62   | 226.13   | 9.55    | o |
| 2268 | 1 | 6   | 11 | 4 | 259.80   | 350.34   | 15.92   | o |
| 2269 | 1 | 7   | 11 | 4 | 1621.38  | 1802.67  | 66.88   | o |
| 2270 | 1 | 8   | 11 | 4 | 920.80   | 882.22   | 38.22   | o |
| 2271 | 1 | 9   | 11 | 4 | 1.36     | 9.55     | 3.18    | o |
| 2272 | 1 | 10  | 11 | 4 | 76.59    | 82.81    | 6.37    | o |
| 2273 | 1 | 11  | 11 | 4 | 1.77     | 6.37     | 3.18    | < |
| 2274 | 1 | 12  | 11 | 4 | 63.99    | 92.36    | 9.55    | o |
| 2275 | 1 | -12 | 12 | 4 | 2739.54  | 3497.05  | 238.87  | o |
| 2276 | 1 | -11 | 12 | 4 | 109.59   | 127.40   | 678.39  | < |
| 2277 | 1 | -10 | 12 | 4 | 1829.45  | 1831.33  | 85.99   | o |
| 2278 | 1 | -9  | 12 | 4 | 3888.83  | 4255.06  | 264.35  | o |
| 2279 | 1 | -8  | 12 | 4 | 2800.43  | 3016.13  | 92.36   | o |
| 2280 | 1 | -7  | 12 | 4 | 5274.50  | 5857.08  | 178.36  | o |
| 2281 | 1 | -6  | 12 | 4 | 11146.50 | 13166.50 | 461.81  | o |
| 2282 | 1 | -5  | 12 | 4 | 1869.40  | 2372.77  | 73.25   | o |
| 2283 | 1 | -4  | 12 | 4 | 10324.10 | 12832.10 | 449.08  | o |
| 2284 | 1 | -3  | 12 | 4 | 22931.40 | 27970.00 | 844.01  | o |
| 2285 | 1 | -2  | 12 | 4 | 17021.40 | 19756.10 | 598.77  | o |
| 2286 | 1 | -1  | 12 | 4 | 2912.32  | 3936.57  | 140.14  | o |
| 2287 | 1 | 0   | 12 | 4 | 43785.00 | 50914.20 | 1538.32 | o |
| 2288 | 1 | 1   | 12 | 4 | 3282.70  | 3888.80  | 121.03  | o |
| 2289 | 1 | 2   | 12 | 4 | 13995.30 | 17905.70 | 630.62  | o |
| 2290 | 1 | 3   | 12 | 4 | 21644.00 | 26829.80 | 815.34  | o |
| 2291 | 1 | 4   | 12 | 4 | 10809.90 | 13338.50 | 407.67  | o |
| 2292 | 1 | 5   | 12 | 4 | 2629.90  | 2754.96  | 85.99   | o |
| 2293 | 1 | 6   | 12 | 4 | 9682.05  | 11902.10 | 359.90  | o |
| 2294 | 1 | 7   | 12 | 4 | 4243.50  | 5478.07  | 238.87  | o |
| 2295 | 1 | 8   | 12 | 4 | 2157.34  | 2254.93  | 82.81   | o |

|      |   |     |    |   |          |          |        |   |
|------|---|-----|----|---|----------|----------|--------|---|
| 2296 | 1 | 9   | 12 | 4 | 3093.34  | 3541.64  | 156.06 | o |
| 2297 | 1 | 10  | 12 | 4 | 1740.90  | 1844.07  | 85.99  | o |
| 2298 | 1 | 11  | 12 | 4 | 266.55   | 293.01   | 19.11  | o |
| 2299 | 1 | 12  | 12 | 4 | 3008.17  | 4156.33  | 184.73 | o |
| 2300 | 1 | -12 | 13 | 4 | 90.61    | 127.40   | 12.74  | o |
| 2301 | 1 | -11 | 13 | 4 | 44.52    | 70.07    | 9.55   | o |
| 2302 | 1 | -10 | 13 | 4 | 661.16   | 707.05   | 394.93 | < |
| 2303 | 1 | -9  | 13 | 4 | 543.70   | 525.51   | 28.66  | o |
| 2304 | 1 | -8  | 13 | 4 | 286.93   | 328.05   | 12.74  | o |
| 2305 | 1 | -7  | 13 | 4 | 6.51     | 22.29    | 6.37   | o |
| 2306 | 1 | -6  | 13 | 4 | 345.05   | 426.78   | 15.92  | o |
| 2307 | 1 | -4  | 13 | 4 | 197.01   | 229.32   | 9.55   | o |
| 2308 | 1 | -3  | 13 | 4 | 287.08   | 280.27   | 12.74  | o |
| 2309 | 1 | -2  | 13 | 4 | 273.63   | 248.42   | 9.55   | o |
| 2310 | 1 | -1  | 13 | 4 | 1180.92  | 1324.93  | 44.59  | o |
| 2311 | 1 | 0   | 13 | 4 | 63.15    | 101.92   | 6.37   | o |
| 2312 | 1 | 3   | 13 | 4 | 154.39   | 203.84   | 9.55   | o |
| 2313 | 1 | 5   | 13 | 4 | 128.59   | 124.21   | 6.37   | o |
| 2314 | 1 | 6   | 13 | 4 | 812.80   | 812.16   | 31.85  | o |
| 2315 | 1 | 7   | 13 | 4 | 337.04   | 251.61   | 12.74  | o |
| 2316 | 1 | 8   | 13 | 4 | 77.32    | 95.55    | 15.92  | o |
| 2317 | 1 | 9   | 13 | 4 | 833.18   | 808.97   | 28.66  | o |
| 2318 | 1 | 10  | 13 | 4 | 268.70   | 245.24   | 57.33  | o |
| 2319 | 1 | 11  | 13 | 4 | 52.66    | 66.88    | 9.55   | o |
| 2320 | 1 | 12  | 13 | 4 | 195.04   | 235.68   | 15.92  | o |
| 2321 | 1 | -12 | 14 | 4 | 170.76   | 213.39   | 31.85  | o |
| 2322 | 1 | -11 | 14 | 4 | 252.43   | 385.38   | 31.85  | o |
| 2323 | 1 | -10 | 14 | 4 | 2089.01  | 2133.90  | 643.35 | o |
| 2324 | 1 | -9  | 14 | 4 | 1797.49  | 1882.29  | 280.27 | o |
| 2325 | 1 | -8  | 14 | 4 | 1167.28  | 1344.04  | 54.14  | o |
| 2326 | 1 | -7  | 14 | 4 | 209.43   | 203.84   | 9.55   | o |
| 2327 | 1 | -6  | 14 | 4 | 222.76   | 197.46   | 15.92  | o |
| 2328 | 1 | -5  | 14 | 4 | 1043.34  | 1101.98  | 35.03  | o |
| 2329 | 1 | -3  | 14 | 4 | 12263.60 | 14966.00 | 452.26 | o |
| 2330 | 1 | -2  | 14 | 4 | 6211.78  | 7373.11  | 226.13 | o |
| 2331 | 1 | -1  | 14 | 4 | 680.19   | 726.16   | 25.48  | o |
| 2332 | 1 | 0   | 14 | 4 | 1745.68  | 1796.30  | 57.33  | o |
| 2333 | 1 | 1   | 14 | 4 | 917.71   | 777.12   | 25.48  | o |
| 2334 | 1 | 2   | 14 | 4 | 5673.76  | 7207.49  | 219.76 | o |
| 2335 | 1 | 3   | 14 | 4 | 13377.90 | 15252.60 | 465.00 | o |
| 2336 | 1 | 4   | 14 | 4 | 1221.11  | 1133.83  | 38.22  | o |
| 2337 | 1 | 5   | 14 | 4 | 1215.05  | 1372.70  | 47.77  | o |
| 2338 | 1 | 7   | 14 | 4 | 78.51    | 140.14   | 9.55   | o |
| 2339 | 1 | 8   | 14 | 4 | 2563.94  | 2595.72  | 82.81  | o |
| 2340 | 1 | 9   | 14 | 4 | 1915.23  | 1961.92  | 73.25  | o |
| 2341 | 1 | 10  | 14 | 4 | 907.13   | 891.78   | 54.14  | o |
| 2342 | 1 | 11  | 14 | 4 | 234.78   | 286.64   | 41.40  | o |
| 2343 | 1 | 12  | 14 | 4 | 767.13   | 856.74   | 54.14  | o |
| 2344 | 1 | -12 | 15 | 4 | 31.43    | 47.77    | 9.55   | o |
| 2345 | 1 | -11 | 15 | 4 | 2.46     | 9.55     | 3.18   | o |
| 2346 | 1 | -10 | 15 | 4 | 0.59     | 3.18     | 3.18   | < |
| 2347 | 1 | -9  | 15 | 4 | 413.91   | 391.75   | 162.43 | < |
| 2348 | 1 | -8  | 15 | 4 | 232.82   | 210.21   | 15.92  | o |
| 2349 | 1 | -7  | 15 | 4 | 266.36   | 270.72   | 12.74  | o |
| 2350 | 1 | -5  | 15 | 4 | 226.73   | 213.39   | 9.55   | o |
| 2351 | 1 | -4  | 15 | 4 | 778.13   | 675.21   | 28.66  | o |
| 2352 | 1 | -3  | 15 | 4 | 172.63   | 127.40   | 6.37   | o |
| 2353 | 1 | -1  | 15 | 4 | 1131.78  | 1302.64  | 41.40  | o |

|      |   |     |    |   |          |          |        |   |
|------|---|-----|----|---|----------|----------|--------|---|
| 2354 | 1 | 1   | 15 | 4 | 981.66   | 1293.08  | 41.40  | o |
| 2355 | 1 | 2   | 15 | 4 | 81.25    | 76.44    | 6.37   | o |
| 2356 | 1 | 5   | 15 | 4 | 207.03   | 242.05   | 12.74  | o |
| 2357 | 1 | 6   | 15 | 4 | 141.70   | 149.69   | 9.55   | o |
| 2358 | 1 | 7   | 15 | 4 | 257.12   | 283.46   | 12.74  | o |
| 2359 | 1 | 8   | 15 | 4 | 154.11   | 171.99   | 9.55   | o |
| 2360 | 1 | 9   | 15 | 4 | 545.90   | 509.59   | 19.11  | o |
| 2361 | 1 | 10  | 15 | 4 | 1.27     | 3.18     | 3.18   | < |
| 2362 | 1 | 11  | 15 | 4 | 30.77    | 47.77    | 6.37   | o |
| 2363 | 1 | 12  | 15 | 4 | 108.23   | 121.03   | 12.74  | o |
| 2364 | 1 | -12 | 16 | 4 | 162.19   | 187.91   | 19.11  | o |
| 2365 | 1 | -11 | 16 | 4 | 12.67    | 9.55     | 6.37   | < |
| 2366 | 1 | -10 | 16 | 4 | 442.22   | 439.52   | 60.51  | o |
| 2367 | 1 | -9  | 16 | 4 | 6829.14  | 7946.39  | 242.05 | o |
| 2368 | 1 | -8  | 16 | 4 | 1787.69  | 1875.92  | 89.18  | o |
| 2369 | 1 | -7  | 16 | 4 | 2700.61  | 3012.94  | 95.55  | o |
| 2370 | 1 | -6  | 16 | 4 | 19516.80 | 23431.50 | 710.24 | o |
| 2371 | 1 | -5  | 16 | 4 | 1896.49  | 2579.79  | 92.36  | o |
| 2372 | 1 | -4  | 16 | 4 | 15179.10 | 19905.80 | 601.95 | o |
| 2373 | 1 | -2  | 16 | 4 | 2016.66  | 2309.07  | 82.81  | o |
| 2374 | 1 | -1  | 16 | 4 | 4508.94  | 5013.08  | 178.36 | o |
| 2375 | 1 | 0   | 16 | 4 | 8886.74  | 10529.40 | 321.68 | o |
| 2376 | 1 | 1   | 16 | 4 | 3970.51  | 4876.12  | 149.69 | o |
| 2377 | 1 | 3   | 16 | 4 | 5400.86  | 6121.43  | 187.91 | o |
| 2378 | 1 | 4   | 16 | 4 | 16535.10 | 19772.00 | 694.31 | o |
| 2379 | 1 | 5   | 16 | 4 | 2735.33  | 2946.06  | 92.36  | o |
| 2380 | 1 | 7   | 16 | 4 | 2733.44  | 3175.37  | 98.73  | o |
| 2381 | 1 | 8   | 16 | 4 | 2347.13  | 2321.81  | 73.25  | o |
| 2382 | 1 | 9   | 16 | 4 | 5732.16  | 6853.96  | 210.21 | o |
| 2383 | 1 | 10  | 16 | 4 | 117.04   | 117.84   | 22.29  | o |
| 2384 | 1 | 11  | 16 | 4 | 8.68     | 9.55     | 6.37   | < |
| 2385 | 1 | 12  | 16 | 4 | 441.39   | 554.18   | 38.22  | o |
| 2386 | 1 | -11 | 17 | 4 | 0.39     | 12.74    | 6.37   | < |
| 2387 | 1 | -10 | 17 | 4 | 132.04   | 130.58   | 15.92  | o |
| 2388 | 1 | -9  | 17 | 4 | 53.54    | 54.14    | 6.37   | o |
| 2389 | 1 | -8  | 17 | 4 | 31.71    | 47.77    | 6.37   | o |
| 2390 | 1 | -7  | 17 | 4 | 70.82    | 82.81    | 82.81  | < |
| 2391 | 1 | -6  | 17 | 4 | 236.21   | 245.24   | 12.74  | o |
| 2392 | 1 | -5  | 17 | 4 | 530.08   | 617.88   | 22.29  | o |
| 2393 | 1 | -1  | 17 | 4 | 108.45   | 105.10   | 6.37   | o |
| 2394 | 1 | 0   | 17 | 4 | 15.14    | 41.40    | 6.37   | o |
| 2395 | 1 | 2   | 17 | 4 | 314.47   | 257.98   | 12.74  | o |
| 2396 | 1 | 3   | 17 | 4 | 174.32   | 162.43   | 9.55   | o |
| 2397 | 1 | 4   | 17 | 4 | 46.87    | 85.99    | 6.37   | o |
| 2398 | 1 | 5   | 17 | 4 | 671.72   | 735.72   | 25.48  | o |
| 2399 | 1 | 6   | 17 | 4 | 242.74   | 261.16   | 12.74  | o |
| 2400 | 1 | 7   | 17 | 4 | 318.18   | 270.72   | 12.74  | o |
| 2401 | 1 | 8   | 17 | 4 | 12.10    | 19.11    | 3.18   | o |
| 2402 | 1 | 9   | 17 | 4 | 1.05     | 9.55     | 3.18   | o |
| 2403 | 1 | 10  | 17 | 4 | 128.95   | 124.21   | 6.37   | o |
| 2404 | 1 | 11  | 17 | 4 | 9.18     | 15.92    | 6.37   | < |
| 2405 | 1 | 12  | 17 | 4 | 0.86     | 3.18     | 3.18   | < |
| 2406 | 1 | -11 | 18 | 4 | 261.04   | 334.42   | 57.33  | o |
| 2407 | 1 | -10 | 18 | 4 | 555.03   | 433.15   | 242.05 | < |
| 2408 | 1 | -9  | 18 | 4 | 380.76   | 414.04   | 222.95 | < |
| 2409 | 1 | -8  | 18 | 4 | 1409.03  | 1490.55  | 66.88  | o |
| 2410 | 1 | -7  | 18 | 4 | 277.55   | 261.16   | 47.77  | o |
| 2411 | 1 | -6  | 18 | 4 | 31.55    | 35.03    | 3.18   | o |



|      |   |     |    |   |         |         |        |   |
|------|---|-----|----|---|---------|---------|--------|---|
| 2412 | 1 | -5  | 18 | 4 | 295.91  | 318.49  | 15.92  | o |
| 2413 | 1 | -4  | 18 | 4 | 3576.53 | 3659.48 | 114.66 | o |
| 2414 | 1 | -3  | 18 | 4 | 521.26  | 566.92  | 22.29  | o |
| 2415 | 1 | -2  | 18 | 4 | 3562.94 | 4952.56 | 216.57 | o |
| 2416 | 1 | -1  | 18 | 4 | 7169.04 | 8768.10 | 267.53 | o |
| 2417 | 1 | 0   | 18 | 4 | 169.83  | 191.10  | 9.55   | o |
| 2418 | 1 | 1   | 18 | 4 | 6556.01 | 8242.59 | 289.83 | o |
| 2419 | 1 | 2   | 18 | 4 | 4557.41 | 5092.70 | 156.06 | o |
| 2420 | 1 | 3   | 18 | 4 | 371.42  | 487.29  | 19.11  | o |
| 2421 | 1 | 5   | 18 | 4 | 313.16  | 347.16  | 15.92  | o |
| 2422 | 1 | 6   | 18 | 4 | 23.78   | 38.22   | 6.37   | o |
| 2423 | 1 | 7   | 18 | 4 | 241.74  | 229.32  | 12.74  | o |
| 2424 | 1 | 8   | 18 | 4 | 659.16  | 767.57  | 60.51  | o |
| 2425 | 1 | 9   | 18 | 4 | 216.22  | 184.73  | 9.55   | o |
| 2426 | 1 | 10  | 18 | 4 | 1171.29 | 965.03  | 47.77  | o |
| 2427 | 1 | 11  | 18 | 4 | 353.93  | 337.60  | 47.77  | o |
| 2428 | 1 | 12  | 18 | 4 | 25.73   | 35.03   | 12.74  | < |
| 2429 | 1 | -11 | 19 | 4 | 196.79  | 232.50  | 38.22  | o |
| 2430 | 1 | -10 | 19 | 4 | 34.51   | 57.33   | 6.37   | o |
| 2431 | 1 | -9  | 19 | 4 | 10.19   | 12.74   | 66.88  | < |
| 2432 | 1 | -8  | 19 | 4 | 544.65  | 617.88  | 108.29 | o |
| 2433 | 1 | -7  | 19 | 4 | 342.20  | 379.01  | 22.29  | o |
| 2434 | 1 | -6  | 19 | 4 | 420.95  | 394.93  | 15.92  | o |
| 2435 | 1 | -5  | 19 | 4 | 254.89  | 238.87  | 12.74  | o |
| 2436 | 1 | -4  | 19 | 4 | 119.73  | 121.03  | 9.55   | o |
| 2437 | 1 | -3  | 19 | 4 | 540.01  | 598.77  | 22.29  | o |
| 2438 | 1 | -2  | 19 | 4 | 124.66  | 146.51  | 9.55   | o |
| 2439 | 1 | -1  | 19 | 4 | 9.94    | 12.74   | 3.18   | o |
| 2440 | 1 | 0   | 19 | 4 | 30.19   | 54.14   | 6.37   | o |
| 2441 | 1 | 1   | 19 | 4 | 5.70    | 12.74   | 3.18   | o |
| 2442 | 1 | 3   | 19 | 4 | 555.23  | 614.69  | 25.48  | o |
| 2443 | 1 | 7   | 19 | 4 | 656.31  | 652.91  | 25.48  | o |
| 2444 | 1 | 8   | 19 | 4 | 457.67  | 465.00  | 19.11  | o |
| 2445 | 1 | 9   | 19 | 4 | 156.73  | 146.51  | 9.55   | o |
| 2446 | 1 | 10  | 19 | 4 | 47.35   | 66.88   | 9.55   | o |
| 2447 | 1 | 11  | 19 | 4 | 177.47  | 165.62  | 19.11  | o |
| 2448 | 1 | -11 | 20 | 4 | 33.00   | 79.62   | 12.74  | o |
| 2449 | 1 | -10 | 20 | 4 | 401.45  | 321.68  | 254.79 | < |
| 2450 | 1 | -9  | 20 | 4 | 555.01  | 503.22  | 101.92 | o |
| 2451 | 1 | -8  | 20 | 4 | 2097.02 | 2051.09 | 79.62  | o |
| 2452 | 1 | -7  | 20 | 4 | 1662.29 | 1484.18 | 57.33  | o |
| 2453 | 1 | -6  | 20 | 4 | 4407.25 | 5611.84 | 184.73 | o |
| 2454 | 1 | -5  | 20 | 4 | 689.48  | 783.49  | 28.66  | o |
| 2455 | 1 | -4  | 20 | 4 | 2485.75 | 2837.77 | 101.92 | o |
| 2456 | 1 | -3  | 20 | 4 | 685.32  | 652.91  | 25.48  | o |
| 2457 | 1 | -2  | 20 | 4 | 3190.03 | 4207.29 | 130.58 | o |
| 2458 | 1 | 0   | 20 | 4 | 6833.60 | 8672.56 | 264.35 | o |
| 2459 | 1 | 1   | 20 | 4 | 2871.44 | 3184.93 | 98.73  | o |
| 2460 | 1 | 2   | 20 | 4 | 3866.00 | 4685.03 | 146.51 | o |
| 2461 | 1 | 3   | 20 | 4 | 591.77  | 668.84  | 25.48  | o |
| 2462 | 1 | 5   | 20 | 4 | 877.73  | 888.59  | 38.22  | o |
| 2463 | 1 | 6   | 20 | 4 | 6515.37 | 7248.89 | 222.95 | o |
| 2464 | 1 | 7   | 20 | 4 | 1448.99 | 1519.21 | 50.96  | o |
| 2465 | 1 | 8   | 20 | 4 | 926.33  | 1095.61 | 44.59  | o |
| 2466 | 1 | 9   | 20 | 4 | 289.25  | 286.64  | 15.92  | o |
| 2467 | 1 | 10  | 20 | 4 | 882.90  | 687.94  | 54.14  | o |
| 2468 | 1 | -10 | 21 | 4 | 43.10   | 50.96   | 9.55   | o |
| 2469 | 1 | -9  | 21 | 4 | 0.45    | 3.18    | 3.18   | < |

|      |   |    |    |   |         |         |        |   |
|------|---|----|----|---|---------|---------|--------|---|
| 2470 | 1 | -8 | 21 | 4 | 80.64   | 92.36   | 6.37   | o |
| 2471 | 1 | -7 | 21 | 4 | 8.53    | 12.74   | 3.18   | o |
| 2472 | 1 | -6 | 21 | 4 | 45.67   | 38.22   | 6.37   | o |
| 2473 | 1 | -5 | 21 | 4 | 27.15   | 35.03   | 3.18   | o |
| 2474 | 1 | -4 | 21 | 4 | 562.96  | 573.29  | 31.85  | o |
| 2475 | 1 | -3 | 21 | 4 | 243.32  | 283.46  | 12.74  | o |
| 2476 | 1 | 0  | 21 | 4 | 1.08    | 15.92   | 35.03  | < |
| 2477 | 1 | 1  | 21 | 4 | 308.70  | 273.90  | 12.74  | o |
| 2478 | 1 | 2  | 21 | 4 | 103.83  | 130.58  | 6.37   | o |
| 2479 | 1 | 3  | 21 | 4 | 247.98  | 289.83  | 12.74  | o |
| 2480 | 1 | 4  | 21 | 4 | 433.28  | 531.88  | 22.29  | o |
| 2481 | 1 | 5  | 21 | 4 | 21.32   | 35.03   | 6.37   | o |
| 2482 | 1 | 6  | 21 | 4 | 17.30   | 31.85   | 3.18   | o |
| 2483 | 1 | 7  | 21 | 4 | 0.83    | 9.55    | 3.18   | o |
| 2484 | 1 | 8  | 21 | 4 | 122.30  | 127.40  | 9.55   | o |
| 2485 | 1 | 9  | 21 | 4 | 0.46    | 6.37    | 6.37   | < |
| 2486 | 1 | -9 | 22 | 4 | 999.89  | 611.51  | 70.07  | o |
| 2487 | 1 | -8 | 22 | 4 | 625.31  | 595.58  | 63.70  | o |
| 2488 | 1 | -7 | 22 | 4 | 2060.29 | 1891.85 | 63.70  | o |
| 2489 | 1 | -6 | 22 | 4 | 1446.13 | 1356.78 | 44.59  | o |
| 2490 | 1 | -5 | 22 | 4 | 461.51  | 554.18  | 22.29  | o |
| 2491 | 1 | -4 | 22 | 4 | 4848.56 | 5828.42 | 207.02 | o |
| 2492 | 1 | -3 | 22 | 4 | 2067.08 | 2340.92 | 73.25  | o |
| 2493 | 1 | -2 | 22 | 4 | 501.46  | 643.35  | 28.66  | o |
| 2494 | 1 | -1 | 22 | 4 | 1983.00 | 2675.34 | 85.99  | o |
| 2495 | 1 | 0  | 22 | 4 | 69.01   | 95.55   | 6.37   | o |
| 2496 | 1 | 1  | 22 | 4 | 2279.00 | 2853.69 | 89.18  | o |
| 2497 | 1 | 2  | 22 | 4 | 530.77  | 589.21  | 25.48  | o |
| 2498 | 1 | 3  | 22 | 4 | 1969.92 | 2369.59 | 76.44  | o |
| 2499 | 1 | 4  | 22 | 4 | 5325.95 | 6162.83 | 191.10 | o |
| 2500 | 1 | 5  | 22 | 4 | 786.17  | 707.05  | 25.48  | o |
| 2501 | 1 | 6  | 22 | 4 | 963.02  | 1073.32 | 38.22  | o |
| 2502 | 1 | 7  | 22 | 4 | 1436.05 | 1646.61 | 54.14  | o |
| 2503 | 1 | 8  | 22 | 4 | 1119.11 | 1019.18 | 41.40  | o |
| 2504 | 1 | -7 | 23 | 4 | 0.56    | 3.18    | 3.18   | < |
| 2505 | 1 | -5 | 23 | 4 | 309.37  | 337.60  | 15.92  | o |
| 2506 | 1 | -1 | 23 | 4 | 45.20   | 79.62   | 6.37   | o |
| 2507 | 1 | 0  | 23 | 4 | 237.88  | 331.23  | 15.92  | o |
| 2508 | 1 | 1  | 23 | 4 | 126.99  | 117.84  | 9.55   | o |
| 2509 | 1 | 2  | 23 | 4 | 78.35   | 85.99   | 9.55   | o |
| 2510 | 1 | 3  | 23 | 4 | 76.32   | 70.07   | 6.37   | o |
| 2511 | 1 | 4  | 23 | 4 | 818.41  | 729.35  | 28.66  | o |
| 2512 | 1 | 5  | 23 | 4 | 469.56  | 474.55  | 19.11  | o |
| 2513 | 1 | 6  | 23 | 4 | 264.82  | 270.72  | 12.74  | o |
| 2514 | 1 | 7  | 23 | 4 | 23.09   | 25.48   | 6.37   | o |
| 2515 | 1 | 8  | 23 | 4 | 89.30   | 95.55   | 9.55   | o |
| 2516 | 1 | -7 | 24 | 4 | 1252.51 | 1248.49 | 63.70  | o |
| 2517 | 1 | -6 | 24 | 4 | 3280.51 | 3340.99 | 124.21 | o |
| 2518 | 1 | -5 | 24 | 4 | 234.00  | 334.42  | 15.92  | o |
| 2519 | 1 | -3 | 24 | 4 | 5277.98 | 6793.45 | 264.35 | o |
| 2520 | 1 | -2 | 24 | 4 | 4036.66 | 4296.47 | 133.77 | o |
| 2521 | 1 | -1 | 24 | 4 | 54.68   | 70.07   | 6.37   | o |
| 2522 | 1 | 0  | 24 | 4 | 4872.34 | 5904.85 | 194.28 | o |
| 2523 | 1 | 1  | 24 | 4 | 76.84   | 101.92  | 6.37   | o |
| 2524 | 1 | 3  | 24 | 4 | 5042.42 | 6822.11 | 242.05 | o |
| 2525 | 1 | 4  | 24 | 4 | 553.93  | 449.08  | 19.11  | o |
| 2526 | 1 | 5  | 24 | 4 | 225.89  | 305.75  | 15.92  | o |
| 2527 | 1 | 6  | 24 | 4 | 1843.97 | 2197.60 | 82.81  | o |

|      |   |     |    |   |         |         |        |   |
|------|---|-----|----|---|---------|---------|--------|---|
| 2528 | 1 | 7   | 24 | 4 | 998.84  | 1060.58 | 54.14  | o |
| 2529 | 1 | -6  | 25 | 4 | 15.74   | 35.03   | 9.55   | o |
| 2530 | 1 | -5  | 25 | 4 | 57.12   | 98.73   | 9.55   | o |
| 2531 | 1 | -4  | 25 | 4 | 230.53  | 213.39  | 15.92  | o |
| 2532 | 1 | -3  | 25 | 4 | 112.24  | 136.95  | 9.55   | o |
| 2533 | 1 | -2  | 25 | 4 | 206.72  | 184.73  | 9.55   | o |
| 2534 | 1 | -1  | 25 | 4 | 288.88  | 315.31  | 12.74  | o |
| 2535 | 1 | 0   | 25 | 4 | 6.26    | 12.74   | 3.18   | o |
| 2536 | 1 | 3   | 25 | 4 | 85.59   | 114.66  | 6.37   | o |
| 2537 | 1 | 5   | 25 | 4 | 184.52  | 159.25  | 12.74  | o |
| 2538 | 1 | 6   | 25 | 4 | 66.33   | 82.81   | 9.55   | o |
| 2539 | 1 | 7   | 25 | 4 | 30.47   | 47.77   | 6.37   | o |
| 2540 | 1 | -6  | 26 | 4 | 33.40   | 38.22   | 6.37   | o |
| 2541 | 1 | -5  | 26 | 4 | 327.82  | 394.93  | 25.48  | o |
| 2542 | 1 | -4  | 26 | 4 | 935.98  | 955.48  | 47.77  | o |
| 2543 | 1 | -3  | 26 | 4 | 1351.73 | 1484.18 | 70.07  | o |
| 2544 | 1 | -2  | 26 | 4 | 1088.20 | 1273.97 | 50.96  | o |
| 2545 | 1 | -1  | 26 | 4 | 324.14  | 375.82  | 15.92  | o |
| 2546 | 1 | 0   | 26 | 4 | 220.88  | 213.39  | 9.55   | o |
| 2547 | 1 | 2   | 26 | 4 | 1264.69 | 1270.79 | 50.96  | o |
| 2548 | 1 | 3   | 26 | 4 | 1676.39 | 1598.83 | 108.29 | o |
| 2549 | 1 | 4   | 26 | 4 | 964.68  | 955.48  | 47.77  | o |
| 2550 | 1 | 5   | 26 | 4 | 267.36  | 315.31  | 19.11  | o |
| 2551 | 1 | 6   | 26 | 4 | 2.20    | 12.74   | 6.37   | < |
| 2552 | 1 | -5  | 27 | 4 | 511.97  | 500.03  | 28.66  | o |
| 2553 | 1 | -4  | 27 | 4 | 20.42   | 41.40   | 6.37   | o |
| 2554 | 1 | -3  | 27 | 4 | 0.24    | 6.37    | 3.18   | < |
| 2555 | 1 | -2  | 27 | 4 | 364.01  | 273.90  | 19.11  | o |
| 2556 | 1 | -1  | 27 | 4 | 993.68  | 1031.92 | 73.25  | o |
| 2557 | 1 | 1   | 27 | 4 | 812.86  | 853.56  | 63.70  | o |
| 2558 | 1 | 3   | 27 | 4 | 0.37    | 6.37    | 6.37   | < |
| 2559 | 1 | 4   | 27 | 4 | 70.71   | 66.88   | 12.74  | o |
| 2560 | 1 | 5   | 27 | 4 | 294.59  | 382.19  | 35.03  | o |
| 2561 | 1 | 6   | 27 | 4 | 15.61   | 60.51   | 12.74  | o |
| 2562 | 1 | -5  | 28 | 4 | 6.71    | 6.37    | 6.37   | < |
| 2563 | 1 | -4  | 28 | 4 | 3734.33 | 3261.37 | 210.21 | o |
| 2564 | 1 | -9  | 1  | 5 | 221.61  | 222.95  | 22.29  | o |
| 2565 | 1 | -8  | 1  | 5 | 7277.29 | 6955.88 | 267.53 | o |
| 2566 | 1 | -7  | 1  | 5 | 368.55  | 375.82  | 12.74  | o |
| 2567 | 1 | -5  | 1  | 5 | 4043.08 | 3882.43 | 117.84 | o |
| 2568 | 1 | -4  | 1  | 5 | 646.41  | 608.32  | 19.11  | o |
| 2569 | 1 | -2  | 1  | 5 | 1427.29 | 1436.40 | 44.59  | o |
| 2570 | 1 | 0   | 1  | 5 | 1.52    | 15.92   | 3.18   | o |
| 2571 | 1 | 2   | 1  | 5 | 2057.85 | 1627.50 | 60.51  | o |
| 2572 | 1 | 3   | 1  | 5 | 89.77   | 63.70   | 6.37   | o |
| 2573 | 1 | 5   | 1  | 5 | 2378.92 | 2382.33 | 73.25  | o |
| 2574 | 1 | 7   | 1  | 5 | 454.77  | 407.67  | 19.11  | o |
| 2575 | 1 | 8   | 1  | 5 | 5963.57 | 5630.95 | 200.65 | o |
| 2576 | 1 | 9   | 1  | 5 | 301.63  | 321.68  | 70.07  | o |
| 2577 | 1 | 10  | 1  | 5 | 0.45    | 57.33   | 22.29  | < |
| 2578 | 1 | 11  | 1  | 5 | 5486.99 | 6452.66 | 289.83 | o |
| 2579 | 1 | 12  | 1  | 5 | 89.18   | 85.99   | 6.37   | o |
| 2580 | 1 | -10 | 2  | 5 | 0.87    | 3.18    | 3.18   | < |
| 2581 | 1 | -9  | 2  | 5 | 372.27  | 363.08  | 19.11  | o |
| 2582 | 1 | -8  | 2  | 5 | 18.51   | 22.29   | 3.18   | o |
| 2583 | 1 | -7  | 2  | 5 | 41.11   | 9.55    | 22.29  | < |
| 2584 | 1 | -6  | 2  | 5 | 313.87  | 312.12  | 12.74  | o |
| 2585 | 1 | -5  | 2  | 5 | 1132.40 | 1130.65 | 35.03  | o |

|      |   |     |   |   |          |          |         |   |
|------|---|-----|---|---|----------|----------|---------|---|
| 2586 | 1 | -4  | 2 | 5 | 437.00   | 433.15   | 15.92   | o |
| 2587 | 1 | -2  | 2 | 5 | 1309.44  | 1140.20  | 35.03   | o |
| 2588 | 1 | -1  | 2 | 5 | 11.70    | 15.92    | 3.18    | o |
| 2589 | 1 | 0   | 2 | 5 | 394.95   | 398.12   | 12.74   | o |
| 2590 | 1 | 1   | 2 | 5 | 30.71    | 31.85    | 3.18    | o |
| 2591 | 1 | 2   | 2 | 5 | 507.77   | 633.80   | 28.66   | o |
| 2592 | 1 | 3   | 2 | 5 | 494.13   | 582.84   | 22.29   | o |
| 2593 | 1 | 4   | 2 | 5 | 534.38   | 455.45   | 19.11   | o |
| 2594 | 1 | 5   | 2 | 5 | 246.17   | 222.95   | 12.74   | o |
| 2595 | 1 | 6   | 2 | 5 | 572.01   | 579.66   | 22.29   | o |
| 2596 | 1 | 7   | 2 | 5 | 591.36   | 611.51   | 22.29   | o |
| 2597 | 1 | 8   | 2 | 5 | 17.02    | 12.74    | 3.18    | o |
| 2598 | 1 | 9   | 2 | 5 | 69.67    | 63.70    | 19.11   | o |
| 2599 | 1 | 10  | 2 | 5 | 1.25     | 6.37     | 3.18    | < |
| 2600 | 1 | 11  | 2 | 5 | 17.94    | 12.74    | 47.77   | < |
| 2601 | 1 | 12  | 2 | 5 | 272.75   | 318.49   | 28.66   | o |
| 2602 | 1 | -11 | 3 | 5 | 130.51   | 178.36   | 15.92   | o |
| 2603 | 1 | -10 | 3 | 5 | 1391.93  | 1210.27  | 197.46  | o |
| 2604 | 1 | -9  | 3 | 5 | 312.04   | 257.98   | 54.14   | o |
| 2605 | 1 | -8  | 3 | 5 | 9722.54  | 9809.58  | 318.49  | o |
| 2606 | 1 | -7  | 3 | 5 | 4007.90  | 3942.94  | 140.14  | o |
| 2607 | 1 | -6  | 3 | 5 | 3619.97  | 3809.17  | 133.77  | o |
| 2608 | 1 | -5  | 3 | 5 | 18153.80 | 18924.80 | 659.28  | o |
| 2609 | 1 | -4  | 3 | 5 | 717.72   | 694.31   | 22.29   | o |
| 2610 | 1 | -3  | 3 | 5 | 930.93   | 898.15   | 28.66   | o |
| 2611 | 1 | -2  | 3 | 5 | 6758.73  | 6777.52  | 207.02  | o |
| 2612 | 1 | 1   | 3 | 5 | 1586.36  | 1901.40  | 95.55   | o |
| 2613 | 1 | 2   | 3 | 5 | 6338.07  | 6388.96  | 277.09  | o |
| 2614 | 1 | 4   | 3 | 5 | 376.92   | 455.45   | 15.92   | o |
| 2615 | 1 | 5   | 3 | 5 | 13222.70 | 12564.50 | 439.52  | o |
| 2616 | 1 | 6   | 3 | 5 | 3040.35  | 2958.80  | 92.36   | o |
| 2617 | 1 | 7   | 3 | 5 | 5659.83  | 5640.51  | 171.99  | o |
| 2618 | 1 | 8   | 3 | 5 | 10487.40 | 10898.80 | 331.23  | o |
| 2619 | 1 | 9   | 3 | 5 | 550.14   | 461.81   | 28.66   | o |
| 2620 | 1 | 10  | 3 | 5 | 1224.19  | 1210.27  | 70.07   | o |
| 2621 | 1 | 11  | 3 | 5 | 179.14   | 210.21   | 50.96   | o |
| 2622 | 1 | 12  | 3 | 5 | 21.75    | 28.66    | 25.48   | < |
| 2623 | 1 | 13  | 3 | 5 | 449.67   | 433.15   | 38.22   | o |
| 2624 | 1 | -11 | 4 | 5 | 49.29    | 70.07    | 15.92   | o |
| 2625 | 1 | -10 | 4 | 5 | 11.79    | 15.92    | 3.18    | o |
| 2626 | 1 | -9  | 4 | 5 | 8.98     | 6.37     | 3.18    | < |
| 2627 | 1 | -8  | 4 | 5 | 220.42   | 213.39   | 1347.22 | < |
| 2628 | 1 | -7  | 4 | 5 | 128.97   | 111.47   | 6.37    | o |
| 2629 | 1 | -6  | 4 | 5 | 0.72     | 3.18     | 3.18    | < |
| 2630 | 1 | -5  | 4 | 5 | 9.79     | 0.00     | 12.74   | < |
| 2631 | 1 | -4  | 4 | 5 | 0.26     | 3.18     | 3.18    | < |
| 2632 | 1 | -3  | 4 | 5 | 449.71   | 480.92   | 19.11   | o |
| 2633 | 1 | -2  | 4 | 5 | 1235.83  | 1296.27  | 47.77   | o |
| 2634 | 1 | 0   | 4 | 5 | 90.17    | 73.25    | 6.37    | o |
| 2635 | 1 | 1   | 4 | 5 | 316.07   | 283.46   | 19.11   | o |
| 2636 | 1 | 2   | 4 | 5 | 1050.40  | 1216.64  | 44.59   | o |
| 2637 | 1 | 3   | 4 | 5 | 144.07   | 165.62   | 9.55    | o |
| 2638 | 1 | 4   | 4 | 5 | 153.31   | 171.99   | 9.55    | o |
| 2639 | 1 | 5   | 4 | 5 | 231.17   | 229.32   | 9.55    | o |
| 2640 | 1 | 6   | 4 | 5 | 0.43     | 0.00     | 3.18    | < |
| 2641 | 1 | 7   | 4 | 5 | 0.59     | 6.37     | 50.96   | < |
| 2642 | 1 | 8   | 4 | 5 | 390.64   | 353.53   | 15.92   | o |
| 2643 | 1 | 9   | 4 | 5 | 70.90    | 66.88    | 6.37    | o |

|      |   |     |   |   |          |          |        |   |
|------|---|-----|---|---|----------|----------|--------|---|
| 2644 | 1 | 10  | 4 | 5 | 2.68     | 6.37     | 3.18   | < |
| 2645 | 1 | 11  | 4 | 5 | 64.68    | 76.44    | 6.37   | o |
| 2646 | 1 | 12  | 4 | 5 | 29.10    | 38.22    | 6.37   | o |
| 2647 | 1 | 13  | 4 | 5 | 2.08     | 6.37     | 6.37   | < |
| 2648 | 1 | -12 | 5 | 5 | 125.06   | 168.80   | 9.55   | o |
| 2649 | 1 | -11 | 5 | 5 | 45.33    | 101.92   | 12.74  | o |
| 2650 | 1 | -10 | 5 | 5 | 839.23   | 844.01   | 50.96  | o |
| 2651 | 1 | -9  | 5 | 5 | 54.31    | 73.25    | 6.37   | o |
| 2652 | 1 | -8  | 5 | 5 | 47.87    | 60.51    | 245.24 | < |
| 2653 | 1 | -7  | 5 | 5 | 1285.41  | 1038.29  | 35.03  | o |
| 2654 | 1 | -6  | 5 | 5 | 25.50    | 28.66    | 3.18   | o |
| 2655 | 1 | -5  | 5 | 5 | 15458.10 | 16249.50 | 490.48 | o |
| 2656 | 1 | -4  | 5 | 5 | 3521.01  | 4035.30  | 124.21 | o |
| 2657 | 1 | -3  | 5 | 5 | 7313.43  | 7653.38  | 232.50 | o |
| 2658 | 1 | -2  | 5 | 5 | 3593.46  | 4156.33  | 127.40 | o |
| 2659 | 1 | 0   | 5 | 5 | 13.28    | 35.03    | 6.37   | o |
| 2660 | 1 | 2   | 5 | 5 | 4198.14  | 4446.16  | 136.95 | o |
| 2661 | 1 | 3   | 5 | 5 | 6848.62  | 6678.79  | 235.68 | o |
| 2662 | 1 | 4   | 5 | 5 | 2932.63  | 2939.69  | 105.10 | o |
| 2663 | 1 | 5   | 5 | 5 | 10792.50 | 11602.70 | 350.34 | o |
| 2664 | 1 | 6   | 5 | 5 | 7.51     | 12.74    | 3.18   | o |
| 2665 | 1 | 7   | 5 | 5 | 1133.35  | 958.66   | 31.85  | o |
| 2666 | 1 | 8   | 5 | 5 | 327.42   | 382.19   | 15.92  | o |
| 2667 | 1 | 9   | 5 | 5 | 17.41    | 28.66    | 9.55   | < |
| 2668 | 1 | 10  | 5 | 5 | 418.17   | 324.86   | 57.33  | o |
| 2669 | 1 | 11  | 5 | 5 | 97.94    | 165.62   | 12.74  | o |
| 2670 | 1 | 12  | 5 | 5 | 60.61    | 60.51    | 76.44  | < |
| 2671 | 1 | 13  | 5 | 5 | 169.37   | 184.73   | 25.48  | o |
| 2672 | 1 | -12 | 6 | 5 | 148.23   | 187.91   | 12.74  | o |
| 2673 | 1 | -11 | 6 | 5 | 38.01    | 47.77    | 9.55   | o |
| 2674 | 1 | -10 | 6 | 5 | 132.62   | 127.40   | 31.85  | o |
| 2675 | 1 | -9  | 6 | 5 | 338.82   | 369.45   | 19.11  | o |
| 2676 | 1 | -8  | 6 | 5 | 4.32     | 6.37     | 3.18   | < |
| 2677 | 1 | -7  | 6 | 5 | 127.27   | 121.03   | 105.10 | < |
| 2678 | 1 | -6  | 6 | 5 | 4.27     | 15.92    | 25.48  | < |
| 2679 | 1 | -5  | 6 | 5 | 58.04    | 66.88    | 6.37   | o |
| 2680 | 1 | -4  | 6 | 5 | 521.05   | 455.45   | 15.92  | o |
| 2681 | 1 | -3  | 6 | 5 | 37.77    | 25.48    | 3.18   | o |
| 2682 | 1 | -2  | 6 | 5 | 112.12   | 146.51   | 9.55   | o |
| 2683 | 1 | -1  | 6 | 5 | 11.91    | 28.66    | 3.18   | o |
| 2684 | 1 | 0   | 6 | 5 | 761.91   | 707.05   | 25.48  | o |
| 2685 | 1 | 1   | 6 | 5 | 6.53     | 15.92    | 3.18   | o |
| 2686 | 1 | 2   | 6 | 5 | 150.62   | 143.32   | 9.55   | o |
| 2687 | 1 | 3   | 6 | 5 | 0.21     | -9.55    | 3.18   | < |
| 2688 | 1 | 4   | 6 | 5 | 396.12   | 426.78   | 15.92  | o |
| 2689 | 1 | 5   | 6 | 5 | 102.51   | 146.51   | 6.37   | o |
| 2690 | 1 | 6   | 6 | 5 | 16.01    | 22.29    | 3.18   | o |
| 2691 | 1 | 7   | 6 | 5 | 171.21   | 197.46   | 9.55   | o |
| 2692 | 1 | 8   | 6 | 5 | 96.94    | 95.55    | 6.37   | o |
| 2693 | 1 | 9   | 6 | 5 | 1.06     | 0.00     | 293.01 | < |
| 2694 | 1 | 10  | 6 | 5 | 304.17   | 308.94   | 38.22  | o |
| 2695 | 1 | 11  | 6 | 5 | 1.71     | -3.18    | 3.18   | < |
| 2696 | 1 | 12  | 6 | 5 | 146.41   | 165.62   | 121.03 | < |
| 2697 | 1 | 13  | 6 | 5 | 88.37    | 105.10   | 15.92  | o |
| 2698 | 1 | -12 | 7 | 5 | 1755.21  | 2153.01  | 124.21 | o |
| 2699 | 1 | -11 | 7 | 5 | 11.38    | 92.36    | 111.47 | < |
| 2700 | 1 | -10 | 7 | 5 | 289.18   | 200.65   | 25.48  | o |
| 2701 | 1 | -9  | 7 | 5 | 115.53   | 136.95   | 44.59  | o |

|      |   |     |   |   |          |          |         |   |
|------|---|-----|---|---|----------|----------|---------|---|
| 2702 | 1 | -8  | 7 | 5 | 1809.09  | 1404.55  | 63.70   | o |
| 2703 | 1 | -7  | 7 | 5 | 3332.03  | 2875.99  | 89.18   | o |
| 2704 | 1 | -6  | 7 | 5 | 70.84    | 127.40   | 9.55    | o |
| 2705 | 1 | -5  | 7 | 5 | 4052.63  | 4573.56  | 140.14  | o |
| 2706 | 1 | -4  | 7 | 5 | 14857.30 | 17571.20 | 566.92  | o |
| 2707 | 1 | -3  | 7 | 5 | 1845.57  | 2025.61  | 89.18   | o |
| 2708 | 1 | -2  | 7 | 5 | 19483.70 | 23807.30 | 1019.18 | o |
| 2709 | 1 | 1   | 7 | 5 | 10136.00 | 10175.80 | 356.71  | o |
| 2710 | 1 | 2   | 7 | 5 | 21205.90 | 21396.30 | 748.46  | o |
| 2711 | 1 | 4   | 7 | 5 | 15328.90 | 15771.80 | 477.74  | o |
| 2712 | 1 | 5   | 7 | 5 | 6553.32  | 6181.94  | 219.76  | o |
| 2713 | 1 | 6   | 7 | 5 | 478.65   | 579.66   | 22.29   | o |
| 2714 | 1 | 7   | 7 | 5 | 2039.03  | 1723.05  | 76.44   | o |
| 2715 | 1 | 8   | 7 | 5 | 1256.12  | 980.96   | 146.51  | o |
| 2716 | 1 | 9   | 7 | 5 | 110.79   | 95.55    | 28.66   | o |
| 2717 | 1 | 10  | 7 | 5 | 211.95   | 165.62   | 19.11   | o |
| 2718 | 1 | 11  | 7 | 5 | 98.16    | 111.47   | 12.74   | o |
| 2719 | 1 | 12  | 7 | 5 | 1125.96  | 866.30   | 293.01  | < |
| 2720 | 1 | 13  | 7 | 5 | 0.37     | 3.18     | 9.55    | < |
| 2721 | 1 | -12 | 8 | 5 | 48.30    | 54.14    | 6.37    | o |
| 2722 | 1 | -11 | 8 | 5 | 47.17    | 54.14    | 28.66   | < |
| 2723 | 1 | -10 | 8 | 5 | 55.52    | 76.44    | 31.85   | < |
| 2724 | 1 | -9  | 8 | 5 | 84.14    | 108.29   | 9.55    | o |
| 2725 | 1 | -8  | 8 | 5 | 1.83     | 3.18     | 3.18    | < |
| 2726 | 1 | -7  | 8 | 5 | 644.16   | 538.25   | 25.48   | o |
| 2727 | 1 | -6  | 8 | 5 | 102.96   | 95.55    | 6.37    | o |
| 2728 | 1 | -5  | 8 | 5 | 228.38   | 216.57   | 9.55    | o |
| 2729 | 1 | -4  | 8 | 5 | 77.18    | 85.99    | 6.37    | o |
| 2730 | 1 | -3  | 8 | 5 | 73.99    | 66.88    | 3.18    | o |
| 2731 | 1 | -2  | 8 | 5 | 75.17    | 79.62    | 6.37    | o |
| 2732 | 1 | -1  | 8 | 5 | 12.62    | 19.11    | 3.18    | o |
| 2733 | 1 | 0   | 8 | 5 | 1056.97  | 1111.54  | 50.96   | o |
| 2734 | 1 | 1   | 8 | 5 | 31.09    | 38.22    | 3.18    | o |
| 2735 | 1 | 2   | 8 | 5 | 64.43    | 70.07    | 6.37    | o |
| 2736 | 1 | 3   | 8 | 5 | 28.20    | 35.03    | 3.18    | o |
| 2737 | 1 | 4   | 8 | 5 | 27.54    | 38.22    | 3.18    | o |
| 2738 | 1 | 5   | 8 | 5 | 995.35   | 923.63   | 35.03   | o |
| 2739 | 1 | 6   | 8 | 5 | 100.31   | 82.81    | 6.37    | o |
| 2740 | 1 | 7   | 8 | 5 | 6.70     | 22.29    | 76.44   | < |
| 2741 | 1 | 8   | 8 | 5 | 0.74     | 3.18     | 3.18    | < |
| 2742 | 1 | 9   | 8 | 5 | 43.08    | 38.22    | 31.85   | < |
| 2743 | 1 | 10  | 8 | 5 | 128.28   | 140.14   | 66.88   | < |
| 2744 | 1 | 11  | 8 | 5 | 92.26    | 95.55    | 22.29   | o |
| 2745 | 1 | 12  | 8 | 5 | 25.76    | 31.85    | 6.37    | o |
| 2746 | 1 | 13  | 8 | 5 | 22.62    | 28.66    | 12.74   | < |
| 2747 | 1 | -12 | 9 | 5 | 127.15   | 127.40   | 12.74   | o |
| 2748 | 1 | -11 | 9 | 5 | 1303.25  | 1442.77  | 366.27  | o |
| 2749 | 1 | -10 | 9 | 5 | 919.68   | 901.33   | 76.44   | o |
| 2750 | 1 | -9  | 9 | 5 | 0.74     | 9.55     | 3.18    | o |
| 2751 | 1 | -8  | 9 | 5 | 172.01   | 159.25   | 25.48   | o |
| 2752 | 1 | -7  | 9 | 5 | 456.94   | 458.63   | 19.11   | o |
| 2753 | 1 | -6  | 9 | 5 | 377.60   | 375.82   | 76.44   | o |
| 2754 | 1 | -5  | 9 | 5 | 456.08   | 522.33   | 22.29   | o |
| 2755 | 1 | -4  | 9 | 5 | 5354.65  | 6468.59  | 197.46  | o |
| 2756 | 1 | -3  | 9 | 5 | 118.21   | 85.99    | 6.37    | o |
| 2757 | 1 | -2  | 9 | 5 | 7953.77  | 8844.54  | 267.53  | o |
| 2758 | 1 | -1  | 9 | 5 | 8334.23  | 8981.50  | 315.31  | o |
| 2759 | 1 | 0   | 9 | 5 | 3.94     | 6.37     | 3.18    | < |

|      |   |     |    |   |          |          |         |   |
|------|---|-----|----|---|----------|----------|---------|---|
| 2760 | 1 | 1   | 9  | 5 | 5952.68  | 7331.70  | 222.95  | o |
| 2761 | 1 | 2   | 9  | 5 | 6678.76  | 8156.60  | 248.42  | o |
| 2762 | 1 | 4   | 9  | 5 | 6991.17  | 7194.75  | 219.76  | o |
| 2763 | 1 | 6   | 9  | 5 | 803.45   | 805.79   | 28.66   | o |
| 2764 | 1 | 7   | 9  | 5 | 216.49   | 213.39   | 89.18   | < |
| 2765 | 1 | 8   | 9  | 5 | 257.43   | 248.42   | 28.66   | o |
| 2766 | 1 | 9   | 9  | 5 | 4.45     | 19.11    | 6.37    | o |
| 2767 | 1 | 10  | 9  | 5 | 918.32   | 888.59   | 41.40   | o |
| 2768 | 1 | 11  | 9  | 5 | 1091.74  | 1073.32  | 143.32  | o |
| 2769 | 1 | 12  | 9  | 5 | 199.04   | 146.51   | 22.29   | o |
| 2770 | 1 | -12 | 10 | 5 | 28.74    | 38.22    | 6.37    | o |
| 2771 | 1 | -11 | 10 | 5 | 1.51     | 3.18     | 3.18    | < |
| 2772 | 1 | -10 | 10 | 5 | 34.67    | 31.85    | 6.37    | o |
| 2773 | 1 | -9  | 10 | 5 | 16.27    | 22.29    | 6.37    | o |
| 2774 | 1 | -8  | 10 | 5 | 220.08   | 194.28   | 35.03   | o |
| 2775 | 1 | -7  | 10 | 5 | 59.96    | 50.96    | 3.18    | o |
| 2776 | 1 | -6  | 10 | 5 | 95.79    | 92.36    | 6.37    | o |
| 2777 | 1 | -4  | 10 | 5 | 752.51   | 1000.07  | 38.22   | o |
| 2778 | 1 | -3  | 10 | 5 | 99.53    | 101.92   | 6.37    | o |
| 2779 | 1 | -2  | 10 | 5 | 331.65   | 321.68   | 15.92   | o |
| 2780 | 1 | -1  | 10 | 5 | 4.03     | 12.74    | 3.18    | o |
| 2781 | 1 | 0   | 10 | 5 | 962.93   | 1105.17  | 35.03   | o |
| 2782 | 1 | 1   | 10 | 5 | 12.69    | 19.11    | 3.18    | o |
| 2783 | 1 | 2   | 10 | 5 | 175.15   | 197.46   | 9.55    | o |
| 2784 | 1 | 3   | 10 | 5 | 103.95   | 108.29   | 6.37    | o |
| 2785 | 1 | 4   | 10 | 5 | 1407.21  | 1525.58  | 47.77   | o |
| 2786 | 1 | 5   | 10 | 5 | 145.02   | 140.14   | 6.37    | o |
| 2787 | 1 | 6   | 10 | 5 | 132.41   | 111.47   | 6.37    | o |
| 2788 | 1 | 7   | 10 | 5 | 12.09    | 15.92    | 3.18    | o |
| 2789 | 1 | 8   | 10 | 5 | 420.88   | 401.30   | 19.11   | o |
| 2790 | 1 | 9   | 10 | 5 | 8.09     | 6.37     | 3.18    | < |
| 2791 | 1 | 10  | 10 | 5 | 4.15     | 6.37     | 6.37    | < |
| 2792 | 1 | 11  | 10 | 5 | 30.48    | 41.40    | 3.18    | o |
| 2793 | 1 | 12  | 10 | 5 | 24.95    | 25.48    | 9.55    | < |
| 2794 | 1 | -12 | 11 | 5 | 14.64    | 28.66    | 6.37    | o |
| 2795 | 1 | -11 | 11 | 5 | 5892.66  | 7188.38  | 6293.42 | < |
| 2796 | 1 | -10 | 11 | 5 | 1221.61  | 1340.85  | 89.18   | o |
| 2797 | 1 | -9  | 11 | 5 | 1314.58  | 1238.94  | 60.51   | o |
| 2798 | 1 | -8  | 11 | 5 | 1178.41  | 1127.46  | 38.22   | o |
| 2799 | 1 | -7  | 11 | 5 | 4047.15  | 4070.34  | 124.21  | o |
| 2800 | 1 | -6  | 11 | 5 | 858.95   | 993.70   | 35.03   | o |
| 2801 | 1 | -5  | 11 | 5 | 1713.05  | 1860.00  | 66.88   | o |
| 2802 | 1 | -4  | 11 | 5 | 310.40   | 372.64   | 15.92   | o |
| 2803 | 1 | -2  | 11 | 5 | 1543.43  | 1621.13  | 50.96   | o |
| 2804 | 1 | -1  | 11 | 5 | 11441.30 | 12618.70 | 442.70  | o |
| 2805 | 1 | 1   | 11 | 5 | 9493.38  | 11672.80 | 356.71  | o |
| 2806 | 1 | 2   | 11 | 5 | 1301.05  | 1426.85  | 54.14   | o |
| 2807 | 1 | 3   | 11 | 5 | 692.04   | 748.46   | 25.48   | o |
| 2808 | 1 | 4   | 11 | 5 | 322.22   | 308.94   | 12.74   | o |
| 2809 | 1 | 5   | 11 | 5 | 3162.22  | 3137.15  | 98.73   | o |
| 2810 | 1 | 6   | 11 | 5 | 1085.65  | 1324.93  | 44.59   | o |
| 2811 | 1 | 7   | 11 | 5 | 2644.30  | 3312.32  | 124.21  | o |
| 2812 | 1 | 8   | 11 | 5 | 1033.06  | 930.00   | 82.81   | o |
| 2813 | 1 | 9   | 11 | 5 | 1533.81  | 1640.24  | 60.51   | o |
| 2814 | 1 | 10  | 11 | 5 | 1573.55  | 1608.39  | 85.99   | o |
| 2815 | 1 | 11  | 11 | 5 | 5152.48  | 5959.00  | 194.28  | o |
| 2816 | 1 | 12  | 11 | 5 | 3.11     | 6.37     | 6.37    | < |
| 2817 | 1 | -12 | 12 | 5 | 247.48   | 331.23   | 63.70   | o |

|      |   |     |    |   |         |         |        |   |
|------|---|-----|----|---|---------|---------|--------|---|
| 2818 | 1 | -11 | 12 | 5 | 30.20   | 28.66   | 47.77  | < |
| 2819 | 1 | -10 | 12 | 5 | 62.24   | 70.07   | 38.22  | < |
| 2820 | 1 | -9  | 12 | 5 | 38.46   | 44.59   | 6.37   | o |
| 2821 | 1 | -8  | 12 | 5 | 3.57    | 6.37    | 3.18   | < |
| 2822 | 1 | -7  | 12 | 5 | 1264.48 | 1216.64 | 47.77  | o |
| 2823 | 1 | -6  | 12 | 5 | 1068.13 | 1089.25 | 35.03  | o |
| 2824 | 1 | -5  | 12 | 5 | 80.86   | 108.29  | 9.55   | o |
| 2825 | 1 | -4  | 12 | 5 | 30.42   | 35.03   | 3.18   | o |
| 2826 | 1 | -3  | 12 | 5 | 690.96  | 907.70  | 31.85  | o |
| 2827 | 1 | -1  | 12 | 5 | 42.79   | 73.25   | 6.37   | o |
| 2828 | 1 | 0   | 12 | 5 | 839.70  | 996.88  | 31.85  | o |
| 2829 | 1 | 1   | 12 | 5 | 66.12   | 82.81   | 6.37   | o |
| 2830 | 1 | 2   | 12 | 5 | 1139.49 | 1309.01 | 41.40  | o |
| 2831 | 1 | 3   | 12 | 5 | 1069.59 | 1216.64 | 41.40  | o |
| 2832 | 1 | 4   | 12 | 5 | 9.77    | 22.29   | 3.18   | o |
| 2833 | 1 | 5   | 12 | 5 | 218.88  | 210.21  | 9.55   | o |
| 2834 | 1 | 6   | 12 | 5 | 638.26  | 824.90  | 31.85  | o |
| 2835 | 1 | 7   | 12 | 5 | 200.13  | 404.49  | 35.03  | o |
| 2836 | 1 | 8   | 12 | 5 | 35.11   | 44.59   | 6.37   | o |
| 2837 | 1 | 9   | 12 | 5 | 108.49  | 95.55   | 6.37   | o |
| 2838 | 1 | 10  | 12 | 5 | 172.06  | 162.43  | 9.55   | o |
| 2839 | 1 | 11  | 12 | 5 | 124.13  | 101.92  | 25.48  | o |
| 2840 | 1 | 12  | 12 | 5 | 343.40  | 394.93  | 85.99  | o |
| 2841 | 1 | -12 | 13 | 5 | 157.77  | 194.28  | 73.25  | < |
| 2842 | 1 | -11 | 13 | 5 | 1429.44 | 1684.83 | 226.13 | o |
| 2843 | 1 | -10 | 13 | 5 | 164.83  | 200.65  | 31.85  | o |
| 2844 | 1 | -9  | 13 | 5 | 11.69   | 6.37    | 6.37   | < |
| 2845 | 1 | -8  | 13 | 5 | 4717.40 | 4716.88 | 146.51 | o |
| 2846 | 1 | -7  | 13 | 5 | 231.82  | 235.68  | 9.55   | o |
| 2847 | 1 | -6  | 13 | 5 | 32.85   | 60.51   | 9.55   | o |
| 2848 | 1 | -5  | 13 | 5 | 1052.71 | 901.33  | 31.85  | o |
| 2849 | 1 | -4  | 13 | 5 | 2415.69 | 3137.15 | 98.73  | o |
| 2850 | 1 | -2  | 13 | 5 | 3133.69 | 4140.41 | 127.40 | o |
| 2851 | 1 | 0   | 13 | 5 | 23.96   | 15.92   | 3.18   | o |
| 2852 | 1 | 1   | 13 | 5 | 4973.26 | 5236.02 | 159.25 | o |
| 2853 | 1 | 2   | 13 | 5 | 3583.71 | 4411.12 | 136.95 | o |
| 2854 | 1 | 3   | 13 | 5 | 1222.97 | 1089.25 | 35.03  | o |
| 2855 | 1 | 4   | 13 | 5 | 3442.78 | 3672.22 | 114.66 | o |
| 2856 | 1 | 6   | 13 | 5 | 85.43   | 95.55   | 6.37   | o |
| 2857 | 1 | 7   | 13 | 5 | 104.58  | 95.55   | 9.55   | o |
| 2858 | 1 | 8   | 13 | 5 | 4195.24 | 4178.62 | 127.40 | o |
| 2859 | 1 | 9   | 13 | 5 | 15.29   | 15.92   | 3.18   | o |
| 2860 | 1 | 10  | 13 | 5 | 76.40   | 111.47  | 6.37   | o |
| 2861 | 1 | 11  | 13 | 5 | 1307.21 | 1321.74 | 203.84 | o |
| 2862 | 1 | 12  | 13 | 5 | 152.38  | 146.51  | 47.77  | o |
| 2863 | 1 | -12 | 14 | 5 | 278.06  | 369.45  | 44.59  | o |
| 2864 | 1 | -11 | 14 | 5 | 103.02  | 114.66  | 35.03  | o |
| 2865 | 1 | -10 | 14 | 5 | 346.82  | 375.82  | 73.25  | o |
| 2866 | 1 | -9  | 14 | 5 | 1.03    | 6.37    | 12.74  | < |
| 2867 | 1 | -8  | 14 | 5 | 145.75  | 162.43  | 38.22  | o |
| 2868 | 1 | -7  | 14 | 5 | 59.47   | 57.33   | 19.11  | < |
| 2869 | 1 | -6  | 14 | 5 | 28.24   | 19.11   | 3.18   | o |
| 2870 | 1 | -5  | 14 | 5 | 140.79  | 133.77  | 6.37   | o |
| 2871 | 1 | -4  | 14 | 5 | 7.02    | 15.92   | 3.18   | o |
| 2872 | 1 | -3  | 14 | 5 | 455.19  | 356.71  | 15.92  | o |
| 2873 | 1 | -2  | 14 | 5 | 2503.40 | 2630.75 | 82.81  | o |
| 2874 | 1 | 0   | 14 | 5 | 6.16    | 6.37    | 3.18   | < |
| 2875 | 1 | 1   | 14 | 5 | 244.11  | 219.76  | 9.55   | o |



|      |   |     |    |   |          |          |        |   |
|------|---|-----|----|---|----------|----------|--------|---|
| 2876 | 1 | 3   | 14 | 5 | 224.33   | 318.49   | 15.92  | o |
| 2877 | 1 | 4   | 14 | 5 | 48.53    | 47.77    | 3.18   | o |
| 2878 | 1 | 5   | 14 | 5 | 95.06    | 114.66   | 6.37   | o |
| 2879 | 1 | 6   | 14 | 5 | 15.00    | 19.11    | 3.18   | o |
| 2880 | 1 | 7   | 14 | 5 | 269.39   | 238.87   | 12.74  | o |
| 2881 | 1 | 8   | 14 | 5 | 152.45   | 136.95   | 6.37   | o |
| 2882 | 1 | 9   | 14 | 5 | 77.01    | 92.36    | 6.37   | o |
| 2883 | 1 | 10  | 14 | 5 | 358.21   | 315.31   | 28.66  | o |
| 2884 | 1 | 11  | 14 | 5 | 133.72   | 140.14   | 15.92  | o |
| 2885 | 1 | 12  | 14 | 5 | 328.66   | 439.52   | 31.85  | o |
| 2886 | 1 | -12 | 15 | 5 | 66.03    | 127.40   | 25.48  | o |
| 2887 | 1 | -11 | 15 | 5 | 669.49   | 713.42   | 38.22  | o |
| 2888 | 1 | -10 | 15 | 5 | 47.54    | 79.62    | 9.55   | o |
| 2889 | 1 | -9  | 15 | 5 | 578.72   | 468.18   | 19.11  | o |
| 2890 | 1 | -8  | 15 | 5 | 3031.41  | 3315.51  | 105.10 | o |
| 2891 | 1 | -7  | 15 | 5 | 6239.31  | 6573.69  | 200.65 | o |
| 2892 | 1 | -6  | 15 | 5 | 25.54    | 15.92    | 19.11  | < |
| 2893 | 1 | -5  | 15 | 5 | 15848.40 | 18743.30 | 656.09 | o |
| 2894 | 1 | -4  | 15 | 5 | 205.76   | 178.36   | 9.55   | o |
| 2895 | 1 | -3  | 15 | 5 | 2696.92  | 3089.38  | 95.55  | o |
| 2896 | 1 | -1  | 15 | 5 | 10065.80 | 10424.30 | 315.31 | o |
| 2897 | 1 | 2   | 15 | 5 | 1467.06  | 1433.22  | 54.14  | o |
| 2898 | 1 | 4   | 15 | 5 | 55.74    | 92.36    | 6.37   | o |
| 2899 | 1 | 5   | 15 | 5 | 16172.30 | 19568.20 | 592.40 | o |
| 2900 | 1 | 6   | 15 | 5 | 41.44    | 41.40    | 3.18   | o |
| 2901 | 1 | 7   | 15 | 5 | 5574.82  | 6347.56  | 207.02 | o |
| 2902 | 1 | 8   | 15 | 5 | 3870.81  | 3993.90  | 124.21 | o |
| 2903 | 1 | 9   | 15 | 5 | 489.22   | 458.63   | 19.11  | o |
| 2904 | 1 | 10  | 15 | 5 | 23.10    | 31.85    | 6.37   | o |
| 2905 | 1 | 11  | 15 | 5 | 356.07   | 449.08   | 38.22  | o |
| 2906 | 1 | 12  | 15 | 5 | 52.00    | 73.25    | 89.18  | < |
| 2907 | 1 | -11 | 16 | 5 | 68.86    | 76.44    | 9.55   | o |
| 2908 | 1 | -10 | 16 | 5 | 296.69   | 315.31   | 143.32 | < |
| 2909 | 1 | -9  | 16 | 5 | 21.74    | 15.92    | 19.11  | < |
| 2910 | 1 | -8  | 16 | 5 | 17.65    | 19.11    | 3.18   | o |
| 2911 | 1 | -7  | 16 | 5 | 258.33   | 219.76   | 9.55   | o |
| 2912 | 1 | -6  | 16 | 5 | 279.99   | 264.35   | 12.74  | o |
| 2913 | 1 | -5  | 16 | 5 | 246.15   | 200.65   | 9.55   | o |
| 2914 | 1 | -4  | 16 | 5 | 619.02   | 617.88   | 22.29  | o |
| 2915 | 1 | -1  | 16 | 5 | 40.30    | 57.33    | 6.37   | o |
| 2916 | 1 | 0   | 16 | 5 | 4641.56  | 5911.23  | 210.21 | o |
| 2917 | 1 | 1   | 16 | 5 | 11.52    | 38.22    | 6.37   | o |
| 2918 | 1 | 2   | 16 | 5 | 178.40   | 181.54   | 9.55   | o |
| 2919 | 1 | 3   | 16 | 5 | 442.76   | 404.49   | 22.29  | o |
| 2920 | 1 | 4   | 16 | 5 | 537.93   | 652.91   | 25.48  | o |
| 2921 | 1 | 6   | 16 | 5 | 448.43   | 442.70   | 19.11  | o |
| 2922 | 1 | 7   | 16 | 5 | 9.26     | 44.59    | 6.37   | o |
| 2923 | 1 | 8   | 16 | 5 | 13.38    | 19.11    | 3.18   | o |
| 2924 | 1 | 9   | 16 | 5 | 491.56   | 433.15   | 19.11  | o |
| 2925 | 1 | 10  | 16 | 5 | 355.04   | 356.71   | 50.96  | o |
| 2926 | 1 | 11  | 16 | 5 | 6.61     | 19.11    | 6.37   | o |
| 2927 | 1 | 12  | 16 | 5 | 2.23     | 12.74    | 6.37   | < |
| 2928 | 1 | -11 | 17 | 5 | 304.12   | 308.94   | 82.81  | o |
| 2929 | 1 | -10 | 17 | 5 | 313.87   | 343.97   | 50.96  | o |
| 2930 | 1 | -9  | 17 | 5 | 61.11    | 124.21   | 12.74  | o |
| 2931 | 1 | -8  | 17 | 5 | 5659.11  | 6385.78  | 203.84 | o |
| 2932 | 1 | -7  | 17 | 5 | 1659.52  | 1528.77  | 54.14  | o |
| 2933 | 1 | -6  | 17 | 5 | 593.43   | 547.81   | 22.29  | o |

|      |   |     |    |   |         |         |        |   |
|------|---|-----|----|---|---------|---------|--------|---|
| 2934 | 1 | -5  | 17 | 5 | 9663.53 | 9678.99 | 340.79 | o |
| 2935 | 1 | -2  | 17 | 5 | 328.63  | 347.16  | 15.92  | o |
| 2936 | 1 | 0   | 17 | 5 | 39.77   | 66.88   | 6.37   | o |
| 2937 | 1 | 1   | 17 | 5 | 3070.44 | 3012.94 | 108.29 | o |
| 2938 | 1 | 3   | 17 | 5 | 537.41  | 455.45  | 19.11  | o |
| 2939 | 1 | 6   | 17 | 5 | 537.77  | 566.92  | 28.66  | o |
| 2940 | 1 | 7   | 17 | 5 | 2408.39 | 2665.78 | 98.73  | o |
| 2941 | 1 | 8   | 17 | 5 | 6383.59 | 7389.03 | 394.93 | o |
| 2942 | 1 | 9   | 17 | 5 | 138.15  | 168.80  | 9.55   | o |
| 2943 | 1 | 10  | 17 | 5 | 179.02  | 171.99  | 22.29  | o |
| 2944 | 1 | 11  | 17 | 5 | 642.81  | 636.98  | 35.03  | o |
| 2945 | 1 | 12  | 17 | 5 | 92.63   | 89.18   | 15.92  | o |
| 2946 | 1 | -11 | 18 | 5 | 1.54    | 3.18    | 3.18   | < |
| 2947 | 1 | -10 | 18 | 5 | 140.78  | 143.32  | 44.59  | o |
| 2948 | 1 | -9  | 18 | 5 | 148.04  | 162.43  | 12.74  | o |
| 2949 | 1 | -8  | 18 | 5 | 160.96  | 187.91  | 12.74  | o |
| 2950 | 1 | -7  | 18 | 5 | 1.26    | 6.37    | 3.18   | < |
| 2951 | 1 | -6  | 18 | 5 | 1.01    | 0.00    | 3.18   | < |
| 2952 | 1 | -5  | 18 | 5 | 58.01   | 79.62   | 6.37   | o |
| 2953 | 1 | -4  | 18 | 5 | 1435.70 | 1742.16 | 66.88  | o |
| 2954 | 1 | -3  | 18 | 5 | 64.77   | 85.99   | 6.37   | o |
| 2955 | 1 | -2  | 18 | 5 | 472.77  | 417.23  | 15.92  | o |
| 2956 | 1 | -1  | 18 | 5 | 111.74  | 136.95  | 9.55   | o |
| 2957 | 1 | 0   | 18 | 5 | 249.58  | 289.83  | 12.74  | o |
| 2958 | 1 | 1   | 18 | 5 | 245.70  | 203.84  | 9.55   | o |
| 2959 | 1 | 2   | 18 | 5 | 246.38  | 350.34  | 15.92  | o |
| 2960 | 1 | 4   | 18 | 5 | 1439.37 | 1984.21 | 73.25  | o |
| 2961 | 1 | 6   | 18 | 5 | 2.00    | 6.37    | 3.18   | < |
| 2962 | 1 | 7   | 18 | 5 | 122.79  | 108.29  | 6.37   | o |
| 2963 | 1 | 8   | 18 | 5 | 13.15   | 25.48   | 6.37   | o |
| 2964 | 1 | 9   | 18 | 5 | 2.25    | 22.29   | 6.37   | o |
| 2965 | 1 | 10  | 18 | 5 | 300.58  | 328.05  | 22.29  | o |
| 2966 | 1 | 11  | 18 | 5 | 4.10    | 9.55    | 6.37   | < |
| 2967 | 1 | -11 | 19 | 5 | 149.89  | 203.84  | 92.36  | < |
| 2968 | 1 | -10 | 19 | 5 | 495.32  | 410.86  | 28.66  | o |
| 2969 | 1 | -9  | 19 | 5 | 2.48    | 25.48   | 6.37   | o |
| 2970 | 1 | -8  | 19 | 5 | 262.88  | 254.79  | 35.03  | o |
| 2971 | 1 | -7  | 19 | 5 | 967.96  | 907.70  | 31.85  | o |
| 2972 | 1 | -6  | 19 | 5 | 286.19  | 219.76  | 12.74  | o |
| 2973 | 1 | -5  | 19 | 5 | 755.39  | 802.60  | 28.66  | o |
| 2974 | 1 | -4  | 19 | 5 | 1372.59 | 1449.14 | 47.77  | o |
| 2975 | 1 | -2  | 19 | 5 | 3035.54 | 3350.54 | 121.03 | o |
| 2976 | 1 | -1  | 19 | 5 | 955.86  | 1197.53 | 41.40  | o |
| 2977 | 1 | 0   | 19 | 5 | 16.05   | 28.66   | 3.18   | o |
| 2978 | 1 | 1   | 19 | 5 | 1193.85 | 1277.16 | 41.40  | o |
| 2979 | 1 | 2   | 19 | 5 | 2797.98 | 3382.39 | 105.10 | o |
| 2980 | 1 | 4   | 19 | 5 | 1382.39 | 1519.21 | 50.96  | o |
| 2981 | 1 | 5   | 19 | 5 | 944.18  | 1066.95 | 38.22  | o |
| 2982 | 1 | 6   | 19 | 5 | 186.06  | 184.73  | 9.55   | o |
| 2983 | 1 | 7   | 19 | 5 | 756.50  | 694.31  | 28.66  | o |
| 2984 | 1 | 8   | 19 | 5 | 301.79  | 261.16  | 12.74  | o |
| 2985 | 1 | 9   | 19 | 5 | 10.53   | 28.66   | 6.37   | o |
| 2986 | 1 | 10  | 19 | 5 | 439.76  | 289.83  | 31.85  | o |
| 2987 | 1 | -10 | 20 | 5 | 36.56   | 63.70   | 9.55   | o |
| 2988 | 1 | -9  | 20 | 5 | 3.23    | 6.37    | 9.55   | < |
| 2989 | 1 | -8  | 20 | 5 | 222.51  | 257.98  | 38.22  | o |
| 2990 | 1 | -7  | 20 | 5 | 7.30    | 22.29   | 6.37   | o |
| 2991 | 1 | -6  | 20 | 5 | 288.55  | 238.87  | 12.74  | o |

|      |   |    |    |   |         |         |        |   |
|------|---|----|----|---|---------|---------|--------|---|
| 2992 | 1 | -5 | 20 | 5 | 407.86  | 388.56  | 22.29  | o |
| 2993 | 1 | -4 | 20 | 5 | 75.24   | 85.99   | 6.37   | o |
| 2994 | 1 | -2 | 20 | 5 | 429.73  | 426.78  | 19.11  | o |
| 2995 | 1 | -1 | 20 | 5 | 78.67   | 79.62   | 6.37   | o |
| 2996 | 1 | 0  | 20 | 5 | 639.87  | 783.49  | 28.66  | o |
| 2997 | 1 | 2  | 20 | 5 | 278.52  | 385.38  | 15.92  | o |
| 2998 | 1 | 3  | 20 | 5 | 318.14  | 248.42  | 12.74  | o |
| 2999 | 1 | 4  | 20 | 5 | 43.05   | 63.70   | 6.37   | o |
| 3000 | 1 | 5  | 20 | 5 | 135.87  | 191.10  | 12.74  | o |
| 3001 | 1 | 6  | 20 | 5 | 108.48  | 117.84  | 6.37   | o |
| 3002 | 1 | 7  | 20 | 5 | 34.45   | 44.59   | 6.37   | o |
| 3003 | 1 | 8  | 20 | 5 | 477.55  | 477.74  | 19.11  | o |
| 3004 | 1 | 9  | 20 | 5 | 112.49  | 117.84  | 9.55   | o |
| 3005 | 1 | -9 | 21 | 5 | 9.28    | 22.29   | 6.37   | o |
| 3006 | 1 | -8 | 21 | 5 | 217.38  | 194.28  | 15.92  | o |
| 3007 | 1 | -7 | 21 | 5 | 1013.61 | 888.59  | 85.99  | o |
| 3008 | 1 | -6 | 21 | 5 | 203.54  | 171.99  | 9.55   | o |
| 3009 | 1 | -5 | 21 | 5 | 1332.69 | 1108.35 | 44.59  | o |
| 3010 | 1 | -3 | 21 | 5 | 679.59  | 630.62  | 28.66  | o |
| 3011 | 1 | -2 | 21 | 5 | 1382.92 | 1614.76 | 54.14  | o |
| 3012 | 1 | 1  | 21 | 5 | 4565.74 | 4009.82 | 124.21 | o |
| 3013 | 1 | 2  | 21 | 5 | 1342.15 | 1735.79 | 57.33  | o |
| 3014 | 1 | 4  | 21 | 5 | 3553.38 | 3735.92 | 117.84 | o |
| 3015 | 1 | 5  | 21 | 5 | 729.18  | 834.45  | 31.85  | o |
| 3016 | 1 | 6  | 21 | 5 | 93.58   | 89.18   | 6.37   | o |
| 3017 | 1 | 7  | 21 | 5 | 1399.39 | 1296.27 | 44.59  | o |
| 3018 | 1 | 8  | 21 | 5 | 203.92  | 222.95  | 12.74  | o |
| 3019 | 1 | -8 | 22 | 5 | 143.91  | 140.14  | 25.48  | o |
| 3020 | 1 | -7 | 22 | 5 | 58.24   | 57.33   | 41.40  | < |
| 3021 | 1 | -6 | 22 | 5 | 89.90   | 98.73   | 6.37   | o |
| 3022 | 1 | -5 | 22 | 5 | 53.05   | 50.96   | 6.37   | o |
| 3023 | 1 | -4 | 22 | 5 | 476.23  | 544.62  | 22.29  | o |
| 3024 | 1 | -3 | 22 | 5 | 215.74  | 187.91  | 12.74  | o |
| 3025 | 1 | -2 | 22 | 5 | 1600.43 | 1926.88 | 63.70  | o |
| 3026 | 1 | 0  | 22 | 5 | 100.82  | 124.21  | 9.55   | o |
| 3027 | 1 | 1  | 22 | 5 | 358.44  | 318.49  | 19.11  | o |
| 3028 | 1 | 4  | 22 | 5 | 772.08  | 719.79  | 25.48  | o |
| 3029 | 1 | 5  | 22 | 5 | 14.80   | 31.85   | 3.18   | o |
| 3030 | 1 | 6  | 22 | 5 | 91.74   | 82.81   | 6.37   | o |
| 3031 | 1 | 7  | 22 | 5 | 360.09  | 277.09  | 15.92  | o |
| 3032 | 1 | 8  | 22 | 5 | 139.19  | 149.69  | 12.74  | o |
| 3033 | 1 | -7 | 23 | 5 | 543.82  | 442.70  | 22.29  | o |
| 3034 | 1 | -6 | 23 | 5 | 751.96  | 716.61  | 25.48  | o |
| 3035 | 1 | -5 | 23 | 5 | 283.71  | 280.27  | 22.29  | o |
| 3036 | 1 | -4 | 23 | 5 | 996.37  | 898.15  | 31.85  | o |
| 3037 | 1 | -3 | 23 | 5 | 131.88  | 140.14  | 9.55   | o |
| 3038 | 1 | -2 | 23 | 5 | 1640.14 | 1716.68 | 66.88  | o |
| 3039 | 1 | -1 | 23 | 5 | 7368.14 | 8701.22 | 264.35 | o |
| 3040 | 1 | 1  | 23 | 5 | 6322.43 | 8586.56 | 372.64 | o |
| 3041 | 1 | 2  | 23 | 5 | 1699.53 | 1818.59 | 60.51  | o |
| 3042 | 1 | 4  | 23 | 5 | 851.80  | 844.01  | 35.03  | o |
| 3043 | 1 | 5  | 23 | 5 | 480.36  | 426.78  | 19.11  | o |
| 3044 | 1 | 6  | 23 | 5 | 424.84  | 554.18  | 25.48  | o |
| 3045 | 1 | 7  | 23 | 5 | 162.75  | 111.47  | 12.74  | o |
| 3046 | 1 | 8  | 23 | 5 | 0.65    | 12.74   | 6.37   | < |
| 3047 | 1 | -7 | 24 | 5 | 155.68  | 181.54  | 22.29  | o |
| 3048 | 1 | -6 | 24 | 5 | 884.36  | 840.82  | 44.59  | o |
| 3049 | 1 | -5 | 24 | 5 | 22.30   | 47.77   | 6.37   | o |

|      |   |     |    |   |           |           |         |   |
|------|---|-----|----|---|-----------|-----------|---------|---|
| 3050 | 1 | -3  | 24 | 5 | 124.88    | 133.77    | 9.55    | o |
| 3051 | 1 | -2  | 24 | 5 | 597.36    | 678.39    | 28.66   | o |
| 3052 | 1 | -1  | 24 | 5 | 8.37      | 6.37      | 3.18    | < |
| 3053 | 1 | 0   | 24 | 5 | 376.05    | 410.86    | 15.92   | o |
| 3054 | 1 | 1   | 24 | 5 | 0.35      | 3.18      | 3.18    | < |
| 3055 | 1 | 2   | 24 | 5 | 784.32    | 847.19    | 31.85   | o |
| 3056 | 1 | 3   | 24 | 5 | 136.57    | 156.06    | 9.55    | o |
| 3057 | 1 | 4   | 24 | 5 | 48.69     | 57.33     | 6.37    | o |
| 3058 | 1 | 6   | 24 | 5 | 814.82    | 805.79    | 41.40   | o |
| 3059 | 1 | 7   | 24 | 5 | 437.31    | 401.30    | 25.48   | o |
| 3060 | 1 | -6  | 25 | 5 | 51.75     | 50.96     | 9.55    | o |
| 3061 | 1 | -5  | 25 | 5 | 178.29    | 121.03    | 12.74   | o |
| 3062 | 1 | -4  | 25 | 5 | 631.09    | 538.25    | 25.48   | o |
| 3063 | 1 | -2  | 25 | 5 | 674.71    | 633.80    | 25.48   | o |
| 3064 | 1 | -1  | 25 | 5 | 1144.11   | 1172.05   | 38.22   | o |
| 3065 | 1 | 0   | 25 | 5 | 8.24      | 9.55      | 3.18    | o |
| 3066 | 1 | 2   | 25 | 5 | 519.29    | 617.88    | 22.29   | o |
| 3067 | 1 | 4   | 25 | 5 | 587.96    | 528.70    | 28.66   | o |
| 3068 | 1 | 5   | 25 | 5 | 22.88     | 38.22     | 6.37    | o |
| 3069 | 1 | 6   | 25 | 5 | 61.15     | 70.07     | 9.55    | o |
| 3070 | 1 | 7   | 25 | 5 | 22.23     | 35.03     | 6.37    | o |
| 3071 | 1 | -6  | 26 | 5 | 5.27      | 3.18      | 6.37    | < |
| 3072 | 1 | -4  | 26 | 5 | 634.29    | 592.40    | 31.85   | o |
| 3073 | 1 | -3  | 26 | 5 | 340.80    | 293.01    | 19.11   | o |
| 3074 | 1 | -2  | 26 | 5 | 304.11    | 277.09    | 19.11   | o |
| 3075 | 1 | -1  | 26 | 5 | 92.55     | 159.25    | 9.55    | o |
| 3076 | 1 | 0   | 26 | 5 | 994.40    | 1223.01   | 47.77   | o |
| 3077 | 1 | 1   | 26 | 5 | 101.18    | 124.21    | 9.55    | o |
| 3078 | 1 | 2   | 26 | 5 | 165.64    | 194.28    | 15.92   | o |
| 3079 | 1 | 3   | 26 | 5 | 140.28    | 175.17    | 15.92   | o |
| 3080 | 1 | 4   | 26 | 5 | 501.55    | 496.85    | 28.66   | o |
| 3081 | 1 | 5   | 26 | 5 | 453.51    | 401.30    | 25.48   | o |
| 3082 | 1 | 6   | 26 | 5 | 0.65      | -3.18     | 3.18    | < |
| 3083 | 1 | -5  | 27 | 5 | 4817.19   | 5280.61   | 235.68  | o |
| 3084 | 1 | -4  | 27 | 5 | 399.90    | 337.60    | 22.29   | o |
| 3085 | 1 | -3  | 27 | 5 | 1315.68   | 1073.32   | 76.44   | o |
| 3086 | 1 | -2  | 27 | 5 | 593.96    | 672.02    | 54.14   | o |
| 3087 | 1 | -1  | 27 | 5 | 2972.78   | 2535.20   | 162.43  | o |
| 3088 | 1 | -10 | 0  | 6 | 671.24    | 732.53    | 47.77   | o |
| 3089 | 1 | -9  | 0  | 6 | 3036.08   | 2933.32   | 152.88  | o |
| 3090 | 1 | -8  | 0  | 6 | 48.28     | 22.29     | 73.25   | < |
| 3091 | 1 | -7  | 0  | 6 | 3716.88   | 4095.82   | 178.36  | o |
| 3092 | 1 | -6  | 0  | 6 | 3942.00   | 4710.51   | 203.84  | o |
| 3093 | 1 | -4  | 0  | 6 | 3268.90   | 3458.83   | 210.21  | o |
| 3094 | 1 | -3  | 0  | 6 | 64814.60  | 62087.00  | 3742.29 | o |
| 3095 | 1 | -1  | 0  | 6 | 1552.41   | 1993.76   | 89.18   | o |
| 3096 | 1 | 0   | 0  | 6 | 131030.00 | 136047.00 | 5793.38 | o |
| 3097 | 1 | 1   | 0  | 6 | 1844.99   | 1786.74   | 79.62   | o |
| 3098 | 1 | 3   | 0  | 6 | 46708.70  | 48388.60  | 2063.83 | o |
| 3099 | 1 | 4   | 0  | 6 | 5716.10   | 5331.57   | 328.05  | o |
| 3100 | 1 | 6   | 0  | 6 | 2610.88   | 2417.36   | 105.10  | o |
| 3101 | 1 | 7   | 0  | 6 | 5780.06   | 6057.73   | 261.16  | o |
| 3102 | 1 | 8   | 0  | 6 | 951.88    | 1194.35   | 57.33   | o |
| 3103 | 1 | 9   | 0  | 6 | 2523.50   | 2509.72   | 114.66  | o |
| 3104 | 1 | 10  | 0  | 6 | 37.02     | 44.59     | 28.66   | < |
| 3105 | 1 | 11  | 0  | 6 | 10.55     | 6.37      | 12.74   | < |
| 3106 | 1 | 12  | 0  | 6 | 844.66    | 707.05    | 108.29  | o |
| 3107 | 1 | -10 | 1  | 6 | 556.87    | 554.18    | 35.03   | o |

|      |   |     |   |   |          |          |         |   |
|------|---|-----|---|---|----------|----------|---------|---|
| 3108 | 1 | -9  | 1 | 6 | 486.20   | 420.41   | 47.77   | o |
| 3109 | 1 | -8  | 1 | 6 | 574.95   | 541.44   | 22.29   | o |
| 3110 | 1 | -7  | 1 | 6 | 11.20    | 12.74    | 3.18    | o |
| 3111 | 1 | -6  | 1 | 6 | 181.51   | 200.65   | 9.55    | o |
| 3112 | 1 | -5  | 1 | 6 | 596.34   | 582.84   | 22.29   | o |
| 3113 | 1 | -4  | 1 | 6 | 528.34   | 525.51   | 28.66   | o |
| 3114 | 1 | -3  | 1 | 6 | 201.51   | 207.02   | 9.55    | o |
| 3115 | 1 | -2  | 1 | 6 | 709.12   | 879.04   | 31.85   | o |
| 3116 | 1 | -1  | 1 | 6 | 496.51   | 636.98   | 22.29   | o |
| 3117 | 1 | 0   | 1 | 6 | 294.47   | 286.64   | 9.55    | o |
| 3118 | 1 | 1   | 1 | 6 | 1673.54  | 1382.26  | 44.59   | o |
| 3119 | 1 | 2   | 1 | 6 | 651.02   | 691.13   | 22.29   | o |
| 3120 | 1 | 3   | 1 | 6 | 1.61     | 6.37     | 3.18    | < |
| 3121 | 1 | 4   | 1 | 6 | 167.57   | 136.95   | 9.55    | o |
| 3122 | 1 | 5   | 1 | 6 | 684.34   | 646.54   | 22.29   | o |
| 3123 | 1 | 6   | 1 | 6 | 21.18    | 0.00     | 19.11   | < |
| 3124 | 1 | 7   | 1 | 6 | 9.35     | 12.74    | 3.18    | o |
| 3125 | 1 | 8   | 1 | 6 | 191.09   | 197.46   | 12.74   | o |
| 3126 | 1 | 9   | 1 | 6 | 1436.57  | 1796.30  | 66.88   | o |
| 3127 | 1 | 10  | 1 | 6 | 248.24   | 235.68   | 19.11   | o |
| 3128 | 1 | 11  | 1 | 6 | 238.29   | 257.98   | 12.74   | o |
| 3129 | 1 | 12  | 1 | 6 | 197.85   | 187.91   | 9.55    | o |
| 3130 | 1 | -10 | 2 | 6 | 10623.40 | 12112.30 | 519.14  | o |
| 3131 | 1 | -9  | 2 | 6 | 85.81    | 213.39   | 31.85   | o |
| 3132 | 1 | -8  | 2 | 6 | 5378.85  | 5697.83  | 200.65  | o |
| 3133 | 1 | -7  | 2 | 6 | 557.50   | 493.66   | 19.11   | o |
| 3134 | 1 | -6  | 2 | 6 | 44.51    | 44.59    | 3.18    | o |
| 3135 | 1 | -5  | 2 | 6 | 1850.54  | 1703.94  | 54.14   | o |
| 3136 | 1 | -4  | 2 | 6 | 29775.90 | 28740.80 | 926.81  | o |
| 3137 | 1 | -2  | 2 | 6 | 40276.00 | 40563.20 | 1410.92 | o |
| 3138 | 1 | -1  | 2 | 6 | 103.44   | 101.92   | 6.37    | o |
| 3139 | 1 | 0   | 2 | 6 | 2827.58  | 3468.39  | 108.29  | o |
| 3140 | 1 | 1   | 2 | 6 | 73.32    | 66.88    | 6.37    | o |
| 3141 | 1 | 2   | 2 | 6 | 38249.20 | 35722.10 | 1079.69 | o |
| 3142 | 1 | 4   | 2 | 6 | 27353.80 | 25489.00 | 888.59  | o |
| 3143 | 1 | 5   | 2 | 6 | 1779.06  | 1506.47  | 57.33   | o |
| 3144 | 1 | 6   | 2 | 6 | 145.32   | 143.32   | 6.37    | o |
| 3145 | 1 | 7   | 2 | 6 | 664.84   | 547.81   | 19.11   | o |
| 3146 | 1 | 8   | 2 | 6 | 7142.84  | 7647.01  | 248.42  | o |
| 3147 | 1 | 9   | 2 | 6 | 405.07   | 525.51   | 22.29   | o |
| 3148 | 1 | 10  | 2 | 6 | 9136.03  | 10195.00 | 308.94  | o |
| 3149 | 1 | 12  | 2 | 6 | 728.07   | 748.46   | 89.18   | o |
| 3150 | 1 | -11 | 3 | 6 | 131.44   | 124.21   | 44.59   | < |
| 3151 | 1 | -10 | 3 | 6 | 729.08   | 812.16   | 54.14   | o |
| 3152 | 1 | -9  | 3 | 6 | 6.13     | 6.37     | 12.74   | < |
| 3153 | 1 | -8  | 3 | 6 | 260.33   | 213.39   | 9.55    | o |
| 3154 | 1 | -7  | 3 | 6 | 57.44    | 60.51    | 3.18    | o |
| 3155 | 1 | -6  | 3 | 6 | 387.35   | 401.30   | 15.92   | o |
| 3156 | 1 | -5  | 3 | 6 | 16.21    | 15.92    | 3.18    | o |
| 3157 | 1 | -4  | 3 | 6 | 309.11   | 245.24   | 9.55    | o |
| 3158 | 1 | -3  | 3 | 6 | 996.68   | 1305.82  | 47.77   | o |
| 3159 | 1 | -2  | 3 | 6 | 1911.04  | 1764.45  | 63.70   | o |
| 3160 | 1 | -1  | 3 | 6 | 1911.26  | 1936.44  | 60.51   | o |
| 3161 | 1 | 0   | 3 | 6 | 1.93     | 12.74    | 3.18    | o |
| 3162 | 1 | 1   | 3 | 6 | 2276.02  | 2054.28  | 73.25   | o |
| 3163 | 1 | 2   | 3 | 6 | 556.70   | 643.35   | 25.48   | o |
| 3164 | 1 | 3   | 3 | 6 | 3281.41  | 2882.36  | 127.40  | o |
| 3165 | 1 | 4   | 3 | 6 | 147.06   | 133.77   | 9.55    | o |

|      |   |     |   |   |          |          |         |   |
|------|---|-----|---|---|----------|----------|---------|---|
| 3166 | 1 | 5   | 3 | 6 | 2.17     | 3.18     | 3.18    | < |
| 3167 | 1 | 6   | 3 | 6 | 38.83    | 35.03    | 41.40   | < |
| 3168 | 1 | 7   | 3 | 6 | 92.77    | 70.07    | 6.37    | o |
| 3169 | 1 | 8   | 3 | 6 | 149.63   | 130.58   | 12.74   | o |
| 3170 | 1 | 9   | 3 | 6 | 33.24    | 38.22    | 3.18    | o |
| 3171 | 1 | 10  | 3 | 6 | 311.38   | 261.16   | 19.11   | o |
| 3172 | 1 | 11  | 3 | 6 | 346.01   | 343.97   | 28.66   | o |
| 3173 | 1 | 12  | 3 | 6 | 351.46   | 363.08   | 465.00  | < |
| 3174 | 1 | -12 | 4 | 6 | 4422.19  | 5608.66  | 340.79  | o |
| 3175 | 1 | -11 | 4 | 6 | 46.95    | 54.14    | 324.86  | < |
| 3176 | 1 | -10 | 4 | 6 | 31.25    | 38.22    | 149.69  | < |
| 3177 | 1 | -9  | 4 | 6 | 3422.75  | 3312.32  | 321.68  | o |
| 3178 | 1 | -8  | 4 | 6 | 1011.68  | 1057.40  | 38.22   | o |
| 3179 | 1 | -7  | 4 | 6 | 214.50   | 277.09   | 12.74   | o |
| 3180 | 1 | -6  | 4 | 6 | 6211.76  | 6748.86  | 238.87  | o |
| 3181 | 1 | -5  | 4 | 6 | 324.51   | 267.53   | 12.74   | o |
| 3182 | 1 | -4  | 4 | 6 | 4265.12  | 4936.64  | 175.17  | o |
| 3183 | 1 | -3  | 4 | 6 | 16014.30 | 16765.50 | 586.03  | o |
| 3184 | 1 | -2  | 4 | 6 | 11997.00 | 11679.10 | 353.53  | o |
| 3185 | 1 | 0   | 4 | 6 | 58609.40 | 60937.20 | 1837.70 | o |
| 3186 | 1 | 2   | 4 | 6 | 10541.10 | 10558.00 | 452.26  | o |
| 3187 | 1 | 3   | 4 | 6 | 14726.60 | 15163.40 | 531.88  | o |
| 3188 | 1 | 4   | 4 | 6 | 7174.85  | 7392.22  | 261.16  | o |
| 3189 | 1 | 5   | 4 | 6 | 39.43    | 22.29    | 47.77   | < |
| 3190 | 1 | 6   | 4 | 6 | 9589.05  | 9452.86  | 286.64  | o |
| 3191 | 1 | 7   | 4 | 6 | 936.72   | 1019.18  | 35.03   | o |
| 3192 | 1 | 8   | 4 | 6 | 191.86   | 152.88   | 41.40   | o |
| 3193 | 1 | 9   | 4 | 6 | 2956.58  | 3210.41  | 108.29  | o |
| 3194 | 1 | 10  | 4 | 6 | 389.49   | 372.64   | 15.92   | o |
| 3195 | 1 | 11  | 4 | 6 | 402.82   | 477.74   | 19.11   | o |
| 3196 | 1 | 12  | 4 | 6 | 2931.35  | 2914.21  | 127.40  | o |
| 3197 | 1 | -12 | 5 | 6 | 336.87   | 385.38   | 19.11   | o |
| 3198 | 1 | -11 | 5 | 6 | 215.82   | 210.21   | 73.25   | < |
| 3199 | 1 | -10 | 5 | 6 | 735.00   | 652.91   | 729.35  | < |
| 3200 | 1 | -9  | 5 | 6 | 3.69     | 0.00     | 3.18    | < |
| 3201 | 1 | -8  | 5 | 6 | 34.65    | 31.85    | 3.18    | o |
| 3202 | 1 | -7  | 5 | 6 | 480.27   | 404.49   | 111.47  | o |
| 3203 | 1 | -6  | 5 | 6 | 438.27   | 461.81   | 15.92   | o |
| 3204 | 1 | -5  | 5 | 6 | 2.24     | 0.00     | 6.37    | < |
| 3205 | 1 | -4  | 5 | 6 | 46.52    | 57.33    | 6.37    | o |
| 3206 | 1 | -3  | 5 | 6 | 443.14   | 576.47   | 22.29   | o |
| 3207 | 1 | -2  | 5 | 6 | 2123.38  | 1898.22  | 70.07   | o |
| 3208 | 1 | -1  | 5 | 6 | 1863.34  | 1863.18  | 66.88   | o |
| 3209 | 1 | 0   | 5 | 6 | 97.84    | 162.43   | 12.74   | o |
| 3210 | 1 | 1   | 5 | 6 | 760.61   | 930.00   | 44.59   | o |
| 3211 | 1 | 3   | 5 | 6 | 1027.18  | 984.14   | 38.22   | o |
| 3212 | 1 | 4   | 5 | 6 | 28.12    | 38.22    | 3.18    | o |
| 3213 | 1 | 5   | 5 | 6 | 159.45   | 140.14   | 6.37    | o |
| 3214 | 1 | 6   | 5 | 6 | 4.91     | -6.37    | 35.03   | < |
| 3215 | 1 | 7   | 5 | 6 | 1034.56  | 1111.54  | 38.22   | o |
| 3216 | 1 | 8   | 5 | 6 | 46.20    | 54.14    | 6.37    | o |
| 3217 | 1 | 9   | 5 | 6 | 38.36    | 41.40    | 3.18    | o |
| 3218 | 1 | 10  | 5 | 6 | 627.38   | 614.69   | 31.85   | o |
| 3219 | 1 | 11  | 5 | 6 | 452.23   | 452.26   | 19.11   | o |
| 3220 | 1 | 12  | 5 | 6 | 56.33    | 44.59    | 54.14   | < |
| 3221 | 1 | -12 | 6 | 6 | 343.85   | 369.45   | 25.48   | o |
| 3222 | 1 | -11 | 6 | 6 | 119.34   | 130.58   | 9.55    | o |
| 3223 | 1 | -10 | 6 | 6 | 7797.99  | 8452.80  | 366.27  | o |

|      |   |     |   |   |          |          |         |   |
|------|---|-----|---|---|----------|----------|---------|---|
| 3224 | 1 | -9  | 6 | 6 | 876.76   | 1057.40  | 82.81   | o |
| 3225 | 1 | -8  | 6 | 6 | 4365.61  | 4595.85  | 140.14  | o |
| 3226 | 1 | -7  | 6 | 6 | 356.02   | 248.42   | 12.74   | o |
| 3227 | 1 | -6  | 6 | 6 | 15.37    | 38.22    | 12.74   | o |
| 3228 | 1 | -5  | 6 | 6 | 3271.37  | 3318.69  | 117.84  | o |
| 3229 | 1 | -4  | 6 | 6 | 18902.30 | 20071.40 | 646.54  | o |
| 3230 | 1 | -2  | 6 | 6 | 36821.20 | 43066.60 | 1296.27 | o |
| 3231 | 1 | -1  | 6 | 6 | 3056.75  | 3032.05  | 108.29  | o |
| 3232 | 1 | 0   | 6 | 6 | 23156.10 | 24683.20 | 1054.21 | o |
| 3233 | 1 | 1   | 6 | 6 | 1807.70  | 2207.15  | 70.07   | o |
| 3234 | 1 | 2   | 6 | 6 | 39374.30 | 41849.90 | 1264.42 | o |
| 3235 | 1 | 3   | 6 | 6 | 1207.34  | 1602.02  | 50.96   | o |
| 3236 | 1 | 4   | 6 | 6 | 15947.50 | 16380.10 | 493.66  | o |
| 3237 | 1 | 5   | 6 | 6 | 1693.15  | 1675.27  | 54.14   | o |
| 3238 | 1 | 7   | 6 | 6 | 597.29   | 576.47   | 22.29   | o |
| 3239 | 1 | 8   | 6 | 6 | 3185.56  | 3372.84  | 105.10  | o |
| 3240 | 1 | 9   | 6 | 6 | 1505.73  | 1729.42  | 66.88   | o |
| 3241 | 1 | 10  | 6 | 6 | 9790.54  | 10847.90 | 353.53  | o |
| 3242 | 1 | 11  | 6 | 6 | 5.86     | 19.11    | 57.33   | < |
| 3243 | 1 | 12  | 6 | 6 | 80.61    | 57.33    | 207.02  | < |
| 3244 | 1 | -12 | 7 | 6 | 121.26   | 146.51   | 12.74   | o |
| 3245 | 1 | -11 | 7 | 6 | 54.72    | 35.03    | 267.53  | < |
| 3246 | 1 | -10 | 7 | 6 | 143.78   | 130.58   | 9.55    | o |
| 3247 | 1 | -9  | 7 | 6 | 212.60   | 197.46   | 44.59   | o |
| 3248 | 1 | -8  | 7 | 6 | 209.81   | 191.10   | 9.55    | o |
| 3249 | 1 | -7  | 7 | 6 | 286.54   | 238.87   | 12.74   | o |
| 3250 | 1 | -6  | 7 | 6 | 12.41    | 12.74    | 3.18    | o |
| 3251 | 1 | -5  | 7 | 6 | 47.90    | 38.22    | 3.18    | o |
| 3252 | 1 | -4  | 7 | 6 | 570.77   | 592.40   | 22.29   | o |
| 3253 | 1 | -3  | 7 | 6 | 149.09   | 133.77   | 6.37    | o |
| 3254 | 1 | -2  | 7 | 6 | 909.15   | 783.49   | 31.85   | o |
| 3255 | 1 | -1  | 7 | 6 | 814.95   | 996.88   | 38.22   | o |
| 3256 | 1 | 0   | 7 | 6 | 232.42   | 267.53   | 9.55    | o |
| 3257 | 1 | 1   | 7 | 6 | 866.55   | 968.22   | 31.85   | o |
| 3258 | 1 | 3   | 7 | 6 | 33.16    | 31.85    | 3.18    | o |
| 3259 | 1 | 4   | 7 | 6 | 784.26   | 722.98   | 25.48   | o |
| 3260 | 1 | 5   | 7 | 6 | 42.04    | 50.96    | 3.18    | o |
| 3261 | 1 | 6   | 7 | 6 | 23.70    | 19.11    | 3.18    | o |
| 3262 | 1 | 7   | 7 | 6 | 615.36   | 659.28   | 22.29   | o |
| 3263 | 1 | 8   | 7 | 6 | 108.19   | 124.21   | 168.80  | < |
| 3264 | 1 | 9   | 7 | 6 | 589.36   | 595.58   | 82.81   | o |
| 3265 | 1 | 10  | 7 | 6 | 76.18    | 95.55    | 19.11   | o |
| 3266 | 1 | 11  | 7 | 6 | 391.07   | 385.38   | 19.11   | o |
| 3267 | 1 | 12  | 7 | 6 | 34.94    | 25.48    | 6.37    | o |
| 3268 | 1 | -12 | 8 | 6 | 2909.77  | 3417.43  | 156.06  | o |
| 3269 | 1 | -11 | 8 | 6 | 194.74   | 200.65   | 66.88   | o |
| 3270 | 1 | -10 | 8 | 6 | 470.39   | 401.30   | 105.10  | o |
| 3271 | 1 | -9  | 8 | 6 | 51.15    | 54.14    | 6.37    | o |
| 3272 | 1 | -8  | 8 | 6 | 2274.94  | 2363.22  | 73.25   | o |
| 3273 | 1 | -7  | 8 | 6 | 53.89    | 82.81    | 6.37    | o |
| 3274 | 1 | -6  | 8 | 6 | 11907.80 | 11328.80 | 398.12  | o |
| 3275 | 1 | -5  | 8 | 6 | 125.70   | 133.77   | 6.37    | o |
| 3276 | 1 | -4  | 8 | 6 | 4460.32  | 4449.34  | 136.95  | o |
| 3277 | 1 | -3  | 8 | 6 | 359.05   | 493.66   | 22.29   | o |
| 3278 | 1 | -1  | 8 | 6 | 3025.98  | 3904.72  | 121.03  | o |
| 3279 | 1 | 0   | 8 | 6 | 21039.20 | 23422.00 | 710.24  | o |
| 3280 | 1 | 1   | 8 | 6 | 4285.72  | 4567.19  | 140.14  | o |
| 3281 | 1 | 2   | 8 | 6 | 398.48   | 388.56   | 15.92   | o |

|      |   |     |    |   |          |          |         |   |
|------|---|-----|----|---|----------|----------|---------|---|
| 3282 | 1 | 3   | 8  | 6 | 818.69   | 758.01   | 25.48   | o |
| 3283 | 1 | 4   | 8  | 6 | 2997.33  | 2965.17  | 98.73   | o |
| 3284 | 1 | 5   | 8  | 6 | 94.49    | 101.92   | 6.37    | o |
| 3285 | 1 | 6   | 8  | 6 | 10883.90 | 10523.00 | 340.79  | o |
| 3286 | 1 | 8   | 8  | 6 | 2997.34  | 3181.74  | 98.73   | o |
| 3287 | 1 | 9   | 8  | 6 | 0.67     | 25.48    | 9.55    | < |
| 3288 | 1 | 10  | 8  | 6 | 840.17   | 802.60   | 31.85   | o |
| 3289 | 1 | 11  | 8  | 6 | 189.45   | 238.87   | 50.96   | o |
| 3290 | 1 | 12  | 8  | 6 | 3378.72  | 4054.41  | 366.27  | o |
| 3291 | 1 | -12 | 9  | 6 | 821.93   | 1009.62  | 124.21  | o |
| 3292 | 1 | -11 | 9  | 6 | 29.14    | 22.29    | 6.37    | o |
| 3293 | 1 | -10 | 9  | 6 | 194.99   | 162.43   | 12.74   | o |
| 3294 | 1 | -9  | 9  | 6 | 131.22   | 121.03   | 66.88   | < |
| 3295 | 1 | -8  | 9  | 6 | 698.69   | 582.84   | 19.11   | o |
| 3296 | 1 | -7  | 9  | 6 | 17.02    | 15.92    | 31.85   | < |
| 3297 | 1 | -6  | 9  | 6 | 0.23     | 0.00     | 3.18    | < |
| 3298 | 1 | -5  | 9  | 6 | 244.78   | 257.98   | 12.74   | o |
| 3299 | 1 | -4  | 9  | 6 | 2810.36  | 2777.26  | 98.73   | o |
| 3300 | 1 | -3  | 9  | 6 | 133.72   | 101.92   | 6.37    | o |
| 3301 | 1 | 1   | 9  | 6 | 3412.02  | 3627.63  | 111.47  | o |
| 3302 | 1 | 2   | 9  | 6 | 206.31   | 216.57   | 12.74   | o |
| 3303 | 1 | 3   | 9  | 6 | 21.88    | 28.66    | 3.18    | o |
| 3304 | 1 | 4   | 9  | 6 | 571.23   | 678.39   | 25.48   | o |
| 3305 | 1 | 5   | 9  | 6 | 1330.34  | 1229.38  | 41.40   | o |
| 3306 | 1 | 6   | 9  | 6 | 0.54     | 3.18     | 3.18    | < |
| 3307 | 1 | 7   | 9  | 6 | 55.64    | 47.77    | 3.18    | o |
| 3308 | 1 | 8   | 9  | 6 | 262.45   | 219.76   | 73.25   | o |
| 3309 | 1 | 9   | 9  | 6 | 202.11   | 194.28   | 9.55    | o |
| 3310 | 1 | 10  | 9  | 6 | 53.07    | 50.96    | 22.29   | < |
| 3311 | 1 | 11  | 9  | 6 | 51.85    | 60.51    | 6.37    | o |
| 3312 | 1 | 12  | 9  | 6 | 655.62   | 624.25   | 108.29  | o |
| 3313 | 1 | -12 | 10 | 6 | 377.31   | 340.79   | 31.85   | o |
| 3314 | 1 | -11 | 10 | 6 | 24.65    | 47.77    | 9.55    | o |
| 3315 | 1 | -10 | 10 | 6 | 11476.00 | 12914.90 | 640.17  | o |
| 3316 | 1 | -9  | 10 | 6 | 621.38   | 662.47   | 57.33   | o |
| 3317 | 1 | -8  | 10 | 6 | 2659.76  | 2334.55  | 165.62  | o |
| 3318 | 1 | -7  | 10 | 6 | 3670.46  | 3261.37  | 117.84  | o |
| 3319 | 1 | -6  | 10 | 6 | 314.24   | 286.64   | 19.11   | o |
| 3320 | 1 | -5  | 10 | 6 | 1353.53  | 1245.31  | 47.77   | o |
| 3321 | 1 | -4  | 10 | 6 | 18725.60 | 22218.10 | 668.84  | o |
| 3322 | 1 | -2  | 10 | 6 | 24830.50 | 27463.60 | 828.08  | o |
| 3323 | 1 | -1  | 10 | 6 | 6437.54  | 7475.02  | 229.32  | o |
| 3324 | 1 | 0   | 10 | 6 | 45081.90 | 51920.70 | 1566.98 | o |
| 3325 | 1 | 1   | 10 | 6 | 6537.62  | 7682.04  | 235.68  | o |
| 3326 | 1 | 2   | 10 | 6 | 19633.70 | 22702.20 | 796.23  | o |
| 3327 | 1 | 4   | 10 | 6 | 20788.60 | 23950.70 | 726.16  | o |
| 3328 | 1 | 5   | 10 | 6 | 516.59   | 519.14   | 19.11   | o |
| 3329 | 1 | 6   | 10 | 6 | 1239.21  | 1264.42  | 41.40   | o |
| 3330 | 1 | 7   | 10 | 6 | 2679.04  | 2799.55  | 89.18   | o |
| 3331 | 1 | 8   | 10 | 6 | 4651.74  | 4624.51  | 146.51  | o |
| 3332 | 1 | 9   | 10 | 6 | 1943.05  | 2143.46  | 70.07   | o |
| 3333 | 1 | 10  | 10 | 6 | 7796.71  | 8787.21  | 267.53  | o |
| 3334 | 1 | 11  | 10 | 6 | 71.25    | 60.51    | 6.37    | o |
| 3335 | 1 | 12  | 10 | 6 | 789.62   | 770.75   | 76.44   | o |
| 3336 | 1 | -12 | 11 | 6 | 148.20   | 194.28   | 22.29   | o |
| 3337 | 1 | -11 | 11 | 6 | 107.88   | 108.29   | 12.74   | o |
| 3338 | 1 | -10 | 11 | 6 | 131.08   | 108.29   | 22.29   | o |
| 3339 | 1 | -9  | 11 | 6 | 190.40   | 171.99   | 66.88   | < |



|      |   |     |    |   |          |          |        |   |
|------|---|-----|----|---|----------|----------|--------|---|
| 3340 | 1 | -8  | 11 | 6 | 574.33   | 490.48   | 22.29  | o |
| 3341 | 1 | -7  | 11 | 6 | 54.77    | 41.40    | 15.92  | < |
| 3342 | 1 | -6  | 11 | 6 | 2.49     | 19.11    | 9.55   | < |
| 3343 | 1 | -5  | 11 | 6 | 692.37   | 742.09   | 25.48  | o |
| 3344 | 1 | -4  | 11 | 6 | 96.25    | 95.55    | 6.37   | o |
| 3345 | 1 | -3  | 11 | 6 | 65.63    | 57.33    | 3.18   | o |
| 3346 | 1 | -2  | 11 | 6 | 148.74   | 152.88   | 9.55   | o |
| 3347 | 1 | -1  | 11 | 6 | 441.29   | 522.33   | 19.11  | o |
| 3348 | 1 | 1   | 11 | 6 | 457.95   | 573.29   | 22.29  | o |
| 3349 | 1 | 2   | 11 | 6 | 141.36   | 175.17   | 9.55   | o |
| 3350 | 1 | 3   | 11 | 6 | 0.97     | 12.74    | 3.18   | o |
| 3351 | 1 | 4   | 11 | 6 | 26.97    | 44.59    | 3.18   | o |
| 3352 | 1 | 5   | 11 | 6 | 1260.53  | 1280.34  | 41.40  | o |
| 3353 | 1 | 6   | 11 | 6 | 47.58    | 66.88    | 6.37   | o |
| 3354 | 1 | 7   | 11 | 6 | 121.11   | 101.92   | 6.37   | o |
| 3355 | 1 | 8   | 11 | 6 | 242.74   | 197.46   | 22.29  | o |
| 3356 | 1 | 9   | 11 | 6 | 253.60   | 213.39   | 101.92 | < |
| 3357 | 1 | 10  | 11 | 6 | 90.37    | 79.62    | 66.88  | < |
| 3358 | 1 | 11  | 11 | 6 | 4.98     | 3.18     | 6.37   | < |
| 3359 | 1 | 12  | 11 | 6 | 107.05   | 101.92   | 117.84 | < |
| 3360 | 1 | -12 | 12 | 6 | 848.78   | 898.15   | 50.96  | o |
| 3361 | 1 | -11 | 12 | 6 | 71.32    | 66.88    | 6.37   | o |
| 3362 | 1 | -10 | 12 | 6 | 43.47    | 47.77    | 6.37   | o |
| 3363 | 1 | -9  | 12 | 6 | 1761.01  | 1426.85  | 216.57 | o |
| 3364 | 1 | -8  | 12 | 6 | 552.88   | 385.38   | 19.11  | o |
| 3365 | 1 | -7  | 12 | 6 | 4222.69  | 4293.28  | 143.32 | o |
| 3366 | 1 | -6  | 12 | 6 | 7837.34  | 7908.17  | 340.79 | o |
| 3367 | 1 | -5  | 12 | 6 | 1550.87  | 1273.97  | 41.40  | o |
| 3368 | 1 | -4  | 12 | 6 | 50.24    | 82.81    | 6.37   | o |
| 3369 | 1 | -3  | 12 | 6 | 10968.00 | 12147.30 | 369.45 | o |
| 3370 | 1 | -1  | 12 | 6 | 3081.65  | 3570.30  | 127.40 | o |
| 3371 | 1 | 0   | 12 | 6 | 23702.40 | 27912.70 | 844.01 | o |
| 3372 | 1 | 1   | 12 | 6 | 2703.49  | 3334.62  | 105.10 | o |
| 3373 | 1 | 3   | 12 | 6 | 9402.10  | 11453.00 | 350.34 | o |
| 3374 | 1 | 5   | 12 | 6 | 1104.26  | 1117.91  | 38.22  | o |
| 3375 | 1 | 6   | 12 | 6 | 9173.31  | 10287.30 | 312.12 | o |
| 3376 | 1 | 7   | 12 | 6 | 4450.75  | 4720.06  | 168.80 | o |
| 3377 | 1 | 8   | 12 | 6 | 573.68   | 484.11   | 54.14  | o |
| 3378 | 1 | 9   | 12 | 6 | 2384.06  | 2309.07  | 76.44  | o |
| 3379 | 1 | 10  | 12 | 6 | 47.00    | 44.59    | 28.66  | < |
| 3380 | 1 | 11  | 12 | 6 | 45.25    | 41.40    | 12.74  | o |
| 3381 | 1 | 12  | 12 | 6 | 738.42   | 754.83   | 105.10 | o |
| 3382 | 1 | -11 | 13 | 6 | 116.00   | 136.95   | 41.40  | o |
| 3383 | 1 | -10 | 13 | 6 | 403.73   | 423.60   | 25.48  | o |
| 3384 | 1 | -9  | 13 | 6 | 27.15    | 22.29    | 47.77  | < |
| 3385 | 1 | -8  | 13 | 6 | 46.03    | 41.40    | 3.18   | o |
| 3386 | 1 | -7  | 13 | 6 | 555.31   | 487.29   | 50.96  | o |
| 3387 | 1 | -6  | 13 | 6 | 490.31   | 423.60   | 15.92  | o |
| 3388 | 1 | -5  | 13 | 6 | 17.62    | 15.92    | 3.18   | o |
| 3389 | 1 | -4  | 13 | 6 | 127.74   | 111.47   | 6.37   | o |
| 3390 | 1 | -3  | 13 | 6 | 27.38    | 63.70    | 6.37   | o |
| 3391 | 1 | -1  | 13 | 6 | 627.57   | 541.44   | 22.29  | o |
| 3392 | 1 | 0   | 13 | 6 | 1.15     | 9.55     | 3.18   | o |
| 3393 | 1 | 2   | 13 | 6 | 1836.33  | 1729.42  | 57.33  | o |
| 3394 | 1 | 3   | 13 | 6 | 161.69   | 159.25   | 9.55   | o |
| 3395 | 1 | 4   | 13 | 6 | 47.19    | 44.59    | 6.37   | o |
| 3396 | 1 | 5   | 13 | 6 | 98.00    | 98.73    | 6.37   | o |
| 3397 | 1 | 6   | 13 | 6 | 171.49   | 187.91   | 9.55   | o |

|      |   |     |    |   |          |          |         |   |
|------|---|-----|----|---|----------|----------|---------|---|
| 3398 | 1 | 7   | 13 | 6 | 656.30   | 656.09   | 25.48   | o |
| 3399 | 1 | 8   | 13 | 6 | 30.10    | 22.29    | 6.37    | o |
| 3400 | 1 | 9   | 13 | 6 | 332.50   | 334.42   | 15.92   | o |
| 3401 | 1 | 10  | 13 | 6 | 239.12   | 213.39   | 35.03   | o |
| 3402 | 1 | 11  | 13 | 6 | 592.06   | 636.98   | 44.59   | o |
| 3403 | 1 | 12  | 13 | 6 | 51.29    | 82.81    | 9.55    | o |
| 3404 | 1 | -11 | 14 | 6 | 69.53    | 130.58   | 12.74   | o |
| 3405 | 1 | -10 | 14 | 6 | 3435.09  | 3366.47  | 149.69  | o |
| 3406 | 1 | -9  | 14 | 6 | 77.14    | 127.40   | 22.29   | o |
| 3407 | 1 | -8  | 14 | 6 | 4309.73  | 4446.16  | 136.95  | o |
| 3408 | 1 | -7  | 14 | 6 | 756.59   | 640.17   | 22.29   | o |
| 3409 | 1 | -6  | 14 | 6 | 416.63   | 305.75   | 95.55   | o |
| 3410 | 1 | -5  | 14 | 6 | 163.22   | 162.43   | 9.55    | o |
| 3411 | 1 | -4  | 14 | 6 | 9753.59  | 9710.84  | 296.20  | o |
| 3412 | 1 | -2  | 14 | 6 | 16602.20 | 20839.00 | 729.35  | o |
| 3413 | 1 | -1  | 14 | 6 | 5214.43  | 5911.23  | 210.21  | o |
| 3414 | 1 | 0   | 14 | 6 | 10490.10 | 13160.10 | 401.30  | o |
| 3415 | 1 | 2   | 14 | 6 | 19728.30 | 22759.50 | 796.23  | o |
| 3416 | 1 | 4   | 14 | 6 | 6803.18  | 7847.66  | 347.16  | o |
| 3417 | 1 | 6   | 14 | 6 | 1282.91  | 1140.20  | 38.22   | o |
| 3418 | 1 | 7   | 14 | 6 | 268.82   | 283.46   | 12.74   | o |
| 3419 | 1 | 8   | 14 | 6 | 2680.96  | 2875.99  | 105.10  | o |
| 3420 | 1 | 9   | 14 | 6 | 338.88   | 375.82   | 15.92   | o |
| 3421 | 1 | 10  | 14 | 6 | 5103.14  | 4841.09  | 184.73  | o |
| 3422 | 1 | 12  | 14 | 6 | 177.63   | 184.73   | 85.99   | < |
| 3423 | 1 | -11 | 15 | 6 | 325.30   | 394.93   | 35.03   | o |
| 3424 | 1 | -10 | 15 | 6 | 455.78   | 471.37   | 28.66   | o |
| 3425 | 1 | -9  | 15 | 6 | 4.68     | 6.37     | 3.18    | < |
| 3426 | 1 | -8  | 15 | 6 | 295.65   | 245.24   | 22.29   | o |
| 3427 | 1 | -7  | 15 | 6 | 0.54     | 6.37     | 3.18    | < |
| 3428 | 1 | -6  | 15 | 6 | 203.22   | 143.32   | 9.55    | o |
| 3429 | 1 | -5  | 15 | 6 | 143.62   | 152.88   | 9.55    | o |
| 3430 | 1 | -4  | 15 | 6 | 16.90    | 35.03    | 6.37    | o |
| 3431 | 1 | -2  | 15 | 6 | 1165.12  | 1079.69  | 35.03   | o |
| 3432 | 1 | -1  | 15 | 6 | 1608.19  | 1856.81  | 60.51   | o |
| 3433 | 1 | 0   | 15 | 6 | 111.49   | 133.77   | 9.55    | o |
| 3434 | 1 | 1   | 15 | 6 | 1473.14  | 1869.55  | 70.07   | o |
| 3435 | 1 | 3   | 15 | 6 | 1331.11  | 1286.71  | 60.51   | o |
| 3436 | 1 | 4   | 15 | 6 | 93.87    | 85.99    | 6.37    | o |
| 3437 | 1 | 5   | 15 | 6 | 296.46   | 254.79   | 12.74   | o |
| 3438 | 1 | 6   | 15 | 6 | 0.49     | 6.37     | 3.18    | < |
| 3439 | 1 | 7   | 15 | 6 | 51.17    | 50.96    | 6.37    | o |
| 3440 | 1 | 8   | 15 | 6 | 186.27   | 156.06   | 12.74   | o |
| 3441 | 1 | 9   | 15 | 6 | 22.30    | 25.48    | 3.18    | o |
| 3442 | 1 | 10  | 15 | 6 | 313.58   | 280.27   | 57.33   | o |
| 3443 | 1 | 11  | 15 | 6 | 480.34   | 445.89   | 168.80  | < |
| 3444 | 1 | 12  | 15 | 6 | 64.46    | 85.99    | 124.21  | < |
| 3445 | 1 | -11 | 16 | 6 | 67.64    | 89.18    | 22.29   | o |
| 3446 | 1 | -10 | 16 | 6 | 795.34   | 678.39   | 152.88  | o |
| 3447 | 1 | -9  | 16 | 6 | 4141.04  | 4392.01  | 152.88  | o |
| 3448 | 1 | -8  | 16 | 6 | 107.72   | 130.58   | 6.37    | o |
| 3449 | 1 | -7  | 16 | 6 | 1554.02  | 1395.00  | 353.53  | o |
| 3450 | 1 | -6  | 16 | 6 | 266.51   | 222.95   | 12.74   | o |
| 3451 | 1 | -5  | 16 | 6 | 117.74   | 95.55    | 6.37    | o |
| 3452 | 1 | -3  | 16 | 6 | 4672.60  | 5605.47  | 171.99  | o |
| 3453 | 1 | -2  | 16 | 6 | 4965.11  | 5484.44  | 194.28  | o |
| 3454 | 1 | -1  | 16 | 6 | 1137.95  | 1372.70  | 57.33   | o |
| 3455 | 1 | 0   | 16 | 6 | 43308.10 | 54051.40 | 1882.29 | o |

|      |   |     |    |   |          |          |         |   |
|------|---|-----|----|---|----------|----------|---------|---|
| 3456 | 1 | 1   | 16 | 6 | 1054.83  | 1410.92  | 54.14   | o |
| 3457 | 1 | 2   | 16 | 6 | 4561.76  | 5522.66  | 171.99  | o |
| 3458 | 1 | 3   | 16 | 6 | 5339.81  | 6025.88  | 184.73  | o |
| 3459 | 1 | 4   | 16 | 6 | 178.53   | 232.50   | 9.55    | o |
| 3460 | 1 | 5   | 16 | 6 | 145.95   | 133.77   | 9.55    | o |
| 3461 | 1 | 6   | 16 | 6 | 469.63   | 366.27   | 15.92   | o |
| 3462 | 1 | 7   | 16 | 6 | 2459.72  | 2554.31  | 79.62   | o |
| 3463 | 1 | 8   | 16 | 6 | 6.50     | 41.40    | 44.59   | < |
| 3464 | 1 | 9   | 16 | 6 | 3928.50  | 4761.47  | 1401.37 | o |
| 3465 | 1 | 10  | 16 | 6 | 1082.66  | 840.82   | 54.14   | o |
| 3466 | 1 | 11  | 16 | 6 | 198.87   | 229.32   | 15.92   | o |
| 3467 | 1 | 12  | 16 | 6 | 1397.02  | 1000.07  | 442.70  | < |
| 3468 | 1 | -11 | 17 | 6 | 4.38     | 12.74    | 19.11   | < |
| 3469 | 1 | -10 | 17 | 6 | 368.30   | 391.75   | 25.48   | o |
| 3470 | 1 | -9  | 17 | 6 | 0.78     | 6.37     | 3.18    | < |
| 3471 | 1 | -8  | 17 | 6 | 281.27   | 257.98   | 19.11   | o |
| 3472 | 1 | -7  | 17 | 6 | 59.04    | 73.25    | 6.37    | o |
| 3473 | 1 | -6  | 17 | 6 | 50.06    | 41.40    | 3.18    | o |
| 3474 | 1 | -5  | 17 | 6 | 256.98   | 242.05   | 12.74   | o |
| 3475 | 1 | -4  | 17 | 6 | 786.70   | 719.79   | 31.85   | o |
| 3476 | 1 | -3  | 17 | 6 | 240.67   | 248.42   | 12.74   | o |
| 3477 | 1 | -2  | 17 | 6 | 47.81    | 60.51    | 6.37    | o |
| 3478 | 1 | 1   | 17 | 6 | 140.67   | 121.03   | 6.37    | o |
| 3479 | 1 | 2   | 17 | 6 | 25.30    | 47.77    | 6.37    | o |
| 3480 | 1 | 3   | 17 | 6 | 321.11   | 302.57   | 19.11   | o |
| 3481 | 1 | 5   | 17 | 6 | 320.74   | 299.38   | 15.92   | o |
| 3482 | 1 | 6   | 17 | 6 | 30.30    | 35.03    | 6.37    | o |
| 3483 | 1 | 7   | 17 | 6 | 39.78    | 38.22    | 6.37    | o |
| 3484 | 1 | 8   | 17 | 6 | 431.28   | 366.27   | 22.29   | o |
| 3485 | 1 | 9   | 17 | 6 | 28.47    | 28.66    | 3.18    | o |
| 3486 | 1 | 10  | 17 | 6 | 239.89   | 213.39   | 31.85   | o |
| 3487 | 1 | 11  | 17 | 6 | 72.80    | 70.07    | 12.74   | o |
| 3488 | 1 | -11 | 18 | 6 | 39.05    | 41.40    | 6.37    | o |
| 3489 | 1 | -10 | 18 | 6 | 4789.13  | 5054.48  | 363.08  | o |
| 3490 | 1 | -9  | 18 | 6 | 533.89   | 471.37   | 66.88   | o |
| 3491 | 1 | -8  | 18 | 6 | 2064.64  | 1933.25  | 95.55   | o |
| 3492 | 1 | -7  | 18 | 6 | 116.26   | 95.55    | 6.37    | o |
| 3493 | 1 | -6  | 18 | 6 | 16.59    | 28.66    | 3.18    | o |
| 3494 | 1 | -5  | 18 | 6 | 344.00   | 379.01   | 19.11   | o |
| 3495 | 1 | -4  | 18 | 6 | 11626.10 | 14415.00 | 436.33  | o |
| 3496 | 1 | -3  | 18 | 6 | 1750.94  | 1939.62  | 73.25   | o |
| 3497 | 1 | -2  | 18 | 6 | 6620.39  | 7841.29  | 277.09  | o |
| 3498 | 1 | 0   | 18 | 6 | 64.17    | 60.51    | 6.37    | o |
| 3499 | 1 | 1   | 18 | 6 | 66.74    | 101.92   | 6.37    | o |
| 3500 | 1 | 2   | 18 | 6 | 6379.29  | 7777.59  | 238.87  | o |
| 3501 | 1 | 3   | 18 | 6 | 1409.50  | 1831.33  | 70.07   | o |
| 3502 | 1 | 4   | 18 | 6 | 13072.00 | 15908.70 | 484.11  | o |
| 3503 | 1 | 5   | 18 | 6 | 210.38   | 283.46   | 12.74   | o |
| 3504 | 1 | 6   | 18 | 6 | 53.35    | 41.40    | 6.37    | o |
| 3505 | 1 | 8   | 18 | 6 | 4048.19  | 4038.49  | 124.21  | o |
| 3506 | 1 | 9   | 18 | 6 | 189.55   | 175.17   | 82.81   | < |
| 3507 | 1 | 10  | 18 | 6 | 3557.88  | 3098.93  | 140.14  | o |
| 3508 | 1 | -11 | 19 | 6 | 3.90     | 9.55     | 6.37    | < |
| 3509 | 1 | -10 | 19 | 6 | 5.59     | 9.55     | 12.74   | < |
| 3510 | 1 | -9  | 19 | 6 | 403.72   | 347.16   | 66.88   | o |
| 3511 | 1 | -8  | 19 | 6 | 619.80   | 605.14   | 92.36   | o |
| 3512 | 1 | -7  | 19 | 6 | 1.22     | 3.18     | 3.18    | < |
| 3513 | 1 | -6  | 19 | 6 | 348.49   | 283.46   | 12.74   | o |

|      |   |     |    |   |          |          |        |   |
|------|---|-----|----|---|----------|----------|--------|---|
| 3514 | 1 | -5  | 19 | 6 | 279.13   | 264.35   | 19.11  | o |
| 3515 | 1 | -4  | 19 | 6 | 14.57    | 54.14    | 200.65 | < |
| 3516 | 1 | -3  | 19 | 6 | 100.94   | 82.81    | 6.37   | o |
| 3517 | 1 | 0   | 19 | 6 | 254.88   | 289.83   | 12.74  | o |
| 3518 | 1 | 1   | 19 | 6 | 162.94   | 152.88   | 9.55   | o |
| 3519 | 1 | 2   | 19 | 6 | 391.08   | 363.08   | 15.92  | o |
| 3520 | 1 | 4   | 19 | 6 | 256.24   | 191.10   | 9.55   | o |
| 3521 | 1 | 5   | 19 | 6 | 153.47   | 184.73   | 9.55   | o |
| 3522 | 1 | 6   | 19 | 6 | 112.64   | 136.95   | 9.55   | o |
| 3523 | 1 | 7   | 19 | 6 | 1.18     | 9.55     | 3.18   | o |
| 3524 | 1 | 8   | 19 | 6 | 394.24   | 369.45   | 28.66  | o |
| 3525 | 1 | 9   | 19 | 6 | 1024.53  | 1025.55  | 38.22  | o |
| 3526 | 1 | -10 | 20 | 6 | 3.08     | 28.66    | 6.37   | o |
| 3527 | 1 | -9  | 20 | 6 | 234.52   | 213.39   | 15.92  | o |
| 3528 | 1 | -8  | 20 | 6 | 317.26   | 226.13   | 54.14  | o |
| 3529 | 1 | -7  | 20 | 6 | 177.06   | 140.14   | 12.74  | o |
| 3530 | 1 | -6  | 20 | 6 | 3664.67  | 3318.69  | 121.03 | o |
| 3531 | 1 | -5  | 20 | 6 | 43.31    | 35.03    | 6.37   | o |
| 3532 | 1 | -4  | 20 | 6 | 130.10   | 108.29   | 6.37   | o |
| 3533 | 1 | -3  | 20 | 6 | 1692.62  | 1691.20  | 63.70  | o |
| 3534 | 1 | 0   | 20 | 6 | 4630.81  | 5548.14  | 171.99 | o |
| 3535 | 1 | 2   | 20 | 6 | 225.23   | 200.65   | 9.55   | o |
| 3536 | 1 | 3   | 20 | 6 | 992.70   | 1302.64  | 50.96  | o |
| 3537 | 1 | 5   | 20 | 6 | 44.00    | 41.40    | 6.37   | o |
| 3538 | 1 | 6   | 20 | 6 | 2730.72  | 2904.65  | 92.36  | o |
| 3539 | 1 | 7   | 20 | 6 | 518.65   | 487.29   | 19.11  | o |
| 3540 | 1 | 8   | 20 | 6 | 771.54   | 633.80   | 25.48  | o |
| 3541 | 1 | 9   | 20 | 6 | 92.12    | 63.70    | 12.74  | o |
| 3542 | 1 | -8  | 21 | 6 | 132.00   | 121.03   | 12.74  | o |
| 3543 | 1 | -7  | 21 | 6 | 172.42   | 178.36   | 9.55   | o |
| 3544 | 1 | -6  | 21 | 6 | 3.13     | 6.37     | 3.18   | < |
| 3545 | 1 | -5  | 21 | 6 | 49.51    | 50.96    | 6.37   | o |
| 3546 | 1 | -4  | 21 | 6 | 829.01   | 722.98   | 25.48  | o |
| 3547 | 1 | -3  | 21 | 6 | 43.83    | 66.88    | 6.37   | o |
| 3548 | 1 | -2  | 21 | 6 | 55.44    | 47.77    | 6.37   | o |
| 3549 | 1 | -1  | 21 | 6 | 764.98   | 910.89   | 38.22  | o |
| 3550 | 1 | 0   | 21 | 6 | 0.12     | 28.66    | 38.22  | < |
| 3551 | 1 | 1   | 21 | 6 | 993.83   | 977.77   | 38.22  | o |
| 3552 | 1 | 2   | 21 | 6 | 36.48    | 63.70    | 6.37   | o |
| 3553 | 1 | 3   | 21 | 6 | 93.39    | 92.36    | 6.37   | o |
| 3554 | 1 | 4   | 21 | 6 | 464.05   | 538.25   | 22.29  | o |
| 3555 | 1 | 5   | 21 | 6 | 76.64    | 63.70    | 6.37   | o |
| 3556 | 1 | 6   | 21 | 6 | 3.69     | 6.37     | 3.18   | < |
| 3557 | 1 | 7   | 21 | 6 | 95.09    | 89.18    | 6.37   | o |
| 3558 | 1 | 8   | 21 | 6 | 38.85    | 38.22    | 12.74  | o |
| 3559 | 1 | -7  | 22 | 6 | 700.37   | 547.81   | 85.99  | o |
| 3560 | 1 | -6  | 22 | 6 | 76.34    | 63.70    | 92.36  | < |
| 3561 | 1 | -5  | 22 | 6 | 0.08     | 3.18     | 3.18   | < |
| 3562 | 1 | -4  | 22 | 6 | 4834.31  | 4841.09  | 149.69 | o |
| 3563 | 1 | -3  | 22 | 6 | 2023.49  | 2086.13  | 66.88  | o |
| 3564 | 1 | -2  | 22 | 6 | 10566.10 | 13255.70 | 404.49 | o |
| 3565 | 1 | -1  | 22 | 6 | 128.82   | 143.32   | 12.74  | o |
| 3566 | 1 | 0   | 22 | 6 | 9434.87  | 11074.00 | 340.79 | o |
| 3567 | 1 | 1   | 22 | 6 | 246.07   | 197.46   | 9.55   | o |
| 3568 | 1 | 2   | 22 | 6 | 10861.00 | 13641.00 | 417.23 | o |
| 3569 | 1 | 3   | 22 | 6 | 1433.00  | 1844.07  | 70.07  | o |
| 3570 | 1 | 4   | 22 | 6 | 3704.34  | 4519.41  | 140.14 | o |
| 3571 | 1 | 5   | 22 | 6 | 17.14    | 6.37     | 3.18   | < |

|      |   |     |    |   |         |         |        |   |
|------|---|-----|----|---|---------|---------|--------|---|
| 3572 | 1 | 6   | 22 | 6 | 58.20   | 50.96   | 6.37   | o |
| 3573 | 1 | 7   | 22 | 6 | 991.33  | 770.75  | 38.22  | o |
| 3574 | 1 | 8   | 22 | 6 | 647.67  | 550.99  | 859.93 | < |
| 3575 | 1 | -7  | 23 | 6 | 282.52  | 226.13  | 41.40  | o |
| 3576 | 1 | -6  | 23 | 6 | 127.36  | 152.88  | 9.55   | o |
| 3577 | 1 | -5  | 23 | 6 | 81.33   | 76.44   | 6.37   | o |
| 3578 | 1 | -4  | 23 | 6 | 382.62  | 324.86  | 15.92  | o |
| 3579 | 1 | -3  | 23 | 6 | 123.42  | 203.84  | 12.74  | o |
| 3580 | 1 | -2  | 23 | 6 | 1774.57 | 1649.79 | 54.14  | o |
| 3581 | 1 | -1  | 23 | 6 | 8.19    | 35.03   | 6.37   | o |
| 3582 | 1 | 0   | 23 | 6 | 28.68   | 47.77   | 6.37   | o |
| 3583 | 1 | 1   | 23 | 6 | 66.99   | 73.25   | 6.37   | o |
| 3584 | 1 | 3   | 23 | 6 | 568.21  | 458.63  | 19.11  | o |
| 3585 | 1 | 4   | 23 | 6 | 175.69  | 238.87  | 12.74  | o |
| 3586 | 1 | 5   | 23 | 6 | 29.25   | 28.66   | 6.37   | o |
| 3587 | 1 | 7   | 23 | 6 | 504.22  | 445.89  | 25.48  | o |
| 3588 | 1 | -6  | 24 | 6 | 3922.13 | 3143.52 | 168.80 | o |
| 3589 | 1 | -5  | 24 | 6 | 714.04  | 554.18  | 31.85  | o |
| 3590 | 1 | -4  | 24 | 6 | 566.10  | 493.66  | 28.66  | o |
| 3591 | 1 | -3  | 24 | 6 | 66.02   | 98.73   | 6.37   | o |
| 3592 | 1 | -2  | 24 | 6 | 191.18  | 168.80  | 9.55   | o |
| 3593 | 1 | -1  | 24 | 6 | 1083.42 | 1009.62 | 35.03  | o |
| 3594 | 1 | 0   | 24 | 6 | 662.18  | 621.06  | 25.48  | o |
| 3595 | 1 | 1   | 24 | 6 | 928.01  | 898.15  | 31.85  | o |
| 3596 | 1 | 2   | 24 | 6 | 180.13  | 184.73  | 9.55   | o |
| 3597 | 1 | 3   | 24 | 6 | 190.38  | 184.73  | 9.55   | o |
| 3598 | 1 | 4   | 24 | 6 | 788.04  | 643.35  | 28.66  | o |
| 3599 | 1 | 5   | 24 | 6 | 486.09  | 452.26  | 25.48  | o |
| 3600 | 1 | 6   | 24 | 6 | 6365.33 | 5939.89 | 257.98 | o |
| 3601 | 1 | 7   | 24 | 6 | 970.52  | 879.04  | 47.77  | o |
| 3602 | 1 | -6  | 25 | 6 | 208.40  | 197.46  | 15.92  | o |
| 3603 | 1 | -5  | 25 | 6 | 5.32    | 3.18    | 3.18   | < |
| 3604 | 1 | -4  | 25 | 6 | 30.77   | 41.40   | 6.37   | o |
| 3605 | 1 | -3  | 25 | 6 | 28.44   | 44.59   | 6.37   | o |
| 3606 | 1 | -1  | 25 | 6 | 109.52  | 111.47  | 9.55   | o |
| 3607 | 1 | 0   | 25 | 6 | 0.78    | 6.37    | 3.18   | < |
| 3608 | 1 | 2   | 25 | 6 | 479.33  | 394.93  | 19.11  | o |
| 3609 | 1 | 3   | 25 | 6 | 1.92    | 22.29   | 6.37   | o |
| 3610 | 1 | 4   | 25 | 6 | 70.49   | 50.96   | 6.37   | o |
| 3611 | 1 | 5   | 25 | 6 | 0.23    | 9.55    | 6.37   | < |
| 3612 | 1 | 6   | 25 | 6 | 57.67   | 73.25   | 9.55   | o |
| 3613 | 1 | 7   | 25 | 6 | 474.30  | 414.04  | 35.03  | o |
| 3614 | 1 | -5  | 26 | 6 | 89.67   | 89.18   | 9.55   | o |
| 3615 | 1 | -4  | 26 | 6 | 3321.05 | 2926.95 | 133.77 | o |
| 3616 | 1 | -3  | 26 | 6 | 1065.49 | 971.40  | 47.77  | o |
| 3617 | 1 | -2  | 26 | 6 | 2140.02 | 2407.80 | 108.29 | o |
| 3618 | 1 | -1  | 26 | 6 | 502.23  | 401.30  | 35.03  | o |
| 3619 | 1 | 0   | 26 | 6 | 73.42   | 79.62   | 12.74  | o |
| 3620 | 1 | 1   | 26 | 6 | 243.52  | 210.21  | 38.22  | o |
| 3621 | 1 | 2   | 26 | 6 | 2544.85 | 2165.75 | 140.14 | o |
| 3622 | 1 | 3   | 26 | 6 | 941.47  | 853.56  | 60.51  | o |
| 3623 | 1 | 4   | 26 | 6 | 3237.24 | 3073.45 | 197.46 | o |
| 3624 | 1 | 5   | 26 | 6 | 99.96   | 89.18   | 15.92  | o |
| 3625 | 1 | -5  | 27 | 6 | 293.88  | 229.32  | 25.48  | o |
| 3626 | 1 | -4  | 27 | 6 | 0.79    | 6.37    | 6.37   | < |
| 3627 | 1 | -3  | 27 | 6 | 13.55   | 12.74   | 12.74  | < |
| 3628 | 1 | -11 | 1  | 7 | 928.16  | 812.16  | 63.70  | o |
| 3629 | 1 | -10 | 1  | 7 | 916.84  | 984.14  | 108.29 | o |

|      |   |     |   |   |          |          |        |   |
|------|---|-----|---|---|----------|----------|--------|---|
| 3630 | 1 | -9  | 1 | 7 | 123.10   | 101.92   | 6.37   | o |
| 3631 | 1 | -8  | 1 | 7 | 3537.12  | 3684.96  | 130.58 | o |
| 3632 | 1 | -7  | 1 | 7 | 6182.30  | 7143.79  | 216.57 | o |
| 3633 | 1 | -6  | 1 | 7 | 1463.59  | 1767.63  | 66.88  | o |
| 3634 | 1 | -5  | 1 | 7 | 12985.30 | 13504.10 | 471.37 | o |
| 3635 | 1 | -4  | 1 | 7 | 1762.39  | 1538.32  | 57.33  | o |
| 3636 | 1 | -3  | 1 | 7 | 3965.00  | 3869.69  | 168.80 | o |
| 3637 | 1 | -2  | 1 | 7 | 13628.50 | 13000.90 | 557.36 | o |
| 3638 | 1 | -1  | 1 | 7 | 7834.92  | 8398.65  | 363.08 | o |
| 3639 | 1 | 0   | 1 | 7 | 156.32   | 216.57   | 9.55   | o |
| 3640 | 1 | 1   | 1 | 7 | 6155.56  | 6166.02  | 216.57 | o |
| 3641 | 1 | 2   | 1 | 7 | 10521.70 | 9882.83  | 299.38 | o |
| 3642 | 1 | 3   | 1 | 7 | 2695.81  | 2350.48  | 73.25  | o |
| 3643 | 1 | 4   | 1 | 7 | 3050.94  | 2774.07  | 85.99  | o |
| 3644 | 1 | 5   | 1 | 7 | 16812.60 | 15937.40 | 480.92 | o |
| 3645 | 1 | 6   | 1 | 7 | 1290.21  | 1407.74  | 44.59  | o |
| 3646 | 1 | 7   | 1 | 7 | 6091.48  | 6111.88  | 187.91 | o |
| 3647 | 1 | 8   | 1 | 7 | 3941.37  | 4095.82  | 127.40 | o |
| 3648 | 1 | 9   | 1 | 7 | 110.28   | 85.99    | 6.37   | o |
| 3649 | 1 | 10  | 1 | 7 | 723.67   | 732.53   | 25.48  | o |
| 3650 | 1 | 11  | 1 | 7 | 794.41   | 773.94   | 82.81  | o |
| 3651 | 1 | 12  | 1 | 7 | 85.96    | 79.62    | 6.37   | o |
| 3652 | 1 | -11 | 2 | 7 | 7.23     | 12.74    | 3.18   | o |
| 3653 | 1 | -10 | 2 | 7 | 79.57    | 108.29   | 31.85  | o |
| 3654 | 1 | -9  | 2 | 7 | 777.68   | 840.82   | 28.66  | o |
| 3655 | 1 | -8  | 2 | 7 | 65.83    | 79.62    | 6.37   | o |
| 3656 | 1 | -7  | 2 | 7 | 2.65     | 6.37     | 31.85  | < |
| 3657 | 1 | -6  | 2 | 7 | 997.88   | 1226.20  | 47.77  | o |
| 3658 | 1 | -5  | 2 | 7 | 0.73     | 3.18     | 79.62  | < |
| 3659 | 1 | -4  | 2 | 7 | 0.72     | 9.55     | 3.18   | o |
| 3660 | 1 | -3  | 2 | 7 | 1.12     | 12.74    | 3.18   | o |
| 3661 | 1 | -2  | 2 | 7 | 139.55   | 152.88   | 9.55   | o |
| 3662 | 1 | -1  | 2 | 7 | 169.96   | 133.77   | 6.37   | o |
| 3663 | 1 | 0   | 2 | 7 | 1398.63  | 1347.22  | 44.59  | o |
| 3664 | 1 | 2   | 2 | 7 | 255.95   | 229.32   | 9.55   | o |
| 3665 | 1 | 3   | 2 | 7 | 149.56   | 105.10   | 6.37   | o |
| 3666 | 1 | 4   | 2 | 7 | 155.57   | 159.25   | 6.37   | o |
| 3667 | 1 | 5   | 2 | 7 | 534.55   | 601.95   | 22.29  | o |
| 3668 | 1 | 6   | 2 | 7 | 10.75    | -3.18    | 130.58 | < |
| 3669 | 1 | 7   | 2 | 7 | 34.96    | 28.66    | 3.18   | o |
| 3670 | 1 | 8   | 2 | 7 | 114.31   | 127.40   | 6.37   | o |
| 3671 | 1 | 9   | 2 | 7 | 195.50   | 191.10   | 15.92  | o |
| 3672 | 1 | 10  | 2 | 7 | 390.89   | 407.67   | 15.92  | o |
| 3673 | 1 | 11  | 2 | 7 | 30.49    | 25.48    | 3.18   | o |
| 3674 | 1 | 12  | 2 | 7 | 171.68   | 181.54   | 9.55   | o |
| 3675 | 1 | -11 | 3 | 7 | 198.90   | 267.53   | 19.11  | o |
| 3676 | 1 | -10 | 3 | 7 | 21.89    | 38.22    | 6.37   | o |
| 3677 | 1 | -9  | 3 | 7 | 2059.85  | 1914.14  | 127.40 | o |
| 3678 | 1 | -8  | 3 | 7 | 7441.19  | 7952.76  | 257.98 | o |
| 3679 | 1 | -7  | 3 | 7 | 742.47   | 818.53   | 31.85  | o |
| 3680 | 1 | -6  | 3 | 7 | 797.14   | 961.85   | 31.85  | o |
| 3681 | 1 | -5  | 3 | 7 | 1775.89  | 1945.99  | 60.51  | o |
| 3682 | 1 | -4  | 3 | 7 | 7324.75  | 7720.26  | 235.68 | o |
| 3683 | 1 | -3  | 3 | 7 | 48.50    | 66.88    | 6.37   | o |
| 3684 | 1 | -2  | 3 | 7 | 7118.34  | 7672.49  | 270.72 | o |
| 3685 | 1 | -1  | 3 | 7 | 4737.52  | 4927.08  | 175.17 | o |
| 3686 | 1 | 1   | 3 | 7 | 3128.13  | 3525.71  | 108.29 | o |
| 3687 | 1 | 2   | 3 | 7 | 9105.47  | 9370.06  | 286.64 | o |

|      |   |     |   |   |          |          |        |   |
|------|---|-----|---|---|----------|----------|--------|---|
| 3688 | 1 | 3   | 3 | 7 | 708.92   | 624.25   | 22.29  | o |
| 3689 | 1 | 4   | 3 | 7 | 12808.00 | 11908.40 | 359.90 | o |
| 3690 | 1 | 5   | 3 | 7 | 656.01   | 544.62   | 63.70  | o |
| 3691 | 1 | 6   | 3 | 7 | 107.40   | 79.62    | 19.11  | o |
| 3692 | 1 | 7   | 3 | 7 | 503.33   | 621.06   | 35.03  | o |
| 3693 | 1 | 8   | 3 | 7 | 6375.82  | 6583.24  | 203.84 | o |
| 3694 | 1 | 9   | 3 | 7 | 1934.62  | 2114.79  | 79.62  | o |
| 3695 | 1 | 10  | 3 | 7 | 8.16     | 25.48    | 3.18   | o |
| 3696 | 1 | 11  | 3 | 7 | 98.88    | 156.06   | 15.92  | o |
| 3697 | 1 | 12  | 3 | 7 | 1024.02  | 936.37   | 95.55  | o |
| 3698 | 1 | -12 | 4 | 7 | 1.67     | 6.37     | 3.18   | < |
| 3699 | 1 | -11 | 4 | 7 | 419.42   | 449.08   | 31.85  | o |
| 3700 | 1 | -10 | 4 | 7 | 0.11     | -3.18    | 15.92  | < |
| 3701 | 1 | -9  | 4 | 7 | 3.76     | 9.55     | 3.18   | o |
| 3702 | 1 | -8  | 4 | 7 | 383.90   | 375.82   | 15.92  | o |
| 3703 | 1 | -7  | 4 | 7 | 75.05    | 82.81    | 6.37   | o |
| 3704 | 1 | -6  | 4 | 7 | 4.49     | 3.18     | 3.18   | < |
| 3705 | 1 | -5  | 4 | 7 | 59.43    | 50.96    | 3.18   | o |
| 3706 | 1 | -4  | 4 | 7 | 38.98    | 47.77    | 3.18   | o |
| 3707 | 1 | -3  | 4 | 7 | 318.24   | 264.35   | 12.74  | o |
| 3708 | 1 | -2  | 4 | 7 | 0.49     | 9.55     | 3.18   | o |
| 3709 | 1 | -1  | 4 | 7 | 18.18    | 19.11    | 3.18   | o |
| 3710 | 1 | 0   | 4 | 7 | 189.21   | 219.76   | 9.55   | o |
| 3711 | 1 | 1   | 4 | 7 | 40.41    | 47.77    | 3.18   | o |
| 3712 | 1 | 2   | 4 | 7 | 93.38    | 79.62    | 6.37   | o |
| 3713 | 1 | 3   | 4 | 7 | 220.24   | 194.28   | 9.55   | o |
| 3714 | 1 | 4   | 4 | 7 | 55.29    | 54.14    | 3.18   | o |
| 3715 | 1 | 5   | 4 | 7 | 54.94    | 50.96    | 6.37   | o |
| 3716 | 1 | 6   | 4 | 7 | 20.11    | 22.29    | 6.37   | o |
| 3717 | 1 | 7   | 4 | 7 | 49.86    | 57.33    | 6.37   | o |
| 3718 | 1 | 8   | 4 | 7 | 52.49    | 44.59    | 44.59  | < |
| 3719 | 1 | 9   | 4 | 7 | 0.06     | 3.18     | 12.74  | < |
| 3720 | 1 | 10  | 4 | 7 | 101.22   | 98.73    | 6.37   | o |
| 3721 | 1 | 11  | 4 | 7 | 345.91   | 347.16   | 22.29  | o |
| 3722 | 1 | 12  | 4 | 7 | 1.51     | 3.18     | 3.18   | < |
| 3723 | 1 | -12 | 5 | 7 | 396.12   | 407.67   | 31.85  | o |
| 3724 | 1 | -11 | 5 | 7 | 2415.00  | 2541.57  | 130.58 | o |
| 3725 | 1 | -10 | 5 | 7 | 8.74     | 6.37     | 6.37   | < |
| 3726 | 1 | -9  | 5 | 7 | 1117.94  | 920.44   | 35.03  | o |
| 3727 | 1 | -8  | 5 | 7 | 1655.96  | 1659.35  | 60.51  | o |
| 3728 | 1 | -7  | 5 | 7 | 977.60   | 914.07   | 38.22  | o |
| 3729 | 1 | -6  | 5 | 7 | 20.83    | 44.59    | 6.37   | o |
| 3730 | 1 | -5  | 5 | 7 | 1923.54  | 1815.41  | 98.73  | o |
| 3731 | 1 | -4  | 5 | 7 | 9784.13  | 10914.70 | 382.19 | o |
| 3732 | 1 | -3  | 5 | 7 | 1473.03  | 1366.33  | 50.96  | o |
| 3733 | 1 | -2  | 5 | 7 | 297.46   | 324.86   | 12.74  | o |
| 3734 | 1 | -1  | 5 | 7 | 13918.70 | 14278.00 | 433.15 | o |
| 3735 | 1 | 1   | 5 | 7 | 11635.20 | 12529.50 | 382.19 | o |
| 3736 | 1 | 2   | 5 | 7 | 115.27   | 124.21   | 6.37   | o |
| 3737 | 1 | 3   | 5 | 7 | 1098.41  | 949.11   | 31.85  | o |
| 3738 | 1 | 4   | 5 | 7 | 10794.20 | 10239.50 | 312.12 | o |
| 3739 | 1 | 5   | 5 | 7 | 1987.93  | 1898.22  | 60.51  | o |
| 3740 | 1 | 6   | 5 | 7 | 130.64   | 146.51   | 6.37   | o |
| 3741 | 1 | 7   | 5 | 7 | 1170.40  | 1108.35  | 54.14  | o |
| 3742 | 1 | 8   | 5 | 7 | 787.56   | 824.90   | 31.85  | o |
| 3743 | 1 | 9   | 5 | 7 | 842.31   | 758.01   | 63.70  | o |
| 3744 | 1 | 10  | 5 | 7 | 34.55    | 44.59    | 3.18   | o |
| 3745 | 1 | 11  | 5 | 7 | 2629.53  | 3111.67  | 114.66 | o |

|      |   |     |   |   |          |          |        |   |
|------|---|-----|---|---|----------|----------|--------|---|
| 3746 | 1 | 12  | 5 | 7 | 417.54   | 404.49   | 19.11  | o |
| 3747 | 1 | -12 | 6 | 7 | 28.24    | 31.85    | 6.37   | o |
| 3748 | 1 | -11 | 6 | 7 | 48.02    | 57.33    | 6.37   | o |
| 3749 | 1 | -10 | 6 | 7 | 36.35    | 44.59    | 6.37   | o |
| 3750 | 1 | -9  | 6 | 7 | 262.19   | 264.35   | 9.55   | o |
| 3751 | 1 | -8  | 6 | 7 | 0.24     | -3.18    | 6.37   | < |
| 3752 | 1 | -7  | 6 | 7 | 16.49    | 15.92    | 3.18   | o |
| 3753 | 1 | -6  | 6 | 7 | 67.78    | 70.07    | 6.37   | o |
| 3754 | 1 | -5  | 6 | 7 | 107.23   | 105.10   | 6.37   | o |
| 3755 | 1 | -4  | 6 | 7 | 41.98    | 47.77    | 6.37   | o |
| 3756 | 1 | -3  | 6 | 7 | 0.56     | 6.37     | 3.18   | < |
| 3757 | 1 | -2  | 6 | 7 | 350.39   | 312.12   | 12.74  | o |
| 3758 | 1 | -1  | 6 | 7 | 234.32   | 264.35   | 9.55   | o |
| 3759 | 1 | 0   | 6 | 7 | 19.65    | 15.92    | 3.18   | o |
| 3760 | 1 | 1   | 6 | 7 | 532.09   | 471.37   | 15.92  | o |
| 3761 | 1 | 2   | 6 | 7 | 100.85   | 89.18    | 6.37   | o |
| 3762 | 1 | 3   | 6 | 7 | 116.72   | 89.18    | 6.37   | o |
| 3763 | 1 | 4   | 6 | 7 | 355.85   | 353.53   | 12.74  | o |
| 3764 | 1 | 5   | 6 | 7 | 62.82    | 41.40    | 3.18   | o |
| 3765 | 1 | 6   | 6 | 7 | 0.51     | 3.18     | 9.55   | < |
| 3766 | 1 | 7   | 6 | 7 | 1.66     | 3.18     | 3.18   | < |
| 3767 | 1 | 8   | 6 | 7 | 85.78    | 85.99    | 9.55   | o |
| 3768 | 1 | 9   | 6 | 7 | 15.88    | 9.55     | 19.11  | < |
| 3769 | 1 | 10  | 6 | 7 | 24.01    | 28.66    | 3.18   | o |
| 3770 | 1 | 11  | 6 | 7 | 1.58     | 3.18     | 3.18   | < |
| 3771 | 1 | 12  | 6 | 7 | 14.23    | 19.11    | 3.18   | o |
| 3772 | 1 | -12 | 7 | 7 | 701.48   | 656.09   | 38.22  | o |
| 3773 | 1 | -11 | 7 | 7 | 2915.65  | 2939.69  | 159.25 | o |
| 3774 | 1 | -10 | 7 | 7 | 518.43   | 458.63   | 44.59  | o |
| 3775 | 1 | -9  | 7 | 7 | 3.42     | 6.37     | 3.18   | < |
| 3776 | 1 | -8  | 7 | 7 | 791.14   | 649.72   | 31.85  | o |
| 3777 | 1 | -6  | 7 | 7 | 1496.16  | 1235.75  | 85.99  | o |
| 3778 | 1 | -5  | 7 | 7 | 5170.36  | 5064.03  | 178.36 | o |
| 3779 | 1 | -4  | 7 | 7 | 12405.80 | 13160.10 | 398.12 | o |
| 3780 | 1 | -3  | 7 | 7 | 3153.35  | 3242.26  | 101.92 | o |
| 3781 | 1 | -2  | 7 | 7 | 8907.32  | 10000.70 | 302.57 | o |
| 3782 | 1 | -1  | 7 | 7 | 1600.83  | 2035.17  | 63.70  | o |
| 3783 | 1 | 0   | 7 | 7 | 370.14   | 452.26   | 19.11  | o |
| 3784 | 1 | 1   | 7 | 7 | 3338.29  | 3035.24  | 95.55  | o |
| 3785 | 1 | 3   | 7 | 7 | 1373.31  | 1302.64  | 44.59  | o |
| 3786 | 1 | 4   | 7 | 7 | 9946.36  | 10386.00 | 315.31 | o |
| 3787 | 1 | 5   | 7 | 7 | 4130.24  | 3891.98  | 121.03 | o |
| 3788 | 1 | 6   | 7 | 7 | 2418.07  | 2414.17  | 76.44  | o |
| 3789 | 1 | 7   | 7 | 7 | 91.01    | 92.36    | 6.37   | o |
| 3790 | 1 | 8   | 7 | 7 | 905.08   | 936.37   | 38.22  | o |
| 3791 | 1 | 10  | 7 | 7 | 633.39   | 538.25   | 22.29  | o |
| 3792 | 1 | 11  | 7 | 7 | 3167.23  | 3551.19  | 146.51 | o |
| 3793 | 1 | 12  | 7 | 7 | 795.02   | 758.01   | 70.07  | o |
| 3794 | 1 | -12 | 8 | 7 | 93.06    | 140.14   | 15.92  | o |
| 3795 | 1 | -11 | 8 | 7 | 314.66   | 359.90   | 22.29  | o |
| 3796 | 1 | -10 | 8 | 7 | 10.98    | 15.92    | 50.96  | < |
| 3797 | 1 | -9  | 8 | 7 | 3.02     | 3.18     | 3.18   | < |
| 3798 | 1 | -8  | 8 | 7 | 14.66    | 9.55     | 28.66  | < |
| 3799 | 1 | -7  | 8 | 7 | 106.38   | 111.47   | 6.37   | o |
| 3800 | 1 | -6  | 8 | 7 | 358.59   | 331.23   | 12.74  | o |
| 3801 | 1 | -5  | 8 | 7 | 1.54     | 0.00     | 3.18   | < |
| 3802 | 1 | -4  | 8 | 7 | 378.78   | 372.64   | 15.92  | o |
| 3803 | 1 | -3  | 8 | 7 | 117.32   | 89.18    | 6.37   | o |



|      |   |     |    |   |          |          |        |   |
|------|---|-----|----|---|----------|----------|--------|---|
| 3804 | 1 | -2  | 8  | 7 | 984.17   | 984.14   | 31.85  | o |
| 3805 | 1 | 0   | 8  | 7 | 357.86   | 359.90   | 12.74  | o |
| 3806 | 1 | 1   | 8  | 7 | 1216.26  | 1121.09  | 38.22  | o |
| 3807 | 1 | 2   | 8  | 7 | 403.25   | 442.70   | 19.11  | o |
| 3808 | 1 | 3   | 8  | 7 | 11.15    | 12.74    | 3.18   | o |
| 3809 | 1 | 4   | 8  | 7 | 9.59     | 12.74    | 9.55   | < |
| 3810 | 1 | 5   | 8  | 7 | 57.89    | 50.96    | 3.18   | o |
| 3811 | 1 | 6   | 8  | 7 | 156.27   | 127.40   | 25.48  | o |
| 3812 | 1 | 7   | 8  | 7 | 36.51    | 60.51    | 6.37   | o |
| 3813 | 1 | 8   | 8  | 7 | 239.13   | 251.61   | 12.74  | o |
| 3814 | 1 | 9   | 8  | 7 | 10.89    | 6.37     | 3.18   | < |
| 3815 | 1 | 10  | 8  | 7 | 96.86    | 105.10   | 6.37   | o |
| 3816 | 1 | 11  | 8  | 7 | 91.28    | 79.62    | 22.29  | o |
| 3817 | 1 | 12  | 8  | 7 | 167.32   | 162.43   | 12.74  | o |
| 3818 | 1 | -11 | 9  | 7 | 477.29   | 509.59   | 38.22  | o |
| 3819 | 1 | -10 | 9  | 7 | 279.32   | 302.57   | 105.10 | < |
| 3820 | 1 | -9  | 9  | 7 | 681.25   | 646.54   | 273.90 | < |
| 3821 | 1 | -8  | 9  | 7 | 72.41    | 89.18    | 6.37   | o |
| 3822 | 1 | -7  | 9  | 7 | 45.66    | 73.25    | 6.37   | o |
| 3823 | 1 | -6  | 9  | 7 | 387.06   | 299.38   | 15.92  | o |
| 3824 | 1 | -4  | 9  | 7 | 5145.76  | 5745.61  | 175.17 | o |
| 3825 | 1 | -3  | 9  | 7 | 95.49    | 143.32   | 9.55   | o |
| 3826 | 1 | -2  | 9  | 7 | 11455.90 | 13730.20 | 414.04 | o |
| 3827 | 1 | -1  | 9  | 7 | 1223.84  | 1242.12  | 41.40  | o |
| 3828 | 1 | 0   | 9  | 7 | 3.38     | 12.74    | 3.18   | o |
| 3829 | 1 | 1   | 9  | 7 | 840.18   | 1079.69  | 35.03  | o |
| 3830 | 1 | 2   | 9  | 7 | 11743.90 | 13153.70 | 426.78 | o |
| 3831 | 1 | 3   | 9  | 7 | 456.48   | 417.23   | 15.92  | o |
| 3832 | 1 | 4   | 9  | 7 | 6134.43  | 6363.48  | 194.28 | o |
| 3833 | 1 | 6   | 9  | 7 | 37.94    | 31.85    | 9.55   | o |
| 3834 | 1 | 8   | 9  | 7 | 55.92    | 38.22    | 6.37   | o |
| 3835 | 1 | 9   | 9  | 7 | 694.25   | 621.06   | 31.85  | o |
| 3836 | 1 | 10  | 9  | 7 | 393.55   | 286.64   | 47.77  | o |
| 3837 | 1 | 11  | 9  | 7 | 456.95   | 385.38   | 50.96  | o |
| 3838 | 1 | 12  | 9  | 7 | 478.80   | 442.70   | 85.99  | o |
| 3839 | 1 | -11 | 10 | 7 | 173.29   | 184.73   | 15.92  | o |
| 3840 | 1 | -10 | 10 | 7 | 45.53    | 25.48    | 6.37   | o |
| 3841 | 1 | -9  | 10 | 7 | 155.15   | 133.77   | 19.11  | o |
| 3842 | 1 | -8  | 10 | 7 | 65.64    | 57.33    | 6.37   | o |
| 3843 | 1 | -7  | 10 | 7 | 234.18   | 200.65   | 9.55   | o |
| 3844 | 1 | -6  | 10 | 7 | 189.48   | 149.69   | 6.37   | o |
| 3845 | 1 | -5  | 10 | 7 | 267.73   | 257.98   | 12.74  | o |
| 3846 | 1 | -4  | 10 | 7 | 1178.22  | 1229.38  | 41.40  | o |
| 3847 | 1 | -3  | 10 | 7 | 179.36   | 168.80   | 9.55   | o |
| 3848 | 1 | -2  | 10 | 7 | 23.62    | 57.33    | 6.37   | o |
| 3849 | 1 | -1  | 10 | 7 | 47.37    | 41.40    | 3.18   | o |
| 3850 | 1 | 0   | 10 | 7 | 3.09     | 3.18     | 3.18   | < |
| 3851 | 1 | 2   | 10 | 7 | 136.26   | 149.69   | 9.55   | o |
| 3852 | 1 | 3   | 10 | 7 | 175.20   | 213.39   | 9.55   | o |
| 3853 | 1 | 4   | 10 | 7 | 576.30   | 605.14   | 22.29  | o |
| 3854 | 1 | 5   | 10 | 7 | 345.57   | 343.97   | 15.92  | o |
| 3855 | 1 | 6   | 10 | 7 | 167.37   | 127.40   | 22.29  | o |
| 3856 | 1 | 7   | 10 | 7 | 75.27    | 57.33    | 117.84 | < |
| 3857 | 1 | 8   | 10 | 7 | 39.39    | 44.59    | 6.37   | o |
| 3858 | 1 | 9   | 10 | 7 | 220.04   | 219.76   | 12.74  | o |
| 3859 | 1 | 10  | 10 | 7 | 121.29   | 111.47   | 6.37   | o |
| 3860 | 1 | 11  | 10 | 7 | 114.02   | 98.73    | 28.66  | o |
| 3861 | 1 | 12  | 10 | 7 | 5.54     | 9.55     | 9.55   | < |

|      |   |     |    |   |          |          |        |   |
|------|---|-----|----|---|----------|----------|--------|---|
| 3862 | 1 | -11 | 11 | 7 | 1130.67  | 1375.89  | 70.07  | o |
| 3863 | 1 | -10 | 11 | 7 | 904.62   | 996.88   | 50.96  | o |
| 3864 | 1 | -9  | 11 | 7 | 138.89   | 130.58   | 9.55   | o |
| 3865 | 1 | -8  | 11 | 7 | 661.26   | 550.99   | 22.29  | o |
| 3866 | 1 | -7  | 11 | 7 | 927.76   | 732.53   | 31.85  | o |
| 3867 | 1 | -6  | 11 | 7 | 254.56   | 379.01   | 19.11  | o |
| 3868 | 1 | -5  | 11 | 7 | 8756.28  | 8519.68  | 261.16 | o |
| 3869 | 1 | -3  | 11 | 7 | 48.25    | 79.62    | 6.37   | o |
| 3870 | 1 | -2  | 11 | 7 | 10127.60 | 13504.10 | 407.67 | o |
| 3871 | 1 | 1   | 11 | 7 | 6599.24  | 7105.57  | 216.57 | o |
| 3872 | 1 | 2   | 11 | 7 | 15666.50 | 16173.10 | 490.48 | o |
| 3873 | 1 | 3   | 11 | 7 | 348.30   | 308.94   | 12.74  | o |
| 3874 | 1 | 5   | 11 | 7 | 8497.55  | 8688.48  | 264.35 | o |
| 3875 | 1 | 7   | 11 | 7 | 1221.73  | 1254.86  | 79.62  | o |
| 3876 | 1 | 8   | 11 | 7 | 458.81   | 398.12   | 73.25  | o |
| 3877 | 1 | 9   | 11 | 7 | 56.47    | 57.33    | 44.59  | < |
| 3878 | 1 | 10  | 11 | 7 | 559.27   | 420.41   | 73.25  | o |
| 3879 | 1 | 11  | 11 | 7 | 1347.31  | 1028.73  | 79.62  | o |
| 3880 | 1 | 12  | 11 | 7 | 4.96     | 12.74    | 6.37   | < |
| 3881 | 1 | -11 | 12 | 7 | 296.86   | 353.53   | 22.29  | o |
| 3882 | 1 | -10 | 12 | 7 | 115.38   | 108.29   | 9.55   | o |
| 3883 | 1 | -9  | 12 | 7 | 13.65    | 12.74    | 3.18   | o |
| 3884 | 1 | -8  | 12 | 7 | 33.13    | 28.66    | 6.37   | o |
| 3885 | 1 | -7  | 12 | 7 | 109.29   | 108.29   | 9.55   | o |
| 3886 | 1 | -6  | 12 | 7 | 475.46   | 359.90   | 15.92  | o |
| 3887 | 1 | -5  | 12 | 7 | 2.57     | 19.11    | 3.18   | o |
| 3888 | 1 | -4  | 12 | 7 | 528.44   | 433.15   | 19.11  | o |
| 3889 | 1 | -3  | 12 | 7 | 41.34    | 38.22    | 3.18   | o |
| 3890 | 1 | -2  | 12 | 7 | 116.01   | 111.47   | 6.37   | o |
| 3891 | 1 | -1  | 12 | 7 | 204.96   | 270.72   | 12.74  | o |
| 3892 | 1 | 0   | 12 | 7 | 820.22   | 965.03   | 31.85  | o |
| 3893 | 1 | 1   | 12 | 7 | 398.14   | 353.53   | 15.92  | o |
| 3894 | 1 | 3   | 12 | 7 | 5.51     | 19.11    | 3.18   | o |
| 3895 | 1 | 4   | 12 | 7 | 120.29   | 130.58   | 9.55   | o |
| 3896 | 1 | 5   | 12 | 7 | 70.65    | 98.73    | 6.37   | o |
| 3897 | 1 | 6   | 12 | 7 | 1466.26  | 1566.98  | 50.96  | o |
| 3898 | 1 | 7   | 12 | 7 | 3.66     | 9.55     | 12.74  | < |
| 3899 | 1 | 8   | 12 | 7 | 116.52   | 105.10   | 6.37   | o |
| 3900 | 1 | 9   | 12 | 7 | 52.18    | 50.96    | 6.37   | o |
| 3901 | 1 | 10  | 12 | 7 | 19.47    | 28.66    | 19.11  | < |
| 3902 | 1 | 11  | 12 | 7 | 15.39    | 9.55     | 19.11  | < |
| 3903 | 1 | 12  | 12 | 7 | 4.76     | 9.55     | 12.74  | < |
| 3904 | 1 | -11 | 13 | 7 | 5.44     | 12.74    | 6.37   | < |
| 3905 | 1 | -10 | 13 | 7 | 113.03   | 108.29   | 12.74  | o |
| 3906 | 1 | -9  | 13 | 7 | 28.16    | 25.48    | 3.18   | o |
| 3907 | 1 | -8  | 13 | 7 | 5510.79  | 5226.47  | 283.46 | o |
| 3908 | 1 | -7  | 13 | 7 | 2394.66  | 2140.27  | 105.10 | o |
| 3909 | 1 | -6  | 13 | 7 | 1178.08  | 961.85   | 35.03  | o |
| 3910 | 1 | -5  | 13 | 7 | 2561.92  | 2487.43  | 92.36  | o |
| 3911 | 1 | -4  | 13 | 7 | 109.65   | 152.88   | 9.55   | o |
| 3912 | 1 | -3  | 13 | 7 | 4151.22  | 4688.21  | 143.32 | o |
| 3913 | 1 | -2  | 13 | 7 | 10782.90 | 10695.00 | 324.86 | o |
| 3914 | 1 | -1  | 13 | 7 | 688.78   | 834.45   | 35.03  | o |
| 3915 | 1 | 0   | 13 | 7 | 67.83    | 76.44    | 6.37   | o |
| 3916 | 1 | 3   | 13 | 7 | 3172.82  | 4009.82  | 124.21 | o |
| 3917 | 1 | 4   | 13 | 7 | 20.84    | 47.77    | 6.37   | o |
| 3918 | 1 | 5   | 13 | 7 | 3663.33  | 3656.30  | 121.03 | o |
| 3919 | 1 | 6   | 13 | 7 | 1348.53  | 1232.57  | 47.77  | o |

|      |   |     |    |   |         |         |        |   |
|------|---|-----|----|---|---------|---------|--------|---|
| 3920 | 1 | 7   | 13 | 7 | 1950.95 | 1974.65 | 95.55  | o |
| 3921 | 1 | 8   | 13 | 7 | 5423.36 | 5818.86 | 207.02 | o |
| 3922 | 1 | 9   | 13 | 7 | 2.64    | 12.74   | 6.37   | < |
| 3923 | 1 | 10  | 13 | 7 | 383.30  | 359.90  | 15.92  | o |
| 3924 | 1 | 12  | 13 | 7 | 32.77   | 22.29   | 6.37   | o |
| 3925 | 1 | -11 | 14 | 7 | 16.15   | 25.48   | 6.37   | o |
| 3926 | 1 | -10 | 14 | 7 | 332.26  | 382.19  | 22.29  | o |
| 3927 | 1 | -9  | 14 | 7 | 97.14   | 117.84  | 9.55   | o |
| 3928 | 1 | -8  | 14 | 7 | 96.60   | 89.18   | 22.29  | o |
| 3929 | 1 | -7  | 14 | 7 | 119.60  | 108.29  | 6.37   | o |
| 3930 | 1 | -6  | 14 | 7 | 47.81   | 47.77   | 3.18   | o |
| 3931 | 1 | -5  | 14 | 7 | 45.19   | 41.40   | 3.18   | o |
| 3932 | 1 | -4  | 14 | 7 | 462.97  | 401.30  | 15.92  | o |
| 3933 | 1 | -1  | 14 | 7 | 665.31  | 614.69  | 25.48  | o |
| 3934 | 1 | 0   | 14 | 7 | 85.23   | 98.73   | 6.37   | o |
| 3935 | 1 | 1   | 14 | 7 | 279.41  | 391.75  | 15.92  | o |
| 3936 | 1 | 2   | 14 | 7 | 923.15  | 898.15  | 31.85  | o |
| 3937 | 1 | 3   | 14 | 7 | 114.59  | 136.95  | 9.55   | o |
| 3938 | 1 | 4   | 14 | 7 | 319.95  | 347.16  | 15.92  | o |
| 3939 | 1 | 5   | 14 | 7 | 13.14   | 12.74   | 3.18   | o |
| 3940 | 1 | 6   | 14 | 7 | 42.42   | 38.22   | 3.18   | o |
| 3941 | 1 | 7   | 14 | 7 | 22.44   | 9.55    | 114.66 | < |
| 3942 | 1 | 8   | 14 | 7 | 298.15  | 257.98  | 12.74  | o |
| 3943 | 1 | 9   | 14 | 7 | 36.37   | 54.14   | 12.74  | o |
| 3944 | 1 | 10  | 14 | 7 | 278.58  | 277.09  | 19.11  | o |
| 3945 | 1 | 11  | 14 | 7 | 41.73   | 57.33   | 9.55   | o |
| 3946 | 1 | 12  | 14 | 7 | 14.67   | 19.11   | 38.22  | < |
| 3947 | 1 | -11 | 15 | 7 | 486.92  | 458.63  | 31.85  | o |
| 3948 | 1 | -9  | 15 | 7 | 435.79  | 375.82  | 19.11  | o |
| 3949 | 1 | -8  | 15 | 7 | 8429.83 | 8360.43 | 296.20 | o |
| 3950 | 1 | -6  | 15 | 7 | 75.60   | 70.07   | 6.37   | o |
| 3951 | 1 | -4  | 15 | 7 | 1849.48 | 1837.70 | 60.51  | o |
| 3952 | 1 | -3  | 15 | 7 | 921.15  | 828.08  | 28.66  | o |
| 3953 | 1 | -1  | 15 | 7 | 2466.29 | 3344.17 | 121.03 | o |
| 3954 | 1 | 1   | 15 | 7 | 3008.78 | 3812.36 | 168.80 | o |
| 3955 | 1 | 2   | 15 | 7 | 356.83  | 391.75  | 19.11  | o |
| 3956 | 1 | 3   | 15 | 7 | 581.83  | 576.47  | 22.29  | o |
| 3957 | 1 | 4   | 15 | 7 | 1607.08 | 1840.89 | 60.51  | o |
| 3958 | 1 | 6   | 15 | 7 | 187.73  | 162.43  | 9.55   | o |
| 3959 | 1 | 7   | 15 | 7 | 4.71    | 79.62   | 19.11  | o |
| 3960 | 1 | 8   | 15 | 7 | 7474.77 | 7223.42 | 257.98 | o |
| 3961 | 1 | 9   | 15 | 7 | 228.51  | 232.50  | 15.92  | o |
| 3962 | 1 | 10  | 15 | 7 | 0.40    | 60.51   | 31.85  | < |
| 3963 | 1 | 11  | 15 | 7 | 370.40  | 382.19  | 165.62 | < |
| 3964 | 1 | 12  | 15 | 7 | 220.74  | 165.62  | 293.01 | < |
| 3965 | 1 | -11 | 16 | 7 | 0.57    | 15.92   | 6.37   | < |
| 3966 | 1 | -10 | 16 | 7 | 231.36  | 251.61  | 25.48  | o |
| 3967 | 1 | -9  | 16 | 7 | 610.87  | 560.55  | 25.48  | o |
| 3968 | 1 | -8  | 16 | 7 | 12.32   | 9.55    | 57.33  | < |
| 3969 | 1 | -7  | 16 | 7 | 0.16    | 0.00    | 22.29  | < |
| 3970 | 1 | -6  | 16 | 7 | 395.54  | 350.34  | 15.92  | o |
| 3971 | 1 | -5  | 16 | 7 | 7.08    | 6.37    | 98.73  | < |
| 3972 | 1 | -4  | 16 | 7 | 7.71    | 22.29   | 6.37   | o |
| 3973 | 1 | -3  | 16 | 7 | 146.01  | 127.40  | 6.37   | o |
| 3974 | 1 | -2  | 16 | 7 | 594.59  | 541.44  | 19.11  | o |
| 3975 | 1 | -1  | 16 | 7 | 394.88  | 398.12  | 19.11  | o |
| 3976 | 1 | 0   | 16 | 7 | 2168.50 | 2582.98 | 82.81  | o |
| 3977 | 1 | 1   | 16 | 7 | 338.19  | 407.67  | 15.92  | o |

|      |   |     |    |   |         |         |        |   |
|------|---|-----|----|---|---------|---------|--------|---|
| 3978 | 1 | 3   | 16 | 7 | 83.02   | 101.92  | 9.55   | o |
| 3979 | 1 | 4   | 16 | 7 | 166.11  | 140.14  | 9.55   | o |
| 3980 | 1 | 5   | 16 | 7 | 106.88  | 95.55   | 6.37   | o |
| 3981 | 1 | 6   | 16 | 7 | 13.43   | 6.37    | 19.11  | < |
| 3982 | 1 | 7   | 16 | 7 | 149.31  | 136.95  | 9.55   | o |
| 3983 | 1 | 8   | 16 | 7 | 267.99  | 277.09  | 15.92  | o |
| 3984 | 1 | 9   | 16 | 7 | 221.46  | 165.62  | 41.40  | o |
| 3985 | 1 | 10  | 16 | 7 | 36.72   | 19.11   | 60.51  | < |
| 3986 | 1 | 11  | 16 | 7 | 5.01    | 6.37    | 6.37   | < |
| 3987 | 1 | -11 | 17 | 7 | 342.63  | 331.23  | 22.29  | o |
| 3988 | 1 | -10 | 17 | 7 | 488.03  | 404.49  | 25.48  | o |
| 3989 | 1 | -9  | 17 | 7 | 1340.80 | 1273.97 | 57.33  | o |
| 3990 | 1 | -8  | 17 | 7 | 5064.46 | 4939.82 | 439.52 | o |
| 3991 | 1 | -7  | 17 | 7 | 1197.43 | 1127.46 | 47.77  | o |
| 3992 | 1 | -6  | 17 | 7 | 28.40   | 28.66   | 3.18   | o |
| 3993 | 1 | -5  | 17 | 7 | 349.51  | 331.23  | 15.92  | o |
| 3994 | 1 | -4  | 17 | 7 | 2031.27 | 2404.62 | 76.44  | o |
| 3995 | 1 | -3  | 17 | 7 | 356.18  | 391.75  | 19.11  | o |
| 3996 | 1 | -1  | 17 | 7 | 7396.77 | 7962.32 | 242.05 | o |
| 3997 | 1 | 0   | 17 | 7 | 145.94  | 191.10  | 9.55   | o |
| 3998 | 1 | 2   | 17 | 7 | 146.46  | 197.46  | 9.55   | o |
| 3999 | 1 | 3   | 17 | 7 | 926.15  | 879.04  | 35.03  | o |
| 4000 | 1 | 4   | 17 | 7 | 3963.78 | 3805.99 | 117.84 | o |
| 4001 | 1 | 6   | 17 | 7 | 2.02    | 9.55    | 25.48  | < |
| 4002 | 1 | 7   | 17 | 7 | 968.13  | 1079.69 | 44.59  | o |
| 4003 | 1 | 8   | 17 | 7 | 3114.62 | 2595.72 | 101.92 | o |
| 4004 | 1 | 9   | 17 | 7 | 1396.68 | 1108.35 | 162.43 | o |
| 4005 | 1 | 10  | 17 | 7 | 128.40  | 85.99   | 181.54 | < |
| 4006 | 1 | -11 | 18 | 7 | 0.11    | -6.37   | 3.18   | < |
| 4007 | 1 | -10 | 18 | 7 | 182.85  | 207.02  | 15.92  | o |
| 4008 | 1 | -9  | 18 | 7 | 293.20  | 286.64  | 19.11  | o |
| 4009 | 1 | -8  | 18 | 7 | 4.90    | 3.18    | 15.92  | < |
| 4010 | 1 | -7  | 18 | 7 | 12.43   | 12.74   | 6.37   | < |
| 4011 | 1 | -6  | 18 | 7 | 108.46  | 79.62   | 6.37   | o |
| 4012 | 1 | -5  | 18 | 7 | 11.16   | 19.11   | 3.18   | o |
| 4013 | 1 | -4  | 18 | 7 | 498.69  | 423.60  | 19.11  | o |
| 4014 | 1 | -3  | 18 | 7 | 45.94   | 70.07   | 6.37   | o |
| 4015 | 1 | -2  | 18 | 7 | 729.19  | 879.04  | 31.85  | o |
| 4016 | 1 | -1  | 18 | 7 | 162.00  | 168.80  | 9.55   | o |
| 4017 | 1 | 0   | 18 | 7 | 706.65  | 745.27  | 25.48  | o |
| 4018 | 1 | 1   | 18 | 7 | 168.02  | 156.06  | 9.55   | o |
| 4019 | 1 | 2   | 18 | 7 | 1127.52 | 1172.05 | 38.22  | o |
| 4020 | 1 | 4   | 18 | 7 | 598.03  | 560.55  | 22.29  | o |
| 4021 | 1 | 5   | 18 | 7 | 48.73   | 47.77   | 6.37   | o |
| 4022 | 1 | 6   | 18 | 7 | 22.70   | 38.22   | 6.37   | o |
| 4023 | 1 | 7   | 18 | 7 | 66.30   | 57.33   | 6.37   | o |
| 4024 | 1 | 8   | 18 | 7 | 78.16   | 85.99   | 6.37   | o |
| 4025 | 1 | 9   | 18 | 7 | 21.98   | 19.11   | 22.29  | < |
| 4026 | 1 | -10 | 19 | 7 | 312.22  | 283.46  | 25.48  | o |
| 4027 | 1 | -9  | 19 | 7 | 5.94    | 25.48   | 6.37   | o |
| 4028 | 1 | -8  | 19 | 7 | 524.36  | 436.33  | 76.44  | o |
| 4029 | 1 | -7  | 19 | 7 | 50.00   | 79.62   | 6.37   | o |
| 4030 | 1 | -6  | 19 | 7 | 996.28  | 866.30  | 35.03  | o |
| 4031 | 1 | -5  | 19 | 7 | 258.99  | 280.27  | 12.74  | o |
| 4032 | 1 | -4  | 19 | 7 | 1384.09 | 1264.42 | 47.77  | o |
| 4033 | 1 | -3  | 19 | 7 | 394.37  | 318.49  | 15.92  | o |
| 4034 | 1 | -2  | 19 | 7 | 3398.88 | 3920.65 | 121.03 | o |
| 4035 | 1 | -1  | 19 | 7 | 134.60  | 162.43  | 9.55   | o |

|      |   |    |    |   |         |         |        |   |
|------|---|----|----|---|---------|---------|--------|---|
| 4036 | 1 | 0  | 19 | 7 | 76.07   | 82.81   | 6.37   | o |
| 4037 | 1 | 2  | 19 | 7 | 3718.04 | 4137.22 | 130.58 | o |
| 4038 | 1 | 3  | 19 | 7 | 239.01  | 261.16  | 15.92  | o |
| 4039 | 1 | 4  | 19 | 7 | 1483.89 | 1512.84 | 50.96  | o |
| 4040 | 1 | 5  | 19 | 7 | 163.49  | 191.10  | 9.55   | o |
| 4041 | 1 | 6  | 19 | 7 | 897.07  | 930.00  | 31.85  | o |
| 4042 | 1 | 8  | 19 | 7 | 706.89  | 646.54  | 85.99  | o |
| 4043 | 1 | 9  | 19 | 7 | 5.88    | 28.66   | 6.37   | o |
| 4044 | 1 | -9 | 20 | 7 | 221.48  | 257.98  | 25.48  | o |
| 4045 | 1 | -8 | 20 | 7 | 467.17  | 449.08  | 194.28 | < |
| 4046 | 1 | -7 | 20 | 7 | 0.91    | 6.37    | 3.18   | < |
| 4047 | 1 | -6 | 20 | 7 | 370.04  | 261.16  | 15.92  | o |
| 4048 | 1 | -5 | 20 | 7 | 0.87    | 19.11   | 6.37   | o |
| 4049 | 1 | -4 | 20 | 7 | 40.34   | 41.40   | 6.37   | o |
| 4050 | 1 | -3 | 20 | 7 | 13.70   | 19.11   | 3.18   | o |
| 4051 | 1 | -2 | 20 | 7 | 256.23  | 219.76  | 9.55   | o |
| 4052 | 1 | 0  | 20 | 7 | 638.96  | 636.98  | 25.48  | o |
| 4053 | 1 | 1  | 20 | 7 | 82.03   | 92.36   | 6.37   | o |
| 4054 | 1 | 2  | 20 | 7 | 143.52  | 159.25  | 9.55   | o |
| 4055 | 1 | 3  | 20 | 7 | 77.80   | 60.51   | 6.37   | o |
| 4056 | 1 | 4  | 20 | 7 | 60.47   | 60.51   | 6.37   | o |
| 4057 | 1 | 5  | 20 | 7 | 12.71   | 28.66   | 3.18   | o |
| 4058 | 1 | 6  | 20 | 7 | 978.23  | 942.74  | 31.85  | o |
| 4059 | 1 | 7  | 20 | 7 | 8.41    | 15.92   | 3.18   | o |
| 4060 | 1 | 8  | 20 | 7 | 153.62  | 127.40  | 19.11  | o |
| 4061 | 1 | -8 | 21 | 7 | 12.39   | 12.74   | 6.37   | < |
| 4062 | 1 | -7 | 21 | 7 | 782.32  | 694.31  | 50.96  | o |
| 4063 | 1 | -6 | 21 | 7 | 62.23   | 35.03   | 57.33  | < |
| 4064 | 1 | -4 | 21 | 7 | 264.64  | 238.87  | 12.74  | o |
| 4065 | 1 | -3 | 21 | 7 | 987.43  | 812.16  | 28.66  | o |
| 4066 | 1 | -2 | 21 | 7 | 3210.88 | 2672.15 | 98.73  | o |
| 4067 | 1 | -1 | 21 | 7 | 103.83  | 101.92  | 9.55   | o |
| 4068 | 1 | 2  | 21 | 7 | 1327.67 | 1637.05 | 70.07  | o |
| 4069 | 1 | 3  | 21 | 7 | 513.55  | 595.58  | 22.29  | o |
| 4070 | 1 | 6  | 21 | 7 | 207.21  | 168.80  | 9.55   | o |
| 4071 | 1 | 7  | 21 | 7 | 752.83  | 614.69  | 28.66  | o |
| 4072 | 1 | 8  | 21 | 7 | 7.66    | 9.55    | 6.37   | < |
| 4073 | 1 | -7 | 22 | 7 | 240.42  | 216.57  | 15.92  | o |
| 4074 | 1 | -6 | 22 | 7 | 48.84   | 57.33   | 6.37   | o |
| 4075 | 1 | -5 | 22 | 7 | 35.07   | 50.96   | 6.37   | o |
| 4076 | 1 | -4 | 22 | 7 | 1416.43 | 1232.57 | 41.40  | o |
| 4077 | 1 | -3 | 22 | 7 | 464.90  | 442.70  | 22.29  | o |
| 4078 | 1 | -2 | 22 | 7 | 212.44  | 242.05  | 12.74  | o |
| 4079 | 1 | -1 | 22 | 7 | 0.47    | 12.74   | 3.18   | o |
| 4080 | 1 | 0  | 22 | 7 | 1101.66 | 1191.16 | 47.77  | o |
| 4081 | 1 | 1  | 22 | 7 | 9.94    | 25.48   | 3.18   | o |
| 4082 | 1 | 2  | 22 | 7 | 279.60  | 257.98  | 12.74  | o |
| 4083 | 1 | 3  | 22 | 7 | 579.99  | 570.10  | 22.29  | o |
| 4084 | 1 | 4  | 22 | 7 | 707.99  | 828.08  | 28.66  | o |
| 4085 | 1 | 5  | 22 | 7 | 35.79   | 57.33   | 6.37   | o |
| 4086 | 1 | 6  | 22 | 7 | 19.66   | 22.29   | 6.37   | o |
| 4087 | 1 | 7  | 22 | 7 | 26.00   | 22.29   | 9.55   | < |
| 4088 | 1 | 8  | 22 | 7 | 15.89   | 9.55    | 15.92  | < |
| 4089 | 1 | -6 | 23 | 7 | 475.88  | 331.23  | 31.85  | o |
| 4090 | 1 | -5 | 23 | 7 | 1105.26 | 847.19  | 35.03  | o |
| 4091 | 1 | -4 | 23 | 7 | 331.95  | 299.38  | 19.11  | o |
| 4092 | 1 | -3 | 23 | 7 | 6.83    | 35.03   | 38.22  | < |
| 4093 | 1 | -2 | 23 | 7 | 5721.96 | 6334.82 | 194.28 | o |

|      |   |     |    |   |          |          |         |   |
|------|---|-----|----|---|----------|----------|---------|---|
| 4094 | 1 | -1  | 23 | 7 | 1064.29  | 1420.48  | 47.77   | o |
| 4095 | 1 | 1   | 23 | 7 | 1752.14  | 1828.15  | 60.51   | o |
| 4096 | 1 | 2   | 23 | 7 | 6799.90  | 7366.74  | 226.13  | o |
| 4097 | 1 | 3   | 23 | 7 | 126.69   | 114.66   | 6.37    | o |
| 4098 | 1 | 4   | 23 | 7 | 722.79   | 589.21   | 25.48   | o |
| 4099 | 1 | 5   | 23 | 7 | 772.26   | 605.14   | 31.85   | o |
| 4100 | 1 | 6   | 23 | 7 | 154.95   | 165.62   | 15.92   | o |
| 4101 | 1 | 7   | 23 | 7 | 81.50    | 73.25    | 9.55    | o |
| 4102 | 1 | -6  | 24 | 7 | 942.36   | 859.93   | 60.51   | o |
| 4103 | 1 | -5  | 24 | 7 | 83.28    | 79.62    | 9.55    | o |
| 4104 | 1 | -4  | 24 | 7 | 1.19     | 19.11    | 6.37    | o |
| 4105 | 1 | -3  | 24 | 7 | 47.83    | 47.77    | 6.37    | o |
| 4106 | 1 | -2  | 24 | 7 | 69.96    | 57.33    | 9.55    | o |
| 4107 | 1 | -1  | 24 | 7 | 36.20    | 38.22    | 3.18    | o |
| 4108 | 1 | 0   | 24 | 7 | 342.88   | 337.60   | 15.92   | o |
| 4109 | 1 | 1   | 24 | 7 | 21.06    | 22.29    | 3.18    | o |
| 4110 | 1 | 2   | 24 | 7 | 12.05    | 15.92    | 6.37    | < |
| 4111 | 1 | 3   | 24 | 7 | 4.82     | 19.11    | 3.18    | o |
| 4112 | 1 | 4   | 24 | 7 | 104.64   | 89.18    | 9.55    | o |
| 4113 | 1 | 5   | 24 | 7 | 21.65    | 47.77    | 6.37    | o |
| 4114 | 1 | 6   | 24 | 7 | 896.26   | 780.31   | 41.40   | o |
| 4115 | 1 | 7   | 24 | 7 | 61.11    | 108.29   | 9.55    | o |
| 4116 | 1 | -5  | 25 | 7 | 116.61   | 111.47   | 9.55    | o |
| 4117 | 1 | -4  | 25 | 7 | 784.80   | 758.01   | 41.40   | o |
| 4118 | 1 | -3  | 25 | 7 | 219.77   | 280.27   | 19.11   | o |
| 4119 | 1 | -2  | 25 | 7 | 1042.88  | 1051.03  | 50.96   | o |
| 4120 | 1 | -1  | 25 | 7 | 858.48   | 907.70   | 44.59   | o |
| 4121 | 1 | 0   | 25 | 7 | 117.30   | 149.69   | 12.74   | o |
| 4122 | 1 | 1   | 25 | 7 | 698.04   | 751.64   | 38.22   | o |
| 4123 | 1 | 2   | 25 | 7 | 1219.98  | 1156.13  | 79.62   | o |
| 4124 | 1 | 3   | 25 | 7 | 541.21   | 375.82   | 31.85   | o |
| 4125 | 1 | 4   | 25 | 7 | 1503.41  | 1248.49  | 85.99   | o |
| 4126 | 1 | 5   | 25 | 7 | 45.35    | 79.62    | 12.74   | o |
| 4127 | 1 | 6   | 25 | 7 | 1.34     | 73.25    | 15.92   | o |
| 4128 | 1 | -5  | 26 | 7 | 4.80     | 9.55     | 6.37    | < |
| 4129 | 1 | -4  | 26 | 7 | 332.77   | 181.54   | 25.48   | o |
| 4130 | 1 | -3  | 26 | 7 | 186.70   | 178.36   | 22.29   | o |
| 4131 | 1 | -2  | 26 | 7 | 569.30   | 436.33   | 38.22   | o |
| 4132 | 1 | -11 | 0  | 8 | 1.50     | 6.37     | 9.55    | < |
| 4133 | 1 | -10 | 0  | 8 | 131.63   | 130.58   | 12.74   | o |
| 4134 | 1 | -9  | 0  | 8 | 639.67   | 662.47   | 57.33   | o |
| 4135 | 1 | -8  | 0  | 8 | 3666.54  | 3684.96  | 162.43  | o |
| 4136 | 1 | -7  | 0  | 8 | 1427.01  | 2054.28  | 92.36   | o |
| 4137 | 1 | -6  | 0  | 8 | 57539.30 | 65431.10 | 2790.00 | o |
| 4138 | 1 | -5  | 0  | 8 | 6695.85  | 8516.50  | 366.27  | o |
| 4139 | 1 | -4  | 0  | 8 | 35153.60 | 38212.80 | 1630.68 | o |
| 4140 | 1 | -3  | 0  | 8 | 6809.26  | 7070.54  | 305.75  | o |
| 4141 | 1 | -2  | 0  | 8 | 9145.18  | 9510.19  | 407.67  | o |
| 4142 | 1 | -1  | 0  | 8 | 619.49   | 621.06   | 28.66   | o |
| 4143 | 1 | 0   | 0  | 8 | 20.38    | 28.66    | 6.37    | o |
| 4144 | 1 | 1   | 0  | 8 | 268.87   | 324.86   | 25.48   | o |
| 4145 | 1 | 2   | 0  | 8 | 10179.70 | 9714.03  | 417.23  | o |
| 4146 | 1 | 3   | 0  | 8 | 9726.93  | 8615.23  | 369.45  | o |
| 4147 | 1 | 4   | 0  | 8 | 29599.20 | 26103.70 | 1114.72 | o |
| 4148 | 1 | 5   | 0  | 8 | 6029.53  | 5834.79  | 251.61  | o |
| 4149 | 1 | 6   | 0  | 8 | 52856.80 | 53853.90 | 2296.33 | o |
| 4150 | 1 | 7   | 0  | 8 | 49.46    | 547.81   | 203.84  | < |
| 4151 | 1 | 8   | 0  | 8 | 2576.04  | 2774.07  | 124.21  | o |

|      |   |     |   |   |          |          |        |   |
|------|---|-----|---|---|----------|----------|--------|---|
| 4152 | 1 | 9   | 0 | 8 | 1929.90  | 2082.94  | 95.55  | o |
| 4153 | 1 | 10  | 0 | 8 | 11.11    | 22.29    | 9.55   | < |
| 4154 | 1 | 11  | 0 | 8 | 207.73   | 213.39   | 15.92  | o |
| 4155 | 1 | 12  | 0 | 8 | 217.44   | 187.91   | 15.92  | o |
| 4156 | 1 | -11 | 1 | 8 | 7.61     | 9.55     | 3.18   | o |
| 4157 | 1 | -10 | 1 | 8 | 671.06   | 748.46   | 35.03  | o |
| 4158 | 1 | -9  | 1 | 8 | 2.25     | 3.18     | 3.18   | < |
| 4159 | 1 | -8  | 1 | 8 | 66.85    | 73.25    | 6.37   | o |
| 4160 | 1 | -7  | 1 | 8 | 124.00   | 127.40   | 9.55   | o |
| 4161 | 1 | -6  | 1 | 8 | 1586.22  | 1789.93  | 57.33  | o |
| 4162 | 1 | -5  | 1 | 8 | 1658.25  | 1761.26  | 57.33  | o |
| 4163 | 1 | -4  | 1 | 8 | 16.58    | 25.48    | 3.18   | o |
| 4164 | 1 | -3  | 1 | 8 | 1233.90  | 1273.97  | 41.40  | o |
| 4165 | 1 | -2  | 1 | 8 | 707.67   | 640.17   | 22.29  | o |
| 4166 | 1 | -1  | 1 | 8 | 292.14   | 280.27   | 9.55   | o |
| 4167 | 1 | 0   | 1 | 8 | 52.42    | 54.14    | 3.18   | o |
| 4168 | 1 | 1   | 1 | 8 | 44.38    | 41.40    | 3.18   | o |
| 4169 | 1 | 2   | 1 | 8 | 95.78    | 70.07    | 6.37   | o |
| 4170 | 1 | 3   | 1 | 8 | 3187.46  | 2987.46  | 92.36  | o |
| 4171 | 1 | 5   | 1 | 8 | 910.14   | 840.82   | 28.66  | o |
| 4172 | 1 | 6   | 1 | 8 | 846.87   | 735.72   | 28.66  | o |
| 4173 | 1 | 7   | 1 | 8 | 628.46   | 643.35   | 22.29  | o |
| 4174 | 1 | 8   | 1 | 8 | 6.87     | 12.74    | 3.18   | o |
| 4175 | 1 | 9   | 1 | 8 | 95.71    | 121.03   | 9.55   | o |
| 4176 | 1 | 10  | 1 | 8 | 130.45   | 111.47   | 9.55   | o |
| 4177 | 1 | 11  | 1 | 8 | 33.25    | 44.59    | 6.37   | o |
| 4178 | 1 | 12  | 1 | 8 | 54.87    | 57.33    | 6.37   | o |
| 4179 | 1 | -11 | 2 | 8 | 23.19    | 38.22    | 6.37   | o |
| 4180 | 1 | -10 | 2 | 8 | 3150.31  | 3032.05  | 117.84 | o |
| 4181 | 1 | -9  | 2 | 8 | 1412.34  | 1484.18  | 50.96  | o |
| 4182 | 1 | -8  | 2 | 8 | 519.11   | 531.88   | 19.11  | o |
| 4183 | 1 | -7  | 2 | 8 | 268.96   | 264.35   | 12.74  | o |
| 4184 | 1 | -6  | 2 | 8 | 652.62   | 735.72   | 25.48  | o |
| 4185 | 1 | -5  | 2 | 8 | 1054.75  | 955.48   | 31.85  | o |
| 4186 | 1 | -4  | 2 | 8 | 2136.68  | 2496.98  | 82.81  | o |
| 4187 | 1 | -3  | 2 | 8 | 5468.38  | 5497.18  | 168.80 | o |
| 4188 | 1 | -2  | 2 | 8 | 7404.35  | 8392.28  | 254.79 | o |
| 4189 | 1 | -1  | 2 | 8 | 168.40   | 235.68   | 9.55   | o |
| 4190 | 1 | 0   | 2 | 8 | 6017.78  | 6102.32  | 184.73 | o |
| 4191 | 1 | 1   | 2 | 8 | 556.99   | 528.70   | 19.11  | o |
| 4192 | 1 | 2   | 2 | 8 | 11501.30 | 10675.90 | 324.86 | o |
| 4193 | 1 | 3   | 2 | 8 | 5802.37  | 5618.21  | 171.99 | o |
| 4194 | 1 | 4   | 2 | 8 | 1659.29  | 1640.24  | 50.96  | o |
| 4195 | 1 | 5   | 2 | 8 | 1752.00  | 1522.40  | 47.77  | o |
| 4196 | 1 | 6   | 2 | 8 | 502.80   | 471.37   | 41.40  | o |
| 4197 | 1 | 7   | 2 | 8 | 333.54   | 283.46   | 12.74  | o |
| 4198 | 1 | 8   | 2 | 8 | 912.67   | 920.44   | 31.85  | o |
| 4199 | 1 | 9   | 2 | 8 | 653.27   | 703.87   | 35.03  | o |
| 4200 | 1 | 10  | 2 | 8 | 3001.64  | 3634.00  | 114.66 | o |
| 4201 | 1 | 11  | 2 | 8 | 1.37     | 3.18     | 3.18   | < |
| 4202 | 1 | 12  | 2 | 8 | 413.60   | 398.12   | 19.11  | o |
| 4203 | 1 | -11 | 3 | 8 | 177.13   | 181.54   | 19.11  | o |
| 4204 | 1 | -10 | 3 | 8 | 9.69     | 9.55     | 3.18   | o |
| 4205 | 1 | -9  | 3 | 8 | 25.33    | 19.11    | 3.18   | o |
| 4206 | 1 | -8  | 3 | 8 | 37.31    | 28.66    | 3.18   | o |
| 4207 | 1 | -7  | 3 | 8 | 0.52     | 3.18     | 3.18   | < |
| 4208 | 1 | -6  | 3 | 8 | 122.63   | 130.58   | 22.29  | o |
| 4209 | 1 | -5  | 3 | 8 | 40.76    | 12.74    | 70.07  | < |

|      |   |     |   |   |          |          |         |   |
|------|---|-----|---|---|----------|----------|---------|---|
| 4210 | 1 | -4  | 3 | 8 | 1124.22  | 1146.57  | 38.22   | o |
| 4211 | 1 | -3  | 3 | 8 | 1072.53  | 1146.57  | 38.22   | o |
| 4212 | 1 | -2  | 3 | 8 | 689.27   | 684.76   | 22.29   | o |
| 4213 | 1 | 0   | 3 | 8 | 39.91    | 35.03    | 3.18    | o |
| 4214 | 1 | 1   | 3 | 8 | 727.82   | 754.83   | 25.48   | o |
| 4215 | 1 | 2   | 3 | 8 | 363.02   | 385.38   | 15.92   | o |
| 4216 | 1 | 3   | 3 | 8 | 1218.02  | 1146.57  | 38.22   | o |
| 4217 | 1 | 4   | 3 | 8 | 22.01    | 6.37     | 57.33   | < |
| 4218 | 1 | 5   | 3 | 8 | 587.23   | 582.84   | 22.29   | o |
| 4219 | 1 | 6   | 3 | 8 | 383.77   | 353.53   | 15.92   | o |
| 4220 | 1 | 7   | 3 | 8 | 4.77     | 9.55     | 3.18    | o |
| 4221 | 1 | 8   | 3 | 8 | 3.58     | 0.00     | 3.18    | < |
| 4222 | 1 | 9   | 3 | 8 | 125.09   | 149.69   | 9.55    | o |
| 4223 | 1 | 10  | 3 | 8 | 4.05     | 12.74    | 3.18    | o |
| 4224 | 1 | 11  | 3 | 8 | 323.56   | 363.08   | 15.92   | o |
| 4225 | 1 | 12  | 3 | 8 | 509.47   | 538.25   | 22.29   | o |
| 4226 | 1 | -11 | 4 | 8 | 238.77   | 305.75   | 19.11   | o |
| 4227 | 1 | -10 | 4 | 8 | 2490.49  | 2554.31  | 92.36   | o |
| 4228 | 1 | -9  | 4 | 8 | 307.27   | 267.53   | 12.74   | o |
| 4229 | 1 | -8  | 4 | 8 | 3586.05  | 3653.11  | 114.66  | o |
| 4230 | 1 | -7  | 4 | 8 | 2923.31  | 3334.62  | 130.58  | o |
| 4231 | 1 | -6  | 4 | 8 | 2241.61  | 2458.76  | 76.44   | o |
| 4232 | 1 | -5  | 4 | 8 | 243.72   | 334.42   | 12.74   | o |
| 4233 | 1 | -4  | 4 | 8 | 1925.37  | 2076.57  | 66.88   | o |
| 4234 | 1 | -3  | 4 | 8 | 5781.76  | 6634.20  | 203.84  | o |
| 4235 | 1 | -2  | 4 | 8 | 2594.24  | 2640.30  | 82.81   | o |
| 4236 | 1 | -1  | 4 | 8 | 4763.44  | 5812.49  | 178.36  | o |
| 4237 | 1 | 0   | 4 | 8 | 56343.50 | 59822.50 | 1802.67 | o |
| 4238 | 1 | 1   | 4 | 8 | 5834.17  | 6490.88  | 197.46  | o |
| 4239 | 1 | 2   | 4 | 8 | 2433.47  | 2551.13  | 79.62   | o |
| 4240 | 1 | 3   | 4 | 8 | 8348.06  | 7685.23  | 235.68  | o |
| 4241 | 1 | 4   | 4 | 8 | 3421.69  | 3035.24  | 95.55   | o |
| 4242 | 1 | 6   | 4 | 8 | 1928.85  | 1926.88  | 63.70   | o |
| 4243 | 1 | 7   | 4 | 8 | 785.47   | 793.05   | 79.62   | o |
| 4244 | 1 | 8   | 4 | 8 | 3796.53  | 4137.22  | 130.58  | o |
| 4245 | 1 | 9   | 4 | 8 | 693.87   | 716.61   | 31.85   | o |
| 4246 | 1 | 10  | 4 | 8 | 2303.19  | 2739.04  | 101.92  | o |
| 4247 | 1 | 11  | 4 | 8 | 1.92     | 57.33    | 15.92   | o |
| 4248 | 1 | 12  | 4 | 8 | 4069.26  | 3656.30  | 162.43  | o |
| 4249 | 1 | -11 | 5 | 8 | 6.01     | 3.18     | 3.18    | < |
| 4250 | 1 | -10 | 5 | 8 | 1.22     | -3.18    | 3.18    | < |
| 4251 | 1 | -9  | 5 | 8 | 34.31    | 25.48    | 3.18    | o |
| 4252 | 1 | -8  | 5 | 8 | 695.71   | 691.13   | 25.48   | o |
| 4253 | 1 | -7  | 5 | 8 | 129.63   | 127.40   | 9.55    | o |
| 4254 | 1 | -6  | 5 | 8 | 0.19     | 0.00     | 6.37    | < |
| 4255 | 1 | -5  | 5 | 8 | 477.65   | 404.49   | 57.33   | o |
| 4256 | 1 | -4  | 5 | 8 | 2155.56  | 2309.07  | 73.25   | o |
| 4257 | 1 | -3  | 5 | 8 | 853.21   | 866.30   | 28.66   | o |
| 4258 | 1 | -2  | 5 | 8 | 41.10    | 47.77    | 3.18    | o |
| 4259 | 1 | 0   | 5 | 8 | 82.20    | 85.99    | 6.37    | o |
| 4260 | 1 | 1   | 5 | 8 | 2399.57  | 2264.48  | 70.07   | o |
| 4261 | 1 | 2   | 5 | 8 | 84.41    | 92.36    | 6.37    | o |
| 4262 | 1 | 3   | 5 | 8 | 25.69    | 63.70    | 6.37    | o |
| 4263 | 1 | 4   | 5 | 8 | 1685.24  | 1605.20  | 50.96   | o |
| 4264 | 1 | 5   | 5 | 8 | 1721.40  | 1745.34  | 57.33   | o |
| 4265 | 1 | 6   | 5 | 8 | 38.28    | 60.51    | 6.37    | o |
| 4266 | 1 | 7   | 5 | 8 | 143.82   | 140.14   | 9.55    | o |
| 4267 | 1 | 8   | 5 | 8 | 73.09    | 31.85    | 60.51   | < |



|      |   |     |   |   |          |          |        |   |
|------|---|-----|---|---|----------|----------|--------|---|
| 4268 | 1 | 9   | 5 | 8 | 184.65   | 213.39   | 12.74  | o |
| 4269 | 1 | 10  | 5 | 8 | 89.79    | 98.73    | 6.37   | o |
| 4270 | 1 | 11  | 5 | 8 | 59.78    | 60.51    | 6.37   | o |
| 4271 | 1 | 12  | 5 | 8 | 66.14    | 63.70    | 9.55   | o |
| 4272 | 1 | -11 | 6 | 8 | 13.55    | 73.25    | 31.85  | < |
| 4273 | 1 | -10 | 6 | 8 | 243.15   | 245.24   | 15.92  | o |
| 4274 | 1 | -8  | 6 | 8 | 2763.72  | 2780.44  | 85.99  | o |
| 4275 | 1 | -7  | 6 | 8 | 212.40   | 197.46   | 12.74  | o |
| 4276 | 1 | -6  | 6 | 8 | 5148.36  | 5016.26  | 152.88 | o |
| 4277 | 1 | -4  | 6 | 8 | 25662.10 | 27457.30 | 828.08 | o |
| 4278 | 1 | -3  | 6 | 8 | 5028.23  | 5815.68  | 191.10 | o |
| 4279 | 1 | -2  | 6 | 8 | 42.09    | 70.07    | 6.37   | o |
| 4280 | 1 | -1  | 6 | 8 | 807.45   | 748.46   | 25.48  | o |
| 4281 | 1 | 0   | 6 | 8 | 3116.27  | 3598.97  | 117.84 | o |
| 4282 | 1 | 1   | 6 | 8 | 576.86   | 560.55   | 19.11  | o |
| 4283 | 1 | 2   | 6 | 8 | 16.83    | 15.92    | 3.18   | o |
| 4284 | 1 | 3   | 6 | 8 | 4705.60  | 5013.08  | 152.88 | o |
| 4285 | 1 | 4   | 6 | 8 | 23792.90 | 24052.60 | 726.16 | o |
| 4286 | 1 | 5   | 6 | 8 | 378.57   | 385.38   | 15.92  | o |
| 4287 | 1 | 6   | 6 | 8 | 3787.85  | 3439.72  | 124.21 | o |
| 4288 | 1 | 7   | 6 | 8 | 3.13     | 15.92    | 9.55   | < |
| 4289 | 1 | 8   | 6 | 8 | 2999.04  | 3286.84  | 146.51 | o |
| 4290 | 1 | 10  | 6 | 8 | 74.88    | 70.07    | 6.37   | o |
| 4291 | 1 | 11  | 6 | 8 | 234.69   | 251.61   | 12.74  | o |
| 4292 | 1 | 12  | 6 | 8 | 1397.19  | 1621.13  | 143.32 | o |
| 4293 | 1 | -11 | 7 | 8 | 31.94    | 35.03    | 6.37   | o |
| 4294 | 1 | -10 | 7 | 8 | 54.39    | 60.51    | 6.37   | o |
| 4295 | 1 | -9  | 7 | 8 | 1.97     | 3.18     | 12.74  | < |
| 4296 | 1 | -8  | 7 | 8 | 546.76   | 525.51   | 19.11  | o |
| 4297 | 1 | -7  | 7 | 8 | 196.73   | 178.36   | 12.74  | o |
| 4298 | 1 | -6  | 7 | 8 | 515.34   | 477.74   | 19.11  | o |
| 4299 | 1 | -5  | 7 | 8 | 418.33   | 401.30   | 15.92  | o |
| 4300 | 1 | -4  | 7 | 8 | 192.91   | 171.99   | 9.55   | o |
| 4301 | 1 | -3  | 7 | 8 | 447.47   | 398.12   | 15.92  | o |
| 4302 | 1 | -2  | 7 | 8 | 343.44   | 334.42   | 12.74  | o |
| 4303 | 1 | -1  | 7 | 8 | 790.48   | 859.93   | 28.66  | o |
| 4304 | 1 | 0   | 7 | 8 | 24.17    | 28.66    | 3.18   | o |
| 4305 | 1 | 1   | 7 | 8 | 719.65   | 700.68   | 25.48  | o |
| 4306 | 1 | 2   | 7 | 8 | 270.92   | 261.16   | 12.74  | o |
| 4307 | 1 | 3   | 7 | 8 | 542.84   | 531.88   | 19.11  | o |
| 4308 | 1 | 4   | 7 | 8 | 114.68   | 98.73    | 6.37   | o |
| 4309 | 1 | 5   | 7 | 8 | 657.68   | 643.35   | 28.66  | o |
| 4310 | 1 | 6   | 7 | 8 | 205.62   | 146.51   | 114.66 | < |
| 4311 | 1 | 7   | 7 | 8 | 483.90   | 525.51   | 19.11  | o |
| 4312 | 1 | 8   | 7 | 8 | 58.18    | 35.03    | 95.55  | < |
| 4313 | 1 | 9   | 7 | 8 | 65.36    | 66.88    | 6.37   | o |
| 4314 | 1 | 10  | 7 | 8 | 10.46    | 15.92    | 3.18   | o |
| 4315 | 1 | 11  | 7 | 8 | 79.93    | 76.44    | 6.37   | o |
| 4316 | 1 | 12  | 7 | 8 | 31.96    | 38.22    | 6.37   | o |
| 4317 | 1 | -10 | 8 | 8 | 386.27   | 356.71   | 28.66  | o |
| 4318 | 1 | -9  | 8 | 8 | 350.43   | 324.86   | 15.92  | o |
| 4319 | 1 | -8  | 8 | 8 | 3837.52  | 3560.75  | 130.58 | o |
| 4320 | 1 | -7  | 8 | 8 | 479.81   | 538.25   | 41.40  | o |
| 4321 | 1 | -6  | 8 | 8 | 10115.60 | 10675.90 | 324.86 | o |
| 4322 | 1 | -5  | 8 | 8 | 98.67    | 63.70    | 6.37   | o |
| 4323 | 1 | -4  | 8 | 8 | 1310.66  | 1054.21  | 35.03  | o |
| 4324 | 1 | -3  | 8 | 8 | 9983.46  | 10121.70 | 308.94 | o |
| 4325 | 1 | -2  | 8 | 8 | 11794.50 | 12803.40 | 388.56 | o |

|      |   |     |    |   |          |          |         |   |
|------|---|-----|----|---|----------|----------|---------|---|
| 4326 | 1 | 0   | 8  | 8 | 12086.10 | 13414.90 | 436.33  | o |
| 4327 | 1 | 1   | 8  | 8 | 1432.90  | 1802.67  | 57.33   | o |
| 4328 | 1 | 2   | 8  | 8 | 9936.49  | 10602.60 | 321.68  | o |
| 4329 | 1 | 3   | 8  | 8 | 7661.91  | 8019.65  | 245.24  | o |
| 4330 | 1 | 4   | 8  | 8 | 475.82   | 401.30   | 15.92   | o |
| 4331 | 1 | 5   | 8  | 8 | 276.84   | 312.12   | 15.92   | o |
| 4332 | 1 | 6   | 8  | 8 | 11523.20 | 12548.60 | 382.19  | o |
| 4333 | 1 | 7   | 8  | 8 | 821.47   | 1025.55  | 41.40   | o |
| 4334 | 1 | 8   | 8  | 8 | 2563.45  | 2809.11  | 92.36   | o |
| 4335 | 1 | 9   | 8  | 8 | 28.06    | 22.29    | 15.92   | < |
| 4336 | 1 | 10  | 8  | 8 | 595.77   | 592.40   | 22.29   | o |
| 4337 | 1 | 12  | 8  | 8 | 4740.91  | 4159.52  | 1442.77 | < |
| 4338 | 1 | -11 | 9  | 8 | 221.99   | 232.50   | 15.92   | o |
| 4339 | 1 | -10 | 9  | 8 | 125.98   | 114.66   | 12.74   | o |
| 4340 | 1 | -9  | 9  | 8 | 4.97     | 9.55     | 3.18    | o |
| 4341 | 1 | -8  | 9  | 8 | 138.13   | 121.03   | 15.92   | o |
| 4342 | 1 | -7  | 9  | 8 | 57.53    | 38.22    | 41.40   | < |
| 4343 | 1 | -6  | 9  | 8 | 739.76   | 719.79   | 31.85   | o |
| 4344 | 1 | -5  | 9  | 8 | 326.95   | 296.20   | 12.74   | o |
| 4345 | 1 | -4  | 9  | 8 | 28.74    | 22.29    | 3.18    | o |
| 4346 | 1 | -2  | 9  | 8 | 355.58   | 289.83   | 12.74   | o |
| 4347 | 1 | -1  | 9  | 8 | 1428.46  | 1493.73  | 47.77   | o |
| 4348 | 1 | 0   | 9  | 8 | 101.39   | 105.10   | 6.37    | o |
| 4349 | 1 | 1   | 9  | 8 | 253.38   | 334.42   | 15.92   | o |
| 4350 | 1 | 3   | 9  | 8 | 906.40   | 914.07   | 31.85   | o |
| 4351 | 1 | 4   | 9  | 8 | 45.49    | 66.88    | 6.37    | o |
| 4352 | 1 | 5   | 9  | 8 | 151.56   | 130.58   | 9.55    | o |
| 4353 | 1 | 6   | 9  | 8 | 12.95    | -3.18    | 194.28  | < |
| 4354 | 1 | 7   | 9  | 8 | 486.49   | 487.29   | 19.11   | o |
| 4355 | 1 | 8   | 9  | 8 | 287.82   | 286.64   | 12.74   | o |
| 4356 | 1 | 9   | 9  | 8 | 4.01     | 6.37     | 3.18    | < |
| 4357 | 1 | 10  | 9  | 8 | 238.35   | 245.24   | 12.74   | o |
| 4358 | 1 | 11  | 9  | 8 | 141.75   | 152.88   | 15.92   | o |
| 4359 | 1 | 12  | 9  | 8 | 223.21   | 299.38   | 19.11   | o |
| 4360 | 1 | -11 | 10 | 8 | 45.60    | 50.96    | 6.37    | o |
| 4361 | 1 | -10 | 10 | 8 | 2336.32  | 2379.14  | 108.29  | o |
| 4362 | 1 | -9  | 10 | 8 | 2894.49  | 2777.26  | 111.47  | o |
| 4363 | 1 | -8  | 10 | 8 | 355.72   | 353.53   | 22.29   | o |
| 4364 | 1 | -7  | 10 | 8 | 235.59   | 162.43   | 12.74   | o |
| 4365 | 1 | -6  | 10 | 8 | 18.58    | 28.66    | 3.18    | o |
| 4366 | 1 | -5  | 10 | 8 | 159.43   | 133.77   | 79.62   | < |
| 4367 | 1 | -4  | 10 | 8 | 177.10   | 171.99   | 9.55    | o |
| 4368 | 1 | -2  | 10 | 8 | 8006.88  | 9468.79  | 286.64  | o |
| 4369 | 1 | -1  | 10 | 8 | 34.96    | 57.33    | 6.37    | o |
| 4370 | 1 | 0   | 10 | 8 | 426.38   | 401.30   | 15.92   | o |
| 4371 | 1 | 1   | 10 | 8 | 97.17    | 111.47   | 6.37    | o |
| 4372 | 1 | 2   | 10 | 8 | 8657.24  | 9733.14  | 296.20  | o |
| 4373 | 1 | 4   | 10 | 8 | 106.70   | 130.58   | 6.37    | o |
| 4374 | 1 | 5   | 10 | 8 | 1202.23  | 1092.43  | 41.40   | o |
| 4375 | 1 | 6   | 10 | 8 | 110.35   | 79.62    | 6.37    | o |
| 4376 | 1 | 7   | 10 | 8 | 641.70   | 550.99   | 25.48   | o |
| 4377 | 1 | 8   | 10 | 8 | 231.85   | 222.95   | 12.74   | o |
| 4378 | 1 | 9   | 10 | 8 | 755.02   | 707.05   | 105.10  | o |
| 4379 | 1 | 10  | 10 | 8 | 2189.58  | 2532.02  | 114.66  | o |
| 4380 | 1 | 11  | 10 | 8 | 1.41     | 6.37     | 3.18    | < |
| 4381 | 1 | 12  | 10 | 8 | 118.56   | 121.03   | 12.74   | o |
| 4382 | 1 | -11 | 11 | 8 | 0.40     | 3.18     | 3.18    | < |
| 4383 | 1 | -10 | 11 | 8 | 78.96    | 76.44    | 9.55    | o |

|      |   |     |    |   |          |          |        |   |
|------|---|-----|----|---|----------|----------|--------|---|
| 4384 | 1 | -9  | 11 | 8 | 11.45    | 19.11    | 3.18   | o |
| 4385 | 1 | -8  | 11 | 8 | 0.63     | -6.37    | 9.55   | < |
| 4386 | 1 | -7  | 11 | 8 | 167.24   | 108.29   | 210.21 | < |
| 4387 | 1 | -6  | 11 | 8 | 771.29   | 636.98   | 28.66  | o |
| 4388 | 1 | -5  | 11 | 8 | 1175.09  | 1051.03  | 35.03  | o |
| 4389 | 1 | -4  | 11 | 8 | 7.73     | 22.29    | 3.18   | o |
| 4390 | 1 | -3  | 11 | 8 | 405.40   | 487.29   | 22.29  | o |
| 4391 | 1 | -2  | 11 | 8 | 751.48   | 697.50   | 28.66  | o |
| 4392 | 1 | -1  | 11 | 8 | 84.36    | 82.81    | 6.37   | o |
| 4393 | 1 | 0   | 11 | 8 | 2.71     | 6.37     | 3.18   | < |
| 4394 | 1 | 1   | 11 | 8 | 15.78    | 50.96    | 6.37   | o |
| 4395 | 1 | 2   | 11 | 8 | 215.49   | 273.90   | 15.92  | o |
| 4396 | 1 | 3   | 11 | 8 | 837.67   | 847.19   | 35.03  | o |
| 4397 | 1 | 4   | 11 | 8 | 54.21    | 85.99    | 9.55   | o |
| 4398 | 1 | 5   | 11 | 8 | 1154.11  | 1232.57  | 47.77  | o |
| 4399 | 1 | 6   | 11 | 8 | 305.23   | 245.24   | 15.92  | o |
| 4400 | 1 | 7   | 11 | 8 | 609.37   | 522.33   | 25.48  | o |
| 4401 | 1 | 8   | 11 | 8 | 185.90   | 200.65   | 9.55   | o |
| 4402 | 1 | 9   | 11 | 8 | 2.45     | 6.37     | 3.18   | < |
| 4403 | 1 | 10  | 11 | 8 | 7.37     | 9.55     | 6.37   | < |
| 4404 | 1 | 11  | 11 | 8 | 12.35    | 9.55     | 6.37   | < |
| 4405 | 1 | 12  | 11 | 8 | 3.99     | 9.55     | 6.37   | < |
| 4406 | 1 | -11 | 12 | 8 | 38.73    | 41.40    | 6.37   | o |
| 4407 | 1 | -10 | 12 | 8 | 231.56   | 219.76   | 15.92  | o |
| 4408 | 1 | -9  | 12 | 8 | 655.38   | 586.03   | 25.48  | o |
| 4409 | 1 | -8  | 12 | 8 | 4235.40  | 3477.94  | 127.40 | o |
| 4410 | 1 | -6  | 12 | 8 | 24701.80 | 25078.10 | 758.01 | o |
| 4411 | 1 | -5  | 12 | 8 | 1108.82  | 1477.81  | 57.33  | o |
| 4412 | 1 | -4  | 12 | 8 | 13052.10 | 13405.40 | 471.37 | o |
| 4413 | 1 | -3  | 12 | 8 | 1820.68  | 1783.56  | 57.33  | o |
| 4414 | 1 | -2  | 12 | 8 | 1284.86  | 1350.41  | 44.59  | o |
| 4415 | 1 | -1  | 12 | 8 | 99.78    | 121.03   | 6.37   | o |
| 4416 | 1 | 0   | 12 | 8 | 4263.02  | 5427.12  | 194.28 | o |
| 4417 | 1 | 1   | 12 | 8 | 33.07    | 63.70    | 6.37   | o |
| 4418 | 1 | 2   | 12 | 8 | 911.86   | 1060.58  | 35.03  | o |
| 4419 | 1 | 3   | 12 | 8 | 1750.10  | 1611.57  | 60.51  | o |
| 4420 | 1 | 4   | 12 | 8 | 12497.20 | 12978.60 | 394.93 | o |
| 4421 | 1 | 5   | 12 | 8 | 1886.00  | 2254.93  | 73.25  | o |
| 4422 | 1 | 6   | 12 | 8 | 22719.30 | 23402.80 | 710.24 | o |
| 4423 | 1 | 8   | 12 | 8 | 3433.01  | 3713.62  | 121.03 | o |
| 4424 | 1 | 9   | 12 | 8 | 698.85   | 477.74   | 25.48  | o |
| 4425 | 1 | 10  | 12 | 8 | 188.55   | 165.62   | 9.55   | o |
| 4426 | 1 | 11  | 12 | 8 | 48.11    | 50.96    | 6.37   | o |
| 4427 | 1 | 12  | 12 | 8 | 82.73    | 79.62    | 9.55   | o |
| 4428 | 1 | -11 | 13 | 8 | 9.65     | 12.74    | 6.37   | < |
| 4429 | 1 | -10 | 13 | 8 | 51.70    | 63.70    | 9.55   | o |
| 4430 | 1 | -9  | 13 | 8 | 11.35    | 19.11    | 3.18   | o |
| 4431 | 1 | -8  | 13 | 8 | 436.31   | 398.12   | 15.92  | o |
| 4432 | 1 | -7  | 13 | 8 | 324.90   | 277.09   | 12.74  | o |
| 4433 | 1 | -6  | 13 | 8 | 507.41   | 455.45   | 19.11  | o |
| 4434 | 1 | -5  | 13 | 8 | 242.48   | 213.39   | 12.74  | o |
| 4435 | 1 | -4  | 13 | 8 | 336.41   | 302.57   | 12.74  | o |
| 4436 | 1 | -3  | 13 | 8 | 800.32   | 748.46   | 25.48  | o |
| 4437 | 1 | -2  | 13 | 8 | 400.00   | 328.05   | 15.92  | o |
| 4438 | 1 | 0   | 13 | 8 | 122.69   | 111.47   | 6.37   | o |
| 4439 | 1 | 1   | 13 | 8 | 306.51   | 299.38   | 12.74  | o |
| 4440 | 1 | 2   | 13 | 8 | 178.52   | 194.28   | 12.74  | o |
| 4441 | 1 | 3   | 13 | 8 | 283.39   | 308.94   | 12.74  | o |

|      |   |     |    |   |         |         |        |   |
|------|---|-----|----|---|---------|---------|--------|---|
| 4442 | 1 | 4   | 13 | 8 | 217.88  | 216.57  | 12.74  | o |
| 4443 | 1 | 5   | 13 | 8 | 1010.78 | 1066.95 | 41.40  | o |
| 4444 | 1 | 6   | 13 | 8 | 129.75  | 89.18   | 165.62 | < |
| 4445 | 1 | 7   | 13 | 8 | 361.42  | 324.86  | 15.92  | o |
| 4446 | 1 | 8   | 13 | 8 | 113.19  | 57.33   | 89.18  | < |
| 4447 | 1 | 9   | 13 | 8 | 101.69  | 76.44   | 6.37   | o |
| 4448 | 1 | 10  | 13 | 8 | 2.88    | 0.00    | 3.18   | < |
| 4449 | 1 | 11  | 13 | 8 | 8.38    | 9.55    | 6.37   | < |
| 4450 | 1 | 12  | 13 | 8 | 38.11   | 28.66   | 6.37   | o |
| 4451 | 1 | -11 | 14 | 8 | 76.61   | 79.62   | 9.55   | o |
| 4452 | 1 | -10 | 14 | 8 | 935.83  | 977.77  | 66.88  | o |
| 4453 | 1 | -8  | 14 | 8 | 874.80  | 767.57  | 66.88  | o |
| 4454 | 1 | -7  | 14 | 8 | 211.94  | 242.05  | 12.74  | o |
| 4455 | 1 | -6  | 14 | 8 | 92.88   | 66.88   | 6.37   | o |
| 4456 | 1 | -5  | 14 | 8 | 1249.25 | 987.33  | 35.03  | o |
| 4457 | 1 | -4  | 14 | 8 | 5847.44 | 5850.71 | 181.54 | o |
| 4458 | 1 | -3  | 14 | 8 | 406.96  | 503.22  | 22.29  | o |
| 4459 | 1 | -2  | 14 | 8 | 132.41  | 194.28  | 9.55   | o |
| 4460 | 1 | -1  | 14 | 8 | 54.69   | 60.51   | 6.37   | o |
| 4461 | 1 | 0   | 14 | 8 | 829.69  | 758.01  | 31.85  | o |
| 4462 | 1 | 1   | 14 | 8 | 42.60   | 47.77   | 6.37   | o |
| 4463 | 1 | 2   | 14 | 8 | 383.29  | 356.71  | 15.92  | o |
| 4464 | 1 | 3   | 14 | 8 | 989.98  | 993.70  | 35.03  | o |
| 4465 | 1 | 4   | 14 | 8 | 5884.00 | 6455.85 | 197.46 | o |
| 4466 | 1 | 5   | 14 | 8 | 301.82  | 280.27  | 12.74  | o |
| 4467 | 1 | 6   | 14 | 8 | 190.88  | 197.46  | 9.55   | o |
| 4468 | 1 | 8   | 14 | 8 | 1551.50 | 1385.44 | 54.14  | o |
| 4469 | 1 | 9   | 14 | 8 | 259.73  | 308.94  | 15.92  | o |
| 4470 | 1 | 10  | 14 | 8 | 628.10  | 531.88  | 130.58 | o |
| 4471 | 1 | 11  | 14 | 8 | 49.48   | 44.59   | 6.37   | o |
| 4472 | 1 | -11 | 15 | 8 | 71.52   | 76.44   | 9.55   | o |
| 4473 | 1 | -10 | 15 | 8 | 13.24   | 25.48   | 9.55   | < |
| 4474 | 1 | -9  | 15 | 8 | 169.55  | 165.62  | 35.03  | o |
| 4475 | 1 | -8  | 15 | 8 | 1005.35 | 955.48  | 35.03  | o |
| 4476 | 1 | -7  | 15 | 8 | 41.15   | 50.96   | 6.37   | o |
| 4477 | 1 | -6  | 15 | 8 | 264.20  | 213.39  | 9.55   | o |
| 4478 | 1 | -5  | 15 | 8 | 23.24   | 12.74   | 25.48  | < |
| 4479 | 1 | -4  | 15 | 8 | 732.17  | 586.03  | 22.29  | o |
| 4480 | 1 | -3  | 15 | 8 | 783.33  | 672.02  | 25.48  | o |
| 4481 | 1 | -1  | 15 | 8 | 141.26  | 242.05  | 15.92  | o |
| 4482 | 1 | 1   | 15 | 8 | 877.35  | 777.12  | 28.66  | o |
| 4483 | 1 | 2   | 15 | 8 | 28.72   | 41.40   | 3.18   | o |
| 4484 | 1 | 3   | 15 | 8 | 339.58  | 363.08  | 19.11  | o |
| 4485 | 1 | 5   | 15 | 8 | 468.92  | 455.45  | 19.11  | o |
| 4486 | 1 | 6   | 15 | 8 | 220.65  | 200.65  | 9.55   | o |
| 4487 | 1 | 7   | 15 | 8 | 129.09  | 121.03  | 9.55   | o |
| 4488 | 1 | 8   | 15 | 8 | 660.07  | 582.84  | 47.77  | o |
| 4489 | 1 | 9   | 15 | 8 | 217.00  | 168.80  | 12.74  | o |
| 4490 | 1 | 10  | 15 | 8 | 2.26    | 12.74   | 3.18   | o |
| 4491 | 1 | 11  | 15 | 8 | 272.14  | 242.05  | 25.48  | o |
| 4492 | 1 | -11 | 16 | 8 | 123.74  | 146.51  | 12.74  | o |
| 4493 | 1 | -10 | 16 | 8 | 2937.74 | 3274.11 | 146.51 | o |
| 4494 | 1 | -9  | 16 | 8 | 425.25  | 401.30  | 25.48  | o |
| 4495 | 1 | -8  | 16 | 8 | 712.31  | 487.29  | 175.17 | < |
| 4496 | 1 | -7  | 16 | 8 | 1270.58 | 1159.31 | 50.96  | o |
| 4497 | 1 | -6  | 16 | 8 | 992.01  | 789.86  | 35.03  | o |
| 4498 | 1 | -5  | 16 | 8 | 117.82  | 121.03  | 6.37   | o |
| 4499 | 1 | -4  | 16 | 8 | 1917.07 | 1586.09 | 60.51  | o |

|      |   |     |    |   |          |          |         |   |
|------|---|-----|----|---|----------|----------|---------|---|
| 4500 | 1 | -3  | 16 | 8 | 1133.47  | 1187.98  | 47.77   | o |
| 4501 | 1 | -2  | 16 | 8 | 2948.11  | 3258.18  | 101.92  | o |
| 4502 | 1 | -1  | 16 | 8 | 2318.43  | 3032.05  | 95.55   | o |
| 4503 | 1 | 0   | 16 | 8 | 29539.40 | 35712.60 | 1079.69 | o |
| 4504 | 1 | 1   | 16 | 8 | 2674.37  | 3395.13  | 105.10  | o |
| 4505 | 1 | 2   | 16 | 8 | 3407.21  | 3735.92  | 117.84  | o |
| 4506 | 1 | 3   | 16 | 8 | 1759.50  | 1748.53  | 66.88   | o |
| 4507 | 1 | 4   | 16 | 8 | 2314.69  | 2133.90  | 66.88   | o |
| 4508 | 1 | 5   | 16 | 8 | 150.94   | 152.88   | 9.55    | o |
| 4509 | 1 | 6   | 16 | 8 | 677.22   | 563.73   | 85.99   | o |
| 4510 | 1 | 7   | 16 | 8 | 525.04   | 506.40   | 22.29   | o |
| 4511 | 1 | 8   | 16 | 8 | 972.69   | 828.08   | 76.44   | o |
| 4512 | 1 | 9   | 16 | 8 | 425.72   | 414.04   | 19.11   | o |
| 4513 | 1 | 10  | 16 | 8 | 2827.27  | 2159.38  | 146.51  | o |
| 4514 | 1 | -10 | 17 | 8 | 77.43    | 89.18    | 9.55    | o |
| 4515 | 1 | -9  | 17 | 8 | 2.20     | 6.37     | 3.18    | < |
| 4516 | 1 | -8  | 17 | 8 | 200.69   | 187.91   | 54.14   | o |
| 4517 | 1 | -7  | 17 | 8 | 48.64    | 28.66    | 82.81   | < |
| 4518 | 1 | -6  | 17 | 8 | 76.82    | 76.44    | 6.37    | o |
| 4519 | 1 | -5  | 17 | 8 | 184.53   | 181.54   | 12.74   | o |
| 4520 | 1 | -4  | 17 | 8 | 341.32   | 286.64   | 12.74   | o |
| 4521 | 1 | -3  | 17 | 8 | 101.14   | 114.66   | 9.55    | o |
| 4522 | 1 | -2  | 17 | 8 | 330.78   | 286.64   | 12.74   | o |
| 4523 | 1 | -1  | 17 | 8 | 110.68   | 98.73    | 6.37    | o |
| 4524 | 1 | 0   | 17 | 8 | 0.16     | 0.00     | 35.03   | < |
| 4525 | 1 | 1   | 17 | 8 | 38.85    | 47.77    | 6.37    | o |
| 4526 | 1 | 2   | 17 | 8 | 204.60   | 235.68   | 12.74   | o |
| 4527 | 1 | 3   | 17 | 8 | 414.79   | 359.90   | 15.92   | o |
| 4528 | 1 | 4   | 17 | 8 | 209.30   | 222.95   | 12.74   | o |
| 4529 | 1 | 5   | 17 | 8 | 161.04   | 165.62   | 9.55    | o |
| 4530 | 1 | 6   | 17 | 8 | 2.16     | 9.55     | 50.96   | < |
| 4531 | 1 | 7   | 17 | 8 | 200.75   | 187.91   | 9.55    | o |
| 4532 | 1 | 8   | 17 | 8 | 369.86   | 356.71   | 15.92   | o |
| 4533 | 1 | 9   | 17 | 8 | 62.81    | 60.51    | 6.37    | o |
| 4534 | 1 | -10 | 18 | 8 | 892.21   | 780.31   | 57.33   | o |
| 4535 | 1 | -9  | 18 | 8 | 156.85   | 156.06   | 12.74   | o |
| 4536 | 1 | -8  | 18 | 8 | 403.46   | 379.01   | 19.11   | o |
| 4537 | 1 | -7  | 18 | 8 | 0.09     | 3.18     | 9.55    | < |
| 4538 | 1 | -5  | 18 | 8 | 42.37    | 25.48    | 19.11   | < |
| 4539 | 1 | -4  | 18 | 8 | 1979.67  | 1570.17  | 50.96   | o |
| 4540 | 1 | -2  | 18 | 8 | 3780.22  | 4455.71  | 140.14  | o |
| 4541 | 1 | -1  | 18 | 8 | 271.26   | 328.05   | 12.74   | o |
| 4542 | 1 | 0   | 18 | 8 | 3417.36  | 3748.66  | 117.84  | o |
| 4543 | 1 | 1   | 18 | 8 | 120.44   | 181.54   | 9.55    | o |
| 4544 | 1 | 2   | 18 | 8 | 4393.44  | 4930.27  | 152.88  | o |
| 4545 | 1 | 4   | 18 | 8 | 1332.49  | 1248.49  | 41.40   | o |
| 4546 | 1 | 5   | 18 | 8 | 69.12    | 63.70    | 6.37    | o |
| 4547 | 1 | 6   | 18 | 8 | 291.15   | 219.76   | 12.74   | o |
| 4548 | 1 | 7   | 18 | 8 | 109.42   | 124.21   | 9.55    | o |
| 4549 | 1 | 8   | 18 | 8 | 413.12   | 363.08   | 15.92   | o |
| 4550 | 1 | 9   | 18 | 8 | 1.65     | 35.03    | 12.74   | < |
| 4551 | 1 | -9  | 19 | 8 | 2.92     | 3.18     | 3.18    | < |
| 4552 | 1 | -8  | 19 | 8 | 89.90    | 105.10   | 9.55    | o |
| 4553 | 1 | -7  | 19 | 8 | 57.60    | 50.96    | 22.29   | < |
| 4554 | 1 | -6  | 19 | 8 | 240.05   | 232.50   | 12.74   | o |
| 4555 | 1 | -5  | 19 | 8 | 333.37   | 286.64   | 12.74   | o |
| 4556 | 1 | -4  | 19 | 8 | 18.92    | 25.48    | 6.37    | o |
| 4557 | 1 | -3  | 19 | 8 | 203.96   | 264.35   | 15.92   | o |

|      |   |    |    |   |         |         |        |   |
|------|---|----|----|---|---------|---------|--------|---|
| 4558 | 1 | -2 | 19 | 8 | 978.68  | 850.38  | 31.85  | o |
| 4559 | 1 | -1 | 19 | 8 | 156.39  | 171.99  | 9.55   | o |
| 4560 | 1 | 0  | 19 | 8 | 30.96   | 47.77   | 6.37   | o |
| 4561 | 1 | 1  | 19 | 8 | 23.57   | 63.70   | 6.37   | o |
| 4562 | 1 | 2  | 19 | 8 | 384.28  | 503.22  | 19.11  | o |
| 4563 | 1 | 3  | 19 | 8 | 1179.88 | 1114.72 | 44.59  | o |
| 4564 | 1 | 4  | 19 | 8 | 134.07  | 133.77  | 9.55   | o |
| 4565 | 1 | 5  | 19 | 8 | 118.98  | 108.29  | 9.55   | o |
| 4566 | 1 | 6  | 19 | 8 | 284.78  | 270.72  | 15.92  | o |
| 4567 | 1 | 7  | 19 | 8 | 248.99  | 248.42  | 15.92  | o |
| 4568 | 1 | 8  | 19 | 8 | 20.65   | 25.48   | 6.37   | o |
| 4569 | 1 | -8 | 20 | 8 | 1557.24 | 1474.62 | 98.73  | o |
| 4570 | 1 | -6 | 20 | 8 | 6963.73 | 5959.00 | 184.73 | o |
| 4571 | 1 | -5 | 20 | 8 | 208.74  | 187.91  | 9.55   | o |
| 4572 | 1 | -4 | 20 | 8 | 532.63  | 404.49  | 15.92  | o |
| 4573 | 1 | -2 | 20 | 8 | 3014.70 | 3133.97 | 98.73  | o |
| 4574 | 1 | 0  | 20 | 8 | 810.04  | 799.42  | 28.66  | o |
| 4575 | 1 | 2  | 20 | 8 | 3512.74 | 3331.43 | 105.10 | o |
| 4576 | 1 | 3  | 20 | 8 | 120.97  | 133.77  | 9.55   | o |
| 4577 | 1 | 4  | 20 | 8 | 521.63  | 404.49  | 15.92  | o |
| 4578 | 1 | 5  | 20 | 8 | 48.50   | 79.62   | 6.37   | o |
| 4579 | 1 | 6  | 20 | 8 | 7142.48 | 6927.22 | 229.32 | o |
| 4580 | 1 | 7  | 20 | 8 | 42.81   | 92.36   | 12.74  | o |
| 4581 | 1 | 8  | 20 | 8 | 998.70  | 566.92  | 117.84 | o |
| 4582 | 1 | -7 | 21 | 8 | 35.60   | 44.59   | 9.55   | o |
| 4583 | 1 | -6 | 21 | 8 | 131.74  | 121.03  | 9.55   | o |
| 4584 | 1 | -5 | 21 | 8 | 155.71  | 124.21  | 9.55   | o |
| 4585 | 1 | -4 | 21 | 8 | 19.86   | 28.66   | 3.18   | o |
| 4586 | 1 | -3 | 21 | 8 | 18.62   | 31.85   | 6.37   | o |
| 4587 | 1 | -1 | 21 | 8 | 332.80  | 308.94  | 15.92  | o |
| 4588 | 1 | 1  | 21 | 8 | 527.47  | 474.55  | 19.11  | o |
| 4589 | 1 | 2  | 21 | 8 | 80.80   | 70.07   | 6.37   | o |
| 4590 | 1 | 3  | 21 | 8 | 84.47   | 54.14   | 6.37   | o |
| 4591 | 1 | 4  | 21 | 8 | 17.34   | 35.03   | 3.18   | o |
| 4592 | 1 | 5  | 21 | 8 | 106.47  | 85.99   | 6.37   | o |
| 4593 | 1 | 6  | 21 | 8 | 12.80   | 22.29   | 9.55   | < |
| 4594 | 1 | 7  | 21 | 8 | 90.91   | 79.62   | 9.55   | o |
| 4595 | 1 | 8  | 21 | 8 | 14.72   | 22.29   | 6.37   | o |
| 4596 | 1 | -6 | 22 | 8 | 491.50  | 299.38  | 31.85  | o |
| 4597 | 1 | -5 | 22 | 8 | 234.94  | 181.54  | 12.74  | o |
| 4598 | 1 | -2 | 22 | 8 | 748.21  | 598.77  | 22.29  | o |
| 4599 | 1 | -1 | 22 | 8 | 6.50    | 12.74   | 3.18   | o |
| 4600 | 1 | 0  | 22 | 8 | 3619.47 | 3856.95 | 121.03 | o |
| 4601 | 1 | 1  | 22 | 8 | 27.55   | 25.48   | 3.18   | o |
| 4602 | 1 | 2  | 22 | 8 | 797.10  | 672.02  | 25.48  | o |
| 4603 | 1 | 3  | 22 | 8 | 97.44   | 159.25  | 9.55   | o |
| 4604 | 1 | 4  | 22 | 8 | 1663.94 | 1283.53 | 50.96  | o |
| 4605 | 1 | 5  | 22 | 8 | 259.35  | 194.28  | 15.92  | o |
| 4606 | 1 | 6  | 22 | 8 | 353.48  | 267.53  | 19.11  | o |
| 4607 | 1 | 7  | 22 | 8 | 182.31  | 149.69  | 12.74  | o |
| 4608 | 1 | -6 | 23 | 8 | 29.20   | 31.85   | 6.37   | o |
| 4609 | 1 | -5 | 23 | 8 | 145.59  | 108.29  | 12.74  | o |
| 4610 | 1 | -4 | 23 | 8 | 42.36   | 47.77   | 6.37   | o |
| 4611 | 1 | -3 | 23 | 8 | 278.88  | 229.32  | 12.74  | o |
| 4612 | 1 | -2 | 23 | 8 | 441.90  | 379.01  | 19.11  | o |
| 4613 | 1 | -1 | 23 | 8 | 191.22  | 162.43  | 9.55   | o |
| 4614 | 1 | 0  | 23 | 8 | 0.85    | 9.55    | 3.18   | o |
| 4615 | 1 | 2  | 23 | 8 | 391.84  | 340.79  | 15.92  | o |

|      |   |     |    |   |          |          |        |   |
|------|---|-----|----|---|----------|----------|--------|---|
| 4616 | 1 | 3   | 23 | 8 | 73.31    | 95.55    | 9.55   | o |
| 4617 | 1 | 4   | 23 | 8 | 11.52    | 35.03    | 6.37   | o |
| 4618 | 1 | 5   | 23 | 8 | 618.73   | 509.59   | 28.66  | o |
| 4619 | 1 | 6   | 23 | 8 | 38.47    | 54.14    | 6.37   | o |
| 4620 | 1 | 7   | 23 | 8 | 94.69    | 105.10   | 12.74  | o |
| 4621 | 1 | -4  | 24 | 8 | 1042.96  | 808.97   | 44.59  | o |
| 4622 | 1 | -2  | 24 | 8 | 123.14   | 95.55    | 9.55   | o |
| 4623 | 1 | -1  | 24 | 8 | 21.56    | 25.48    | 6.37   | o |
| 4624 | 1 | 0   | 24 | 8 | 4211.01  | 4369.72  | 194.28 | o |
| 4625 | 1 | 1   | 24 | 8 | 17.98    | 28.66    | 6.37   | o |
| 4626 | 1 | 2   | 24 | 8 | 35.96    | 50.96    | 9.55   | o |
| 4627 | 1 | 3   | 24 | 8 | 49.32    | 82.81    | 12.74  | o |
| 4628 | 1 | 4   | 24 | 8 | 1394.53  | 1194.35  | 82.81  | o |
| 4629 | 1 | 5   | 24 | 8 | 102.64   | 226.13   | 22.29  | o |
| 4630 | 1 | -5  | 25 | 8 | 265.13   | 210.21   | 19.11  | o |
| 4631 | 1 | -4  | 25 | 8 | 408.14   | 293.01   | 22.29  | o |
| 4632 | 1 | -3  | 25 | 8 | 36.98    | 38.22    | 9.55   | o |
| 4633 | 1 | -2  | 25 | 8 | 340.24   | 251.61   | 25.48  | o |
| 4634 | 1 | -1  | 25 | 8 | 7.02     | 92.36    | 25.48  | o |
| 4635 | 1 | -11 | 1  | 9 | 763.88   | 789.86   | 28.66  | o |
| 4636 | 1 | -10 | 1  | 9 | 1949.34  | 2041.54  | 76.44  | o |
| 4637 | 1 | -9  | 1  | 9 | 48.39    | 63.70    | 6.37   | o |
| 4638 | 1 | -8  | 1  | 9 | 676.85   | 636.98   | 25.48  | o |
| 4639 | 1 | -7  | 1  | 9 | 1509.13  | 1614.76  | 60.51  | o |
| 4640 | 1 | -6  | 1  | 9 | 991.12   | 971.40   | 31.85  | o |
| 4641 | 1 | -5  | 1  | 9 | 1908.33  | 2044.72  | 66.88  | o |
| 4642 | 1 | -4  | 1  | 9 | 13432.40 | 13596.50 | 410.86 | o |
| 4643 | 1 | -2  | 1  | 9 | 9216.12  | 9471.97  | 286.64 | o |
| 4644 | 1 | 0   | 1  | 9 | 134.10   | 130.58   | 6.37   | o |
| 4645 | 1 | 1   | 1  | 9 | 868.99   | 1235.75  | 47.77  | o |
| 4646 | 1 | 2   | 1  | 9 | 11788.50 | 10975.30 | 334.42 | o |
| 4647 | 1 | 4   | 1  | 9 | 9796.24  | 8255.33  | 251.61 | o |
| 4648 | 1 | 5   | 1  | 9 | 1249.68  | 1187.98  | 41.40  | o |
| 4649 | 1 | 6   | 1  | 9 | 534.56   | 433.15   | 114.66 | o |
| 4650 | 1 | 7   | 1  | 9 | 1643.65  | 1882.29  | 70.07  | o |
| 4651 | 1 | 8   | 1  | 9 | 1358.50  | 1468.25  | 47.77  | o |
| 4652 | 1 | 9   | 1  | 9 | 71.52    | 79.62    | 9.55   | o |
| 4653 | 1 | 10  | 1  | 9 | 2381.20  | 2745.41  | 92.36  | o |
| 4654 | 1 | 11  | 1  | 9 | 702.25   | 780.31   | 28.66  | o |
| 4655 | 1 | 12  | 1  | 9 | 707.31   | 560.55   | 54.14  | o |
| 4656 | 1 | -11 | 2  | 9 | 29.73    | 35.03    | 6.37   | o |
| 4657 | 1 | -10 | 2  | 9 | 345.23   | 359.90   | 15.92  | o |
| 4658 | 1 | -9  | 2  | 9 | 4.36     | 6.37     | 3.18   | < |
| 4659 | 1 | -8  | 2  | 9 | 5.62     | 0.00     | 19.11  | < |
| 4660 | 1 | -7  | 2  | 9 | 140.60   | 146.51   | 9.55   | o |
| 4661 | 1 | -6  | 2  | 9 | 51.44    | 70.07    | 6.37   | o |
| 4662 | 1 | -5  | 2  | 9 | 227.74   | 229.32   | 9.55   | o |
| 4663 | 1 | -4  | 2  | 9 | 512.19   | 541.44   | 19.11  | o |
| 4664 | 1 | -3  | 2  | 9 | 1661.63  | 1805.85  | 57.33  | o |
| 4665 | 1 | -1  | 2  | 9 | 102.00   | 76.44    | 6.37   | o |
| 4666 | 1 | 0   | 2  | 9 | 8.24     | 12.74    | 3.18   | o |
| 4667 | 1 | 1   | 2  | 9 | 1.96     | 6.37     | 3.18   | < |
| 4668 | 1 | 2   | 2  | 9 | 276.88   | 238.87   | 9.55   | o |
| 4669 | 1 | 3   | 2  | 9 | 1571.64  | 1442.77  | 47.77  | o |
| 4670 | 1 | 4   | 2  | 9 | 289.63   | 245.24   | 12.74  | o |
| 4671 | 1 | 5   | 2  | 9 | 314.30   | 277.09   | 12.74  | o |
| 4672 | 1 | 6   | 2  | 9 | 26.27    | 28.66    | 3.18   | o |
| 4673 | 1 | 7   | 2  | 9 | 151.80   | 159.25   | 9.55   | o |

|      |   |     |   |   |         |         |        |   |
|------|---|-----|---|---|---------|---------|--------|---|
| 4674 | 1 | 8   | 2 | 9 | 432.94  | 442.70  | 22.29  | o |
| 4675 | 1 | 9   | 2 | 9 | 3.66    | 15.92   | 3.18   | o |
| 4676 | 1 | 10  | 2 | 9 | 42.77   | 70.07   | 6.37   | o |
| 4677 | 1 | 11  | 2 | 9 | 85.43   | 111.47  | 9.55   | o |
| 4678 | 1 | 12  | 2 | 9 | 14.09   | 15.92   | 3.18   | o |
| 4679 | 1 | -11 | 3 | 9 | 60.30   | 117.84  | 9.55   | o |
| 4680 | 1 | -10 | 3 | 9 | 1.13    | 6.37    | 3.18   | < |
| 4681 | 1 | -9  | 3 | 9 | 513.65  | 452.26  | 19.11  | o |
| 4682 | 1 | -8  | 3 | 9 | 1761.26 | 1777.19 | 57.33  | o |
| 4683 | 1 | -6  | 3 | 9 | 30.62   | 41.40   | 3.18   | o |
| 4684 | 1 | -5  | 3 | 9 | 2212.66 | 2602.09 | 82.81  | o |
| 4685 | 1 | -4  | 3 | 9 | 1763.99 | 1869.55 | 60.51  | o |
| 4686 | 1 | -3  | 3 | 9 | 10.58   | 25.48   | 3.18   | o |
| 4687 | 1 | -2  | 3 | 9 | 253.32  | 264.35  | 12.74  | o |
| 4688 | 1 | -1  | 3 | 9 | 449.32  | 570.10  | 19.11  | o |
| 4689 | 1 | 0   | 3 | 9 | 607.13  | 678.39  | 22.29  | o |
| 4690 | 1 | 1   | 3 | 9 | 463.74  | 522.33  | 19.11  | o |
| 4691 | 1 | 2   | 3 | 9 | 142.83  | 121.03  | 6.37   | o |
| 4692 | 1 | 4   | 3 | 9 | 763.14  | 621.06  | 22.29  | o |
| 4693 | 1 | 5   | 3 | 9 | 2187.66 | 2210.34 | 82.81  | o |
| 4694 | 1 | 6   | 3 | 9 | 52.68   | 35.03   | 3.18   | o |
| 4695 | 1 | 8   | 3 | 9 | 2349.57 | 2875.99 | 105.10 | o |
| 4696 | 1 | 9   | 3 | 9 | 482.41  | 506.40  | 19.11  | o |
| 4697 | 1 | 10  | 3 | 9 | 4.97    | 9.55    | 3.18   | o |
| 4698 | 1 | 12  | 3 | 9 | 264.49  | 251.61  | 19.11  | o |
| 4699 | 1 | -11 | 4 | 9 | 10.53   | 15.92   | 3.18   | o |
| 4700 | 1 | -10 | 4 | 9 | 16.66   | 9.55    | 3.18   | o |
| 4701 | 1 | -9  | 4 | 9 | 2.43    | 6.37    | 3.18   | < |
| 4702 | 1 | -8  | 4 | 9 | 0.42    | 3.18    | 3.18   | < |
| 4703 | 1 | -7  | 4 | 9 | 79.00   | 92.36   | 6.37   | o |
| 4704 | 1 | -6  | 4 | 9 | 98.30   | 92.36   | 6.37   | o |
| 4705 | 1 | -5  | 4 | 9 | 12.99   | 28.66   | 3.18   | o |
| 4706 | 1 | -4  | 4 | 9 | 11.40   | 6.37    | 19.11  | < |
| 4707 | 1 | -3  | 4 | 9 | 6.90    | 12.74   | 3.18   | o |
| 4708 | 1 | -2  | 4 | 9 | 181.63  | 168.80  | 9.55   | o |
| 4709 | 1 | -1  | 4 | 9 | 194.67  | 219.76  | 9.55   | o |
| 4710 | 1 | 0   | 4 | 9 | 671.68  | 566.92  | 19.11  | o |
| 4711 | 1 | 1   | 4 | 9 | 408.11  | 328.05  | 12.74  | o |
| 4712 | 1 | 2   | 4 | 9 | 95.13   | 66.88   | 6.37   | o |
| 4713 | 1 | 3   | 4 | 9 | 55.82   | 50.96   | 3.18   | o |
| 4714 | 1 | 4   | 4 | 9 | 391.94  | 394.93  | 15.92  | o |
| 4715 | 1 | 5   | 4 | 9 | 29.49   | 25.48   | 3.18   | o |
| 4716 | 1 | 6   | 4 | 9 | 1.66    | 9.55    | 6.37   | < |
| 4717 | 1 | 7   | 4 | 9 | 60.72   | 50.96   | 6.37   | o |
| 4718 | 1 | 8   | 4 | 9 | 2.66    | 3.18    | 3.18   | < |
| 4719 | 1 | 9   | 4 | 9 | 6.50    | 12.74   | 3.18   | o |
| 4720 | 1 | 10  | 4 | 9 | 144.11  | 168.80  | 12.74  | o |
| 4721 | 1 | 11  | 4 | 9 | 33.80   | 41.40   | 6.37   | o |
| 4722 | 1 | 12  | 4 | 9 | 36.70   | 38.22   | 6.37   | o |
| 4723 | 1 | -11 | 5 | 9 | 225.62  | 308.94  | 19.11  | o |
| 4724 | 1 | -10 | 5 | 9 | 243.91  | 229.32  | 9.55   | o |
| 4725 | 1 | -8  | 5 | 9 | 1939.61 | 2019.24 | 70.07  | o |
| 4726 | 1 | -7  | 5 | 9 | 2471.80 | 2745.41 | 85.99  | o |
| 4727 | 1 | -6  | 5 | 9 | 737.29  | 697.50  | 28.66  | o |
| 4728 | 1 | -5  | 5 | 9 | 2783.71 | 3000.20 | 92.36  | o |
| 4729 | 1 | -4  | 5 | 9 | 6494.70 | 6876.26 | 210.21 | o |
| 4730 | 1 | -2  | 5 | 9 | 4980.89 | 4821.98 | 149.69 | o |
| 4731 | 1 | -1  | 5 | 9 | 3360.88 | 3197.67 | 98.73  | o |



|      |   |     |   |   |          |          |        |   |
|------|---|-----|---|---|----------|----------|--------|---|
| 4732 | 1 | 1   | 5 | 9 | 3106.32  | 2920.58  | 92.36  | o |
| 4733 | 1 | 2   | 5 | 9 | 4507.24  | 4471.64  | 136.95 | o |
| 4734 | 1 | 3   | 5 | 9 | 163.23   | 162.43   | 9.55   | o |
| 4735 | 1 | 4   | 5 | 9 | 4548.56  | 4143.59  | 149.69 | o |
| 4736 | 1 | 5   | 5 | 9 | 2181.06  | 2114.79  | 66.88  | o |
| 4737 | 1 | 6   | 5 | 9 | 861.56   | 789.86   | 31.85  | o |
| 4738 | 1 | 7   | 5 | 9 | 1940.85  | 1955.55  | 89.18  | o |
| 4739 | 1 | 8   | 5 | 9 | 1847.66  | 1974.65  | 73.25  | o |
| 4740 | 1 | 9   | 5 | 9 | 11.67    | 44.59    | 6.37   | o |
| 4741 | 1 | 10  | 5 | 9 | 530.22   | 550.99   | 25.48  | o |
| 4742 | 1 | 11  | 5 | 9 | 181.49   | 248.42   | 15.92  | o |
| 4743 | 1 | 12  | 5 | 9 | 88.49    | 70.07    | 9.55   | o |
| 4744 | 1 | -11 | 6 | 9 | 36.59    | 31.85    | 6.37   | o |
| 4745 | 1 | -10 | 6 | 9 | 60.65    | 60.51    | 6.37   | o |
| 4746 | 1 | -9  | 6 | 9 | 6.65     | 9.55     | 3.18   | o |
| 4747 | 1 | -8  | 6 | 9 | 309.55   | 312.12   | 12.74  | o |
| 4748 | 1 | -7  | 6 | 9 | 0.21     | 12.74    | 3.18   | o |
| 4749 | 1 | -6  | 6 | 9 | 14.10    | 3.18     | 70.07  | < |
| 4750 | 1 | -5  | 6 | 9 | 16.29    | 15.92    | 3.18   | o |
| 4751 | 1 | -4  | 6 | 9 | 209.00   | 187.91   | 9.55   | o |
| 4752 | 1 | -2  | 6 | 9 | 6.08     | 6.37     | 3.18   | < |
| 4753 | 1 | -1  | 6 | 9 | 7.70     | 12.74    | 3.18   | o |
| 4754 | 1 | 0   | 6 | 9 | 71.75    | 63.70    | 6.37   | o |
| 4755 | 1 | 1   | 6 | 9 | 22.84    | 28.66    | 3.18   | o |
| 4756 | 1 | 2   | 6 | 9 | 31.22    | 35.03    | 3.18   | o |
| 4757 | 1 | 3   | 6 | 9 | 1.87     | 6.37     | 3.18   | < |
| 4758 | 1 | 4   | 6 | 9 | 1.84     | 3.18     | 12.74  | < |
| 4759 | 1 | 5   | 6 | 9 | 8.66     | 15.92    | 3.18   | o |
| 4760 | 1 | 6   | 6 | 9 | 445.00   | 452.26   | 25.48  | o |
| 4761 | 1 | 7   | 6 | 9 | 0.01     | 6.37     | 3.18   | < |
| 4762 | 1 | 8   | 6 | 9 | 3.70     | 0.00     | 12.74  | < |
| 4763 | 1 | 9   | 6 | 9 | 9.87     | 12.74    | 3.18   | o |
| 4764 | 1 | 10  | 6 | 9 | 3.92     | 3.18     | 3.18   | < |
| 4765 | 1 | 11  | 6 | 9 | 55.78    | 54.14    | 6.37   | o |
| 4766 | 1 | 12  | 6 | 9 | 36.82    | 35.03    | 6.37   | o |
| 4767 | 1 | -11 | 7 | 9 | 70.09    | 165.62   | 15.92  | o |
| 4768 | 1 | -10 | 7 | 9 | 165.98   | 159.25   | 9.55   | o |
| 4769 | 1 | -8  | 7 | 9 | 1384.90  | 1433.22  | 54.14  | o |
| 4770 | 1 | -7  | 7 | 9 | 2850.60  | 2875.99  | 105.10 | o |
| 4771 | 1 | -6  | 7 | 9 | 53.93    | 70.07    | 6.37   | o |
| 4772 | 1 | -5  | 7 | 9 | 1196.60  | 1273.97  | 41.40  | o |
| 4773 | 1 | -4  | 7 | 9 | 7911.91  | 8373.17  | 254.79 | o |
| 4774 | 1 | -3  | 7 | 9 | 1633.98  | 1796.30  | 57.33  | o |
| 4775 | 1 | -2  | 7 | 9 | 3079.23  | 2812.29  | 89.18  | o |
| 4776 | 1 | -1  | 7 | 9 | 2790.51  | 3146.71  | 98.73  | o |
| 4777 | 1 | 1   | 7 | 9 | 2640.36  | 2726.30  | 85.99  | o |
| 4778 | 1 | 2   | 7 | 9 | 879.91   | 818.53   | 31.85  | o |
| 4779 | 1 | 3   | 7 | 9 | 1054.10  | 1035.10  | 41.40  | o |
| 4780 | 1 | 4   | 7 | 9 | 11708.70 | 10889.30 | 331.23 | o |
| 4781 | 1 | 5   | 7 | 9 | 879.54   | 1044.66  | 50.96  | o |
| 4782 | 1 | 6   | 7 | 9 | 228.35   | 226.13   | 12.74  | o |
| 4783 | 1 | 7   | 7 | 9 | 2933.57  | 3032.05  | 95.55  | o |
| 4784 | 1 | 8   | 7 | 9 | 1495.92  | 1458.70  | 47.77  | o |
| 4785 | 1 | 9   | 7 | 9 | 62.05    | 70.07    | 9.55   | o |
| 4786 | 1 | 10  | 7 | 9 | 153.26   | 162.43   | 9.55   | o |
| 4787 | 1 | 11  | 7 | 9 | 57.38    | 101.92   | 12.74  | o |
| 4788 | 1 | 12  | 7 | 9 | 195.86   | 219.76   | 22.29  | o |
| 4789 | 1 | -11 | 8 | 9 | 41.02    | 50.96    | 12.74  | o |

|      |   |     |    |   |         |         |        |   |
|------|---|-----|----|---|---------|---------|--------|---|
| 4790 | 1 | -10 | 8  | 9 | 4.91    | 0.00    | 6.37   | < |
| 4791 | 1 | -9  | 8  | 9 | 33.96   | 25.48   | 6.37   | o |
| 4792 | 1 | -8  | 8  | 9 | 556.51  | 544.62  | 22.29  | o |
| 4793 | 1 | -7  | 8  | 9 | 18.46   | 28.66   | 6.37   | o |
| 4794 | 1 | -6  | 8  | 9 | 0.42    | -6.37   | 19.11  | < |
| 4795 | 1 | -5  | 8  | 9 | 224.04  | 191.10  | 9.55   | o |
| 4796 | 1 | -4  | 8  | 9 | 0.31    | 3.18    | 15.92  | < |
| 4797 | 1 | -3  | 8  | 9 | 2.23    | 6.37    | 3.18   | < |
| 4798 | 1 | -2  | 8  | 9 | 15.51   | 15.92   | 3.18   | o |
| 4799 | 1 | -1  | 8  | 9 | 286.53  | 270.72  | 12.74  | o |
| 4800 | 1 | 0   | 8  | 9 | 19.18   | 12.74   | 3.18   | o |
| 4801 | 1 | 1   | 8  | 9 | 398.88  | 369.45  | 15.92  | o |
| 4802 | 1 | 2   | 8  | 9 | 5.22    | 6.37    | 3.18   | < |
| 4803 | 1 | 3   | 8  | 9 | 1.70    | 12.74   | 9.55   | < |
| 4804 | 1 | 4   | 8  | 9 | 195.02  | 159.25  | 9.55   | o |
| 4805 | 1 | 5   | 8  | 9 | 260.68  | 213.39  | 12.74  | o |
| 4806 | 1 | 6   | 8  | 9 | 344.78  | 353.53  | 15.92  | o |
| 4807 | 1 | 7   | 8  | 9 | 17.24   | 28.66   | 3.18   | o |
| 4808 | 1 | 8   | 8  | 9 | 77.77   | 60.51   | 28.66  | < |
| 4809 | 1 | 9   | 8  | 9 | 97.86   | 108.29  | 9.55   | o |
| 4810 | 1 | 10  | 8  | 9 | 228.90  | 235.68  | 12.74  | o |
| 4811 | 1 | 11  | 8  | 9 | 16.52   | 15.92   | 3.18   | o |
| 4812 | 1 | 12  | 8  | 9 | 15.02   | 22.29   | 6.37   | o |
| 4813 | 1 | -10 | 9  | 9 | 68.47   | 76.44   | 6.37   | o |
| 4814 | 1 | -9  | 9  | 9 | 150.93  | 133.77  | 9.55   | o |
| 4815 | 1 | -8  | 9  | 9 | 26.35   | 31.85   | 3.18   | o |
| 4816 | 1 | -6  | 9  | 9 | 113.37  | 108.29  | 6.37   | o |
| 4817 | 1 | -5  | 9  | 9 | 924.72  | 965.03  | 35.03  | o |
| 4818 | 1 | -4  | 9  | 9 | 2003.25 | 1990.58 | 63.70  | o |
| 4819 | 1 | -3  | 9  | 9 | 73.63   | 76.44   | 6.37   | o |
| 4820 | 1 | -2  | 9  | 9 | 489.36  | 573.29  | 25.48  | o |
| 4821 | 1 | -1  | 9  | 9 | 2105.38 | 2538.39 | 92.36  | o |
| 4822 | 1 | 1   | 9  | 9 | 2180.75 | 2624.38 | 117.84 | o |
| 4823 | 1 | 3   | 9  | 9 | 52.17   | 60.51   | 6.37   | o |
| 4824 | 1 | 4   | 9  | 9 | 2221.39 | 2172.12 | 79.62  | o |
| 4825 | 1 | 5   | 9  | 9 | 838.20  | 955.48  | 35.03  | o |
| 4826 | 1 | 6   | 9  | 9 | 17.14   | 12.74   | 12.74  | < |
| 4827 | 1 | 8   | 9  | 9 | 25.28   | 35.03   | 6.37   | o |
| 4828 | 1 | 9   | 9  | 9 | 65.28   | 57.33   | 6.37   | o |
| 4829 | 1 | 10  | 9  | 9 | 133.54  | 149.69  | 9.55   | o |
| 4830 | 1 | 12  | 9  | 9 | 87.83   | 79.62   | 9.55   | o |
| 4831 | 1 | -11 | 10 | 9 | 14.67   | 15.92   | 6.37   | < |
| 4832 | 1 | -10 | 10 | 9 | 68.93   | 76.44   | 6.37   | o |
| 4833 | 1 | -9  | 10 | 9 | 141.59  | 149.69  | 9.55   | o |
| 4834 | 1 | -8  | 10 | 9 | 0.29    | 3.18    | 3.18   | < |
| 4835 | 1 | -7  | 10 | 9 | 97.98   | 92.36   | 6.37   | o |
| 4836 | 1 | -6  | 10 | 9 | 151.18  | 136.95  | 9.55   | o |
| 4837 | 1 | -5  | 10 | 9 | 106.64  | 95.55   | 9.55   | o |
| 4838 | 1 | -4  | 10 | 9 | 239.45  | 184.73  | 12.74  | o |
| 4839 | 1 | -3  | 10 | 9 | 252.50  | 264.35  | 12.74  | o |
| 4840 | 1 | -2  | 10 | 9 | 126.11  | 133.77  | 9.55   | o |
| 4841 | 1 | -1  | 10 | 9 | 18.92   | 12.74   | 3.18   | o |
| 4842 | 1 | 0   | 10 | 9 | 271.09  | 270.72  | 12.74  | o |
| 4843 | 1 | 1   | 10 | 9 | 0.70    | 3.18    | 3.18   | < |
| 4844 | 1 | 2   | 10 | 9 | 344.20  | 308.94  | 12.74  | o |
| 4845 | 1 | 3   | 10 | 9 | 263.23  | 267.53  | 15.92  | o |
| 4846 | 1 | 4   | 10 | 9 | 873.35  | 910.89  | 31.85  | o |
| 4847 | 1 | 5   | 10 | 9 | 233.11  | 197.46  | 9.55   | o |

|      |   |     |    |   |         |         |        |   |
|------|---|-----|----|---|---------|---------|--------|---|
| 4848 | 1 | 6   | 10 | 9 | 0.21    | -3.18   | 31.85  | < |
| 4849 | 1 | 7   | 10 | 9 | 30.96   | 22.29   | 12.74  | < |
| 4850 | 1 | 8   | 10 | 9 | 21.23   | 25.48   | 3.18   | o |
| 4851 | 1 | 9   | 10 | 9 | 202.88  | 203.84  | 12.74  | o |
| 4852 | 1 | 10  | 10 | 9 | 0.49    | 0.00    | 3.18   | < |
| 4853 | 1 | 11  | 10 | 9 | 18.73   | 22.29   | 6.37   | o |
| 4854 | 1 | 12  | 10 | 9 | 18.08   | 22.29   | 6.37   | o |
| 4855 | 1 | -10 | 11 | 9 | 1043.12 | 1041.47 | 50.96  | o |
| 4856 | 1 | -9  | 11 | 9 | 400.52  | 423.60  | 19.11  | o |
| 4857 | 1 | -8  | 11 | 9 | 2486.54 | 1974.65 | 70.07  | o |
| 4858 | 1 | -7  | 11 | 9 | 32.70   | 31.85   | 3.18   | o |
| 4859 | 1 | -6  | 11 | 9 | 41.01   | 50.96   | 6.37   | o |
| 4860 | 1 | -5  | 11 | 9 | 131.68  | 194.28  | 9.55   | o |
| 4861 | 1 | -4  | 11 | 9 | 441.87  | 343.97  | 19.11  | o |
| 4862 | 1 | -3  | 11 | 9 | 1070.23 | 926.81  | 38.22  | o |
| 4863 | 1 | -2  | 11 | 9 | 5374.50 | 5372.97 | 235.68 | o |
| 4864 | 1 | -1  | 11 | 9 | 3754.85 | 5344.31 | 235.68 | o |
| 4865 | 1 | 0   | 11 | 9 | 39.79   | 76.44   | 6.37   | o |
| 4866 | 1 | 1   | 11 | 9 | 4340.95 | 4997.15 | 156.06 | o |
| 4867 | 1 | 2   | 11 | 9 | 2920.17 | 2812.29 | 111.47 | o |
| 4868 | 1 | 3   | 11 | 9 | 755.17  | 761.20  | 31.85  | o |
| 4869 | 1 | 4   | 11 | 9 | 1550.14 | 1340.85 | 50.96  | o |
| 4870 | 1 | 5   | 11 | 9 | 442.04  | 439.52  | 22.29  | o |
| 4871 | 1 | 6   | 11 | 9 | 206.72  | 216.57  | 9.55   | o |
| 4872 | 1 | 7   | 11 | 9 | 127.91  | 133.77  | 9.55   | o |
| 4873 | 1 | 8   | 11 | 9 | 2469.78 | 2544.76 | 82.81  | o |
| 4874 | 1 | 9   | 11 | 9 | 406.97  | 401.30  | 19.11  | o |
| 4875 | 1 | 10  | 11 | 9 | 910.48  | 786.68  | 35.03  | o |
| 4876 | 1 | 11  | 11 | 9 | 47.18   | 117.84  | 12.74  | o |
| 4877 | 1 | 12  | 11 | 9 | 94.52   | 89.18   | 9.55   | o |
| 4878 | 1 | -11 | 12 | 9 | 108.43  | 152.88  | 15.92  | o |
| 4879 | 1 | -10 | 12 | 9 | 50.80   | 60.51   | 9.55   | o |
| 4880 | 1 | -9  | 12 | 9 | 17.14   | 19.11   | 3.18   | o |
| 4881 | 1 | -8  | 12 | 9 | 32.46   | 41.40   | 6.37   | o |
| 4882 | 1 | -6  | 12 | 9 | 1281.58 | 1175.24 | 47.77  | o |
| 4883 | 1 | -4  | 12 | 9 | 356.34  | 283.46  | 12.74  | o |
| 4884 | 1 | -3  | 12 | 9 | 284.89  | 197.46  | 12.74  | o |
| 4885 | 1 | -2  | 12 | 9 | 33.14   | 31.85   | 3.18   | o |
| 4886 | 1 | -1  | 12 | 9 | 165.78  | 143.32  | 9.55   | o |
| 4887 | 1 | 0   | 12 | 9 | 15.43   | 9.55    | 3.18   | o |
| 4888 | 1 | 1   | 12 | 9 | 117.57  | 108.29  | 6.37   | o |
| 4889 | 1 | 2   | 12 | 9 | 20.91   | 25.48   | 3.18   | o |
| 4890 | 1 | 3   | 12 | 9 | 183.99  | 162.43  | 9.55   | o |
| 4891 | 1 | 4   | 12 | 9 | 876.34  | 834.45  | 28.66  | o |
| 4892 | 1 | 5   | 12 | 9 | 15.30   | 44.59   | 6.37   | o |
| 4893 | 1 | 6   | 12 | 9 | 245.49  | 187.91  | 22.29  | o |
| 4894 | 1 | 7   | 12 | 9 | 24.51   | 47.77   | 6.37   | o |
| 4895 | 1 | 8   | 12 | 9 | 34.61   | 31.85   | 3.18   | o |
| 4896 | 1 | 9   | 12 | 9 | 48.24   | 60.51   | 6.37   | o |
| 4897 | 1 | 10  | 12 | 9 | 36.95   | 41.40   | 6.37   | o |
| 4898 | 1 | 11  | 12 | 9 | 69.51   | 79.62   | 9.55   | o |
| 4899 | 1 | 12  | 12 | 9 | 2.67    | 6.37    | 6.37   | < |
| 4900 | 1 | -11 | 13 | 9 | 573.83  | 487.29  | 44.59  | o |
| 4901 | 1 | -10 | 13 | 9 | 444.50  | 388.56  | 28.66  | o |
| 4902 | 1 | -9  | 13 | 9 | 28.42   | 31.85   | 3.18   | o |
| 4903 | 1 | -8  | 13 | 9 | 64.78   | 95.55   | 9.55   | o |
| 4904 | 1 | -7  | 13 | 9 | 444.65  | 359.90  | 19.11  | o |
| 4905 | 1 | -6  | 13 | 9 | 602.26  | 589.21  | 22.29  | o |

|      |   |     |    |   |         |         |        |   |
|------|---|-----|----|---|---------|---------|--------|---|
| 4906 | 1 | -5  | 13 | 9 | 857.34  | 652.91  | 28.66  | o |
| 4907 | 1 | -4  | 13 | 9 | 3403.57 | 2891.91 | 98.73  | o |
| 4908 | 1 | -2  | 13 | 9 | 4295.21 | 4837.90 | 149.69 | o |
| 4909 | 1 | 2   | 13 | 9 | 6494.40 | 6672.42 | 203.84 | o |
| 4910 | 1 | 4   | 13 | 9 | 1111.23 | 894.97  | 35.03  | o |
| 4911 | 1 | 5   | 13 | 9 | 747.91  | 770.75  | 28.66  | o |
| 4912 | 1 | 6   | 13 | 9 | 107.63  | 79.62   | 12.74  | o |
| 4913 | 1 | 7   | 13 | 9 | 441.40  | 433.15  | 19.11  | o |
| 4914 | 1 | 8   | 13 | 9 | 2.56    | 63.70   | 19.11  | o |
| 4915 | 1 | 9   | 13 | 9 | 75.51   | 89.18   | 9.55   | o |
| 4916 | 1 | 10  | 13 | 9 | 754.03  | 649.72  | 44.59  | o |
| 4917 | 1 | 11  | 13 | 9 | 448.51  | 394.93  | 35.03  | o |
| 4918 | 1 | -10 | 14 | 9 | 215.49  | 235.68  | 19.11  | o |
| 4919 | 1 | -9  | 14 | 9 | 76.12   | 79.62   | 6.37   | o |
| 4920 | 1 | -8  | 14 | 9 | 168.77  | 162.43  | 19.11  | o |
| 4921 | 1 | -7  | 14 | 9 | 0.24    | 3.18    | 3.18   | < |
| 4922 | 1 | -6  | 14 | 9 | 116.65  | 92.36   | 6.37   | o |
| 4923 | 1 | -5  | 14 | 9 | 2.29    | 6.37    | 3.18   | < |
| 4924 | 1 | -4  | 14 | 9 | 130.21  | 127.40  | 6.37   | o |
| 4925 | 1 | -3  | 14 | 9 | 544.27  | 496.85  | 22.29  | o |
| 4926 | 1 | -2  | 14 | 9 | 34.88   | 57.33   | 6.37   | o |
| 4927 | 1 | -1  | 14 | 9 | 189.11  | 162.43  | 9.55   | o |
| 4928 | 1 | 0   | 14 | 9 | 122.18  | 105.10  | 6.37   | o |
| 4929 | 1 | 1   | 14 | 9 | 135.98  | 114.66  | 6.37   | o |
| 4930 | 1 | 2   | 14 | 9 | 129.13  | 121.03  | 6.37   | o |
| 4931 | 1 | 3   | 14 | 9 | 861.61  | 853.56  | 35.03  | o |
| 4932 | 1 | 4   | 14 | 9 | 33.87   | 38.22   | 6.37   | o |
| 4933 | 1 | 5   | 14 | 9 | 11.41   | 22.29   | 3.18   | o |
| 4934 | 1 | 6   | 14 | 9 | 10.99   | 9.55    | 6.37   | < |
| 4935 | 1 | 7   | 14 | 9 | 0.22    | 3.18    | 3.18   | < |
| 4936 | 1 | 8   | 14 | 9 | 603.84  | 598.77  | 25.48  | o |
| 4937 | 1 | 9   | 14 | 9 | 117.20  | 152.88  | 9.55   | o |
| 4938 | 1 | 10  | 14 | 9 | 187.63  | 178.36  | 38.22  | o |
| 4939 | 1 | -10 | 15 | 9 | 0.76    | 19.11   | 6.37   | o |
| 4940 | 1 | -9  | 15 | 9 | 53.21   | 73.25   | 9.55   | o |
| 4941 | 1 | -8  | 15 | 9 | 3802.56 | 2939.69 | 133.77 | o |
| 4942 | 1 | -7  | 15 | 9 | 2614.55 | 2156.20 | 82.81  | o |
| 4943 | 1 | -6  | 15 | 9 | 14.16   | 22.29   | 22.29  | < |
| 4944 | 1 | -5  | 15 | 9 | 424.52  | 449.08  | 22.29  | o |
| 4945 | 1 | -3  | 15 | 9 | 70.27   | 98.73   | 6.37   | o |
| 4946 | 1 | -2  | 15 | 9 | 2417.21 | 2178.49 | 70.07  | o |
| 4947 | 1 | -1  | 15 | 9 | 132.50  | 121.03  | 9.55   | o |
| 4948 | 1 | 2   | 15 | 9 | 1084.90 | 1229.38 | 41.40  | o |
| 4949 | 1 | 3   | 15 | 9 | 32.76   | 54.14   | 6.37   | o |
| 4950 | 1 | 4   | 15 | 9 | 140.20  | 133.77  | 9.55   | o |
| 4951 | 1 | 5   | 15 | 9 | 418.54  | 490.48  | 22.29  | o |
| 4952 | 1 | 6   | 15 | 9 | 358.10  | 324.86  | 22.29  | o |
| 4953 | 1 | 7   | 15 | 9 | 3025.51 | 3089.38 | 165.62 | o |
| 4954 | 1 | 8   | 15 | 9 | 3655.73 | 3872.87 | 130.58 | o |
| 4955 | 1 | 9   | 15 | 9 | 11.20   | 35.03   | 6.37   | o |
| 4956 | 1 | 10  | 15 | 9 | 1.56    | 19.11   | 9.55   | < |
| 4957 | 1 | -10 | 16 | 9 | 66.46   | 60.51   | 9.55   | o |
| 4958 | 1 | -9  | 16 | 9 | 5.37    | 12.74   | 6.37   | < |
| 4959 | 1 | -8  | 16 | 9 | 180.11  | 171.99  | 9.55   | o |
| 4960 | 1 | -7  | 16 | 9 | 5.47    | 6.37    | 3.18   | < |
| 4961 | 1 | -6  | 16 | 9 | 13.14   | 25.48   | 3.18   | o |
| 4962 | 1 | -5  | 16 | 9 | 98.57   | 76.44   | 6.37   | o |
| 4963 | 1 | -4  | 16 | 9 | 332.51  | 257.98  | 12.74  | o |

|      |   |     |    |   |         |         |       |   |
|------|---|-----|----|---|---------|---------|-------|---|
| 4964 | 1 | -3  | 16 | 9 | 3.09    | 12.74   | 3.18  | o |
| 4965 | 1 | -2  | 16 | 9 | 106.68  | 146.51  | 9.55  | o |
| 4966 | 1 | 0   | 16 | 9 | 1301.66 | 1442.77 | 47.77 | o |
| 4967 | 1 | 2   | 16 | 9 | 522.34  | 477.74  | 19.11 | o |
| 4968 | 1 | 3   | 16 | 9 | 30.59   | 25.48   | 3.18  | o |
| 4969 | 1 | 4   | 16 | 9 | 105.33  | 111.47  | 9.55  | o |
| 4970 | 1 | 5   | 16 | 9 | 40.65   | 44.59   | 6.37  | o |
| 4971 | 1 | 6   | 16 | 9 | 64.80   | 63.70   | 6.37  | o |
| 4972 | 1 | 7   | 16 | 9 | 0.52    | 3.18    | 3.18  | < |
| 4973 | 1 | 8   | 16 | 9 | 0.75    | 3.18    | 3.18  | < |
| 4974 | 1 | 9   | 16 | 9 | 36.51   | 44.59   | 6.37  | o |
| 4975 | 1 | -10 | 17 | 9 | 58.47   | 117.84  | 15.92 | o |
| 4976 | 1 | -9  | 17 | 9 | 55.17   | 47.77   | 6.37  | o |
| 4977 | 1 | -8  | 17 | 9 | 1628.53 | 1375.89 | 50.96 | o |
| 4978 | 1 | -7  | 17 | 9 | 444.16  | 500.03  | 22.29 | o |
| 4979 | 1 | -6  | 17 | 9 | 275.51  | 251.61  | 12.74 | o |
| 4980 | 1 | -4  | 17 | 9 | 436.16  | 449.08  | 19.11 | o |
| 4981 | 1 | -3  | 17 | 9 | 274.72  | 257.98  | 12.74 | o |
| 4982 | 1 | -1  | 17 | 9 | 36.75   | 70.07   | 6.37  | o |
| 4983 | 1 | 1   | 17 | 9 | 34.26   | 57.33   | 6.37  | o |
| 4984 | 1 | 2   | 17 | 9 | 363.77  | 293.01  | 15.92 | o |
| 4985 | 1 | 3   | 17 | 9 | 443.75  | 420.41  | 19.11 | o |
| 4986 | 1 | 4   | 17 | 9 | 18.08   | 66.88   | 22.29 | < |
| 4987 | 1 | 5   | 17 | 9 | 819.73  | 703.87  | 28.66 | o |
| 4988 | 1 | 6   | 17 | 9 | 42.53   | 19.11   | 15.92 | < |
| 4989 | 1 | 7   | 17 | 9 | 186.10  | 181.54  | 12.74 | o |
| 4990 | 1 | 8   | 17 | 9 | 1773.30 | 1723.05 | 85.99 | o |
| 4991 | 1 | 9   | 17 | 9 | 3.30    | 22.29   | 6.37  | o |
| 4992 | 1 | -9  | 18 | 9 | 0.13    | 25.48   | 6.37  | o |
| 4993 | 1 | -8  | 18 | 9 | 295.74  | 277.09  | 19.11 | o |
| 4994 | 1 | -7  | 18 | 9 | 3.19    | 15.92   | 3.18  | o |
| 4995 | 1 | -6  | 18 | 9 | 154.12  | 117.84  | 9.55  | o |
| 4996 | 1 | -5  | 18 | 9 | 27.09   | 25.48   | 3.18  | o |
| 4997 | 1 | -4  | 18 | 9 | 551.92  | 426.78  | 19.11 | o |
| 4998 | 1 | -3  | 18 | 9 | 81.54   | 133.77  | 9.55  | o |
| 4999 | 1 | -2  | 18 | 9 | 116.11  | 146.51  | 9.55  | o |
| 5000 | 1 | -1  | 18 | 9 | 159.59  | 127.40  | 9.55  | o |
| 5001 | 1 | 0   | 18 | 9 | 18.09   | 19.11   | 3.18  | o |
| 5002 | 1 | 1   | 18 | 9 | 127.20  | 108.29  | 9.55  | o |
| 5003 | 1 | 2   | 18 | 9 | 509.27  | 445.89  | 19.11 | o |
| 5004 | 1 | 3   | 18 | 9 | 137.66  | 175.17  | 12.74 | o |
| 5005 | 1 | 4   | 18 | 9 | 159.87  | 140.14  | 12.74 | o |
| 5006 | 1 | 5   | 18 | 9 | 11.76   | 22.29   | 3.18  | o |
| 5007 | 1 | 6   | 18 | 9 | 361.14  | 308.94  | 12.74 | o |
| 5008 | 1 | 7   | 18 | 9 | 12.83   | 19.11   | 6.37  | o |
| 5009 | 1 | 8   | 18 | 9 | 25.01   | 12.74   | 44.59 | < |
| 5010 | 1 | 9   | 18 | 9 | 2.31    | 12.74   | 9.55  | < |
| 5011 | 1 | -8  | 19 | 9 | 70.03   | 79.62   | 12.74 | o |
| 5012 | 1 | -7  | 19 | 9 | 623.80  | 442.70  | 76.44 | o |
| 5013 | 1 | -6  | 19 | 9 | 259.14  | 264.35  | 12.74 | o |
| 5014 | 1 | -5  | 19 | 9 | 298.04  | 315.31  | 15.92 | o |
| 5015 | 1 | -4  | 19 | 9 | 444.07  | 286.64  | 79.62 | o |
| 5016 | 1 | -3  | 19 | 9 | 345.18  | 248.42  | 12.74 | o |
| 5017 | 1 | -2  | 19 | 9 | 162.43  | 175.17  | 9.55  | o |
| 5018 | 1 | -1  | 19 | 9 | 565.87  | 547.81  | 25.48 | o |
| 5019 | 1 | 1   | 19 | 9 | 692.75  | 608.32  | 31.85 | o |
| 5020 | 1 | 2   | 19 | 9 | 171.61  | 171.99  | 9.55  | o |
| 5021 | 1 | 3   | 19 | 9 | 218.52  | 178.36  | 12.74 | o |

|      |   |    |    |   |         |         |        |   |
|------|---|----|----|---|---------|---------|--------|---|
| 5022 | 1 | 4  | 19 | 9 | 532.84  | 426.78  | 22.29  | o |
| 5023 | 1 | 5  | 19 | 9 | 339.58  | 293.01  | 15.92  | o |
| 5024 | 1 | 6  | 19 | 9 | 24.38   | 44.59   | 47.77  | < |
| 5025 | 1 | 7  | 19 | 9 | 711.07  | 710.24  | 254.79 | < |
| 5026 | 1 | 8  | 19 | 9 | 67.71   | 47.77   | 9.55   | o |
| 5027 | 1 | -7 | 20 | 9 | 9.21    | 25.48   | 15.92  | < |
| 5028 | 1 | -6 | 20 | 9 | 710.64  | 624.25  | 28.66  | o |
| 5029 | 1 | -5 | 20 | 9 | 153.71  | 149.69  | 9.55   | o |
| 5030 | 1 | -4 | 20 | 9 | 12.85   | 15.92   | 25.48  | < |
| 5031 | 1 | -3 | 20 | 9 | 11.53   | 9.55    | 3.18   | o |
| 5032 | 1 | -2 | 20 | 9 | 121.65  | 108.29  | 6.37   | o |
| 5033 | 1 | -1 | 20 | 9 | 15.86   | 41.40   | 6.37   | o |
| 5034 | 1 | 0  | 20 | 9 | 14.63   | 19.11   | 3.18   | o |
| 5035 | 1 | 1  | 20 | 9 | 6.43    | 25.48   | 3.18   | o |
| 5036 | 1 | 3  | 20 | 9 | 0.07    | 3.18    | 3.18   | < |
| 5037 | 1 | 4  | 20 | 9 | 210.67  | 175.17  | 9.55   | o |
| 5038 | 1 | 5  | 20 | 9 | 214.00  | 187.91  | 12.74  | o |
| 5039 | 1 | 6  | 20 | 9 | 383.63  | 340.79  | 22.29  | o |
| 5040 | 1 | 7  | 20 | 9 | 32.42   | 79.62   | 9.55   | o |
| 5041 | 1 | 8  | 20 | 9 | 406.60  | 337.60  | 22.29  | o |
| 5042 | 1 | -6 | 21 | 9 | 3.19    | 15.92   | 6.37   | < |
| 5043 | 1 | -5 | 21 | 9 | 78.90   | 101.92  | 9.55   | o |
| 5044 | 1 | -4 | 21 | 9 | 114.59  | 108.29  | 9.55   | o |
| 5045 | 1 | -3 | 21 | 9 | 46.57   | 41.40   | 6.37   | o |
| 5046 | 1 | -2 | 21 | 9 | 337.28  | 353.53  | 15.92  | o |
| 5047 | 1 | -1 | 21 | 9 | 887.90  | 828.08  | 28.66  | o |
| 5048 | 1 | 0  | 21 | 9 | 151.44  | 226.13  | 12.74  | o |
| 5049 | 1 | 1  | 21 | 9 | 918.35  | 735.72  | 28.66  | o |
| 5050 | 1 | 2  | 21 | 9 | 817.38  | 738.90  | 28.66  | o |
| 5051 | 1 | 3  | 21 | 9 | 9.41    | 22.29   | 3.18   | o |
| 5052 | 1 | 4  | 21 | 9 | 45.11   | 44.59   | 6.37   | o |
| 5053 | 1 | 5  | 21 | 9 | 129.57  | 165.62  | 12.74  | o |
| 5054 | 1 | 6  | 21 | 9 | 0.23    | 6.37    | 6.37   | < |
| 5055 | 1 | 7  | 21 | 9 | 315.40  | 235.68  | 22.29  | o |
| 5056 | 1 | -6 | 22 | 9 | 113.96  | 98.73   | 12.74  | o |
| 5057 | 1 | -5 | 22 | 9 | 15.76   | 9.55    | 6.37   | < |
| 5058 | 1 | -4 | 22 | 9 | 46.56   | 41.40   | 15.92  | < |
| 5059 | 1 | -3 | 22 | 9 | 189.75  | 152.88  | 9.55   | o |
| 5060 | 1 | -2 | 22 | 9 | 312.24  | 264.35  | 15.92  | o |
| 5061 | 1 | -1 | 22 | 9 | 162.08  | 156.06  | 9.55   | o |
| 5062 | 1 | 0  | 22 | 9 | 1167.79 | 1108.35 | 38.22  | o |
| 5063 | 1 | 1  | 22 | 9 | 135.49  | 127.40  | 9.55   | o |
| 5064 | 1 | 2  | 22 | 9 | 123.09  | 143.32  | 9.55   | o |
| 5065 | 1 | 3  | 22 | 9 | 127.25  | 149.69  | 9.55   | o |
| 5066 | 1 | 4  | 22 | 9 | 284.95  | 238.87  | 25.48  | o |
| 5067 | 1 | 5  | 22 | 9 | 75.56   | 70.07   | 9.55   | o |
| 5068 | 1 | 6  | 22 | 9 | 3.62    | 6.37    | 6.37   | < |
| 5069 | 1 | 7  | 22 | 9 | 25.20   | 28.66   | 9.55   | < |
| 5070 | 1 | -5 | 23 | 9 | 361.13  | 273.90  | 19.11  | o |
| 5071 | 1 | -4 | 23 | 9 | 649.58  | 458.63  | 25.48  | o |
| 5072 | 1 | -3 | 23 | 9 | 0.23    | 6.37    | 3.18   | < |
| 5073 | 1 | -2 | 23 | 9 | 1169.05 | 866.30  | 44.59  | o |
| 5074 | 1 | -1 | 23 | 9 | 2049.49 | 2216.71 | 101.92 | o |
| 5075 | 1 | 0  | 23 | 9 | 49.75   | 70.07   | 9.55   | o |
| 5076 | 1 | 1  | 23 | 9 | 2153.94 | 2184.86 | 98.73  | o |
| 5077 | 1 | 2  | 23 | 9 | 643.43  | 500.03  | 38.22  | o |
| 5078 | 1 | 3  | 23 | 9 | 17.74   | 9.55    | 6.37   | < |
| 5079 | 1 | 4  | 23 | 9 | 192.45  | 124.21  | 15.92  | o |

|      |   |     |    |    |          |          |         |   |
|------|---|-----|----|----|----------|----------|---------|---|
| 5080 | 1 | -4  | 24 | 9  | 121.48   | 114.66   | 12.74   | o |
| 5081 | 1 | -3  | 24 | 9  | 15.99    | 12.74    | 6.37    | < |
| 5082 | 1 | -2  | 24 | 9  | 130.83   | 98.73    | 15.92   | o |
| 5083 | 1 | -1  | 24 | 9  | 17.56    | 9.55     | 6.37    | < |
| 5084 | 1 | -10 | 0  | 10 | 1454.37  | 1280.34  | 60.51   | o |
| 5085 | 1 | -9  | 0  | 10 | 37.44    | 92.36    | 9.55    | o |
| 5086 | 1 | -8  | 0  | 10 | 822.36   | 764.38   | 41.40   | o |
| 5087 | 1 | -6  | 0  | 10 | 14101.70 | 15924.60 | 684.76  | o |
| 5088 | 1 | -5  | 0  | 10 | 2621.90  | 3780.51  | 165.62  | o |
| 5089 | 1 | -4  | 0  | 10 | 27697.30 | 29371.40 | 1254.86 | o |
| 5090 | 1 | -3  | 0  | 10 | 46.57    | 76.44    | 9.55    | o |
| 5091 | 1 | -2  | 0  | 10 | 5443.54  | 5452.60  | 235.68  | o |
| 5092 | 1 | -1  | 0  | 10 | 878.74   | 764.38   | 38.22   | o |
| 5093 | 1 | 0   | 0  | 10 | 353.17   | 277.09   | 15.92   | o |
| 5094 | 1 | 1   | 0  | 10 | 1452.81  | 1242.12  | 57.33   | o |
| 5095 | 1 | 2   | 0  | 10 | 3638.37  | 3277.29  | 143.32  | o |
| 5096 | 1 | 3   | 0  | 10 | 856.02   | 707.05   | 50.96   | o |
| 5097 | 1 | 4   | 0  | 10 | 25097.20 | 24192.70 | 1035.10 | o |
| 5098 | 1 | 5   | 0  | 10 | 3025.63  | 3401.50  | 149.69  | o |
| 5099 | 1 | 6   | 0  | 10 | 14330.20 | 14778.10 | 898.15  | o |
| 5100 | 1 | 7   | 0  | 10 | 647.12   | 952.29   | 47.77   | o |
| 5101 | 1 | 8   | 0  | 10 | 534.35   | 442.70   | 25.48   | o |
| 5102 | 1 | 9   | 0  | 10 | 305.89   | 366.27   | 22.29   | o |
| 5103 | 1 | 10  | 0  | 10 | 825.53   | 869.48   | 44.59   | o |
| 5104 | 1 | 11  | 0  | 10 | 246.94   | 257.98   | 19.11   | o |
| 5105 | 1 | -10 | 1  | 10 | 2.38     | 15.92    | 3.18    | o |
| 5106 | 1 | -9  | 1  | 10 | 89.14    | 89.18    | 6.37    | o |
| 5107 | 1 | -8  | 1  | 10 | 574.38   | 595.58   | 22.29   | o |
| 5108 | 1 | -7  | 1  | 10 | 1176.31  | 1430.03  | 47.77   | o |
| 5109 | 1 | -6  | 1  | 10 | 15.43    | 19.11    | 3.18    | o |
| 5110 | 1 | -5  | 1  | 10 | 373.27   | 375.82   | 226.13  | < |
| 5111 | 1 | -4  | 1  | 10 | 108.86   | 133.77   | 6.37    | o |
| 5112 | 1 | -3  | 1  | 10 | 1299.91  | 1445.96  | 47.77   | o |
| 5113 | 1 | -2  | 1  | 10 | 34.46    | 63.70    | 6.37    | o |
| 5114 | 1 | -1  | 1  | 10 | 184.86   | 156.06   | 9.55    | o |
| 5115 | 1 | 0   | 1  | 10 | 23.17    | 19.11    | 3.18    | o |
| 5116 | 1 | 1   | 1  | 10 | 31.86    | 44.59    | 6.37    | o |
| 5117 | 1 | 2   | 1  | 10 | 477.94   | 429.96   | 15.92   | o |
| 5118 | 1 | 3   | 1  | 10 | 540.39   | 474.55   | 25.48   | o |
| 5119 | 1 | 4   | 1  | 10 | 10.96    | 22.29    | 3.18    | o |
| 5120 | 1 | 5   | 1  | 10 | 1762.88  | 1933.25  | 60.51   | o |
| 5121 | 1 | 7   | 1  | 10 | 1046.16  | 1149.76  | 127.40  | o |
| 5122 | 1 | 8   | 1  | 10 | 695.91   | 799.42   | 28.66   | o |
| 5123 | 1 | 9   | 1  | 10 | 144.24   | 165.62   | 9.55    | o |
| 5124 | 1 | 10  | 1  | 10 | 28.37    | 28.66    | 3.18    | o |
| 5125 | 1 | 11  | 1  | 10 | 48.43    | 66.88    | 6.37    | o |
| 5126 | 1 | -11 | 2  | 10 | 29.47    | 57.33    | 9.55    | o |
| 5127 | 1 | -10 | 2  | 10 | 2378.78  | 2277.22  | 79.62   | o |
| 5128 | 1 | -9  | 2  | 10 | 841.45   | 1057.40  | 38.22   | o |
| 5129 | 1 | -8  | 2  | 10 | 2893.11  | 3022.50  | 95.55   | o |
| 5130 | 1 | -7  | 2  | 10 | 12.73    | 12.74    | 3.18    | o |
| 5131 | 1 | -6  | 2  | 10 | 853.52   | 837.64   | 28.66   | o |
| 5132 | 1 | -5  | 2  | 10 | 36.96    | 44.59    | 3.18    | o |
| 5133 | 1 | -4  | 2  | 10 | 4742.40  | 5255.13  | 162.43  | o |
| 5134 | 1 | -2  | 2  | 10 | 8359.17  | 9112.08  | 277.09  | o |
| 5135 | 1 | -1  | 2  | 10 | 2198.54  | 2296.33  | 73.25   | o |
| 5136 | 1 | 0   | 2  | 10 | 3871.43  | 3805.99  | 117.84  | o |
| 5137 | 1 | 1   | 2  | 10 | 2002.78  | 1872.74  | 70.07   | o |

|      |   |     |   |    |          |         |        |   |
|------|---|-----|---|----|----------|---------|--------|---|
| 5138 | 1 | 2   | 2 | 10 | 10992.60 | 9854.16 | 379.01 | o |
| 5139 | 1 | 4   | 2 | 10 | 3679.80  | 3401.50 | 105.10 | o |
| 5140 | 1 | 5   | 2 | 10 | 13.51    | 12.74   | 3.18   | o |
| 5141 | 1 | 6   | 2 | 10 | 411.06   | 363.08  | 19.11  | o |
| 5142 | 1 | 7   | 2 | 10 | 71.74    | 70.07   | 6.37   | o |
| 5143 | 1 | 8   | 2 | 10 | 2541.07  | 2850.51 | 89.18  | o |
| 5144 | 1 | 10  | 2 | 10 | 2369.07  | 2723.11 | 89.18  | o |
| 5145 | 1 | 11  | 2 | 10 | 74.50    | 82.81   | 6.37   | o |
| 5146 | 1 | 12  | 2 | 10 | 1141.44  | 550.99  | 391.75 | < |
| 5147 | 1 | -11 | 3 | 10 | 196.01   | 203.84  | 19.11  | o |
| 5148 | 1 | -10 | 3 | 10 | 584.53   | 611.51  | 22.29  | o |
| 5149 | 1 | -9  | 3 | 10 | 504.32   | 519.14  | 19.11  | o |
| 5150 | 1 | -8  | 3 | 10 | 585.70   | 678.39  | 25.48  | o |
| 5151 | 1 | -7  | 3 | 10 | 106.35   | 85.99   | 76.44  | < |
| 5152 | 1 | -6  | 3 | 10 | 426.43   | 480.92  | 19.11  | o |
| 5153 | 1 | -5  | 3 | 10 | 105.15   | 105.10  | 6.37   | o |
| 5154 | 1 | -4  | 3 | 10 | 15.66    | 28.66   | 6.37   | o |
| 5155 | 1 | -3  | 3 | 10 | 387.03   | 347.16  | 15.92  | o |
| 5156 | 1 | -2  | 3 | 10 | 13.83    | 28.66   | 3.18   | o |
| 5157 | 1 | -1  | 3 | 10 | 2080.89  | 2073.39 | 66.88  | o |
| 5158 | 1 | 1   | 3 | 10 | 871.92   | 831.27  | 28.66  | o |
| 5159 | 1 | 2   | 3 | 10 | 4.91     | 15.92   | 3.18   | o |
| 5160 | 1 | 3   | 3 | 10 | 997.83   | 980.96  | 38.22  | o |
| 5161 | 1 | 4   | 3 | 10 | 292.75   | 273.90  | 12.74  | o |
| 5162 | 1 | 5   | 3 | 10 | 222.44   | 229.32  | 12.74  | o |
| 5163 | 1 | 6   | 3 | 10 | 49.69    | 44.59   | 41.40  | < |
| 5164 | 1 | 7   | 3 | 10 | 435.57   | 436.33  | 19.11  | o |
| 5165 | 1 | 8   | 3 | 10 | 220.91   | 213.39  | 19.11  | o |
| 5166 | 1 | 9   | 3 | 10 | 670.59   | 652.91  | 25.48  | o |
| 5167 | 1 | 10  | 3 | 10 | 258.52   | 257.98  | 12.74  | o |
| 5168 | 1 | 11  | 3 | 10 | 143.99   | 143.32  | 9.55   | o |
| 5169 | 1 | 12  | 3 | 10 | 155.41   | 133.77  | 19.11  | o |
| 5170 | 1 | -10 | 4 | 10 | 1442.18  | 1245.31 | 44.59  | o |
| 5171 | 1 | -8  | 4 | 10 | 4.18     | 9.55    | 3.18   | o |
| 5172 | 1 | -7  | 4 | 10 | 350.93   | 394.93  | 22.29  | o |
| 5173 | 1 | -6  | 4 | 10 | 486.45   | 474.55  | 19.11  | o |
| 5174 | 1 | -5  | 4 | 10 | 903.49   | 866.30  | 31.85  | o |
| 5175 | 1 | -4  | 4 | 10 | 480.64   | 449.08  | 19.11  | o |
| 5176 | 1 | -3  | 4 | 10 | 1316.49  | 1465.07 | 47.77  | o |
| 5177 | 1 | -2  | 4 | 10 | 8380.95  | 8892.32 | 270.72 | o |
| 5178 | 1 | 0   | 4 | 10 | 5377.11  | 5841.16 | 178.36 | o |
| 5179 | 1 | 2   | 4 | 10 | 7398.70  | 7344.44 | 318.49 | o |
| 5180 | 1 | 3   | 4 | 10 | 1700.66  | 1503.29 | 50.96  | o |
| 5181 | 1 | 4   | 4 | 10 | 259.31   | 210.21  | 9.55   | o |
| 5182 | 1 | 5   | 4 | 10 | 99.14    | 57.33   | 433.15 | < |
| 5183 | 1 | 6   | 4 | 10 | 93.30    | 57.33   | 22.29  | < |
| 5184 | 1 | 7   | 4 | 10 | 51.34    | 89.18   | 79.62  | < |
| 5185 | 1 | 8   | 4 | 10 | 4.11     | 6.37    | 3.18   | < |
| 5186 | 1 | 9   | 4 | 10 | 268.75   | 308.94  | 15.92  | o |
| 5187 | 1 | 10  | 4 | 10 | 1072.42  | 1022.36 | 38.22  | o |
| 5188 | 1 | 11  | 4 | 10 | 311.49   | 334.42  | 19.11  | o |
| 5189 | 1 | 12  | 4 | 10 | 2554.04  | 1652.98 | 171.99 | o |
| 5190 | 1 | -11 | 5 | 10 | 29.93    | 31.85   | 6.37   | o |
| 5191 | 1 | -10 | 5 | 10 | 226.51   | 200.65  | 12.74  | o |
| 5192 | 1 | -9  | 5 | 10 | 331.12   | 296.20  | 12.74  | o |
| 5193 | 1 | -8  | 5 | 10 | 6.00     | 6.37    | 3.18   | < |
| 5194 | 1 | -7  | 5 | 10 | 57.44    | 54.14   | 28.66  | < |
| 5195 | 1 | -6  | 5 | 10 | 677.24   | 710.24  | 31.85  | o |



|      |   |     |   |    |          |          |        |   |
|------|---|-----|---|----|----------|----------|--------|---|
| 5196 | 1 | -5  | 5 | 10 | 1304.42  | 1506.47  | 57.33  | o |
| 5197 | 1 | -4  | 5 | 10 | 26.54    | 25.48    | 3.18   | o |
| 5198 | 1 | -3  | 5 | 10 | 49.11    | 50.96    | 6.37   | o |
| 5199 | 1 | -2  | 5 | 10 | 93.91    | 76.44    | 6.37   | o |
| 5200 | 1 | -1  | 5 | 10 | 1392.29  | 1407.74  | 54.14  | o |
| 5201 | 1 | 0   | 5 | 10 | 120.31   | 146.51   | 9.55   | o |
| 5202 | 1 | 1   | 5 | 10 | 406.55   | 414.04   | 22.29  | o |
| 5203 | 1 | 2   | 5 | 10 | 13.85    | 15.92    | 3.18   | o |
| 5204 | 1 | 3   | 5 | 10 | 393.43   | 356.71   | 15.92  | o |
| 5205 | 1 | 4   | 5 | 10 | 88.53    | 108.29   | 9.55   | o |
| 5206 | 1 | 5   | 5 | 10 | 739.60   | 649.72   | 60.51  | o |
| 5207 | 1 | 6   | 5 | 10 | 713.42   | 659.28   | 28.66  | o |
| 5208 | 1 | 7   | 5 | 10 | 357.81   | 356.71   | 15.92  | o |
| 5209 | 1 | 8   | 5 | 10 | 38.25    | 54.14    | 6.37   | o |
| 5210 | 1 | 9   | 5 | 10 | 265.27   | 264.35   | 12.74  | o |
| 5211 | 1 | 10  | 5 | 10 | 130.26   | 127.40   | 9.55   | o |
| 5212 | 1 | 11  | 5 | 10 | 44.91    | 50.96    | 6.37   | o |
| 5213 | 1 | 12  | 5 | 10 | 33.45    | 44.59    | 6.37   | o |
| 5214 | 1 | -11 | 6 | 10 | 173.16   | 168.80   | 15.92  | o |
| 5215 | 1 | -10 | 6 | 10 | 406.12   | 356.71   | 19.11  | o |
| 5216 | 1 | -9  | 6 | 10 | 981.79   | 1012.81  | 41.40  | o |
| 5217 | 1 | -8  | 6 | 10 | 3582.80  | 3646.74  | 114.66 | o |
| 5218 | 1 | -7  | 6 | 10 | 742.47   | 640.17   | 25.48  | o |
| 5219 | 1 | -6  | 6 | 10 | 13162.10 | 14376.80 | 503.22 | o |
| 5220 | 1 | -5  | 6 | 10 | 418.49   | 496.85   | 19.11  | o |
| 5221 | 1 | -4  | 6 | 10 | 10948.10 | 11736.50 | 356.71 | o |
| 5222 | 1 | -2  | 6 | 10 | 3969.83  | 4223.21  | 149.69 | o |
| 5223 | 1 | -1  | 6 | 10 | 137.43   | 149.69   | 9.55   | o |
| 5224 | 1 | 0   | 6 | 10 | 36.33    | 50.96    | 6.37   | o |
| 5225 | 1 | 1   | 6 | 10 | 28.08    | 50.96    | 6.37   | o |
| 5226 | 1 | 2   | 6 | 10 | 3865.42  | 3777.32  | 136.95 | o |
| 5227 | 1 | 4   | 6 | 10 | 12169.30 | 12080.40 | 366.27 | o |
| 5228 | 1 | 5   | 6 | 10 | 1654.78  | 1742.16  | 66.88  | o |
| 5229 | 1 | 6   | 6 | 10 | 12061.00 | 12599.60 | 385.38 | o |
| 5230 | 1 | 7   | 6 | 10 | 1094.50  | 1137.02  | 38.22  | o |
| 5231 | 1 | 8   | 6 | 10 | 3802.52  | 4181.81  | 133.77 | o |
| 5232 | 1 | 10  | 6 | 10 | 183.16   | 159.25   | 9.55   | o |
| 5233 | 1 | 11  | 6 | 10 | 80.67    | 105.10   | 9.55   | o |
| 5234 | 1 | 12  | 6 | 10 | 234.77   | 184.73   | 15.92  | o |
| 5235 | 1 | -11 | 7 | 10 | 42.10    | 41.40    | 9.55   | o |
| 5236 | 1 | -10 | 7 | 10 | 25.32    | 22.29    | 3.18   | o |
| 5237 | 1 | -9  | 7 | 10 | 138.95   | 121.03   | 12.74  | o |
| 5238 | 1 | -8  | 7 | 10 | 86.74    | 85.99    | 6.37   | o |
| 5239 | 1 | -7  | 7 | 10 | 499.51   | 509.59   | 25.48  | o |
| 5240 | 1 | -6  | 7 | 10 | 453.46   | 455.45   | 22.29  | o |
| 5241 | 1 | -5  | 7 | 10 | 372.84   | 369.45   | 15.92  | o |
| 5242 | 1 | -4  | 7 | 10 | 27.99    | 38.22    | 3.18   | o |
| 5243 | 1 | -3  | 7 | 10 | 73.39    | 92.36    | 6.37   | o |
| 5244 | 1 | -2  | 7 | 10 | 48.39    | 57.33    | 6.37   | o |
| 5245 | 1 | -1  | 7 | 10 | 65.68    | 63.70    | 6.37   | o |
| 5246 | 1 | 0   | 7 | 10 | 193.85   | 197.46   | 9.55   | o |
| 5247 | 1 | 1   | 7 | 10 | 112.03   | 105.10   | 6.37   | o |
| 5248 | 1 | 2   | 7 | 10 | 620.38   | 579.66   | 25.48  | o |
| 5249 | 1 | 3   | 7 | 10 | 253.35   | 245.24   | 12.74  | o |
| 5250 | 1 | 4   | 7 | 10 | 64.61    | 47.77    | 6.37   | o |
| 5251 | 1 | 5   | 7 | 10 | 505.40   | 515.96   | 25.48  | o |
| 5252 | 1 | 6   | 7 | 10 | 407.89   | 433.15   | 19.11  | o |
| 5253 | 1 | 7   | 7 | 10 | 817.92   | 923.63   | 31.85  | o |

|      |   |     |    |    |          |          |        |   |
|------|---|-----|----|----|----------|----------|--------|---|
| 5254 | 1 | 8   | 7  | 10 | 43.07    | 54.14    | 73.25  | < |
| 5255 | 1 | 9   | 7  | 10 | 413.61   | 426.78   | 19.11  | o |
| 5256 | 1 | 10  | 7  | 10 | 4.41     | 9.55     | 3.18   | o |
| 5257 | 1 | 11  | 7  | 10 | 125.62   | 127.40   | 9.55   | o |
| 5258 | 1 | 12  | 7  | 10 | 3.89     | 6.37     | 6.37   | < |
| 5259 | 1 | -11 | 8  | 10 | 31.57    | 57.33    | 12.74  | o |
| 5260 | 1 | -10 | 8  | 10 | 51.79    | 47.77    | 9.55   | o |
| 5261 | 1 | -9  | 8  | 10 | 689.06   | 589.21   | 22.29  | o |
| 5262 | 1 | -8  | 8  | 10 | 770.93   | 758.01   | 28.66  | o |
| 5263 | 1 | -7  | 8  | 10 | 974.50   | 920.44   | 98.73  | o |
| 5264 | 1 | -6  | 8  | 10 | 185.95   | 159.25   | 22.29  | o |
| 5265 | 1 | -5  | 8  | 10 | 273.14   | 280.27   | 15.92  | o |
| 5266 | 1 | -4  | 8  | 10 | 15.30    | 44.59    | 6.37   | o |
| 5267 | 1 | -3  | 8  | 10 | 651.58   | 761.20   | 31.85  | o |
| 5268 | 1 | -2  | 8  | 10 | 557.29   | 557.36   | 25.48  | o |
| 5269 | 1 | -1  | 8  | 10 | 1378.80  | 1445.96  | 47.77  | o |
| 5270 | 1 | 0   | 8  | 10 | 2368.35  | 2477.87  | 89.18  | o |
| 5271 | 1 | 1   | 8  | 10 | 1350.07  | 1286.71  | 41.40  | o |
| 5272 | 1 | 2   | 8  | 10 | 323.21   | 293.01   | 19.11  | o |
| 5273 | 1 | 4   | 8  | 10 | 58.53    | 73.25    | 6.37   | o |
| 5274 | 1 | 5   | 8  | 10 | 265.21   | 242.05   | 12.74  | o |
| 5275 | 1 | 6   | 8  | 10 | 366.53   | 369.45   | 15.92  | o |
| 5276 | 1 | 7   | 8  | 10 | 1652.33  | 1735.79  | 57.33  | o |
| 5277 | 1 | 8   | 8  | 10 | 142.30   | 114.66   | 19.11  | o |
| 5278 | 1 | 9   | 8  | 10 | 454.07   | 474.55   | 19.11  | o |
| 5279 | 1 | 10  | 8  | 10 | 110.14   | 95.55    | 9.55   | o |
| 5280 | 1 | 11  | 8  | 10 | 2.72     | 25.48    | 6.37   | o |
| 5281 | 1 | -10 | 9  | 10 | 98.21    | 114.66   | 9.55   | o |
| 5282 | 1 | -9  | 9  | 10 | 39.63    | 28.66    | 3.18   | o |
| 5283 | 1 | -8  | 9  | 10 | 961.85   | 901.33   | 35.03  | o |
| 5284 | 1 | -7  | 9  | 10 | 464.09   | 420.41   | 15.92  | o |
| 5285 | 1 | -6  | 9  | 10 | 74.82    | 76.44    | 15.92  | o |
| 5286 | 1 | -5  | 9  | 10 | 12.31    | 9.55     | 22.29  | < |
| 5287 | 1 | -4  | 9  | 10 | 379.50   | 331.23   | 15.92  | o |
| 5288 | 1 | -3  | 9  | 10 | 817.84   | 716.61   | 31.85  | o |
| 5289 | 1 | -2  | 9  | 10 | 237.97   | 245.24   | 15.92  | o |
| 5290 | 1 | -1  | 9  | 10 | 468.56   | 630.62   | 28.66  | o |
| 5291 | 1 | 0   | 9  | 10 | 5.27     | 12.74    | 3.18   | o |
| 5292 | 1 | 1   | 9  | 10 | 2193.09  | 2293.15  | 105.10 | o |
| 5293 | 1 | 2   | 9  | 10 | 490.65   | 493.66   | 19.11  | o |
| 5294 | 1 | 3   | 9  | 10 | 211.21   | 200.65   | 9.55   | o |
| 5295 | 1 | 4   | 9  | 10 | 296.68   | 242.05   | 50.96  | o |
| 5296 | 1 | 5   | 9  | 10 | 408.08   | 404.49   | 15.92  | o |
| 5297 | 1 | 6   | 9  | 10 | 114.55   | 114.66   | 6.37   | o |
| 5298 | 1 | 7   | 9  | 10 | 546.11   | 509.59   | 19.11  | o |
| 5299 | 1 | 8   | 9  | 10 | 368.61   | 337.60   | 19.11  | o |
| 5300 | 1 | 9   | 9  | 10 | 110.51   | 121.03   | 9.55   | o |
| 5301 | 1 | 10  | 9  | 10 | 74.14    | 82.81    | 6.37   | o |
| 5302 | 1 | 11  | 9  | 10 | 241.16   | 194.28   | 19.11  | o |
| 5303 | 1 | -10 | 10 | 10 | 2660.07  | 2745.41  | 124.21 | o |
| 5304 | 1 | -8  | 10 | 10 | 2868.51  | 2210.34  | 85.99  | o |
| 5305 | 1 | -7  | 10 | 10 | 555.87   | 570.10   | 22.29  | o |
| 5306 | 1 | -6  | 10 | 10 | 27.08    | 28.66    | 3.18   | o |
| 5307 | 1 | -5  | 10 | 10 | 106.26   | 66.88    | 6.37   | o |
| 5308 | 1 | -4  | 10 | 10 | 7055.43  | 7064.17  | 251.61 | o |
| 5309 | 1 | -2  | 10 | 10 | 4495.90  | 5064.03  | 156.06 | o |
| 5310 | 1 | -1  | 10 | 10 | 1783.52  | 1901.40  | 70.07  | o |
| 5311 | 1 | 0   | 10 | 10 | 23622.20 | 25673.70 | 898.15 | o |

|      |   |     |    |    |          |          |        |   |
|------|---|-----|----|----|----------|----------|--------|---|
| 5312 | 1 | 1   | 10 | 10 | 2785.88  | 2764.52  | 85.99  | o |
| 5313 | 1 | 2   | 10 | 10 | 4475.72  | 4490.75  | 140.14 | o |
| 5314 | 1 | 4   | 10 | 10 | 5459.17  | 5175.51  | 159.25 | o |
| 5315 | 1 | 6   | 10 | 10 | 54.96    | 47.77    | 6.37   | o |
| 5316 | 1 | 7   | 10 | 10 | 132.62   | 156.06   | 31.85  | o |
| 5317 | 1 | 8   | 10 | 10 | 1606.69  | 1458.70  | 50.96  | o |
| 5318 | 1 | 9   | 10 | 10 | 770.89   | 1003.25  | 35.03  | o |
| 5319 | 1 | 10  | 10 | 10 | 2721.13  | 2764.52  | 105.10 | o |
| 5320 | 1 | 11  | 10 | 10 | 132.61   | 156.06   | 12.74  | o |
| 5321 | 1 | -10 | 11 | 10 | 31.78    | 35.03    | 6.37   | o |
| 5322 | 1 | -9  | 11 | 10 | 31.99    | 28.66    | 3.18   | o |
| 5323 | 1 | -8  | 11 | 10 | 75.84    | 73.25    | 6.37   | o |
| 5324 | 1 | -7  | 11 | 10 | 376.92   | 328.05   | 15.92  | o |
| 5325 | 1 | -6  | 11 | 10 | 133.16   | 114.66   | 9.55   | o |
| 5326 | 1 | -5  | 11 | 10 | 360.59   | 299.38   | 19.11  | o |
| 5327 | 1 | -4  | 11 | 10 | 330.72   | 293.01   | 12.74  | o |
| 5328 | 1 | -3  | 11 | 10 | 813.89   | 805.79   | 28.66  | o |
| 5329 | 1 | -2  | 11 | 10 | 72.19    | 63.70    | 6.37   | o |
| 5330 | 1 | -1  | 11 | 10 | 2.81     | 15.92    | 3.18   | o |
| 5331 | 1 | 0   | 11 | 10 | 51.79    | 63.70    | 6.37   | o |
| 5332 | 1 | 1   | 11 | 10 | 231.77   | 181.54   | 9.55   | o |
| 5333 | 1 | 2   | 11 | 10 | 58.78    | 76.44    | 6.37   | o |
| 5334 | 1 | 3   | 11 | 10 | 610.99   | 592.40   | 22.29  | o |
| 5335 | 1 | 4   | 11 | 10 | 317.83   | 277.09   | 12.74  | o |
| 5336 | 1 | 5   | 11 | 10 | 793.15   | 735.72   | 28.66  | o |
| 5337 | 1 | 6   | 11 | 10 | 3.65     | 25.48    | 6.37   | o |
| 5338 | 1 | 7   | 11 | 10 | 354.05   | 337.60   | 15.92  | o |
| 5339 | 1 | 8   | 11 | 10 | 27.76    | 35.03    | 6.37   | o |
| 5340 | 1 | 9   | 11 | 10 | 54.99    | 57.33    | 6.37   | o |
| 5341 | 1 | 10  | 11 | 10 | 15.44    | 15.92    | 3.18   | o |
| 5342 | 1 | 11  | 11 | 10 | 39.80    | 28.66    | 9.55   | < |
| 5343 | 1 | -10 | 12 | 10 | 590.47   | 547.81   | 31.85  | o |
| 5344 | 1 | -8  | 12 | 10 | 284.55   | 267.53   | 12.74  | o |
| 5345 | 1 | -7  | 12 | 10 | 70.36    | 261.16   | 547.81 | < |
| 5346 | 1 | -6  | 12 | 10 | 10551.00 | 10417.90 | 340.79 | o |
| 5347 | 1 | -5  | 12 | 10 | 464.38   | 646.54   | 25.48  | o |
| 5348 | 1 | -4  | 12 | 10 | 5271.47  | 5153.21  | 184.73 | o |
| 5349 | 1 | -3  | 12 | 10 | 292.86   | 242.05   | 12.74  | o |
| 5350 | 1 | -2  | 12 | 10 | 152.29   | 111.47   | 6.37   | o |
| 5351 | 1 | -1  | 12 | 10 | 131.12   | 162.43   | 9.55   | o |
| 5352 | 1 | 0   | 12 | 10 | 1559.96  | 1522.40  | 50.96  | o |
| 5353 | 1 | 1   | 12 | 10 | 307.54   | 280.27   | 12.74  | o |
| 5354 | 1 | 2   | 12 | 10 | 227.64   | 187.91   | 9.55   | o |
| 5355 | 1 | 3   | 12 | 10 | 58.86    | 79.62    | 6.37   | o |
| 5356 | 1 | 4   | 12 | 10 | 6120.07  | 5799.75  | 178.36 | o |
| 5357 | 1 | 5   | 12 | 10 | 189.95   | 302.57   | 25.48  | o |
| 5358 | 1 | 6   | 12 | 10 | 10252.90 | 10583.50 | 375.82 | o |
| 5359 | 1 | 8   | 12 | 10 | 281.56   | 277.09   | 12.74  | o |
| 5360 | 1 | 10  | 12 | 10 | 589.35   | 525.51   | 22.29  | o |
| 5361 | 1 | -10 | 13 | 10 | 127.42   | 140.14   | 12.74  | o |
| 5362 | 1 | -9  | 13 | 10 | 99.28    | 121.03   | 19.11  | o |
| 5363 | 1 | -8  | 13 | 10 | 36.94    | 41.40    | 6.37   | o |
| 5364 | 1 | -7  | 13 | 10 | 343.43   | 232.50   | 19.11  | o |
| 5365 | 1 | -6  | 13 | 10 | 321.89   | 270.72   | 12.74  | o |
| 5366 | 1 | -5  | 13 | 10 | 954.34   | 949.11   | 38.22  | o |
| 5367 | 1 | -4  | 13 | 10 | 48.70    | 50.96    | 6.37   | o |
| 5368 | 1 | -3  | 13 | 10 | 30.05    | 54.14    | 9.55   | o |
| 5369 | 1 | -2  | 13 | 10 | 63.76    | 73.25    | 6.37   | o |

|      |   |     |    |    |          |          |        |   |
|------|---|-----|----|----|----------|----------|--------|---|
| 5370 | 1 | 0   | 13 | 10 | 270.59   | 267.53   | 12.74  | o |
| 5371 | 1 | 1   | 13 | 10 | 220.71   | 168.80   | 9.55   | o |
| 5372 | 1 | 2   | 13 | 10 | 187.54   | 159.25   | 9.55   | o |
| 5373 | 1 | 3   | 13 | 10 | 364.38   | 404.49   | 19.11  | o |
| 5374 | 1 | 4   | 13 | 10 | 261.64   | 235.68   | 12.74  | o |
| 5375 | 1 | 5   | 13 | 10 | 696.68   | 605.14   | 28.66  | o |
| 5376 | 1 | 6   | 13 | 10 | 434.02   | 414.04   | 19.11  | o |
| 5377 | 1 | 7   | 13 | 10 | 955.53   | 974.59   | 35.03  | o |
| 5378 | 1 | 8   | 13 | 10 | 35.29    | 57.33    | 6.37   | o |
| 5379 | 1 | 9   | 13 | 10 | 263.45   | 232.50   | 12.74  | o |
| 5380 | 1 | 10  | 13 | 10 | 29.79    | 12.74    | 6.37   | < |
| 5381 | 1 | -10 | 14 | 10 | 782.67   | 719.79   | 38.22  | o |
| 5382 | 1 | -9  | 14 | 10 | 256.58   | 283.46   | 19.11  | o |
| 5383 | 1 | -8  | 14 | 10 | 1242.18  | 923.63   | 41.40  | o |
| 5384 | 1 | -6  | 14 | 10 | 3862.69  | 3882.43  | 171.99 | o |
| 5385 | 1 | -5  | 14 | 10 | 28.01    | 6.37     | 15.92  | < |
| 5386 | 1 | -4  | 14 | 10 | 1273.69  | 1114.72  | 38.22  | o |
| 5387 | 1 | -2  | 14 | 10 | 6333.57  | 6758.42  | 207.02 | o |
| 5388 | 1 | 0   | 14 | 10 | 910.32   | 831.27   | 28.66  | o |
| 5389 | 1 | 1   | 14 | 10 | 7.44     | 38.22    | 6.37   | o |
| 5390 | 1 | 2   | 14 | 10 | 7204.24  | 7583.31  | 232.50 | o |
| 5391 | 1 | 3   | 14 | 10 | 717.06   | 942.74   | 38.22  | o |
| 5392 | 1 | 4   | 14 | 10 | 1262.68  | 1178.42  | 47.77  | o |
| 5393 | 1 | 5   | 14 | 10 | 516.14   | 490.48   | 19.11  | o |
| 5394 | 1 | 6   | 14 | 10 | 2625.16  | 2442.84  | 92.36  | o |
| 5395 | 1 | 7   | 14 | 10 | 8.96     | 15.92    | 3.18   | o |
| 5396 | 1 | 8   | 14 | 10 | 1852.25  | 1605.20  | 79.62  | o |
| 5397 | 1 | 9   | 14 | 10 | 871.14   | 761.20   | 41.40  | o |
| 5398 | 1 | -10 | 15 | 10 | 396.84   | 468.18   | 28.66  | o |
| 5399 | 1 | -9  | 15 | 10 | 476.04   | 519.14   | 28.66  | o |
| 5400 | 1 | -8  | 15 | 10 | 488.82   | 433.15   | 19.11  | o |
| 5401 | 1 | -7  | 15 | 10 | 19.74    | 35.03    | 6.37   | o |
| 5402 | 1 | -6  | 15 | 10 | 427.13   | 353.53   | 19.11  | o |
| 5403 | 1 | -4  | 15 | 10 | 34.34    | 41.40    | 9.55   | o |
| 5404 | 1 | -3  | 15 | 10 | 141.93   | 146.51   | 9.55   | o |
| 5405 | 1 | -2  | 15 | 10 | 37.85    | 35.03    | 3.18   | o |
| 5406 | 1 | -1  | 15 | 10 | 1195.29  | 990.51   | 35.03  | o |
| 5407 | 1 | 1   | 15 | 10 | 363.72   | 410.86   | 15.92  | o |
| 5408 | 1 | 2   | 15 | 10 | 6.29     | 12.74    | 3.18   | o |
| 5409 | 1 | 3   | 15 | 10 | 819.89   | 656.09   | 28.66  | o |
| 5410 | 1 | 4   | 15 | 10 | 414.21   | 347.16   | 15.92  | o |
| 5411 | 1 | 5   | 15 | 10 | 236.11   | 210.21   | 15.92  | o |
| 5412 | 1 | 6   | 15 | 10 | 145.38   | 101.92   | 12.74  | o |
| 5413 | 1 | 7   | 15 | 10 | 10.51    | 35.03    | 6.37   | o |
| 5414 | 1 | 8   | 15 | 10 | 281.62   | 261.16   | 15.92  | o |
| 5415 | 1 | 9   | 15 | 10 | 511.52   | 458.63   | 35.03  | o |
| 5416 | 1 | -10 | 16 | 10 | 1220.92  | 1264.42  | 85.99  | o |
| 5417 | 1 | -9  | 16 | 10 | 213.13   | 203.84   | 15.92  | o |
| 5418 | 1 | -8  | 16 | 10 | 3.43     | 9.55     | 3.18   | o |
| 5419 | 1 | -7  | 16 | 10 | 1.31     | 9.55     | 3.18   | o |
| 5420 | 1 | -6  | 16 | 10 | 5.28     | 3.18     | 3.18   | < |
| 5421 | 1 | -5  | 16 | 10 | 1130.36  | 879.04   | 31.85  | o |
| 5422 | 1 | -4  | 16 | 10 | 73.76    | 57.33    | 6.37   | o |
| 5423 | 1 | -3  | 16 | 10 | 43.95    | 73.25    | 6.37   | o |
| 5424 | 1 | -2  | 16 | 10 | 2816.88  | 2872.80  | 92.36  | o |
| 5425 | 1 | -1  | 16 | 10 | 1514.27  | 1920.51  | 79.62  | o |
| 5426 | 1 | 0   | 16 | 10 | 10790.80 | 11873.40 | 417.23 | o |
| 5427 | 1 | 1   | 16 | 10 | 1410.11  | 1732.60  | 73.25  | o |

|      |   |    |    |    |         |         |        |   |
|------|---|----|----|----|---------|---------|--------|---|
| 5428 | 1 | 2  | 16 | 10 | 2821.74 | 2946.06 | 108.29 | o |
| 5429 | 1 | 3  | 16 | 10 | 71.27   | 114.66  | 9.55   | o |
| 5430 | 1 | 4  | 16 | 10 | 20.66   | 12.74   | 3.18   | o |
| 5431 | 1 | 5  | 16 | 10 | 523.67  | 449.08  | 321.68 | < |
| 5432 | 1 | 6  | 16 | 10 | 78.43   | 82.81   | 6.37   | o |
| 5433 | 1 | 7  | 16 | 10 | 14.82   | 25.48   | 3.18   | o |
| 5434 | 1 | 8  | 16 | 10 | 6.46    | 6.37    | 22.29  | < |
| 5435 | 1 | 9  | 16 | 10 | 117.86  | 124.21  | 19.11  | o |
| 5436 | 1 | -9 | 17 | 10 | 105.69  | 117.84  | 15.92  | o |
| 5437 | 1 | -8 | 17 | 10 | 1.04    | 12.74   | 6.37   | < |
| 5438 | 1 | -7 | 17 | 10 | 92.09   | 82.81   | 6.37   | o |
| 5439 | 1 | -6 | 17 | 10 | 34.93   | 38.22   | 3.18   | o |
| 5440 | 1 | -5 | 17 | 10 | 0.75    | 9.55    | 3.18   | o |
| 5441 | 1 | -4 | 17 | 10 | 91.80   | 89.18   | 6.37   | o |
| 5442 | 1 | -3 | 17 | 10 | 133.88  | 124.21  | 6.37   | o |
| 5443 | 1 | -2 | 17 | 10 | 426.48  | 340.79  | 15.92  | o |
| 5444 | 1 | -1 | 17 | 10 | 455.91  | 426.78  | 22.29  | o |
| 5445 | 1 | 1  | 17 | 10 | 598.43  | 557.36  | 22.29  | o |
| 5446 | 1 | 2  | 17 | 10 | 27.02   | 47.77   | 41.40  | < |
| 5447 | 1 | 3  | 17 | 10 | 65.50   | 60.51   | 6.37   | o |
| 5448 | 1 | 4  | 17 | 10 | 4.94    | 12.74   | 3.18   | o |
| 5449 | 1 | 5  | 17 | 10 | 93.00   | 82.81   | 6.37   | o |
| 5450 | 1 | 6  | 17 | 10 | 12.06   | 6.37    | 3.18   | < |
| 5451 | 1 | 7  | 17 | 10 | 142.85  | 117.84  | 9.55   | o |
| 5452 | 1 | 8  | 17 | 10 | 0.87    | 9.55    | 6.37   | < |
| 5453 | 1 | 9  | 17 | 10 | 75.51   | 44.59   | 15.92  | < |
| 5454 | 1 | -7 | 18 | 10 | 6.09    | 6.37    | 3.18   | < |
| 5455 | 1 | -5 | 18 | 10 | 16.54   | 15.92   | 3.18   | o |
| 5456 | 1 | -4 | 18 | 10 | 5636.56 | 4987.60 | 156.06 | o |
| 5457 | 1 | -2 | 18 | 10 | 630.94  | 566.92  | 25.48  | o |
| 5458 | 1 | -1 | 18 | 10 | 919.79  | 799.42  | 28.66  | o |
| 5459 | 1 | 0  | 18 | 10 | 532.38  | 442.70  | 22.29  | o |
| 5460 | 1 | 1  | 18 | 10 | 883.79  | 742.09  | 28.66  | o |
| 5461 | 1 | 2  | 18 | 10 | 1261.89 | 1044.66 | 35.03  | o |
| 5462 | 1 | 4  | 18 | 10 | 4945.53 | 4707.32 | 146.51 | o |
| 5463 | 1 | 5  | 18 | 10 | 73.32   | 44.59   | 6.37   | o |
| 5464 | 1 | 6  | 18 | 10 | 1328.14 | 952.29  | 41.40  | o |
| 5465 | 1 | 7  | 18 | 10 | 118.04  | 98.73   | 9.55   | o |
| 5466 | 1 | 8  | 18 | 10 | 2309.47 | 1608.39 | 159.25 | o |
| 5467 | 1 | -7 | 19 | 10 | 508.42  | 442.70  | 28.66  | o |
| 5468 | 1 | -6 | 19 | 10 | 5.29    | 12.74   | 3.18   | o |
| 5469 | 1 | -5 | 19 | 10 | 10.29   | 22.29   | 6.37   | o |
| 5470 | 1 | -4 | 19 | 10 | 16.83   | 15.92   | 3.18   | o |
| 5471 | 1 | -3 | 19 | 10 | 451.63  | 331.23  | 15.92  | o |
| 5472 | 1 | -2 | 19 | 10 | 14.46   | 28.66   | 6.37   | o |
| 5473 | 1 | -1 | 19 | 10 | 18.89   | 19.11   | 3.18   | o |
| 5474 | 1 | 0  | 19 | 10 | 15.29   | 9.55    | 3.18   | o |
| 5475 | 1 | 1  | 19 | 10 | 47.72   | 41.40   | 3.18   | o |
| 5476 | 1 | 2  | 19 | 10 | 174.05  | 140.14  | 9.55   | o |
| 5477 | 1 | 3  | 19 | 10 | 82.04   | 85.99   | 6.37   | o |
| 5478 | 1 | 4  | 19 | 10 | 0.27    | 3.18    | 3.18   | < |
| 5479 | 1 | 5  | 19 | 10 | 139.04  | 127.40  | 9.55   | o |
| 5480 | 1 | 7  | 19 | 10 | 399.31  | 414.04  | 38.22  | o |
| 5481 | 1 | 8  | 19 | 10 | 468.17  | 484.11  | 35.03  | o |
| 5482 | 1 | -6 | 20 | 10 | 1091.63 | 726.16  | 41.40  | o |
| 5483 | 1 | -5 | 20 | 10 | 195.54  | 216.57  | 15.92  | o |
| 5484 | 1 | -4 | 20 | 10 | 1035.92 | 767.57  | 35.03  | o |
| 5485 | 1 | -2 | 20 | 10 | 114.54  | 159.25  | 9.55   | o |

|      |   |     |    |    |         |         |        |   |
|------|---|-----|----|----|---------|---------|--------|---|
| 5486 | 1 | -1  | 20 | 10 | 30.03   | 54.14   | 6.37   | o |
| 5487 | 1 | 0   | 20 | 10 | 24.46   | 19.11   | 3.18   | o |
| 5488 | 1 | 2   | 20 | 10 | 89.39   | 95.55   | 6.37   | o |
| 5489 | 1 | 3   | 20 | 10 | 125.66  | 178.36  | 9.55   | o |
| 5490 | 1 | 4   | 20 | 10 | 1041.31 | 767.57  | 31.85  | o |
| 5491 | 1 | 5   | 20 | 10 | 292.21  | 293.01  | 19.11  | o |
| 5492 | 1 | 6   | 20 | 10 | 1252.63 | 1025.55 | 54.14  | o |
| 5493 | 1 | 8   | 20 | 10 | 63.92   | 85.99   | 22.29  | o |
| 5494 | 1 | -6  | 21 | 10 | 1.66    | -3.18   | 3.18   | < |
| 5495 | 1 | -5  | 21 | 10 | 102.35  | 70.07   | 9.55   | o |
| 5496 | 1 | -4  | 21 | 10 | 110.68  | 92.36   | 9.55   | o |
| 5497 | 1 | -3  | 21 | 10 | 51.14   | 25.48   | 6.37   | o |
| 5498 | 1 | -2  | 21 | 10 | 110.10  | 133.77  | 12.74  | o |
| 5499 | 1 | -1  | 21 | 10 | 438.93  | 429.96  | 19.11  | o |
| 5500 | 1 | 0   | 21 | 10 | 7.28    | 19.11   | 3.18   | o |
| 5501 | 1 | 1   | 21 | 10 | 707.37  | 573.29  | 22.29  | o |
| 5502 | 1 | 2   | 21 | 10 | 204.64  | 168.80  | 12.74  | o |
| 5503 | 1 | 3   | 21 | 10 | 40.41   | 35.03   | 6.37   | o |
| 5504 | 1 | 4   | 21 | 10 | 6.55    | -3.18   | 6.37   | < |
| 5505 | 1 | 5   | 21 | 10 | 290.56  | 289.83  | 25.48  | o |
| 5506 | 1 | 6   | 21 | 10 | 3.37    | 9.55    | 6.37   | < |
| 5507 | 1 | -5  | 22 | 10 | 94.41   | 66.88   | 9.55   | o |
| 5508 | 1 | -4  | 22 | 10 | 1275.77 | 917.26  | 47.77  | o |
| 5509 | 1 | -2  | 22 | 10 | 4683.00 | 4411.12 | 194.28 | o |
| 5510 | 1 | -1  | 22 | 10 | 20.01   | 47.77   | 6.37   | o |
| 5511 | 1 | 0   | 22 | 10 | 6054.15 | 6417.63 | 394.93 | o |
| 5512 | 1 | 1   | 22 | 10 | 23.54   | 54.14   | 12.74  | o |
| 5513 | 1 | -5  | 23 | 10 | 102.36  | 89.18   | 9.55   | o |
| 5514 | 1 | -4  | 23 | 10 | 0.63    | -3.18   | 6.37   | < |
| 5515 | 1 | -3  | 23 | 10 | 22.39   | 25.48   | 12.74  | < |
| 5516 | 1 | -2  | 23 | 10 | 180.30  | 152.88  | 19.11  | o |
| 5517 | 1 | -10 | 1  | 11 | 427.85  | 433.15  | 19.11  | o |
| 5518 | 1 | -9  | 1  | 11 | 996.36  | 1066.95 | 44.59  | o |
| 5519 | 1 | -8  | 1  | 11 | 5.49    | 12.74   | 3.18   | o |
| 5520 | 1 | -7  | 1  | 11 | 367.23  | 369.45  | 19.11  | o |
| 5521 | 1 | -6  | 1  | 11 | 14.26   | 22.29   | 3.18   | o |
| 5522 | 1 | -5  | 1  | 11 | 347.48  | 414.04  | 19.11  | o |
| 5523 | 1 | -4  | 1  | 11 | 925.56  | 866.30  | 35.03  | o |
| 5524 | 1 | -3  | 1  | 11 | 1425.43 | 1535.13 | 50.96  | o |
| 5525 | 1 | -2  | 1  | 11 | 6408.86 | 7134.24 | 219.76 | o |
| 5526 | 1 | -1  | 1  | 11 | 3750.75 | 3844.21 | 117.84 | o |
| 5527 | 1 | 1   | 1  | 11 | 3037.26 | 3038.42 | 95.55  | o |
| 5528 | 1 | 2   | 1  | 11 | 5442.94 | 5277.42 | 229.32 | o |
| 5529 | 1 | 3   | 1  | 11 | 2285.03 | 2219.89 | 70.07  | o |
| 5530 | 1 | 4   | 1  | 11 | 1666.05 | 1528.77 | 50.96  | o |
| 5531 | 1 | 5   | 1  | 11 | 496.87  | 442.70  | 19.11  | o |
| 5532 | 1 | 6   | 1  | 11 | 8.61    | 12.74   | 3.18   | o |
| 5533 | 1 | 7   | 1  | 11 | 173.85  | 159.25  | 31.85  | o |
| 5534 | 1 | 8   | 1  | 11 | 0.17    | 9.55    | 3.18   | o |
| 5535 | 1 | 9   | 1  | 11 | 1025.60 | 1114.72 | 38.22  | o |
| 5536 | 1 | 10  | 1  | 11 | 366.41  | 353.53  | 22.29  | o |
| 5537 | 1 | 11  | 1  | 11 | 217.77  | 270.72  | 15.92  | o |
| 5538 | 1 | -10 | 2  | 11 | 232.05  | 254.79  | 12.74  | o |
| 5539 | 1 | -9  | 2  | 11 | 84.52   | 105.10  | 6.37   | o |
| 5540 | 1 | -8  | 2  | 11 | 236.69  | 280.27  | 12.74  | o |
| 5541 | 1 | -7  | 2  | 11 | 564.04  | 668.84  | 25.48  | o |
| 5542 | 1 | -6  | 2  | 11 | 9.62    | 6.37    | 6.37   | < |
| 5543 | 1 | -5  | 2  | 11 | 98.09   | 111.47  | 9.55   | o |

|      |   |     |   |    |         |         |        |   |
|------|---|-----|---|----|---------|---------|--------|---|
| 5544 | 1 | -4  | 2 | 11 | 19.83   | 22.29   | 3.18   | o |
| 5545 | 1 | -3  | 2 | 11 | 208.63  | 219.76  | 12.74  | o |
| 5546 | 1 | -2  | 2 | 11 | 83.72   | 92.36   | 6.37   | o |
| 5547 | 1 | -1  | 2 | 11 | 270.80  | 270.72  | 12.74  | o |
| 5548 | 1 | 0   | 2 | 11 | 18.66   | 25.48   | 3.18   | o |
| 5549 | 1 | 1   | 2 | 11 | 261.01  | 232.50  | 12.74  | o |
| 5550 | 1 | 2   | 2 | 11 | 68.24   | 79.62   | 6.37   | o |
| 5551 | 1 | 3   | 2 | 11 | 172.11  | 156.06  | 9.55   | o |
| 5552 | 1 | 4   | 2 | 11 | 203.40  | 197.46  | 9.55   | o |
| 5553 | 1 | 5   | 2 | 11 | 11.76   | 3.18    | 3.18   | < |
| 5554 | 1 | 6   | 2 | 11 | 276.22  | 277.09  | 12.74  | o |
| 5555 | 1 | 7   | 2 | 11 | 105.96  | 114.66  | 89.18  | < |
| 5556 | 1 | 8   | 2 | 11 | 7.36    | 22.29   | 6.37   | o |
| 5557 | 1 | 9   | 2 | 11 | 244.94  | 248.42  | 12.74  | o |
| 5558 | 1 | 10  | 2 | 11 | 18.15   | 25.48   | 3.18   | o |
| 5559 | 1 | 11  | 2 | 11 | 112.20  | 117.84  | 9.55   | o |
| 5560 | 1 | -10 | 3 | 11 | 165.61  | 149.69  | 9.55   | o |
| 5561 | 1 | -9  | 3 | 11 | 884.03  | 968.22  | 35.03  | o |
| 5562 | 1 | -8  | 3 | 11 | 3232.47 | 3570.30 | 121.03 | o |
| 5563 | 1 | -6  | 3 | 11 | 289.74  | 308.94  | 19.11  | o |
| 5564 | 1 | -4  | 3 | 11 | 113.06  | 143.32  | 12.74  | o |
| 5565 | 1 | -3  | 3 | 11 | 530.77  | 519.14  | 19.11  | o |
| 5566 | 1 | -2  | 3 | 11 | 551.39  | 496.85  | 19.11  | o |
| 5567 | 1 | -1  | 3 | 11 | 609.40  | 659.28  | 25.48  | o |
| 5568 | 1 | 1   | 3 | 11 | 1065.69 | 961.85  | 54.14  | o |
| 5569 | 1 | 2   | 3 | 11 | 134.10  | 79.62   | 9.55   | o |
| 5570 | 1 | 3   | 3 | 11 | 62.17   | 25.48   | 63.70  | < |
| 5571 | 1 | 4   | 3 | 11 | 1002.76 | 993.70  | 35.03  | o |
| 5572 | 1 | 5   | 3 | 11 | 749.11  | 894.97  | 31.85  | o |
| 5573 | 1 | 6   | 3 | 11 | 44.13   | 50.96   | 9.55   | o |
| 5574 | 1 | 8   | 3 | 11 | 2824.29 | 3086.19 | 98.73  | o |
| 5575 | 1 | 9   | 3 | 11 | 620.84  | 770.75  | 35.03  | o |
| 5576 | 1 | 10  | 3 | 11 | 311.04  | 302.57  | 15.92  | o |
| 5577 | 1 | 11  | 3 | 11 | 151.74  | 200.65  | 12.74  | o |
| 5578 | 1 | -10 | 4 | 11 | 7.85    | 6.37    | 3.18   | < |
| 5579 | 1 | -9  | 4 | 11 | 23.70   | 19.11   | 3.18   | o |
| 5580 | 1 | -8  | 4 | 11 | 31.07   | 38.22   | 6.37   | o |
| 5581 | 1 | -7  | 4 | 11 | 19.82   | 22.29   | 3.18   | o |
| 5582 | 1 | -6  | 4 | 11 | 1.40    | 0.00    | 3.18   | < |
| 5583 | 1 | -5  | 4 | 11 | 67.51   | 79.62   | 9.55   | o |
| 5584 | 1 | -4  | 4 | 11 | 57.01   | 50.96   | 6.37   | o |
| 5585 | 1 | -3  | 4 | 11 | 10.67   | 6.37    | 3.18   | < |
| 5586 | 1 | -2  | 4 | 11 | 15.23   | 22.29   | 3.18   | o |
| 5587 | 1 | -1  | 4 | 11 | 54.76   | 50.96   | 6.37   | o |
| 5588 | 1 | 0   | 4 | 11 | 217.24  | 194.28  | 12.74  | o |
| 5589 | 1 | 1   | 4 | 11 | 51.21   | 60.51   | 6.37   | o |
| 5590 | 1 | 2   | 4 | 11 | 29.23   | 28.66   | 3.18   | o |
| 5591 | 1 | 3   | 4 | 11 | 2.35    | 3.18    | 6.37   | < |
| 5592 | 1 | 4   | 4 | 11 | 32.43   | 25.48   | 3.18   | o |
| 5593 | 1 | 5   | 4 | 11 | 10.80   | 6.37    | 54.14  | < |
| 5594 | 1 | 6   | 4 | 11 | 44.54   | 44.59   | 6.37   | o |
| 5595 | 1 | 7   | 4 | 11 | 32.92   | 35.03   | 3.18   | o |
| 5596 | 1 | 8   | 4 | 11 | 3.61    | 6.37    | 3.18   | < |
| 5597 | 1 | 9   | 4 | 11 | 24.88   | 28.66   | 6.37   | o |
| 5598 | 1 | 10  | 4 | 11 | 7.17    | 6.37    | 3.18   | < |
| 5599 | 1 | 11  | 4 | 11 | 25.41   | 25.48   | 6.37   | o |
| 5600 | 1 | -10 | 5 | 11 | 13.01   | 31.85   | 6.37   | o |
| 5601 | 1 | -9  | 5 | 11 | 640.87  | 719.79  | 28.66  | o |

|      |   |     |   |    |         |         |         |   |
|------|---|-----|---|----|---------|---------|---------|---|
| 5602 | 1 | -8  | 5 | 11 | 1847.52 | 1799.48 | 60.51   | o |
| 5603 | 1 | -7  | 5 | 11 | 462.82  | 579.66  | 22.29   | o |
| 5604 | 1 | -6  | 5 | 11 | 19.48   | 35.03   | 6.37    | o |
| 5605 | 1 | -5  | 5 | 11 | 811.60  | 968.22  | 38.22   | o |
| 5606 | 1 | -4  | 5 | 11 | 5222.22 | 6130.98 | 1152.94 | o |
| 5607 | 1 | -3  | 5 | 11 | 2997.46 | 3153.08 | 114.66  | o |
| 5608 | 1 | -2  | 5 | 11 | 451.00  | 461.81  | 22.29   | o |
| 5609 | 1 | -1  | 5 | 11 | 810.86  | 767.57  | 31.85   | o |
| 5610 | 1 | 0   | 5 | 11 | 31.85   | 44.59   | 6.37    | o |
| 5611 | 1 | 2   | 5 | 11 | 801.16  | 687.94  | 28.66   | o |
| 5612 | 1 | 3   | 5 | 11 | 2701.50 | 2602.09 | 82.81   | o |
| 5613 | 1 | 4   | 5 | 11 | 6205.33 | 6051.36 | 187.91  | o |
| 5614 | 1 | 5   | 5 | 11 | 469.20  | 480.92  | 54.14   | o |
| 5615 | 1 | 6   | 5 | 11 | 19.15   | 31.85   | 3.18    | o |
| 5616 | 1 | 7   | 5 | 11 | 307.93  | 407.67  | 19.11   | o |
| 5617 | 1 | 8   | 5 | 11 | 1287.66 | 1200.72 | 41.40   | o |
| 5618 | 1 | 9   | 5 | 11 | 739.45  | 802.60  | 28.66   | o |
| 5619 | 1 | 10  | 5 | 11 | 4.56    | 6.37    | 3.18    | < |
| 5620 | 1 | 11  | 5 | 11 | 36.49   | 60.51   | 6.37    | o |
| 5621 | 1 | -10 | 6 | 11 | 52.97   | 60.51   | 9.55    | o |
| 5622 | 1 | -9  | 6 | 11 | 66.34   | 63.70   | 6.37    | o |
| 5623 | 1 | -8  | 6 | 11 | 23.42   | 28.66   | 19.11   | < |
| 5624 | 1 | -7  | 6 | 11 | 80.11   | 85.99   | 6.37    | o |
| 5625 | 1 | -6  | 6 | 11 | 99.11   | 108.29  | 9.55    | o |
| 5626 | 1 | -5  | 6 | 11 | 28.19   | 44.59   | 6.37    | o |
| 5627 | 1 | -4  | 6 | 11 | 0.62    | 3.18    | 15.92   | < |
| 5628 | 1 | -3  | 6 | 11 | 86.09   | 85.99   | 6.37    | o |
| 5629 | 1 | -2  | 6 | 11 | 1.74    | 3.18    | 3.18    | < |
| 5630 | 1 | -1  | 6 | 11 | 130.65  | 127.40  | 9.55    | o |
| 5631 | 1 | 0   | 6 | 11 | 176.36  | 165.62  | 9.55    | o |
| 5632 | 1 | 1   | 6 | 11 | 13.42   | 9.55    | 9.55    | < |
| 5633 | 1 | 2   | 6 | 11 | 16.36   | 19.11   | 3.18    | o |
| 5634 | 1 | 3   | 6 | 11 | 7.63    | 9.55    | 3.18    | o |
| 5635 | 1 | 4   | 6 | 11 | 66.71   | 73.25   | 6.37    | o |
| 5636 | 1 | 5   | 6 | 11 | 9.19    | 6.37    | 3.18    | < |
| 5637 | 1 | 6   | 6 | 11 | 31.25   | 35.03   | 3.18    | o |
| 5638 | 1 | 7   | 6 | 11 | 0.00    | 3.18    | 6.37    | < |
| 5639 | 1 | 8   | 6 | 11 | 2.91    | 6.37    | 3.18    | < |
| 5640 | 1 | 9   | 6 | 11 | 167.35  | 178.36  | 12.74   | o |
| 5641 | 1 | 10  | 6 | 11 | 0.13    | 3.18    | 3.18    | < |
| 5642 | 1 | 11  | 6 | 11 | 48.26   | 60.51   | 6.37    | o |
| 5643 | 1 | -10 | 7 | 11 | 9.64    | 6.37    | 3.18    | < |
| 5644 | 1 | -9  | 7 | 11 | 36.02   | 60.51   | 6.37    | o |
| 5645 | 1 | -8  | 7 | 11 | 133.09  | 117.84  | 6.37    | o |
| 5646 | 1 | -7  | 7 | 11 | 1393.60 | 1175.24 | 47.77   | o |
| 5647 | 1 | -6  | 7 | 11 | 300.43  | 321.68  | 15.92   | o |
| 5648 | 1 | -4  | 7 | 11 | 5874.46 | 6506.81 | 200.65  | o |
| 5649 | 1 | -3  | 7 | 11 | 606.45  | 579.66  | 22.29   | o |
| 5650 | 1 | -2  | 7 | 11 | 727.74  | 773.94  | 31.85   | o |
| 5651 | 1 | 0   | 7 | 11 | 123.58  | 124.21  | 6.37    | o |
| 5652 | 1 | 1   | 7 | 11 | 1847.52 | 1895.03 | 60.51   | o |
| 5653 | 1 | 2   | 7 | 11 | 41.41   | 25.48   | 105.10  | < |
| 5654 | 1 | 3   | 7 | 11 | 970.56  | 990.51  | 35.03   | o |
| 5655 | 1 | 4   | 7 | 11 | 4864.55 | 4503.49 | 140.14  | o |
| 5656 | 1 | 5   | 7 | 11 | 97.75   | 149.69  | 9.55    | o |
| 5657 | 1 | 6   | 7 | 11 | 84.59   | 98.73   | 9.55    | o |
| 5658 | 1 | 7   | 7 | 11 | 1556.71 | 1557.43 | 54.14   | o |
| 5659 | 1 | 8   | 7 | 11 | 54.87   | 57.33   | 6.37    | o |



|      |   |     |    |    |         |         |       |   |
|------|---|-----|----|----|---------|---------|-------|---|
| 5660 | 1 | 9   | 7  | 11 | 24.51   | 47.77   | 6.37  | o |
| 5661 | 1 | 10  | 7  | 11 | 1.72    | 3.18    | 3.18  | < |
| 5662 | 1 | 11  | 7  | 11 | 37.96   | 79.62   | 9.55  | o |
| 5663 | 1 | -10 | 8  | 11 | 111.95  | 133.77  | 12.74 | o |
| 5664 | 1 | -9  | 8  | 11 | 105.31  | 101.92  | 6.37  | o |
| 5665 | 1 | -8  | 8  | 11 | 7.77    | 6.37    | 3.18  | < |
| 5666 | 1 | -7  | 8  | 11 | 11.50   | 12.74   | 22.29 | < |
| 5667 | 1 | -6  | 8  | 11 | 140.19  | 140.14  | 9.55  | o |
| 5668 | 1 | -5  | 8  | 11 | 36.56   | 57.33   | 6.37  | o |
| 5669 | 1 | -4  | 8  | 11 | 17.54   | 19.11   | 3.18  | o |
| 5670 | 1 | -3  | 8  | 11 | 234.15  | 235.68  | 12.74 | o |
| 5671 | 1 | -2  | 8  | 11 | 145.74  | 114.66  | 9.55  | o |
| 5672 | 1 | 0   | 8  | 11 | 494.80  | 442.70  | 19.11 | o |
| 5673 | 1 | 1   | 8  | 11 | 16.11   | 15.92   | 12.74 | < |
| 5674 | 1 | 2   | 8  | 11 | 4.16    | 6.37    | 3.18  | < |
| 5675 | 1 | 3   | 8  | 11 | 6.72    | 3.18    | 31.85 | < |
| 5676 | 1 | 4   | 8  | 11 | 7.18    | 6.37    | 6.37  | < |
| 5677 | 1 | 5   | 8  | 11 | 9.60    | 15.92   | 3.18  | o |
| 5678 | 1 | 6   | 8  | 11 | 3.12    | 3.18    | 6.37  | < |
| 5679 | 1 | 7   | 8  | 11 | 125.00  | 114.66  | 9.55  | o |
| 5680 | 1 | 8   | 8  | 11 | 103.40  | 114.66  | 9.55  | o |
| 5681 | 1 | 9   | 8  | 11 | 6.96    | 15.92   | 3.18  | o |
| 5682 | 1 | 10  | 8  | 11 | 19.86   | 25.48   | 3.18  | o |
| 5683 | 1 | 11  | 8  | 11 | 23.97   | 19.11   | 6.37  | o |
| 5684 | 1 | -10 | 9  | 11 | 409.39  | 379.01  | 22.29 | o |
| 5685 | 1 | -9  | 9  | 11 | 522.75  | 503.22  | 19.11 | o |
| 5686 | 1 | -8  | 9  | 11 | 20.89   | 31.85   | 3.18  | o |
| 5687 | 1 | -7  | 9  | 11 | 439.99  | 379.01  | 19.11 | o |
| 5688 | 1 | -6  | 9  | 11 | 26.03   | 28.66   | 6.37  | o |
| 5689 | 1 | -4  | 9  | 11 | 77.02   | 63.70   | 15.92 | o |
| 5690 | 1 | -3  | 9  | 11 | 545.01  | 455.45  | 19.11 | o |
| 5691 | 1 | -2  | 9  | 11 | 1153.03 | 1098.80 | 38.22 | o |
| 5692 | 1 | 0   | 9  | 11 | 2.42    | 12.74   | 28.66 | < |
| 5693 | 1 | 1   | 9  | 11 | 106.48  | 165.62  | 9.55  | o |
| 5694 | 1 | 2   | 9  | 11 | 1413.03 | 1385.44 | 44.59 | o |
| 5695 | 1 | 3   | 9  | 11 | 408.89  | 331.23  | 15.92 | o |
| 5696 | 1 | 4   | 9  | 11 | 332.17  | 296.20  | 12.74 | o |
| 5697 | 1 | 6   | 9  | 11 | 2.22    | 28.66   | 6.37  | o |
| 5698 | 1 | 7   | 9  | 11 | 363.54  | 353.53  | 22.29 | o |
| 5699 | 1 | 8   | 9  | 11 | 21.26   | 15.92   | 3.18  | o |
| 5700 | 1 | 9   | 9  | 11 | 556.75  | 624.25  | 25.48 | o |
| 5701 | 1 | 10  | 9  | 11 | 482.29  | 382.19  | 19.11 | o |
| 5702 | 1 | 11  | 9  | 11 | 6.29    | 57.33   | 12.74 | o |
| 5703 | 1 | -10 | 10 | 11 | 118.47  | 124.21  | 12.74 | o |
| 5704 | 1 | -9  | 10 | 11 | 40.67   | 47.77   | 6.37  | o |
| 5705 | 1 | -8  | 10 | 11 | 39.29   | 35.03   | 6.37  | o |
| 5706 | 1 | -7  | 10 | 11 | 168.72  | 143.32  | 9.55  | o |
| 5707 | 1 | -6  | 10 | 11 | 203.29  | 162.43  | 9.55  | o |
| 5708 | 1 | -5  | 10 | 11 | 0.02    | 0.00    | 3.18  | < |
| 5709 | 1 | -4  | 10 | 11 | 59.20   | 54.14   | 19.11 | < |
| 5710 | 1 | -3  | 10 | 11 | 86.36   | 95.55   | 6.37  | o |
| 5711 | 1 | -2  | 10 | 11 | 235.57  | 226.13  | 12.74 | o |
| 5712 | 1 | 0   | 10 | 11 | 367.07  | 363.08  | 19.11 | o |
| 5713 | 1 | 2   | 10 | 11 | 199.18  | 168.80  | 9.55  | o |
| 5714 | 1 | 3   | 10 | 11 | 32.95   | 50.96   | 6.37  | o |
| 5715 | 1 | 4   | 10 | 11 | 134.78  | 121.03  | 6.37  | o |
| 5716 | 1 | 5   | 10 | 11 | 24.97   | 28.66   | 3.18  | o |
| 5717 | 1 | 6   | 10 | 11 | 161.38  | 165.62  | 9.55  | o |

|      |   |     |    |    |         |         |        |   |
|------|---|-----|----|----|---------|---------|--------|---|
| 5718 | 1 | 7   | 10 | 11 | 310.61  | 280.27  | 12.74  | o |
| 5719 | 1 | 8   | 10 | 11 | 10.22   | 9.55    | 3.18   | o |
| 5720 | 1 | 9   | 10 | 11 | 0.02    | 6.37    | 3.18   | < |
| 5721 | 1 | 10  | 10 | 11 | 151.62  | 136.95  | 9.55   | o |
| 5722 | 1 | -10 | 11 | 11 | 1938.94 | 1786.74 | 85.99  | o |
| 5723 | 1 | -9  | 11 | 11 | 955.90  | 850.38  | 44.59  | o |
| 5724 | 1 | -8  | 11 | 11 | 389.95  | 286.64  | 15.92  | o |
| 5725 | 1 | -7  | 11 | 11 | 567.11  | 566.92  | 25.48  | o |
| 5726 | 1 | -6  | 11 | 11 | 797.69  | 665.65  | 28.66  | o |
| 5727 | 1 | -5  | 11 | 11 | 520.19  | 515.96  | 19.11  | o |
| 5728 | 1 | -4  | 11 | 11 | 1925.26 | 1821.78 | 60.51  | o |
| 5729 | 1 | -3  | 11 | 11 | 865.16  | 824.90  | 28.66  | o |
| 5730 | 1 | -2  | 11 | 11 | 5574.38 | 6322.08 | 194.28 | o |
| 5731 | 1 | 1   | 11 | 11 | 392.04  | 468.18  | 19.11  | o |
| 5732 | 1 | 2   | 11 | 11 | 8314.17 | 8392.28 | 257.98 | o |
| 5733 | 1 | 3   | 11 | 11 | 308.80  | 535.07  | 70.07  | o |
| 5734 | 1 | 4   | 11 | 11 | 1895.47 | 1716.68 | 57.33  | o |
| 5735 | 1 | 5   | 11 | 11 | 260.25  | 277.09  | 57.33  | o |
| 5736 | 1 | 6   | 11 | 11 | 250.31  | 203.84  | 15.92  | o |
| 5737 | 1 | 7   | 11 | 11 | 498.11  | 449.08  | 19.11  | o |
| 5738 | 1 | 8   | 11 | 11 | 318.54  | 277.09  | 15.92  | o |
| 5739 | 1 | 9   | 11 | 11 | 1131.77 | 1076.51 | 41.40  | o |
| 5740 | 1 | 10  | 11 | 11 | 1769.22 | 1401.37 | 70.07  | o |
| 5741 | 1 | -10 | 12 | 11 | 104.57  | 114.66  | 9.55   | o |
| 5742 | 1 | -9  | 12 | 11 | 182.49  | 191.10  | 15.92  | o |
| 5743 | 1 | -8  | 12 | 11 | 51.35   | 38.22   | 6.37   | o |
| 5744 | 1 | -7  | 12 | 11 | 47.45   | 66.88   | 6.37   | o |
| 5745 | 1 | -6  | 12 | 11 | 24.72   | 19.11   | 6.37   | o |
| 5746 | 1 | -5  | 12 | 11 | 138.20  | 124.21  | 6.37   | o |
| 5747 | 1 | -4  | 12 | 11 | 245.87  | 226.13  | 12.74  | o |
| 5748 | 1 | -3  | 12 | 11 | 195.73  | 187.91  | 9.55   | o |
| 5749 | 1 | -2  | 12 | 11 | 26.22   | 44.59   | 6.37   | o |
| 5750 | 1 | -1  | 12 | 11 | 0.85    | 3.18    | 3.18   | < |
| 5751 | 1 | 0   | 12 | 11 | 110.93  | 98.73   | 6.37   | o |
| 5752 | 1 | 1   | 12 | 11 | 4.37    | 9.55    | 3.18   | o |
| 5753 | 1 | 2   | 12 | 11 | 394.33  | 356.71  | 15.92  | o |
| 5754 | 1 | 3   | 12 | 11 | 16.69   | 22.29   | 6.37   | o |
| 5755 | 1 | 4   | 12 | 11 | 33.03   | 35.03   | 57.33  | < |
| 5756 | 1 | 5   | 12 | 11 | 4.84    | 15.92   | 28.66  | < |
| 5757 | 1 | 6   | 12 | 11 | 181.56  | 162.43  | 9.55   | o |
| 5758 | 1 | 7   | 12 | 11 | 63.08   | 63.70   | 6.37   | o |
| 5759 | 1 | 8   | 12 | 11 | 32.77   | 22.29   | 3.18   | o |
| 5760 | 1 | 9   | 12 | 11 | 6.22    | 6.37    | 6.37   | < |
| 5761 | 1 | -10 | 13 | 11 | 4.87    | 19.11   | 6.37   | o |
| 5762 | 1 | -9  | 13 | 11 | 392.12  | 407.67  | 25.48  | o |
| 5763 | 1 | -8  | 13 | 11 | 40.29   | 38.22   | 6.37   | o |
| 5764 | 1 | -7  | 13 | 11 | 310.89  | 257.98  | 12.74  | o |
| 5765 | 1 | -6  | 13 | 11 | 53.15   | 35.03   | 3.18   | o |
| 5766 | 1 | -3  | 13 | 11 | 628.01  | 515.96  | 25.48  | o |
| 5767 | 1 | -2  | 13 | 11 | 2499.40 | 2420.54 | 76.44  | o |
| 5768 | 1 | -1  | 13 | 11 | 2309.07 | 2270.85 | 73.25  | o |
| 5769 | 1 | 0   | 13 | 11 | 74.93   | 101.92  | 6.37   | o |
| 5770 | 1 | 1   | 13 | 11 | 1199.97 | 1264.42 | 44.59  | o |
| 5771 | 1 | 2   | 13 | 11 | 1057.99 | 1000.07 | 35.03  | o |
| 5772 | 1 | 3   | 13 | 11 | 1287.36 | 1168.87 | 44.59  | o |
| 5773 | 1 | 4   | 13 | 11 | 11.38   | 12.74   | 3.18   | o |
| 5774 | 1 | 6   | 13 | 11 | 7.80    | 19.11   | 6.37   | o |
| 5775 | 1 | 7   | 13 | 11 | 424.79  | 385.38  | 15.92  | o |

|      |   |     |    |    |         |         |        |   |
|------|---|-----|----|----|---------|---------|--------|---|
| 5776 | 1 | 8   | 13 | 11 | 99.77   | 92.36   | 9.55   | o |
| 5777 | 1 | 9   | 13 | 11 | 261.82  | 267.53  | 19.11  | o |
| 5778 | 1 | -10 | 14 | 11 | 20.85   | 25.48   | 6.37   | o |
| 5779 | 1 | -9  | 14 | 11 | 304.64  | 350.34  | 22.29  | o |
| 5780 | 1 | -8  | 14 | 11 | 113.58  | 130.58  | 9.55   | o |
| 5781 | 1 | -7  | 14 | 11 | 86.40   | 89.18   | 6.37   | o |
| 5782 | 1 | -6  | 14 | 11 | 34.45   | 35.03   | 3.18   | o |
| 5783 | 1 | -5  | 14 | 11 | 48.73   | 38.22   | 6.37   | o |
| 5784 | 1 | -4  | 14 | 11 | 204.21  | 165.62  | 9.55   | o |
| 5785 | 1 | -2  | 14 | 11 | 650.65  | 566.92  | 25.48  | o |
| 5786 | 1 | -1  | 14 | 11 | 489.69  | 423.60  | 19.11  | o |
| 5787 | 1 | 0   | 14 | 11 | 55.04   | 47.77   | 6.37   | o |
| 5788 | 1 | 1   | 14 | 11 | 178.50  | 175.17  | 12.74  | o |
| 5789 | 1 | 2   | 14 | 11 | 307.77  | 257.98  | 15.92  | o |
| 5790 | 1 | 3   | 14 | 11 | 16.95   | 47.77   | 6.37   | o |
| 5791 | 1 | 4   | 14 | 11 | 25.60   | 15.92   | 15.92  | < |
| 5792 | 1 | 5   | 14 | 11 | 0.10    | 6.37    | 3.18   | < |
| 5793 | 1 | 6   | 14 | 11 | 39.48   | 38.22   | 6.37   | o |
| 5794 | 1 | 7   | 14 | 11 | 91.52   | 105.10  | 9.55   | o |
| 5795 | 1 | 8   | 14 | 11 | 190.57  | 213.39  | 15.92  | o |
| 5796 | 1 | 9   | 14 | 11 | 180.08  | 152.88  | 15.92  | o |
| 5797 | 1 | -9  | 15 | 11 | 224.24  | 267.53  | 25.48  | o |
| 5798 | 1 | -8  | 15 | 11 | 3575.15 | 3130.78 | 140.14 | o |
| 5799 | 1 | -6  | 15 | 11 | 95.68   | 85.99   | 6.37   | o |
| 5800 | 1 | -5  | 15 | 11 | 214.90  | 302.57  | 12.74  | o |
| 5801 | 1 | -4  | 15 | 11 | 1875.27 | 1595.65 | 54.14  | o |
| 5802 | 1 | -3  | 15 | 11 | 1043.19 | 977.77  | 41.40  | o |
| 5803 | 1 | -2  | 15 | 11 | 1167.80 | 1076.51 | 44.59  | o |
| 5804 | 1 | -1  | 15 | 11 | 414.10  | 324.86  | 15.92  | o |
| 5805 | 1 | 1   | 15 | 11 | 195.16  | 197.46  | 9.55   | o |
| 5806 | 1 | 2   | 15 | 11 | 1392.94 | 1388.63 | 54.14  | o |
| 5807 | 1 | 3   | 15 | 11 | 1305.48 | 1025.55 | 35.03  | o |
| 5808 | 1 | 4   | 15 | 11 | 1808.92 | 1407.74 | 54.14  | o |
| 5809 | 1 | 5   | 15 | 11 | 65.02   | 108.29  | 9.55   | o |
| 5810 | 1 | 6   | 15 | 11 | 58.97   | 50.96   | 6.37   | o |
| 5811 | 1 | 8   | 15 | 11 | 3008.21 | 3159.45 | 165.62 | o |
| 5812 | 1 | 9   | 15 | 11 | 173.67  | 293.01  | 25.48  | o |
| 5813 | 1 | -8  | 16 | 11 | 57.41   | 57.33   | 9.55   | o |
| 5814 | 1 | -7  | 16 | 11 | 3.25    | 0.00    | 9.55   | < |
| 5815 | 1 | -6  | 16 | 11 | 43.09   | 54.14   | 6.37   | o |
| 5816 | 1 | -5  | 16 | 11 | 13.40   | 15.92   | 9.55   | < |
| 5817 | 1 | -4  | 16 | 11 | 18.66   | 22.29   | 3.18   | o |
| 5818 | 1 | -3  | 16 | 11 | 234.82  | 184.73  | 9.55   | o |
| 5819 | 1 | -2  | 16 | 11 | 73.71   | 76.44   | 6.37   | o |
| 5820 | 1 | 0   | 16 | 11 | 1792.63 | 1802.67 | 60.51  | o |
| 5821 | 1 | 1   | 16 | 11 | 60.62   | 117.84  | 9.55   | o |
| 5822 | 1 | 2   | 16 | 11 | 90.84   | 82.81   | 6.37   | o |
| 5823 | 1 | 3   | 16 | 11 | 169.67  | 136.95  | 9.55   | o |
| 5824 | 1 | 4   | 16 | 11 | 69.81   | 76.44   | 6.37   | o |
| 5825 | 1 | 5   | 16 | 11 | 133.73  | 111.47  | 6.37   | o |
| 5826 | 1 | 6   | 16 | 11 | 23.22   | 22.29   | 6.37   | o |
| 5827 | 1 | 7   | 16 | 11 | 135.87  | 127.40  | 15.92  | o |
| 5828 | 1 | 8   | 16 | 11 | 19.84   | 12.74   | 6.37   | < |
| 5829 | 1 | -6  | 17 | 11 | 136.45  | 133.77  | 9.55   | o |
| 5830 | 1 | -5  | 17 | 11 | 687.39  | 547.81  | 25.48  | o |
| 5831 | 1 | -4  | 17 | 11 | 745.60  | 503.22  | 28.66  | o |
| 5832 | 1 | -3  | 17 | 11 | 1286.80 | 1258.05 | 44.59  | o |
| 5833 | 1 | -2  | 17 | 11 | 1792.33 | 1547.87 | 50.96  | o |

|      |   |     |    |    |         |         |        |   |
|------|---|-----|----|----|---------|---------|--------|---|
| 5834 | 1 | -1  | 17 | 11 | 277.42  | 232.50  | 15.92  | o |
| 5835 | 1 | 0   | 17 | 11 | 62.11   | 73.25   | 6.37   | o |
| 5836 | 1 | 1   | 17 | 11 | 958.29  | 831.27  | 28.66  | o |
| 5837 | 1 | 2   | 17 | 11 | 1250.98 | 1117.91 | 38.22  | o |
| 5838 | 1 | 3   | 17 | 11 | 658.08  | 586.03  | 22.29  | o |
| 5839 | 1 | 4   | 17 | 11 | 2205.16 | 1895.03 | 60.51  | o |
| 5840 | 1 | 5   | 17 | 11 | 1053.69 | 828.08  | 38.22  | o |
| 5841 | 1 | 6   | 17 | 11 | 108.48  | 117.84  | 12.74  | o |
| 5842 | 1 | 8   | 17 | 11 | 4066.27 | 4175.44 | 216.57 | o |
| 5843 | 1 | -6  | 18 | 11 | 25.20   | 19.11   | 6.37   | o |
| 5844 | 1 | -5  | 18 | 11 | 4.60    | 6.37    | 3.18   | < |
| 5845 | 1 | -4  | 18 | 11 | 90.38   | 70.07   | 6.37   | o |
| 5846 | 1 | -3  | 18 | 11 | 2.23    | 9.55    | 3.18   | o |
| 5847 | 1 | -2  | 18 | 11 | 46.11   | 50.96   | 6.37   | o |
| 5848 | 1 | -1  | 18 | 11 | 147.09  | 140.14  | 9.55   | o |
| 5849 | 1 | 0   | 18 | 11 | 131.15  | 108.29  | 6.37   | o |
| 5850 | 1 | 1   | 18 | 11 | 97.24   | 85.99   | 6.37   | o |
| 5851 | 1 | 2   | 18 | 11 | 37.10   | 38.22   | 3.18   | o |
| 5852 | 1 | 3   | 18 | 11 | 9.83    | 28.66   | 3.18   | o |
| 5853 | 1 | 4   | 18 | 11 | 200.48  | 162.43  | 9.55   | o |
| 5854 | 1 | 5   | 18 | 11 | 0.03    | 6.37    | 6.37   | < |
| 5855 | 1 | 6   | 18 | 11 | 0.21    | 0.00    | 6.37   | < |
| 5856 | 1 | 7   | 18 | 11 | 51.15   | 28.66   | 9.55   | < |
| 5857 | 1 | 8   | 18 | 11 | 11.40   | 25.48   | 9.55   | < |
| 5858 | 1 | -6  | 19 | 11 | 65.14   | 76.44   | 12.74  | o |
| 5859 | 1 | -5  | 19 | 11 | 187.85  | 184.73  | 15.92  | o |
| 5860 | 1 | -4  | 19 | 11 | 228.06  | 191.10  | 12.74  | o |
| 5861 | 1 | -3  | 19 | 11 | 39.85   | 44.59   | 6.37   | o |
| 5862 | 1 | -2  | 19 | 11 | 369.58  | 277.09  | 12.74  | o |
| 5863 | 1 | -1  | 19 | 11 | 154.09  | 168.80  | 9.55   | o |
| 5864 | 1 | 0   | 19 | 11 | 56.28   | 44.59   | 6.37   | o |
| 5865 | 1 | 2   | 19 | 11 | 294.37  | 238.87  | 12.74  | o |
| 5866 | 1 | 4   | 19 | 11 | 169.13  | 127.40  | 12.74  | o |
| 5867 | 1 | 5   | 19 | 11 | 157.62  | 133.77  | 15.92  | o |
| 5868 | 1 | 6   | 19 | 11 | 16.21   | 89.18   | 12.74  | o |
| 5869 | 1 | 7   | 19 | 11 | 3.50    | 38.22   | 15.92  | < |
| 5870 | 1 | -6  | 20 | 11 | 148.59  | 121.03  | 12.74  | o |
| 5871 | 1 | -5  | 20 | 11 | 62.06   | 70.07   | 9.55   | o |
| 5872 | 1 | -4  | 20 | 11 | 90.83   | 79.62   | 9.55   | o |
| 5873 | 1 | -3  | 20 | 11 | 0.99    | 3.18    | 3.18   | < |
| 5874 | 1 | -2  | 20 | 11 | 174.21  | 136.95  | 12.74  | o |
| 5875 | 1 | -1  | 20 | 11 | 21.44   | 31.85   | 3.18   | o |
| 5876 | 1 | 0   | 20 | 11 | 442.47  | 379.01  | 19.11  | o |
| 5877 | 1 | 1   | 20 | 11 | 12.09   | 31.85   | 6.37   | o |
| 5878 | 1 | 2   | 20 | 11 | 49.13   | 50.96   | 22.29  | < |
| 5879 | 1 | 3   | 20 | 11 | 1.26    | 6.37    | 3.18   | < |
| 5880 | 1 | 4   | 20 | 11 | 0.30    | 6.37    | 6.37   | < |
| 5881 | 1 | -5  | 21 | 11 | 4.00    | 9.55    | 6.37   | < |
| 5882 | 1 | -4  | 21 | 11 | 113.89  | 101.92  | 9.55   | o |
| 5883 | 1 | -3  | 21 | 11 | 516.47  | 455.45  | 28.66  | o |
| 5884 | 1 | 0   | 21 | 11 | 26.00   | 63.70   | 12.74  | o |
| 5885 | 1 | -5  | 22 | 11 | 49.24   | 28.66   | 9.55   | < |
| 5886 | 1 | -4  | 22 | 11 | 36.27   | 19.11   | 6.37   | o |
| 5887 | 1 | -3  | 22 | 11 | 4.41    | 41.40   | 12.74  | o |
| 5888 | 1 | -10 | 0  | 12 | 46.55   | 28.66   | 12.74  | < |
| 5889 | 1 | -9  | 0  | 12 | 1860.74 | 1914.14 | 105.10 | o |
| 5890 | 1 | -8  | 0  | 12 | 636.93  | 748.46  | 41.40  | o |
| 5891 | 1 | -7  | 0  | 12 | 1337.20 | 1920.51 | 89.18  | o |

|      |   |     |   |    |          |          |         |   |
|------|---|-----|---|----|----------|----------|---------|---|
| 5892 | 1 | -6  | 0 | 12 | 15045.70 | 19211.50 | 1165.68 | o |
| 5893 | 1 | -4  | 0 | 12 | 3333.79  | 3694.52  | 165.62  | o |
| 5894 | 1 | -3  | 0 | 12 | 8.72     | 31.85    | 6.37    | o |
| 5895 | 1 | -2  | 0 | 12 | 2554.05  | 2767.70  | 124.21  | o |
| 5896 | 1 | -1  | 0 | 12 | 5975.35  | 6143.72  | 267.53  | o |
| 5897 | 1 | 0   | 0 | 12 | 13411.00 | 14109.20 | 605.14  | o |
| 5898 | 1 | 1   | 0 | 12 | 6750.61  | 6605.54  | 286.64  | o |
| 5899 | 1 | 2   | 0 | 12 | 1008.48  | 920.44   | 44.59   | o |
| 5900 | 1 | 3   | 0 | 12 | 200.04   | 264.35   | 15.92   | o |
| 5901 | 1 | 4   | 0 | 12 | 3528.22  | 3293.21  | 146.51  | o |
| 5902 | 1 | 6   | 0 | 12 | 10517.80 | 11309.70 | 487.29  | o |
| 5903 | 1 | 7   | 0 | 12 | 1392.87  | 1815.41  | 85.99   | o |
| 5904 | 1 | 8   | 0 | 12 | 1593.95  | 1818.59  | 121.03  | o |
| 5905 | 1 | 9   | 0 | 12 | 1489.64  | 1573.35  | 105.10  | o |
| 5906 | 1 | 10  | 0 | 12 | 32.15    | 38.22    | 6.37    | o |
| 5907 | 1 | 11  | 0 | 12 | 535.34   | 621.06   | 35.03   | o |
| 5908 | 1 | -10 | 1 | 12 | 202.78   | 200.65   | 19.11   | o |
| 5909 | 1 | -9  | 1 | 12 | 240.12   | 289.83   | 15.92   | o |
| 5910 | 1 | -8  | 1 | 12 | 41.28    | 50.96    | 6.37    | o |
| 5911 | 1 | -7  | 1 | 12 | 28.41    | 38.22    | 6.37    | o |
| 5912 | 1 | -6  | 1 | 12 | 27.89    | 47.77    | 6.37    | o |
| 5913 | 1 | -5  | 1 | 12 | 949.93   | 1019.18  | 35.03   | o |
| 5914 | 1 | -4  | 1 | 12 | 134.74   | 152.88   | 9.55    | o |
| 5915 | 1 | -3  | 1 | 12 | 154.34   | 159.25   | 9.55    | o |
| 5916 | 1 | -2  | 1 | 12 | 249.02   | 226.13   | 9.55    | o |
| 5917 | 1 | -1  | 1 | 12 | 1356.22  | 1449.14  | 47.77   | o |
| 5918 | 1 | 0   | 1 | 12 | 118.16   | 130.58   | 6.37    | o |
| 5919 | 1 | 1   | 1 | 12 | 621.71   | 563.73   | 22.29   | o |
| 5920 | 1 | 2   | 1 | 12 | 409.23   | 337.60   | 15.92   | o |
| 5921 | 1 | 3   | 1 | 12 | 304.06   | 286.64   | 12.74   | o |
| 5922 | 1 | 4   | 1 | 12 | 49.13    | 63.70    | 6.37    | o |
| 5923 | 1 | 5   | 1 | 12 | 884.21   | 885.41   | 31.85   | o |
| 5924 | 1 | 6   | 1 | 12 | 37.94    | 54.14    | 6.37    | o |
| 5925 | 1 | 7   | 1 | 12 | 95.86    | 92.36    | 6.37    | o |
| 5926 | 1 | 8   | 1 | 12 | 1.86     | 6.37     | 3.18    | < |
| 5927 | 1 | 9   | 1 | 12 | 218.94   | 245.24   | 15.92   | o |
| 5928 | 1 | 10  | 1 | 12 | 19.99    | 19.11    | 3.18    | o |
| 5929 | 1 | 11  | 1 | 12 | 15.17    | 12.74    | 3.18    | o |
| 5930 | 1 | -10 | 2 | 12 | 1128.42  | 1082.88  | 54.14   | o |
| 5931 | 1 | -9  | 2 | 12 | 401.58   | 487.29   | 19.11   | o |
| 5932 | 1 | -8  | 2 | 12 | 208.00   | 261.16   | 15.92   | o |
| 5933 | 1 | -6  | 2 | 12 | 325.26   | 328.05   | 15.92   | o |
| 5934 | 1 | -5  | 2 | 12 | 11.91    | 25.48    | 12.74   | < |
| 5935 | 1 | -4  | 2 | 12 | 516.22   | 503.22   | 19.11   | o |
| 5936 | 1 | -2  | 2 | 12 | 2599.27  | 2847.32  | 89.18   | o |
| 5937 | 1 | -1  | 2 | 12 | 156.31   | 121.03   | 6.37    | o |
| 5938 | 1 | 0   | 2 | 12 | 325.94   | 312.12   | 12.74   | o |
| 5939 | 1 | 1   | 2 | 12 | 30.07    | 50.96    | 6.37    | o |
| 5940 | 1 | 2   | 2 | 12 | 2699.27  | 2605.27  | 82.81   | o |
| 5941 | 1 | 4   | 2 | 12 | 507.53   | 465.00   | 19.11   | o |
| 5942 | 1 | 5   | 2 | 12 | 206.72   | 226.13   | 9.55    | o |
| 5943 | 1 | 6   | 2 | 12 | 330.47   | 299.38   | 12.74   | o |
| 5944 | 1 | 7   | 2 | 12 | 13.09    | 35.03    | 6.37    | o |
| 5945 | 1 | 8   | 2 | 12 | 604.83   | 557.36   | 25.48   | o |
| 5946 | 1 | 9   | 2 | 12 | 471.06   | 617.88   | 28.66   | o |
| 5947 | 1 | 10  | 2 | 12 | 912.59   | 847.19   | 31.85   | o |
| 5948 | 1 | 11  | 2 | 12 | 3.26     | 15.92    | 3.18    | o |
| 5949 | 1 | -10 | 3 | 12 | 165.85   | 168.80   | 12.74   | o |

|      |   |     |   |    |          |          |        |   |
|------|---|-----|---|----|----------|----------|--------|---|
| 5950 | 1 | -9  | 3 | 12 | 225.46   | 257.98   | 12.74  | o |
| 5951 | 1 | -8  | 3 | 12 | 307.13   | 318.49   | 15.92  | o |
| 5952 | 1 | -7  | 3 | 12 | 239.45   | 242.05   | 15.92  | o |
| 5953 | 1 | -6  | 3 | 12 | 1.30     | 3.18     | 3.18   | < |
| 5954 | 1 | -5  | 3 | 12 | 78.94    | 89.18    | 6.37   | o |
| 5955 | 1 | -4  | 3 | 12 | 12.88    | 12.74    | 3.18   | o |
| 5956 | 1 | -3  | 3 | 12 | 370.52   | 375.82   | 15.92  | o |
| 5957 | 1 | -2  | 3 | 12 | 37.99    | 63.70    | 6.37   | o |
| 5958 | 1 | -1  | 3 | 12 | 993.60   | 1076.51  | 38.22  | o |
| 5959 | 1 | 1   | 3 | 12 | 868.52   | 773.94   | 28.66  | o |
| 5960 | 1 | 2   | 3 | 12 | 119.70   | 117.84   | 6.37   | o |
| 5961 | 1 | 3   | 3 | 12 | 178.84   | 152.88   | 12.74  | o |
| 5962 | 1 | 4   | 3 | 12 | 126.79   | 117.84   | 6.37   | o |
| 5963 | 1 | 5   | 3 | 12 | 5.43     | 6.37     | 31.85  | < |
| 5964 | 1 | 6   | 3 | 12 | 91.78    | 95.55    | 6.37   | o |
| 5965 | 1 | 7   | 3 | 12 | 467.08   | 471.37   | 22.29  | o |
| 5966 | 1 | 8   | 3 | 12 | 269.77   | 337.60   | 19.11  | o |
| 5967 | 1 | 9   | 3 | 12 | 690.03   | 840.82   | 35.03  | o |
| 5968 | 1 | 10  | 3 | 12 | 95.65    | 136.95   | 9.55   | o |
| 5969 | 1 | 11  | 3 | 12 | 616.51   | 614.69   | 28.66  | o |
| 5970 | 1 | -10 | 4 | 12 | 819.00   | 834.45   | 44.59  | o |
| 5971 | 1 | -9  | 4 | 12 | 114.46   | 111.47   | 6.37   | o |
| 5972 | 1 | -8  | 4 | 12 | 1395.24  | 1391.81  | 50.96  | o |
| 5973 | 1 | -7  | 4 | 12 | 1211.01  | 1353.59  | 54.14  | o |
| 5974 | 1 | -6  | 4 | 12 | 355.95   | 334.42   | 25.48  | o |
| 5975 | 1 | -5  | 4 | 12 | 839.38   | 885.41   | 31.85  | o |
| 5976 | 1 | -4  | 4 | 12 | 7.38     | 15.92    | 3.18   | o |
| 5977 | 1 | -3  | 4 | 12 | 245.65   | 232.50   | 12.74  | o |
| 5978 | 1 | -2  | 4 | 12 | 3085.05  | 3083.01  | 98.73  | o |
| 5979 | 1 | 0   | 4 | 12 | 24841.60 | 27565.50 | 834.45 | o |
| 5980 | 1 | 2   | 4 | 12 | 3211.16  | 2939.69  | 108.29 | o |
| 5981 | 1 | 4   | 4 | 12 | 26.67    | 28.66    | 3.18   | o |
| 5982 | 1 | 5   | 4 | 12 | 582.56   | 525.51   | 22.29  | o |
| 5983 | 1 | 6   | 4 | 12 | 1351.16  | 1417.29  | 47.77  | o |
| 5984 | 1 | 7   | 4 | 12 | 1978.18  | 2426.91  | 79.62  | o |
| 5985 | 1 | 8   | 4 | 12 | 581.53   | 646.54   | 28.66  | o |
| 5986 | 1 | 9   | 4 | 12 | 48.21    | 50.96    | 6.37   | o |
| 5987 | 1 | 10  | 4 | 12 | 1339.48  | 1474.62  | 50.96  | o |
| 5988 | 1 | 11  | 4 | 12 | 101.39   | 178.36   | 15.92  | o |
| 5989 | 1 | -10 | 5 | 12 | 111.43   | 133.77   | 12.74  | o |
| 5990 | 1 | -9  | 5 | 12 | 10.97    | 6.37     | 3.18   | < |
| 5991 | 1 | -8  | 5 | 12 | 63.00    | 63.70    | 6.37   | o |
| 5992 | 1 | -7  | 5 | 12 | 252.87   | 264.35   | 15.92  | o |
| 5993 | 1 | -6  | 5 | 12 | 73.80    | 89.18    | 6.37   | o |
| 5994 | 1 | -5  | 5 | 12 | 51.39    | 54.14    | 6.37   | o |
| 5995 | 1 | -4  | 5 | 12 | 42.88    | 44.59    | 6.37   | o |
| 5996 | 1 | -3  | 5 | 12 | 887.93   | 894.97   | 31.85  | o |
| 5997 | 1 | -2  | 5 | 12 | 84.99    | 108.29   | 6.37   | o |
| 5998 | 1 | -1  | 5 | 12 | 1122.03  | 1210.27  | 41.40  | o |
| 5999 | 1 | 0   | 5 | 12 | 82.46    | 98.73    | 6.37   | o |
| 6000 | 1 | 1   | 5 | 12 | 2035.36  | 2057.46  | 66.88  | o |
| 6001 | 1 | 2   | 5 | 12 | 329.21   | 356.71   | 15.92  | o |
| 6002 | 1 | 3   | 5 | 12 | 366.63   | 299.38   | 44.59  | o |
| 6003 | 1 | 4   | 5 | 12 | 162.07   | 149.69   | 9.55   | o |
| 6004 | 1 | 5   | 5 | 12 | 1.51     | 6.37     | 3.18   | < |
| 6005 | 1 | 6   | 5 | 12 | 56.14    | 47.77    | 6.37   | o |
| 6006 | 1 | 7   | 5 | 12 | 216.29   | 219.76   | 12.74  | o |
| 6007 | 1 | 8   | 5 | 12 | 9.32     | 15.92    | 3.18   | o |

|      |   |     |   |    |         |         |        |   |
|------|---|-----|---|----|---------|---------|--------|---|
| 6008 | 1 | 9   | 5 | 12 | 64.52   | 89.18   | 9.55   | o |
| 6009 | 1 | 10  | 5 | 12 | 41.89   | 38.22   | 6.37   | o |
| 6010 | 1 | 11  | 5 | 12 | 557.88  | 407.67  | 35.03  | o |
| 6011 | 1 | -10 | 6 | 12 | 867.69  | 805.79  | 41.40  | o |
| 6012 | 1 | -9  | 6 | 12 | 989.47  | 1111.54 | 41.40  | o |
| 6013 | 1 | -8  | 6 | 12 | 727.99  | 659.28  | 28.66  | o |
| 6014 | 1 | -7  | 6 | 12 | 1158.30 | 1226.20 | 50.96  | o |
| 6015 | 1 | -6  | 6 | 12 | 60.85   | 70.07   | 6.37   | o |
| 6016 | 1 | -5  | 6 | 12 | 6.37    | 12.74   | 3.18   | o |
| 6017 | 1 | -4  | 6 | 12 | 6728.02 | 7510.06 | 232.50 | o |
| 6018 | 1 | -2  | 6 | 12 | 1550.80 | 1707.12 | 57.33  | o |
| 6019 | 1 | -1  | 6 | 12 | 331.86  | 382.19  | 15.92  | o |
| 6020 | 1 | 0   | 6 | 12 | 221.13  | 146.51  | 9.55   | o |
| 6021 | 1 | 1   | 6 | 12 | 472.75  | 423.60  | 15.92  | o |
| 6022 | 1 | 2   | 6 | 12 | 1330.61 | 1149.76 | 38.22  | o |
| 6023 | 1 | 3   | 6 | 12 | 624.17  | 773.94  | 28.66  | o |
| 6024 | 1 | 4   | 6 | 12 | 4255.58 | 4146.77 | 130.58 | o |
| 6025 | 1 | 5   | 6 | 12 | 29.69   | 28.66   | 3.18   | o |
| 6026 | 1 | 6   | 6 | 12 | 6.10    | 19.11   | 9.55   | < |
| 6027 | 1 | 7   | 6 | 12 | 743.79  | 891.78  | 44.59  | o |
| 6028 | 1 | 8   | 6 | 12 | 354.69  | 353.53  | 15.92  | o |
| 6029 | 1 | 9   | 6 | 12 | 1015.90 | 1210.27 | 47.77  | o |
| 6030 | 1 | 10  | 6 | 12 | 1214.61 | 1098.80 | 38.22  | o |
| 6031 | 1 | 11  | 6 | 12 | 0.06    | 3.18    | 9.55   | < |
| 6032 | 1 | -10 | 7 | 12 | 155.40  | 181.54  | 15.92  | o |
| 6033 | 1 | -9  | 7 | 12 | 54.15   | 50.96   | 6.37   | o |
| 6034 | 1 | -8  | 7 | 12 | 102.18  | 130.58  | 9.55   | o |
| 6035 | 1 | -7  | 7 | 12 | 235.69  | 232.50  | 12.74  | o |
| 6036 | 1 | -6  | 7 | 12 | 123.23  | 133.77  | 9.55   | o |
| 6037 | 1 | -5  | 7 | 12 | 161.20  | 175.17  | 12.74  | o |
| 6038 | 1 | -4  | 7 | 12 | 41.26   | 50.96   | 6.37   | o |
| 6039 | 1 | -3  | 7 | 12 | 561.78  | 560.55  | 22.29  | o |
| 6040 | 1 | -2  | 7 | 12 | 31.09   | 38.22   | 3.18   | o |
| 6041 | 1 | -1  | 7 | 12 | 482.12  | 449.08  | 19.11  | o |
| 6042 | 1 | 0   | 7 | 12 | 38.34   | 47.77   | 6.37   | o |
| 6043 | 1 | 1   | 7 | 12 | 811.94  | 850.38  | 28.66  | o |
| 6044 | 1 | 2   | 7 | 12 | 13.31   | 28.66   | 3.18   | o |
| 6045 | 1 | 3   | 7 | 12 | 831.67  | 777.12  | 28.66  | o |
| 6046 | 1 | 4   | 7 | 12 | 8.20    | 12.74   | 3.18   | o |
| 6047 | 1 | 5   | 7 | 12 | 92.26   | 85.99   | 9.55   | o |
| 6048 | 1 | 6   | 7 | 12 | 63.66   | 60.51   | 6.37   | o |
| 6049 | 1 | 7   | 7 | 12 | 189.22  | 203.84  | 12.74  | o |
| 6050 | 1 | 8   | 7 | 12 | 13.76   | 12.74   | 3.18   | o |
| 6051 | 1 | 9   | 7 | 12 | 154.28  | 168.80  | 9.55   | o |
| 6052 | 1 | 10  | 7 | 12 | 16.49   | 25.48   | 6.37   | o |
| 6053 | 1 | -10 | 8 | 12 | 374.15  | 347.16  | 22.29  | o |
| 6054 | 1 | -9  | 8 | 12 | 11.20   | 19.11   | 6.37   | o |
| 6055 | 1 | -8  | 8 | 12 | 1068.87 | 1066.95 | 47.77  | o |
| 6056 | 1 | -6  | 8 | 12 | 4122.21 | 4519.41 | 140.14 | o |
| 6057 | 1 | -5  | 8 | 12 | 269.03  | 261.16  | 25.48  | o |
| 6058 | 1 | -4  | 8 | 12 | 19.26   | 47.77   | 28.66  | < |
| 6059 | 1 | -3  | 8 | 12 | 307.57  | 289.83  | 12.74  | o |
| 6060 | 1 | -2  | 8 | 12 | 3350.66 | 3277.29 | 111.47 | o |
| 6061 | 1 | 0   | 8 | 12 | 3853.25 | 4156.33 | 130.58 | o |
| 6062 | 1 | 2   | 8 | 12 | 2013.58 | 1981.02 | 63.70  | o |
| 6063 | 1 | 3   | 8 | 12 | 35.16   | 25.48   | 6.37   | o |
| 6064 | 1 | 4   | 8 | 12 | 187.40  | 156.06  | 9.55   | o |
| 6065 | 1 | 5   | 8 | 12 | 575.30  | 589.21  | 22.29  | o |

|      |   |     |    |    |         |         |        |   |
|------|---|-----|----|----|---------|---------|--------|---|
| 6066 | 1 | 6   | 8  | 12 | 4094.24 | 4659.55 | 203.84 | o |
| 6067 | 1 | 8   | 8  | 12 | 1554.61 | 1484.18 | 57.33  | o |
| 6068 | 1 | 9   | 8  | 12 | 56.92   | 73.25   | 6.37   | o |
| 6069 | 1 | 10  | 8  | 12 | 152.74  | 149.69  | 12.74  | o |
| 6070 | 1 | -10 | 9  | 12 | 403.10  | 388.56  | 25.48  | o |
| 6071 | 1 | -9  | 9  | 12 | 401.12  | 363.08  | 35.03  | o |
| 6072 | 1 | -8  | 9  | 12 | 29.10   | 35.03   | 6.37   | o |
| 6073 | 1 | -7  | 9  | 12 | 25.49   | 22.29   | 3.18   | o |
| 6074 | 1 | -6  | 9  | 12 | 12.71   | 9.55    | 3.18   | o |
| 6075 | 1 | -5  | 9  | 12 | 384.58  | 394.93  | 15.92  | o |
| 6076 | 1 | -4  | 9  | 12 | 189.31  | 171.99  | 9.55   | o |
| 6077 | 1 | -3  | 9  | 12 | 12.25   | 19.11   | 38.22  | < |
| 6078 | 1 | -2  | 9  | 12 | 270.06  | 267.53  | 12.74  | o |
| 6079 | 1 | -1  | 9  | 12 | 1166.26 | 1121.09 | 41.40  | o |
| 6080 | 1 | 0   | 9  | 12 | 220.52  | 286.64  | 12.74  | o |
| 6081 | 1 | 1   | 9  | 12 | 672.31  | 630.62  | 25.48  | o |
| 6082 | 1 | 2   | 9  | 12 | 82.36   | 76.44   | 6.37   | o |
| 6083 | 1 | 3   | 9  | 12 | 111.30  | 92.36   | 6.37   | o |
| 6084 | 1 | 4   | 9  | 12 | 110.49  | 108.29  | 6.37   | o |
| 6085 | 1 | 5   | 9  | 12 | 135.20  | 124.21  | 9.55   | o |
| 6086 | 1 | 6   | 9  | 12 | 14.41   | 15.92   | 3.18   | o |
| 6087 | 1 | 7   | 9  | 12 | 15.85   | 19.11   | 3.18   | o |
| 6088 | 1 | 8   | 9  | 12 | 2.88    | 9.55    | 3.18   | o |
| 6089 | 1 | 9   | 9  | 12 | 1017.91 | 1070.14 | 44.59  | o |
| 6090 | 1 | 10  | 9  | 12 | 243.84  | 343.97  | 22.29  | o |
| 6091 | 1 | -10 | 10 | 12 | 3581.72 | 3092.56 | 197.46 | o |
| 6092 | 1 | -8  | 10 | 12 | 23.92   | 31.85   | 6.37   | o |
| 6093 | 1 | -6  | 10 | 12 | 2114.38 | 1863.18 | 66.88  | o |
| 6094 | 1 | -5  | 10 | 12 | 104.67  | 101.92  | 25.48  | o |
| 6095 | 1 | -4  | 10 | 12 | 72.24   | 89.18   | 25.48  | o |
| 6096 | 1 | -3  | 10 | 12 | 3695.16 | 4159.52 | 130.58 | o |
| 6097 | 1 | -2  | 10 | 12 | 4178.93 | 4528.97 | 140.14 | o |
| 6098 | 1 | 0   | 10 | 12 | 1887.17 | 1630.68 | 63.70  | o |
| 6099 | 1 | 1   | 10 | 12 | 34.41   | 31.85   | 3.18   | o |
| 6100 | 1 | 2   | 10 | 12 | 3858.47 | 3684.96 | 114.66 | o |
| 6101 | 1 | 3   | 10 | 12 | 2295.63 | 2452.39 | 92.36  | o |
| 6102 | 1 | 4   | 10 | 12 | 354.03  | 289.83  | 15.92  | o |
| 6103 | 1 | 5   | 10 | 12 | 713.97  | 745.27  | 28.66  | o |
| 6104 | 1 | 6   | 10 | 12 | 2971.69 | 2844.14 | 350.34 | o |
| 6105 | 1 | 8   | 10 | 12 | 91.03   | 89.18   | 6.37   | o |
| 6106 | 1 | 9   | 10 | 12 | 210.15  | 286.64  | 19.11  | o |
| 6107 | 1 | 10  | 10 | 12 | 2053.08 | 1347.22 | 101.92 | o |
| 6108 | 1 | -9  | 11 | 12 | 218.12  | 210.21  | 15.92  | o |
| 6109 | 1 | -8  | 11 | 12 | 0.55    | 3.18    | 3.18   | < |
| 6110 | 1 | -7  | 11 | 12 | 52.19   | 60.51   | 6.37   | o |
| 6111 | 1 | -6  | 11 | 12 | 9.54    | 6.37    | 3.18   | < |
| 6112 | 1 | -5  | 11 | 12 | 329.99  | 286.64  | 12.74  | o |
| 6113 | 1 | -4  | 11 | 12 | 67.74   | 57.33   | 6.37   | o |
| 6114 | 1 | -3  | 11 | 12 | 147.77  | 149.69  | 9.55   | o |
| 6115 | 1 | -2  | 11 | 12 | 297.71  | 324.86  | 15.92  | o |
| 6116 | 1 | -1  | 11 | 12 | 775.25  | 691.13  | 25.48  | o |
| 6117 | 1 | 0   | 11 | 12 | 20.20   | 57.33   | 6.37   | o |
| 6118 | 1 | 1   | 11 | 12 | 824.61  | 764.38  | 28.66  | o |
| 6119 | 1 | 2   | 11 | 12 | 302.35  | 257.98  | 15.92  | o |
| 6120 | 1 | 3   | 11 | 12 | 255.45  | 245.24  | 12.74  | o |
| 6121 | 1 | 5   | 11 | 12 | 114.76  | 85.99   | 143.32 | < |
| 6122 | 1 | 6   | 11 | 12 | 7.32    | 6.37    | 3.18   | < |
| 6123 | 1 | 7   | 11 | 12 | 3.03    | 0.00    | 6.37   | < |



|      |   |    |    |    |         |         |        |   |
|------|---|----|----|----|---------|---------|--------|---|
| 6124 | 1 | 8  | 11 | 12 | 98.89   | 89.18   | 9.55   | o |
| 6125 | 1 | 9  | 11 | 12 | 421.78  | 490.48  | 31.85  | o |
| 6126 | 1 | -9 | 12 | 12 | 1040.69 | 891.78  | 44.59  | o |
| 6127 | 1 | -8 | 12 | 12 | 1273.55 | 1086.06 | 38.22  | o |
| 6128 | 1 | -6 | 12 | 12 | 8311.28 | 7576.94 | 270.72 | o |
| 6129 | 1 | -4 | 12 | 12 | 3066.14 | 2777.26 | 101.92 | o |
| 6130 | 1 | -3 | 12 | 12 | 326.46  | 242.05  | 12.74  | o |
| 6131 | 1 | -2 | 12 | 12 | 940.85  | 888.59  | 31.85  | o |
| 6132 | 1 | -1 | 12 | 12 | 308.28  | 363.08  | 15.92  | o |
| 6133 | 1 | 0  | 12 | 12 | 4207.47 | 4165.88 | 130.58 | o |
| 6134 | 1 | 1  | 12 | 12 | 319.07  | 375.82  | 19.11  | o |
| 6135 | 1 | 2  | 12 | 12 | 345.89  | 429.96  | 19.11  | o |
| 6136 | 1 | 3  | 12 | 12 | 390.82  | 270.72  | 15.92  | o |
| 6137 | 1 | 4  | 12 | 12 | 2327.65 | 1965.10 | 79.62  | o |
| 6138 | 1 | 6  | 12 | 12 | 8216.41 | 8669.37 | 267.53 | o |
| 6139 | 1 | 8  | 12 | 12 | 1158.13 | 1210.27 | 60.51  | o |
| 6140 | 1 | 9  | 12 | 12 | 983.80  | 1012.81 | 54.14  | o |
| 6141 | 1 | -9 | 13 | 12 | 12.45   | 15.92   | 6.37   | < |
| 6142 | 1 | -8 | 13 | 12 | 11.65   | 28.66   | 6.37   | o |
| 6143 | 1 | -7 | 13 | 12 | 631.16  | 586.03  | 22.29  | o |
| 6144 | 1 | -6 | 13 | 12 | 111.81  | 121.03  | 9.55   | o |
| 6145 | 1 | -5 | 13 | 12 | 276.61  | 267.53  | 12.74  | o |
| 6146 | 1 | -4 | 13 | 12 | 98.96   | 108.29  | 9.55   | o |
| 6147 | 1 | -3 | 13 | 12 | 685.65  | 566.92  | 22.29  | o |
| 6148 | 1 | -2 | 13 | 12 | 164.76  | 162.43  | 9.55   | o |
| 6149 | 1 | -1 | 13 | 12 | 19.61   | 25.48   | 6.37   | o |
| 6150 | 1 | 0  | 13 | 12 | 1.25    | 6.37    | 3.18   | < |
| 6151 | 1 | 1  | 13 | 12 | 108.62  | 105.10  | 9.55   | o |
| 6152 | 1 | 2  | 13 | 12 | 24.50   | 41.40   | 6.37   | o |
| 6153 | 1 | 3  | 13 | 12 | 749.84  | 624.25  | 28.66  | o |
| 6154 | 1 | 4  | 13 | 12 | 211.76  | 197.46  | 9.55   | o |
| 6155 | 1 | 5  | 13 | 12 | 380.78  | 353.53  | 15.92  | o |
| 6156 | 1 | 6  | 13 | 12 | 25.35   | 41.40   | 6.37   | o |
| 6157 | 1 | 7  | 13 | 12 | 423.95  | 404.49  | 22.29  | o |
| 6158 | 1 | 8  | 13 | 12 | 5.15    | 15.92   | 6.37   | < |
| 6159 | 1 | 9  | 13 | 12 | 3.59    | 12.74   | 6.37   | < |
| 6160 | 1 | -8 | 14 | 12 | 741.55  | 837.64  | 60.51  | o |
| 6161 | 1 | -7 | 14 | 12 | 41.24   | 57.33   | 6.37   | o |
| 6162 | 1 | -6 | 14 | 12 | 10.14   | 25.48   | 6.37   | o |
| 6163 | 1 | -5 | 14 | 12 | 7.53    | 12.74   | 3.18   | o |
| 6164 | 1 | -4 | 14 | 12 | 1838.43 | 1423.66 | 47.77  | o |
| 6165 | 1 | -3 | 14 | 12 | 2090.71 | 1799.48 | 70.07  | o |
| 6166 | 1 | -2 | 14 | 12 | 406.53  | 302.57  | 15.92  | o |
| 6167 | 1 | -1 | 14 | 12 | 789.93  | 793.05  | 28.66  | o |
| 6168 | 1 | 0  | 14 | 12 | 1123.43 | 1003.25 | 41.40  | o |
| 6169 | 1 | 1  | 14 | 12 | 358.72  | 363.08  | 15.92  | o |
| 6170 | 1 | 2  | 14 | 12 | 680.35  | 557.36  | 22.29  | o |
| 6171 | 1 | 3  | 14 | 12 | 2266.62 | 2178.49 | 70.07  | o |
| 6172 | 1 | 4  | 14 | 12 | 843.21  | 675.21  | 31.85  | o |
| 6173 | 1 | 5  | 14 | 12 | 16.82   | 31.85   | 3.18   | o |
| 6174 | 1 | 6  | 14 | 12 | 145.64  | 127.40  | 9.55   | o |
| 6175 | 1 | 7  | 14 | 12 | 12.86   | 19.11   | 6.37   | o |
| 6176 | 1 | 8  | 14 | 12 | 453.98  | 385.38  | 25.48  | o |
| 6177 | 1 | -7 | 15 | 12 | 212.22  | 222.95  | 12.74  | o |
| 6178 | 1 | -6 | 15 | 12 | 0.31    | -3.18   | 6.37   | < |
| 6179 | 1 | -5 | 15 | 12 | 9.04    | 28.66   | 12.74  | < |
| 6180 | 1 | -4 | 15 | 12 | 68.67   | 54.14   | 6.37   | o |
| 6181 | 1 | -3 | 15 | 12 | 595.18  | 560.55  | 22.29  | o |

|      |   |    |    |    |          |          |        |   |
|------|---|----|----|----|----------|----------|--------|---|
| 6182 | 1 | -2 | 15 | 12 | 74.30    | 105.10   | 9.55   | o |
| 6183 | 1 | -1 | 15 | 12 | 318.54   | 261.16   | 15.92  | o |
| 6184 | 1 | 0  | 15 | 12 | 8.43     | 15.92    | 3.18   | o |
| 6185 | 1 | 1  | 15 | 12 | 577.43   | 477.74   | 19.11  | o |
| 6186 | 1 | 2  | 15 | 12 | 95.04    | 95.55    | 6.37   | o |
| 6187 | 1 | 3  | 15 | 12 | 154.39   | 133.77   | 9.55   | o |
| 6188 | 1 | 4  | 15 | 12 | 74.23    | 79.62    | 6.37   | o |
| 6189 | 1 | 5  | 15 | 12 | 3.46     | 9.55     | 28.66  | < |
| 6190 | 1 | 6  | 15 | 12 | 200.14   | 187.91   | 15.92  | o |
| 6191 | 1 | 7  | 15 | 12 | 396.51   | 436.33   | 31.85  | o |
| 6192 | 1 | 8  | 15 | 12 | 601.86   | 729.35   | 57.33  | o |
| 6193 | 1 | -7 | 16 | 12 | 337.94   | 203.84   | 31.85  | o |
| 6194 | 1 | -6 | 16 | 12 | 6.43     | 3.18     | 3.18   | < |
| 6195 | 1 | -5 | 16 | 12 | 858.45   | 627.43   | 41.40  | o |
| 6196 | 1 | -4 | 16 | 12 | 118.07   | 124.21   | 9.55   | o |
| 6197 | 1 | -2 | 16 | 12 | 2530.65  | 2213.52  | 73.25  | o |
| 6198 | 1 | 0  | 16 | 12 | 26745.70 | 29030.60 | 879.04 | o |
| 6199 | 1 | 2  | 16 | 12 | 2671.20  | 2264.48  | 73.25  | o |
| 6200 | 1 | 3  | 16 | 12 | 1049.44  | 850.38   | 31.85  | o |
| 6201 | 1 | 4  | 16 | 12 | 103.79   | 73.25    | 6.37   | o |
| 6202 | 1 | 5  | 16 | 12 | 653.37   | 528.70   | 38.22  | o |
| 6203 | 1 | 6  | 16 | 12 | 70.91    | 54.14    | 9.55   | o |
| 6204 | 1 | 7  | 16 | 12 | 908.82   | 1038.29  | 73.25  | o |
| 6205 | 1 | 8  | 16 | 12 | 133.72   | 133.77   | 25.48  | o |
| 6206 | 1 | -6 | 17 | 12 | 24.75    | 15.92    | 6.37   | < |
| 6207 | 1 | -5 | 17 | 12 | 75.05    | 79.62    | 9.55   | o |
| 6208 | 1 | -4 | 17 | 12 | 41.66    | 41.40    | 6.37   | o |
| 6209 | 1 | -3 | 17 | 12 | 33.46    | 31.85    | 3.18   | o |
| 6210 | 1 | -2 | 17 | 12 | 6.53     | 19.11    | 3.18   | o |
| 6211 | 1 | -1 | 17 | 12 | 1117.82  | 980.96   | 35.03  | o |
| 6212 | 1 | 1  | 17 | 12 | 759.33   | 716.61   | 28.66  | o |
| 6213 | 1 | 3  | 17 | 12 | 17.54    | 12.74    | 6.37   | < |
| 6214 | 1 | 4  | 17 | 12 | 17.98    | 9.55     | 6.37   | < |
| 6215 | 1 | 5  | 17 | 12 | 3.78     | 3.18     | 6.37   | < |
| 6216 | 1 | 6  | 17 | 12 | 0.12     | -3.18    | 6.37   | < |
| 6217 | 1 | -6 | 18 | 12 | 319.92   | 248.42   | 19.11  | o |
| 6218 | 1 | -5 | 18 | 12 | 52.89    | 44.59    | 6.37   | o |
| 6219 | 1 | -4 | 18 | 12 | 974.43   | 710.24   | 38.22  | o |
| 6220 | 1 | -2 | 18 | 12 | 801.60   | 754.83   | 31.85  | o |
| 6221 | 1 | -1 | 18 | 12 | 109.08   | 85.99    | 9.55   | o |
| 6222 | 1 | 0  | 18 | 12 | 716.82   | 531.88   | 25.48  | o |
| 6223 | 1 | 1  | 18 | 12 | 297.18   | 238.87   | 15.92  | o |
| 6224 | 1 | 2  | 18 | 12 | 614.98   | 490.48   | 28.66  | o |
| 6225 | 1 | 4  | 18 | 12 | 1111.70  | 1047.84  | 73.25  | o |
| 6226 | 1 | -6 | 19 | 12 | 15.37    | 31.85    | 12.74  | < |
| 6227 | 1 | -5 | 19 | 12 | 273.26   | 210.21   | 15.92  | o |
| 6228 | 1 | -4 | 19 | 12 | 49.32    | 47.77    | 6.37   | o |
| 6229 | 1 | -3 | 19 | 12 | 21.37    | 25.48    | 9.55   | < |
| 6230 | 1 | -2 | 19 | 12 | 111.24   | 89.18    | 9.55   | o |
| 6231 | 1 | -1 | 19 | 12 | 502.00   | 372.64   | 35.03  | o |
| 6232 | 1 | 0  | 19 | 12 | 144.27   | 133.77   | 19.11  | o |
| 6233 | 1 | -5 | 20 | 12 | 44.53    | 85.99    | 9.55   | o |
| 6234 | 1 | -4 | 20 | 12 | 176.24   | 101.92   | 28.66  | o |
| 6235 | 1 | -3 | 20 | 12 | 0.05     | 12.74    | 9.55   | < |
| 6236 | 1 | -9 | 1  | 13 | 77.33    | 85.99    | 6.37   | o |
| 6237 | 1 | -8 | 1  | 13 | 1002.61  | 961.85   | 35.03  | o |
| 6238 | 1 | -7 | 1  | 13 | 794.88   | 888.59   | 31.85  | o |
| 6239 | 1 | -6 | 1  | 13 | 1369.09  | 1805.85  | 60.51  | o |

|      |   |    |   |    |         |         |        |   |
|------|---|----|---|----|---------|---------|--------|---|
| 6240 | 1 | -5 | 1 | 13 | 503.60  | 598.77  | 22.29  | o |
| 6241 | 1 | -4 | 1 | 13 | 268.24  | 251.61  | 12.74  | o |
| 6242 | 1 | -2 | 1 | 13 | 3096.28 | 3455.65 | 108.29 | o |
| 6243 | 1 | -1 | 1 | 13 | 317.45  | 372.64  | 15.92  | o |
| 6244 | 1 | 0  | 1 | 13 | 1.32    | 9.55    | 3.18   | o |
| 6245 | 1 | 1  | 1 | 13 | 1006.29 | 1098.80 | 38.22  | o |
| 6246 | 1 | 2  | 1 | 13 | 2581.30 | 2643.49 | 82.81  | o |
| 6247 | 1 | 4  | 1 | 13 | 99.50   | 76.44   | 6.37   | o |
| 6248 | 1 | 5  | 1 | 13 | 447.89  | 535.07  | 22.29  | o |
| 6249 | 1 | 6  | 1 | 13 | 1048.35 | 1092.43 | 44.59  | o |
| 6250 | 1 | 7  | 1 | 13 | 978.77  | 1121.09 | 38.22  | o |
| 6251 | 1 | 8  | 1 | 13 | 802.24  | 716.61  | 28.66  | o |
| 6252 | 1 | 9  | 1 | 13 | 68.55   | 85.99   | 6.37   | o |
| 6253 | 1 | 10 | 1 | 13 | 542.25  | 528.70  | 25.48  | o |
| 6254 | 1 | -9 | 2 | 13 | 51.16   | 50.96   | 6.37   | o |
| 6255 | 1 | -8 | 2 | 13 | 3.59    | 19.11   | 3.18   | o |
| 6256 | 1 | -7 | 2 | 13 | 11.28   | 9.55    | 3.18   | o |
| 6257 | 1 | -6 | 2 | 13 | 145.50  | 152.88  | 9.55   | o |
| 6258 | 1 | -5 | 2 | 13 | 46.04   | 54.14   | 6.37   | o |
| 6259 | 1 | -4 | 2 | 13 | 39.45   | 57.33   | 6.37   | o |
| 6260 | 1 | -3 | 2 | 13 | 416.13  | 452.26  | 19.11  | o |
| 6261 | 1 | -2 | 2 | 13 | 331.91  | 334.42  | 15.92  | o |
| 6262 | 1 | -1 | 2 | 13 | 5.04    | 6.37    | 3.18   | < |
| 6263 | 1 | 0  | 2 | 13 | 112.33  | 111.47  | 6.37   | o |
| 6264 | 1 | 1  | 2 | 13 | 206.52  | 207.02  | 9.55   | o |
| 6265 | 1 | 2  | 2 | 13 | 323.36  | 324.86  | 15.92  | o |
| 6266 | 1 | 3  | 2 | 13 | 94.98   | 70.07   | 9.55   | o |
| 6267 | 1 | 4  | 2 | 13 | 17.81   | 22.29   | 3.18   | o |
| 6268 | 1 | 5  | 2 | 13 | 15.54   | 25.48   | 3.18   | o |
| 6269 | 1 | 6  | 2 | 13 | 238.36  | 248.42  | 15.92  | o |
| 6270 | 1 | 7  | 2 | 13 | 167.80  | 184.73  | 9.55   | o |
| 6271 | 1 | 8  | 2 | 13 | 4.00    | 6.37    | 3.18   | < |
| 6272 | 1 | 9  | 2 | 13 | 20.08   | 22.29   | 3.18   | o |
| 6273 | 1 | 10 | 2 | 13 | 5.58    | 6.37    | 3.18   | < |
| 6274 | 1 | -9 | 3 | 13 | 28.70   | 60.51   | 6.37   | o |
| 6275 | 1 | -8 | 3 | 13 | 384.97  | 391.75  | 19.11  | o |
| 6276 | 1 | -6 | 3 | 13 | 49.79   | 70.07   | 6.37   | o |
| 6277 | 1 | -5 | 3 | 13 | 170.98  | 251.61  | 12.74  | o |
| 6278 | 1 | -4 | 3 | 13 | 1204.25 | 1391.81 | 47.77  | o |
| 6279 | 1 | -3 | 3 | 13 | 318.02  | 299.38  | 12.74  | o |
| 6280 | 1 | -2 | 3 | 13 | 401.27  | 404.49  | 15.92  | o |
| 6281 | 1 | -1 | 3 | 13 | 443.35  | 566.92  | 22.29  | o |
| 6282 | 1 | 1  | 3 | 13 | 2083.15 | 2159.38 | 73.25  | o |
| 6283 | 1 | 2  | 3 | 13 | 431.78  | 359.90  | 19.11  | o |
| 6284 | 1 | 3  | 3 | 13 | 18.40   | 44.59   | 9.55   | o |
| 6285 | 1 | 4  | 3 | 13 | 1182.21 | 1019.18 | 50.96  | o |
| 6286 | 1 | 5  | 3 | 13 | 80.51   | 121.03  | 6.37   | o |
| 6287 | 1 | 6  | 3 | 13 | 84.26   | 101.92  | 6.37   | o |
| 6288 | 1 | 8  | 3 | 13 | 424.49  | 420.41  | 22.29  | o |
| 6289 | 1 | 9  | 3 | 13 | 135.33  | 133.77  | 9.55   | o |
| 6290 | 1 | 10 | 3 | 13 | 63.01   | 70.07   | 6.37   | o |
| 6291 | 1 | -9 | 4 | 13 | 21.42   | 22.29   | 3.18   | o |
| 6292 | 1 | -8 | 4 | 13 | 3.07    | 9.55    | 3.18   | o |
| 6293 | 1 | -7 | 4 | 13 | 0.06    | 0.00    | 3.18   | < |
| 6294 | 1 | -6 | 4 | 13 | 80.55   | 85.99   | 6.37   | o |
| 6295 | 1 | -5 | 4 | 13 | 74.11   | 85.99   | 9.55   | o |
| 6296 | 1 | -4 | 4 | 13 | 30.92   | 35.03   | 19.11  | < |
| 6297 | 1 | -3 | 4 | 13 | 10.47   | 12.74   | 3.18   | o |

|      |   |    |   |    |         |         |        |   |
|------|---|----|---|----|---------|---------|--------|---|
| 6298 | 1 | -2 | 4 | 13 | 0.01    | 6.37    | 3.18   | < |
| 6299 | 1 | -1 | 4 | 13 | 53.79   | 44.59   | 6.37   | o |
| 6300 | 1 | 0  | 4 | 13 | 584.44  | 570.10  | 22.29  | o |
| 6301 | 1 | 1  | 4 | 13 | 7.88    | 12.74   | 3.18   | o |
| 6302 | 1 | 2  | 4 | 13 | 0.70    | -3.18   | 3.18   | < |
| 6303 | 1 | 3  | 4 | 13 | 33.93   | 35.03   | 3.18   | o |
| 6304 | 1 | 4  | 4 | 13 | 75.97   | 76.44   | 6.37   | o |
| 6305 | 1 | 5  | 4 | 13 | 31.89   | 41.40   | 6.37   | o |
| 6306 | 1 | 6  | 4 | 13 | 8.25    | 6.37    | 38.22  | < |
| 6307 | 1 | 7  | 4 | 13 | 0.06    | 3.18    | 3.18   | < |
| 6308 | 1 | 8  | 4 | 13 | 2.05    | 0.00    | 3.18   | < |
| 6309 | 1 | 9  | 4 | 13 | 6.76    | 6.37    | 3.18   | < |
| 6310 | 1 | 10 | 4 | 13 | 12.04   | 15.92   | 6.37   | < |
| 6311 | 1 | -9 | 5 | 13 | 113.60  | 175.17  | 15.92  | o |
| 6312 | 1 | -8 | 5 | 13 | 1418.64 | 1468.25 | 57.33  | o |
| 6313 | 1 | -6 | 5 | 13 | 47.88   | 41.40   | 6.37   | o |
| 6314 | 1 | -4 | 5 | 13 | 2741.40 | 3000.20 | 95.55  | o |
| 6315 | 1 | -3 | 5 | 13 | 57.04   | 70.07   | 6.37   | o |
| 6316 | 1 | -2 | 5 | 13 | 567.93  | 550.99  | 22.29  | o |
| 6317 | 1 | -1 | 5 | 13 | 3504.05 | 3936.57 | 124.21 | o |
| 6318 | 1 | 1  | 5 | 13 | 2858.07 | 2729.48 | 85.99  | o |
| 6319 | 1 | 2  | 5 | 13 | 715.04  | 601.95  | 22.29  | o |
| 6320 | 1 | 4  | 5 | 13 | 2600.02 | 2277.22 | 85.99  | o |
| 6321 | 1 | 8  | 5 | 13 | 1512.39 | 1442.77 | 57.33  | o |
| 6322 | 1 | 9  | 5 | 13 | 18.56   | 50.96   | 6.37   | o |
| 6323 | 1 | 10 | 5 | 13 | 57.35   | 70.07   | 9.55   | o |
| 6324 | 1 | -9 | 6 | 13 | 230.01  | 216.57  | 19.11  | o |
| 6325 | 1 | -8 | 6 | 13 | 3.31    | 9.55    | 3.18   | o |
| 6326 | 1 | -7 | 6 | 13 | 5.20    | 3.18    | 3.18   | < |
| 6327 | 1 | -6 | 6 | 13 | 0.55    | -3.18   | 3.18   | < |
| 6328 | 1 | -5 | 6 | 13 | 0.99    | 3.18    | 3.18   | < |
| 6329 | 1 | -4 | 6 | 13 | 12.27   | 12.74   | 19.11  | < |
| 6330 | 1 | -3 | 6 | 13 | 16.77   | 41.40   | 6.37   | o |
| 6331 | 1 | -2 | 6 | 13 | 70.42   | 89.18   | 6.37   | o |
| 6332 | 1 | -1 | 6 | 13 | 0.22    | 3.18    | 3.18   | < |
| 6333 | 1 | 0  | 6 | 13 | 4.26    | 6.37    | 3.18   | < |
| 6334 | 1 | 1  | 6 | 13 | 19.61   | 19.11   | 3.18   | o |
| 6335 | 1 | 2  | 6 | 13 | 134.30  | 130.58  | 9.55   | o |
| 6336 | 1 | 4  | 6 | 13 | 1.04    | 6.37    | 3.18   | < |
| 6337 | 1 | 5  | 6 | 13 | 23.68   | 19.11   | 3.18   | o |
| 6338 | 1 | 6  | 6 | 13 | 2.46    | 0.00    | 3.18   | < |
| 6339 | 1 | 7  | 6 | 13 | 148.28  | 143.32  | 9.55   | o |
| 6340 | 1 | 8  | 6 | 13 | 0.62    | 9.55    | 3.18   | o |
| 6341 | 1 | 9  | 6 | 13 | 13.59   | 22.29   | 6.37   | o |
| 6342 | 1 | 10 | 6 | 13 | 12.07   | 15.92   | 6.37   | < |
| 6343 | 1 | -9 | 7 | 13 | 113.74  | 114.66  | 9.55   | o |
| 6344 | 1 | -8 | 7 | 13 | 594.71  | 627.43  | 28.66  | o |
| 6345 | 1 | -7 | 7 | 13 | 1.81    | 31.85   | 6.37   | o |
| 6346 | 1 | -6 | 7 | 13 | 446.75  | 385.38  | 19.11  | o |
| 6347 | 1 | -5 | 7 | 13 | 1574.07 | 1891.85 | 73.25  | o |
| 6348 | 1 | -4 | 7 | 13 | 942.62  | 942.74  | 38.22  | o |
| 6349 | 1 | -3 | 7 | 13 | 112.18  | 105.10  | 28.66  | o |
| 6350 | 1 | -2 | 7 | 13 | 269.62  | 270.72  | 15.92  | o |
| 6351 | 1 | -1 | 7 | 13 | 2994.02 | 3321.88 | 105.10 | o |
| 6352 | 1 | 1  | 7 | 13 | 1471.25 | 1318.56 | 50.96  | o |
| 6353 | 1 | 2  | 7 | 13 | 403.13  | 353.53  | 22.29  | o |
| 6354 | 1 | 3  | 7 | 13 | 542.67  | 426.78  | 19.11  | o |
| 6355 | 1 | 4  | 7 | 13 | 897.29  | 828.08  | 35.03  | o |

|      |   |    |    |    |         |         |       |   |
|------|---|----|----|----|---------|---------|-------|---|
| 6356 | 1 | 5  | 7  | 13 | 478.89  | 544.62  | 38.22 | o |
| 6357 | 1 | 6  | 7  | 13 | 208.59  | 168.80  | 9.55  | o |
| 6358 | 1 | 7  | 7  | 13 | 35.99   | 60.51   | 6.37  | o |
| 6359 | 1 | 8  | 7  | 13 | 787.01  | 716.61  | 28.66 | o |
| 6360 | 1 | 9  | 7  | 13 | 136.19  | 140.14  | 12.74 | o |
| 6361 | 1 | 10 | 7  | 13 | 80.78   | 60.51   | 12.74 | o |
| 6362 | 1 | -9 | 8  | 13 | 76.41   | 89.18   | 9.55  | o |
| 6363 | 1 | -8 | 8  | 13 | 104.69  | 105.10  | 6.37  | o |
| 6364 | 1 | -7 | 8  | 13 | 62.58   | 76.44   | 6.37  | o |
| 6365 | 1 | -6 | 8  | 13 | 77.67   | 85.99   | 9.55  | o |
| 6366 | 1 | -5 | 8  | 13 | 76.18   | 82.81   | 6.37  | o |
| 6367 | 1 | -4 | 8  | 13 | 44.05   | 41.40   | 6.37  | o |
| 6368 | 1 | -3 | 8  | 13 | 2.59    | 6.37    | 3.18  | < |
| 6369 | 1 | -2 | 8  | 13 | 34.98   | 35.03   | 6.37  | o |
| 6370 | 1 | -1 | 8  | 13 | 1.84    | 3.18    | 3.18  | < |
| 6371 | 1 | 0  | 8  | 13 | 200.98  | 187.91  | 12.74 | o |
| 6372 | 1 | 1  | 8  | 13 | 37.10   | 35.03   | 6.37  | o |
| 6373 | 1 | 2  | 8  | 13 | 19.16   | 22.29   | 3.18  | o |
| 6374 | 1 | 3  | 8  | 13 | 9.93    | 9.55    | 3.18  | o |
| 6375 | 1 | 4  | 8  | 13 | 68.38   | 63.70   | 6.37  | o |
| 6376 | 1 | 5  | 8  | 13 | 60.57   | 44.59   | 6.37  | o |
| 6377 | 1 | 6  | 8  | 13 | 157.38  | 171.99  | 9.55  | o |
| 6378 | 1 | 8  | 8  | 13 | 125.65  | 133.77  | 9.55  | o |
| 6379 | 1 | 9  | 8  | 13 | 14.07   | 19.11   | 6.37  | o |
| 6380 | 1 | -9 | 9  | 13 | 0.80    | 12.74   | 6.37  | < |
| 6381 | 1 | -8 | 9  | 13 | 3.24    | 15.92   | 3.18  | o |
| 6382 | 1 | -7 | 9  | 13 | 529.45  | 544.62  | 22.29 | o |
| 6383 | 1 | -5 | 9  | 13 | 1728.10 | 1624.31 | 63.70 | o |
| 6384 | 1 | -4 | 9  | 13 | 800.14  | 694.31  | 31.85 | o |
| 6385 | 1 | -3 | 9  | 13 | 74.60   | 70.07   | 6.37  | o |
| 6386 | 1 | -2 | 9  | 13 | 2210.82 | 2105.24 | 70.07 | o |
| 6387 | 1 | 2  | 9  | 13 | 1416.04 | 1302.64 | 50.96 | o |
| 6388 | 1 | 3  | 9  | 13 | 3.09    | 6.37    | 12.74 | < |
| 6389 | 1 | 4  | 9  | 13 | 848.79  | 700.68  | 44.59 | o |
| 6390 | 1 | 5  | 9  | 13 | 1841.12 | 1984.21 | 66.88 | o |
| 6391 | 1 | 7  | 9  | 13 | 391.19  | 302.57  | 38.22 | o |
| 6392 | 1 | 8  | 9  | 13 | 11.38   | 12.74   | 6.37  | < |
| 6393 | 1 | 9  | 9  | 13 | 0.63    | 9.55    | 6.37  | < |
| 6394 | 1 | -9 | 10 | 13 | 0.03    | 15.92   | 6.37  | < |
| 6395 | 1 | -8 | 10 | 13 | 0.17    | 3.18    | 3.18  | < |
| 6396 | 1 | -7 | 10 | 13 | 42.75   | 57.33   | 9.55  | o |
| 6397 | 1 | -6 | 10 | 13 | 38.02   | 44.59   | 6.37  | o |
| 6398 | 1 | -5 | 10 | 13 | 11.23   | 15.92   | 3.18  | o |
| 6399 | 1 | -4 | 10 | 13 | 89.65   | 98.73   | 6.37  | o |
| 6400 | 1 | -3 | 10 | 13 | 12.51   | 22.29   | 6.37  | o |
| 6401 | 1 | -2 | 10 | 13 | 226.36  | 203.84  | 15.92 | o |
| 6402 | 1 | -1 | 10 | 13 | 0.14    | 12.74   | 6.37  | < |
| 6403 | 1 | 0  | 10 | 13 | 183.68  | 181.54  | 12.74 | o |
| 6404 | 1 | 1  | 10 | 13 | 47.15   | 73.25   | 9.55  | o |
| 6405 | 1 | 2  | 10 | 13 | 263.36  | 245.24  | 15.92 | o |
| 6406 | 1 | 3  | 10 | 13 | 91.77   | 92.36   | 6.37  | o |
| 6407 | 1 | 4  | 10 | 13 | 98.60   | 114.66  | 9.55  | o |
| 6408 | 1 | 5  | 10 | 13 | 0.45    | 0.00    | 3.18  | < |
| 6409 | 1 | 6  | 10 | 13 | 82.65   | 89.18   | 6.37  | o |
| 6410 | 1 | 7  | 10 | 13 | 12.55   | 22.29   | 6.37  | o |
| 6411 | 1 | 8  | 10 | 13 | 0.08    | 0.00    | 6.37  | < |
| 6412 | 1 | 9  | 10 | 13 | 4.30    | 19.11   | 6.37  | o |
| 6413 | 1 | -9 | 11 | 13 | 64.99   | 85.99   | 12.74 | o |

|      |   |    |    |    |         |         |        |   |
|------|---|----|----|----|---------|---------|--------|---|
| 6414 | 1 | -8 | 11 | 13 | 140.55  | 124.21  | 12.74  | o |
| 6415 | 1 | -7 | 11 | 13 | 1646.08 | 1525.58 | 54.14  | o |
| 6416 | 1 | -6 | 11 | 13 | 242.63  | 270.72  | 19.11  | o |
| 6417 | 1 | -5 | 11 | 13 | 1841.26 | 1452.33 | 130.58 | o |
| 6418 | 1 | -4 | 11 | 13 | 158.29  | 149.69  | 12.74  | o |
| 6419 | 1 | -3 | 11 | 13 | 230.81  | 200.65  | 12.74  | o |
| 6420 | 1 | -2 | 11 | 13 | 5280.04 | 5436.67 | 168.80 | o |
| 6421 | 1 | -1 | 11 | 13 | 465.93  | 614.69  | 22.29  | o |
| 6422 | 1 | 0  | 11 | 13 | 0.09    | 19.11   | 6.37   | o |
| 6423 | 1 | 2  | 11 | 13 | 4614.58 | 4414.31 | 136.95 | o |
| 6424 | 1 | 3  | 11 | 13 | 10.60   | 12.74   | 15.92  | < |
| 6425 | 1 | 4  | 11 | 13 | 217.52  | 226.13  | 12.74  | o |
| 6426 | 1 | 5  | 11 | 13 | 3476.14 | 3850.58 | 121.03 | o |
| 6427 | 1 | 7  | 11 | 13 | 1501.03 | 1519.21 | 73.25  | o |
| 6428 | 1 | 8  | 11 | 13 | 86.73   | 92.36   | 12.74  | o |
| 6429 | 1 | 9  | 11 | 13 | 55.02   | 85.99   | 12.74  | o |
| 6430 | 1 | -8 | 12 | 13 | 0.64    | 6.37    | 3.18   | < |
| 6431 | 1 | -7 | 12 | 13 | 261.18  | 238.87  | 12.74  | o |
| 6432 | 1 | -6 | 12 | 13 | 19.10   | 15.92   | 3.18   | o |
| 6433 | 1 | -5 | 12 | 13 | 50.11   | 50.96   | 6.37   | o |
| 6434 | 1 | -4 | 12 | 13 | 55.39   | 70.07   | 6.37   | o |
| 6435 | 1 | -3 | 12 | 13 | 60.65   | 73.25   | 9.55   | o |
| 6436 | 1 | -2 | 12 | 13 | 2.29    | 6.37    | 3.18   | < |
| 6437 | 1 | -1 | 12 | 13 | 120.55  | 111.47  | 9.55   | o |
| 6438 | 1 | 0  | 12 | 13 | 399.38  | 388.56  | 19.11  | o |
| 6439 | 1 | 1  | 12 | 13 | 342.80  | 334.42  | 15.92  | o |
| 6440 | 1 | 3  | 12 | 13 | 192.87  | 152.88  | 9.55   | o |
| 6441 | 1 | 4  | 12 | 13 | 115.24  | 98.73   | 6.37   | o |
| 6442 | 1 | 5  | 12 | 13 | 154.85  | 168.80  | 9.55   | o |
| 6443 | 1 | 6  | 12 | 13 | 34.59   | 31.85   | 6.37   | o |
| 6444 | 1 | 7  | 12 | 13 | 6.50    | 3.18    | 6.37   | < |
| 6445 | 1 | 8  | 12 | 13 | 23.86   | 28.66   | 6.37   | o |
| 6446 | 1 | -7 | 13 | 13 | 56.48   | 85.99   | 12.74  | o |
| 6447 | 1 | -6 | 13 | 13 | 527.71  | 538.25  | 25.48  | o |
| 6448 | 1 | -5 | 13 | 13 | 264.50  | 305.75  | 15.92  | o |
| 6449 | 1 | -4 | 13 | 13 | 243.13  | 197.46  | 12.74  | o |
| 6450 | 1 | -3 | 13 | 13 | 97.71   | 101.92  | 9.55   | o |
| 6451 | 1 | -2 | 13 | 13 | 801.28  | 675.21  | 25.48  | o |
| 6452 | 1 | -1 | 13 | 13 | 107.99  | 130.58  | 9.55   | o |
| 6453 | 1 | 0  | 13 | 13 | 3.07    | 9.55    | 3.18   | o |
| 6454 | 1 | 1  | 13 | 13 | 339.08  | 343.97  | 15.92  | o |
| 6455 | 1 | 2  | 13 | 13 | 799.53  | 697.50  | 25.48  | o |
| 6456 | 1 | 3  | 13 | 13 | 49.01   | 28.66   | 15.92  | < |
| 6457 | 1 | 4  | 13 | 13 | 104.30  | 108.29  | 6.37   | o |
| 6458 | 1 | 5  | 13 | 13 | 16.24   | 114.66  | 25.48  | o |
| 6459 | 1 | 6  | 13 | 13 | 353.76  | 382.19  | 25.48  | o |
| 6460 | 1 | 7  | 13 | 13 | 162.49  | 283.46  | 25.48  | o |
| 6461 | 1 | -7 | 14 | 13 | 0.44    | 3.18    | 6.37   | < |
| 6462 | 1 | -6 | 14 | 13 | 118.86  | 124.21  | 12.74  | o |
| 6463 | 1 | -5 | 14 | 13 | 0.87    | 25.48   | 6.37   | o |
| 6464 | 1 | -4 | 14 | 13 | 408.45  | 366.27  | 22.29  | o |
| 6465 | 1 | -2 | 14 | 13 | 15.98   | 15.92   | 3.18   | o |
| 6466 | 1 | -1 | 14 | 13 | 22.33   | 22.29   | 3.18   | o |
| 6467 | 1 | 0  | 14 | 13 | 389.41  | 328.05  | 15.92  | o |
| 6468 | 1 | 1  | 14 | 13 | 28.03   | 31.85   | 3.18   | o |
| 6469 | 1 | 2  | 14 | 13 | 31.96   | 31.85   | 3.18   | o |
| 6470 | 1 | 4  | 14 | 13 | 415.87  | 321.68  | 28.66  | o |
| 6471 | 1 | 5  | 14 | 13 | 14.00   | 50.96   | 6.37   | o |

|      |   |    |    |    |         |         |        |   |
|------|---|----|----|----|---------|---------|--------|---|
| 6472 | 1 | 6  | 14 | 13 | 94.78   | 111.47  | 15.92  | o |
| 6473 | 1 | -6 | 15 | 13 | 197.05  | 184.73  | 15.92  | o |
| 6474 | 1 | -5 | 15 | 13 | 1292.87 | 1009.62 | 50.96  | o |
| 6475 | 1 | -4 | 15 | 13 | 418.65  | 363.08  | 19.11  | o |
| 6476 | 1 | -3 | 15 | 13 | 7.40    | 19.11   | 3.18   | o |
| 6477 | 1 | -2 | 15 | 13 | 3.63    | 3.18    | 3.18   | < |
| 6478 | 1 | -1 | 15 | 13 | 3997.74 | 3570.30 | 111.47 | o |
| 6479 | 1 | 0  | 15 | 13 | 83.31   | 136.95  | 9.55   | o |
| 6480 | 1 | 1  | 15 | 13 | 2750.44 | 2385.51 | 76.44  | o |
| 6481 | 1 | 2  | 15 | 13 | 32.45   | 25.48   | 3.18   | o |
| 6482 | 1 | 3  | 15 | 13 | 0.37    | 9.55    | 3.18   | o |
| 6483 | 1 | 4  | 15 | 13 | 383.23  | 356.71  | 31.85  | o |
| 6484 | 1 | 5  | 15 | 13 | 1324.61 | 1165.68 | 82.81  | o |
| 6485 | 1 | -6 | 16 | 13 | 110.30  | 111.47  | 12.74  | o |
| 6486 | 1 | -5 | 16 | 13 | 113.69  | 111.47  | 9.55   | o |
| 6487 | 1 | -4 | 16 | 13 | 1.94    | 15.92   | 6.37   | < |
| 6488 | 1 | -3 | 16 | 13 | 12.71   | 6.37    | 6.37   | < |
| 6489 | 1 | -2 | 16 | 13 | 127.65  | 130.58  | 9.55   | o |
| 6490 | 1 | -1 | 16 | 13 | 29.21   | 54.14   | 6.37   | o |
| 6491 | 1 | 0  | 16 | 13 | 425.68  | 401.30  | 19.11  | o |
| 6492 | 1 | 1  | 16 | 13 | 48.00   | 63.70   | 6.37   | o |
| 6493 | 1 | 2  | 16 | 13 | 65.72   | 54.14   | 6.37   | o |
| 6494 | 1 | 3  | 16 | 13 | 123.10  | 117.84  | 15.92  | o |
| 6495 | 1 | -6 | 17 | 13 | 42.75   | 44.59   | 6.37   | o |
| 6496 | 1 | -5 | 17 | 13 | 1022.64 | 904.52  | 47.77  | o |
| 6497 | 1 | -4 | 17 | 13 | 1368.54 | 961.85  | 50.96  | o |
| 6498 | 1 | -3 | 17 | 13 | 20.71   | 15.92   | 6.37   | < |
| 6499 | 1 | -2 | 17 | 13 | 84.72   | 82.81   | 12.74  | o |
| 6500 | 1 | -1 | 17 | 13 | 435.22  | 410.86  | 38.22  | o |
| 6501 | 1 | -5 | 18 | 13 | 4.81    | 9.55    | 6.37   | < |
| 6502 | 1 | -4 | 18 | 13 | 16.49   | 19.11   | 6.37   | o |
| 6503 | 1 | -3 | 18 | 13 | 141.28  | 121.03  | 19.11  | o |
| 6504 | 1 | -2 | 18 | 13 | 383.58  | 343.97  | 35.03  | o |
| 6505 | 1 | -8 | 0  | 14 | 734.31  | 767.57  | 47.77  | o |
| 6506 | 1 | -7 | 0  | 14 | 1254.58 | 1735.79 | 114.66 | o |
| 6507 | 1 | -6 | 0  | 14 | 3587.83 | 4573.56 | 283.46 | o |
| 6508 | 1 | -5 | 0  | 14 | 532.91  | 643.35  | 50.96  | o |
| 6509 | 1 | -4 | 0  | 14 | 270.60  | 248.42  | 25.48  | o |
| 6510 | 1 | -3 | 0  | 14 | 4031.92 | 4669.10 | 289.83 | o |
| 6511 | 1 | -1 | 0  | 14 | 314.38  | 315.31  | 28.66  | o |
| 6512 | 1 | 0  | 0  | 14 | 537.56  | 401.30  | 25.48  | o |
| 6513 | 1 | 1  | 0  | 14 | 1535.59 | 1608.39 | 73.25  | o |
| 6514 | 1 | 3  | 0  | 14 | 4039.06 | 3968.42 | 248.42 | o |
| 6515 | 1 | 4  | 0  | 14 | 149.29  | 162.43  | 12.74  | o |
| 6516 | 1 | 5  | 0  | 14 | 265.21  | 350.34  | 35.03  | o |
| 6517 | 1 | 6  | 0  | 14 | 5659.79 | 6541.84 | 283.46 | o |
| 6518 | 1 | 7  | 0  | 14 | 580.15  | 675.21  | 38.22  | o |
| 6519 | 1 | 8  | 0  | 14 | 139.46  | 152.88  | 19.11  | o |
| 6520 | 1 | -8 | 1  | 14 | 59.29   | 76.44   | 6.37   | o |
| 6521 | 1 | -7 | 1  | 14 | 471.18  | 531.88  | 25.48  | o |
| 6522 | 1 | -6 | 1  | 14 | 147.09  | 181.54  | 12.74  | o |
| 6523 | 1 | -5 | 1  | 14 | 242.98  | 226.13  | 15.92  | o |
| 6524 | 1 | -4 | 1  | 14 | 91.16   | 105.10  | 9.55   | o |
| 6525 | 1 | -3 | 1  | 14 | 304.86  | 337.60  | 19.11  | o |
| 6526 | 1 | -2 | 1  | 14 | 1118.86 | 1337.67 | 63.70  | o |
| 6527 | 1 | -1 | 1  | 14 | 134.45  | 156.06  | 12.74  | o |
| 6528 | 1 | 0  | 1  | 14 | 3.84    | 3.18    | 3.18   | < |
| 6529 | 1 | 1  | 1  | 14 | 110.96  | 117.84  | 6.37   | o |

|      |   |    |   |    |         |         |        |   |
|------|---|----|---|----|---------|---------|--------|---|
| 6530 | 1 | 2  | 1 | 14 | 131.66  | 133.77  | 9.55   | o |
| 6531 | 1 | 3  | 1 | 14 | 554.58  | 601.95  | 31.85  | o |
| 6532 | 1 | 4  | 1 | 14 | 247.35  | 267.53  | 12.74  | o |
| 6533 | 1 | 5  | 1 | 14 | 443.18  | 480.92  | 19.11  | o |
| 6534 | 1 | 7  | 1 | 14 | 689.57  | 745.27  | 28.66  | o |
| 6535 | 1 | 8  | 1 | 14 | 133.12  | 146.51  | 12.74  | o |
| 6536 | 1 | -9 | 2 | 14 | 23.20   | 143.32  | 28.66  | o |
| 6537 | 1 | -8 | 2 | 14 | 1072.77 | 1203.90 | 47.77  | o |
| 6538 | 1 | -7 | 2 | 14 | 24.55   | 38.22   | 6.37   | o |
| 6539 | 1 | -6 | 2 | 14 | 303.69  | 277.09  | 15.92  | o |
| 6540 | 1 | -5 | 2 | 14 | 42.90   | 38.22   | 22.29  | < |
| 6541 | 1 | -4 | 2 | 14 | 1646.96 | 1735.79 | 63.70  | o |
| 6542 | 1 | -2 | 2 | 14 | 3410.47 | 3720.00 | 165.62 | o |
| 6543 | 1 | -1 | 2 | 14 | 485.43  | 452.26  | 22.29  | o |
| 6544 | 1 | 0  | 2 | 14 | 473.81  | 439.52  | 19.11  | o |
| 6545 | 1 | 1  | 2 | 14 | 178.21  | 133.77  | 9.55   | o |
| 6546 | 1 | 2  | 2 | 14 | 3904.48 | 4013.01 | 203.84 | o |
| 6547 | 1 | 4  | 2 | 14 | 1217.31 | 1181.61 | 41.40  | o |
| 6548 | 1 | 5  | 2 | 14 | 70.57   | 63.70   | 6.37   | o |
| 6549 | 1 | 6  | 2 | 14 | 362.25  | 363.08  | 15.92  | o |
| 6550 | 1 | 7  | 2 | 14 | 0.88    | 3.18    | 3.18   | < |
| 6551 | 1 | 8  | 2 | 14 | 808.86  | 700.68  | 35.03  | o |
| 6552 | 1 | -9 | 3 | 14 | 140.96  | 121.03  | 12.74  | o |
| 6553 | 1 | -8 | 3 | 14 | 374.91  | 426.78  | 22.29  | o |
| 6554 | 1 | -7 | 3 | 14 | 119.73  | 152.88  | 12.74  | o |
| 6555 | 1 | -6 | 3 | 14 | 60.46   | 79.62   | 6.37   | o |
| 6556 | 1 | -5 | 3 | 14 | 279.27  | 299.38  | 15.92  | o |
| 6557 | 1 | -4 | 3 | 14 | 130.88  | 171.99  | 9.55   | o |
| 6558 | 1 | -3 | 3 | 14 | 485.55  | 512.77  | 25.48  | o |
| 6559 | 1 | -2 | 3 | 14 | 11.43   | 25.48   | 6.37   | o |
| 6560 | 1 | -1 | 3 | 14 | 817.64  | 837.64  | 35.03  | o |
| 6561 | 1 | 0  | 3 | 14 | 17.07   | 31.85   | 3.18   | o |
| 6562 | 1 | 1  | 3 | 14 | 606.91  | 579.66  | 22.29  | o |
| 6563 | 1 | 2  | 3 | 14 | 27.58   | 35.03   | 9.55   | o |
| 6564 | 1 | 3  | 3 | 14 | 337.67  | 289.83  | 12.74  | o |
| 6565 | 1 | 4  | 3 | 14 | 14.24   | 15.92   | 3.18   | o |
| 6566 | 1 | 5  | 3 | 14 | 442.57  | 449.08  | 19.11  | o |
| 6567 | 1 | 6  | 3 | 14 | 1.71    | 12.74   | 3.18   | o |
| 6568 | 1 | 7  | 3 | 14 | 249.55  | 283.46  | 12.74  | o |
| 6569 | 1 | 8  | 3 | 14 | 55.25   | 57.33   | 9.55   | o |
| 6570 | 1 | -9 | 4 | 14 | 480.76  | 423.60  | 28.66  | o |
| 6571 | 1 | -8 | 4 | 14 | 271.57  | 308.94  | 15.92  | o |
| 6572 | 1 | -6 | 4 | 14 | 824.81  | 821.71  | 41.40  | o |
| 6573 | 1 | -3 | 4 | 14 | 1699.74 | 1914.14 | 73.25  | o |
| 6574 | 1 | -2 | 4 | 14 | 97.32   | 121.03  | 9.55   | o |
| 6575 | 1 | 0  | 4 | 14 | 3808.85 | 4067.15 | 127.40 | o |
| 6576 | 1 | 1  | 4 | 14 | 303.89  | 359.90  | 19.11  | o |
| 6577 | 1 | 2  | 4 | 14 | 13.13   | 25.48   | 6.37   | o |
| 6578 | 1 | 3  | 4 | 14 | 1429.26 | 1344.04 | 44.59  | o |
| 6579 | 1 | 4  | 4 | 14 | 95.53   | 152.88  | 9.55   | o |
| 6580 | 1 | 5  | 4 | 14 | 139.22  | 156.06  | 9.55   | o |
| 6581 | 1 | 6  | 4 | 14 | 253.72  | 194.28  | 15.92  | o |
| 6582 | 1 | 7  | 4 | 14 | 100.49  | 121.03  | 9.55   | o |
| 6583 | 1 | 8  | 4 | 14 | 398.81  | 465.00  | 38.22  | o |
| 6584 | 1 | -9 | 5 | 14 | 223.74  | 216.57  | 15.92  | o |
| 6585 | 1 | -8 | 5 | 14 | 55.20   | 66.88   | 6.37   | o |
| 6586 | 1 | -7 | 5 | 14 | 0.54    | 3.18    | 3.18   | < |
| 6587 | 1 | -6 | 5 | 14 | 15.94   | 22.29   | 3.18   | o |



|      |   |    |   |    |         |         |        |   |
|------|---|----|---|----|---------|---------|--------|---|
| 6588 | 1 | -5 | 5 | 14 | 635.06  | 703.87  | 38.22  | o |
| 6589 | 1 | -4 | 5 | 14 | 400.76  | 426.78  | 25.48  | o |
| 6590 | 1 | -3 | 5 | 14 | 141.93  | 159.25  | 12.74  | o |
| 6591 | 1 | -2 | 5 | 14 | 12.74   | 12.74   | 3.18   | o |
| 6592 | 1 | -1 | 5 | 14 | 301.11  | 283.46  | 12.74  | o |
| 6593 | 1 | 0  | 5 | 14 | 156.98  | 200.65  | 12.74  | o |
| 6594 | 1 | 1  | 5 | 14 | 601.59  | 598.77  | 35.03  | o |
| 6595 | 1 | 2  | 5 | 14 | 9.02    | 15.92   | 3.18   | o |
| 6596 | 1 | 3  | 5 | 14 | 113.66  | 121.03  | 6.37   | o |
| 6597 | 1 | 4  | 5 | 14 | 14.61   | 28.66   | 15.92  | < |
| 6598 | 1 | 5  | 5 | 14 | 859.27  | 840.82  | 31.85  | o |
| 6599 | 1 | 6  | 5 | 14 | 15.67   | 22.29   | 3.18   | o |
| 6600 | 1 | 7  | 5 | 14 | 7.52    | 9.55    | 9.55   | < |
| 6601 | 1 | 8  | 5 | 14 | 5.93    | 12.74   | 6.37   | < |
| 6602 | 1 | -9 | 6 | 14 | 1547.46 | 1672.09 | 82.81  | o |
| 6603 | 1 | -8 | 6 | 14 | 553.24  | 729.35  | 28.66  | o |
| 6604 | 1 | -7 | 6 | 14 | 1118.49 | 1070.14 | 44.59  | o |
| 6605 | 1 | -6 | 6 | 14 | 1251.58 | 1200.72 | 47.77  | o |
| 6606 | 1 | -5 | 6 | 14 | 505.96  | 605.14  | 28.66  | o |
| 6607 | 1 | -4 | 6 | 14 | 6468.13 | 7054.61 | 251.61 | o |
| 6608 | 1 | -2 | 6 | 14 | 687.58  | 681.57  | 31.85  | o |
| 6609 | 1 | -1 | 6 | 14 | 516.53  | 480.92  | 22.29  | o |
| 6610 | 1 | 0  | 6 | 14 | 122.18  | 121.03  | 12.74  | o |
| 6611 | 1 | 1  | 6 | 14 | 932.03  | 773.94  | 28.66  | o |
| 6612 | 1 | 2  | 6 | 14 | 863.73  | 789.86  | 28.66  | o |
| 6613 | 1 | 4  | 6 | 14 | 7017.36 | 7038.69 | 216.57 | o |
| 6614 | 1 | 5  | 6 | 14 | 535.39  | 531.88  | 22.29  | o |
| 6615 | 1 | 6  | 6 | 14 | 671.47  | 595.58  | 41.40  | o |
| 6616 | 1 | 7  | 6 | 14 | 769.42  | 789.86  | 35.03  | o |
| 6617 | 1 | 8  | 6 | 14 | 1426.72 | 1751.71 | 117.84 | o |
| 6618 | 1 | -9 | 7 | 14 | 37.65   | 44.59   | 6.37   | o |
| 6619 | 1 | -8 | 7 | 14 | 1.17    | 6.37    | 3.18   | < |
| 6620 | 1 | -7 | 7 | 14 | 65.60   | 60.51   | 9.55   | o |
| 6621 | 1 | -6 | 7 | 14 | 25.71   | 25.48   | 6.37   | o |
| 6622 | 1 | -5 | 7 | 14 | 289.53  | 328.05  | 15.92  | o |
| 6623 | 1 | -4 | 7 | 14 | 257.25  | 273.90  | 15.92  | o |
| 6624 | 1 | -3 | 7 | 14 | 294.40  | 293.01  | 19.11  | o |
| 6625 | 1 | -2 | 7 | 14 | 211.24  | 242.05  | 12.74  | o |
| 6626 | 1 | -1 | 7 | 14 | 7.87    | 12.74   | 3.18   | o |
| 6627 | 1 | 0  | 7 | 14 | 6.09    | 3.18    | 3.18   | < |
| 6628 | 1 | 1  | 7 | 14 | 51.81   | 47.77   | 6.37   | o |
| 6629 | 1 | 2  | 7 | 14 | 53.43   | 50.96   | 6.37   | o |
| 6630 | 1 | 3  | 7 | 14 | 873.81  | 875.85  | 31.85  | o |
| 6631 | 1 | 4  | 7 | 14 | 23.14   | 54.14   | 12.74  | o |
| 6632 | 1 | 5  | 7 | 14 | 491.85  | 509.59  | 22.29  | o |
| 6633 | 1 | 6  | 7 | 14 | 1.27    | 6.37    | 3.18   | < |
| 6634 | 1 | 7  | 7 | 14 | 89.51   | 130.58  | 12.74  | o |
| 6635 | 1 | 8  | 7 | 14 | 19.03   | 22.29   | 6.37   | o |
| 6636 | 1 | -8 | 8 | 14 | 304.43  | 321.68  | 22.29  | o |
| 6637 | 1 | -6 | 8 | 14 | 253.09  | 248.42  | 28.66  | o |
| 6638 | 1 | -5 | 8 | 14 | 151.37  | 146.51  | 9.55   | o |
| 6639 | 1 | -4 | 8 | 14 | 165.23  | 121.03  | 9.55   | o |
| 6640 | 1 | -3 | 8 | 14 | 1070.30 | 961.85  | 57.33  | o |
| 6641 | 1 | -2 | 8 | 14 | 591.90  | 608.32  | 76.44  | o |
| 6642 | 1 | 0  | 8 | 14 | 348.76  | 343.97  | 15.92  | o |
| 6643 | 1 | 2  | 8 | 14 | 801.60  | 773.94  | 28.66  | o |
| 6644 | 1 | 3  | 8 | 14 | 1603.63 | 1614.76 | 54.14  | o |
| 6645 | 1 | 4  | 8 | 14 | 245.53  | 200.65  | 9.55   | o |

|      |   |    |    |    |         |         |        |   |
|------|---|----|----|----|---------|---------|--------|---|
| 6646 | 1 | 6  | 8  | 14 | 416.01  | 388.56  | 19.11  | o |
| 6647 | 1 | 7  | 8  | 14 | 33.68   | 140.14  | 19.11  | o |
| 6648 | 1 | -8 | 9  | 14 | 66.49   | 66.88   | 9.55   | o |
| 6649 | 1 | -7 | 9  | 14 | 279.68  | 286.64  | 15.92  | o |
| 6650 | 1 | -6 | 9  | 14 | 251.41  | 308.94  | 15.92  | o |
| 6651 | 1 | -5 | 9  | 14 | 169.48  | 187.91  | 12.74  | o |
| 6652 | 1 | -4 | 9  | 14 | 9.48    | 19.11   | 6.37   | o |
| 6653 | 1 | -3 | 9  | 14 | 711.01  | 735.72  | 92.36  | o |
| 6654 | 1 | -2 | 9  | 14 | 23.81   | 50.96   | 6.37   | o |
| 6655 | 1 | -1 | 9  | 14 | 409.84  | 385.38  | 15.92  | o |
| 6656 | 1 | 0  | 9  | 14 | 52.79   | 50.96   | 6.37   | o |
| 6657 | 1 | 1  | 9  | 14 | 294.25  | 280.27  | 12.74  | o |
| 6658 | 1 | 2  | 9  | 14 | 78.75   | 76.44   | 6.37   | o |
| 6659 | 1 | 3  | 9  | 14 | 886.22  | 821.71  | 28.66  | o |
| 6660 | 1 | 4  | 9  | 14 | 38.73   | 38.22   | 3.18   | o |
| 6661 | 1 | 5  | 9  | 14 | 73.02   | 85.99   | 9.55   | o |
| 6662 | 1 | 6  | 9  | 14 | 5.15    | 15.92   | 6.37   | < |
| 6663 | 1 | 7  | 9  | 14 | 440.39  | 525.51  | 41.40  | o |
| 6664 | 1 | -8 | 10 | 14 | 817.34  | 748.46  | 57.33  | o |
| 6665 | 1 | -7 | 10 | 14 | 192.75  | 121.03  | 9.55   | o |
| 6666 | 1 | -6 | 10 | 14 | 292.03  | 296.20  | 15.92  | o |
| 6667 | 1 | -5 | 10 | 14 | 366.79  | 407.67  | 19.11  | o |
| 6668 | 1 | -4 | 10 | 14 | 3784.00 | 3783.69 | 293.01 | o |
| 6669 | 1 | -2 | 10 | 14 | 2621.59 | 2694.45 | 85.99  | o |
| 6670 | 1 | -1 | 10 | 14 | 1817.06 | 1640.24 | 54.14  | o |
| 6671 | 1 | 0  | 10 | 14 | 190.08  | 187.91  | 9.55   | o |
| 6672 | 1 | 1  | 10 | 14 | 1808.94 | 1799.48 | 60.51  | o |
| 6673 | 1 | 2  | 10 | 14 | 3968.10 | 3888.80 | 121.03 | o |
| 6674 | 1 | 3  | 10 | 14 | 753.41  | 917.26  | 38.22  | o |
| 6675 | 1 | 4  | 10 | 14 | 2188.38 | 1697.57 | 872.67 | < |
| 6676 | 1 | 5  | 10 | 14 | 347.36  | 270.72  | 15.92  | o |
| 6677 | 1 | 6  | 10 | 14 | 502.31  | 525.51  | 60.51  | o |
| 6678 | 1 | -7 | 11 | 14 | 65.16   | 79.62   | 9.55   | o |
| 6679 | 1 | -6 | 11 | 14 | 38.73   | 31.85   | 6.37   | o |
| 6680 | 1 | -5 | 11 | 14 | 134.90  | 127.40  | 9.55   | o |
| 6681 | 1 | -4 | 11 | 14 | 43.39   | 44.59   | 6.37   | o |
| 6682 | 1 | -3 | 11 | 14 | 558.56  | 541.44  | 44.59  | o |
| 6683 | 1 | -2 | 11 | 14 | 743.00  | 716.61  | 25.48  | o |
| 6684 | 1 | -1 | 11 | 14 | 152.18  | 162.43  | 9.55   | o |
| 6685 | 1 | 0  | 11 | 14 | 18.61   | 19.11   | 3.18   | o |
| 6686 | 1 | 1  | 11 | 14 | 238.16  | 261.16  | 12.74  | o |
| 6687 | 1 | 2  | 11 | 14 | 79.10   | 79.62   | 12.74  | o |
| 6688 | 1 | 3  | 11 | 14 | 545.91  | 490.48  | 79.62  | o |
| 6689 | 1 | 4  | 11 | 14 | 38.21   | 41.40   | 6.37   | o |
| 6690 | 1 | 5  | 11 | 14 | 88.98   | 121.03  | 15.92  | o |
| 6691 | 1 | 6  | 11 | 14 | 0.01    | 3.18    | 3.18   | < |
| 6692 | 1 | -6 | 12 | 14 | 1719.08 | 1509.66 | 117.84 | o |
| 6693 | 1 | -5 | 12 | 14 | 0.45    | 25.48   | 6.37   | o |
| 6694 | 1 | -4 | 12 | 14 | 195.82  | 143.32  | 22.29  | o |
| 6695 | 1 | -3 | 12 | 14 | 1612.89 | 1474.62 | 50.96  | o |
| 6696 | 1 | -1 | 12 | 14 | 1034.51 | 898.15  | 31.85  | o |
| 6697 | 1 | 0  | 12 | 14 | 444.23  | 404.49  | 19.11  | o |
| 6698 | 1 | 1  | 12 | 14 | 1758.97 | 1649.79 | 54.14  | o |
| 6699 | 1 | 3  | 12 | 14 | 2192.60 | 1751.71 | 70.07  | o |
| 6700 | 1 | 4  | 12 | 14 | 344.86  | 350.34  | 31.85  | o |
| 6701 | 1 | 5  | 12 | 14 | 19.36   | 60.51   | 12.74  | o |
| 6702 | 1 | -6 | 13 | 14 | 1.02    | 28.66   | 6.37   | o |
| 6703 | 1 | -5 | 13 | 14 | 385.45  | 337.60  | 28.66  | o |

|      |   |    |    |    |         |         |        |   |
|------|---|----|----|----|---------|---------|--------|---|
| 6704 | 1 | -4 | 13 | 14 | 606.17  | 535.07  | 25.48  | o |
| 6705 | 1 | -3 | 13 | 14 | 55.06   | 70.07   | 28.66  | < |
| 6706 | 1 | -2 | 13 | 14 | 183.35  | 197.46  | 12.74  | o |
| 6707 | 1 | -1 | 13 | 14 | 1.32    | 9.55    | 3.18   | o |
| 6708 | 1 | 0  | 13 | 14 | 111.53  | 114.66  | 9.55   | o |
| 6709 | 1 | 1  | 13 | 14 | 76.00   | 70.07   | 6.37   | o |
| 6710 | 1 | 2  | 13 | 14 | 349.35  | 289.83  | 19.11  | o |
| 6711 | 1 | 3  | 13 | 14 | 294.70  | 347.16  | 31.85  | o |
| 6712 | 1 | -6 | 14 | 14 | 173.32  | 143.32  | 12.74  | o |
| 6713 | 1 | -5 | 14 | 14 | 944.08  | 802.60  | 44.59  | o |
| 6714 | 1 | -4 | 14 | 14 | 1035.54 | 796.23  | 44.59  | o |
| 6715 | 1 | -3 | 14 | 14 | 286.54  | 337.60  | 22.29  | o |
| 6716 | 1 | -2 | 14 | 14 | 1470.91 | 1114.72 | 54.14  | o |
| 6717 | 1 | -1 | 14 | 14 | 247.91  | 127.40  | 159.25 | < |
| 6718 | 1 | 0  | 14 | 14 | 484.44  | 385.38  | 25.48  | o |
| 6719 | 1 | 1  | 14 | 14 | 521.08  | 340.79  | 22.29  | o |
| 6720 | 1 | -6 | 15 | 14 | 5.37    | 9.55    | 6.37   | < |
| 6721 | 1 | -5 | 15 | 14 | 766.83  | 582.84  | 41.40  | o |
| 6722 | 1 | -4 | 15 | 14 | 65.75   | 89.18   | 9.55   | o |
| 6723 | 1 | -3 | 15 | 14 | 203.29  | 133.77  | 12.74  | o |
| 6724 | 1 | -2 | 15 | 14 | 12.54   | 9.55    | 9.55   | < |
| 6725 | 1 | -1 | 15 | 14 | 253.96  | 197.46  | 22.29  | o |
| 6726 | 1 | 0  | 15 | 14 | 31.65   | 6.37    | 114.66 | < |
| 6727 | 1 | -5 | 16 | 14 | 786.31  | 541.44  | 66.88  | o |
| 6728 | 1 | -8 | 1  | 15 | 39.95   | 47.77   | 6.37   | o |
| 6729 | 1 | -7 | 1  | 15 | 1513.34 | 1786.74 | 60.51  | o |
| 6730 | 1 | -4 | 1  | 15 | 279.71  | 334.42  | 15.92  | o |
| 6731 | 1 | -3 | 1  | 15 | 235.63  | 232.50  | 12.74  | o |
| 6732 | 1 | -2 | 1  | 15 | 419.98  | 512.77  | 22.29  | o |
| 6733 | 1 | -1 | 1  | 15 | 3081.00 | 3385.58 | 105.10 | o |
| 6734 | 1 | 1  | 1  | 15 | 2725.36 | 2872.80 | 92.36  | o |
| 6735 | 1 | 2  | 1  | 15 | 698.95  | 694.31  | 28.66  | o |
| 6736 | 1 | 3  | 1  | 15 | 550.89  | 550.99  | 22.29  | o |
| 6737 | 1 | 4  | 1  | 15 | 165.54  | 181.54  | 9.55   | o |
| 6738 | 1 | 5  | 1  | 15 | 148.43  | 191.10  | 12.74  | o |
| 6739 | 1 | -8 | 2  | 15 | 0.01    | 0.00    | 3.18   | < |
| 6740 | 1 | -7 | 2  | 15 | 101.26  | 133.77  | 9.55   | o |
| 6741 | 1 | -6 | 2  | 15 | 431.51  | 525.51  | 22.29  | o |
| 6742 | 1 | -4 | 2  | 15 | 79.29   | 101.92  | 6.37   | o |
| 6743 | 1 | -3 | 2  | 15 | 36.63   | 50.96   | 6.37   | o |
| 6744 | 1 | -2 | 2  | 15 | 8.54    | 9.55    | 3.18   | o |
| 6745 | 1 | -1 | 2  | 15 | 0.29    | 12.74   | 3.18   | o |
| 6746 | 1 | 0  | 2  | 15 | 463.30  | 439.52  | 19.11  | o |
| 6747 | 1 | 2  | 2  | 15 | 0.08    | 3.18    | 3.18   | < |
| 6748 | 1 | 3  | 2  | 15 | 60.14   | 70.07   | 6.37   | o |
| 6749 | 1 | 4  | 2  | 15 | 54.13   | 47.77   | 6.37   | o |
| 6750 | 1 | 5  | 2  | 15 | 143.59  | 140.14  | 9.55   | o |
| 6751 | 1 | 6  | 2  | 15 | 119.29  | 124.21  | 15.92  | o |
| 6752 | 1 | -8 | 3  | 15 | 59.41   | 60.51   | 9.55   | o |
| 6753 | 1 | -6 | 3  | 15 | 36.52   | 38.22   | 6.37   | o |
| 6754 | 1 | -4 | 3  | 15 | 46.92   | 114.66  | 12.74  | o |
| 6755 | 1 | -3 | 3  | 15 | 1934.43 | 2140.27 | 70.07  | o |
| 6756 | 1 | -1 | 3  | 15 | 276.12  | 321.68  | 15.92  | o |
| 6757 | 1 | 3  | 3  | 15 | 956.77  | 770.75  | 38.22  | o |
| 6758 | 1 | 4  | 3  | 15 | 171.29  | 226.13  | 12.74  | o |
| 6759 | 1 | 5  | 3  | 15 | 426.53  | 433.15  | 22.29  | o |
| 6760 | 1 | 6  | 3  | 15 | 112.43  | 127.40  | 15.92  | o |
| 6761 | 1 | -8 | 4  | 15 | 11.80   | 9.55    | 6.37   | < |

|      |   |    |   |    |         |         |       |   |
|------|---|----|---|----|---------|---------|-------|---|
| 6762 | 1 | -7 | 4 | 15 | 0.12    | 3.18    | 6.37  | < |
| 6763 | 1 | -6 | 4 | 15 | 4.48    | 9.55    | 3.18  | o |
| 6764 | 1 | -5 | 4 | 15 | 0.03    | 0.00    | 3.18  | < |
| 6765 | 1 | -4 | 4 | 15 | 13.03   | 12.74   | 3.18  | o |
| 6766 | 1 | -3 | 4 | 15 | 0.22    | 0.00    | 3.18  | < |
| 6767 | 1 | -2 | 4 | 15 | 4.01    | 6.37    | 3.18  | < |
| 6768 | 1 | -1 | 4 | 15 | 21.82   | 15.92   | 3.18  | o |
| 6769 | 1 | 0  | 4 | 15 | 1.15    | 6.37    | 3.18  | < |
| 6770 | 1 | 1  | 4 | 15 | 0.14    | 0.00    | 3.18  | < |
| 6771 | 1 | 2  | 4 | 15 | 26.61   | 31.85   | 3.18  | o |
| 6772 | 1 | 3  | 4 | 15 | 9.85    | 9.55    | 3.18  | o |
| 6773 | 1 | 4  | 4 | 15 | 26.95   | 31.85   | 3.18  | o |
| 6774 | 1 | 5  | 4 | 15 | 15.03   | 19.11   | 6.37  | o |
| 6775 | 1 | 6  | 4 | 15 | 5.29    | 3.18    | 3.18  | < |
| 6776 | 1 | -8 | 5 | 15 | 43.45   | 41.40   | 9.55  | o |
| 6777 | 1 | -7 | 5 | 15 | 670.61  | 729.35  | 28.66 | o |
| 6778 | 1 | -6 | 5 | 15 | 40.43   | 79.62   | 6.37  | o |
| 6779 | 1 | -5 | 5 | 15 | 1640.13 | 2003.32 | 70.07 | o |
| 6780 | 1 | -4 | 5 | 15 | 234.10  | 324.86  | 15.92 | o |
| 6781 | 1 | -3 | 5 | 15 | 895.38  | 968.22  | 35.03 | o |
| 6782 | 1 | -2 | 5 | 15 | 133.62  | 130.58  | 9.55  | o |
| 6783 | 1 | -1 | 5 | 15 | 1504.11 | 1640.24 | 54.14 | o |
| 6784 | 1 | 1  | 5 | 15 | 1163.53 | 1079.69 | 44.59 | o |
| 6785 | 1 | 2  | 5 | 15 | 0.11    | 0.00    | 3.18  | < |
| 6786 | 1 | 3  | 5 | 15 | 871.22  | 786.68  | 28.66 | o |
| 6787 | 1 | 4  | 5 | 15 | 726.48  | 729.35  | 31.85 | o |
| 6788 | 1 | 5  | 5 | 15 | 1157.85 | 1051.03 | 57.33 | o |
| 6789 | 1 | -8 | 6 | 15 | 1.75    | 9.55    | 6.37  | < |
| 6790 | 1 | -7 | 6 | 15 | 76.34   | 73.25   | 6.37  | o |
| 6791 | 1 | -6 | 6 | 15 | 11.39   | 12.74   | 3.18  | o |
| 6792 | 1 | -5 | 6 | 15 | 21.65   | 19.11   | 12.74 | < |
| 6793 | 1 | -4 | 6 | 15 | 28.77   | 38.22   | 6.37  | o |
| 6794 | 1 | -3 | 6 | 15 | 49.33   | 57.33   | 6.37  | o |
| 6795 | 1 | -2 | 6 | 15 | 13.20   | 19.11   | 3.18  | o |
| 6796 | 1 | -1 | 6 | 15 | 10.87   | 12.74   | 3.18  | o |
| 6797 | 1 | 0  | 6 | 15 | 24.82   | 28.66   | 3.18  | o |
| 6798 | 1 | 1  | 6 | 15 | 35.89   | 38.22   | 6.37  | o |
| 6799 | 1 | 2  | 6 | 15 | 3.85    | 9.55    | 3.18  | o |
| 6800 | 1 | 3  | 6 | 15 | 0.16    | -3.18   | 3.18  | < |
| 6801 | 1 | 4  | 6 | 15 | 6.94    | 3.18    | 3.18  | < |
| 6802 | 1 | 5  | 6 | 15 | 0.91    | 6.37    | 6.37  | < |
| 6803 | 1 | -7 | 7 | 15 | 7.67    | 15.92   | 6.37  | < |
| 6804 | 1 | -6 | 7 | 15 | 36.27   | 28.66   | 6.37  | o |
| 6805 | 1 | -5 | 7 | 15 | 681.10  | 783.49  | 35.03 | o |
| 6806 | 1 | -4 | 7 | 15 | 1000.12 | 1079.69 | 38.22 | o |
| 6807 | 1 | -3 | 7 | 15 | 89.29   | 114.66  | 9.55  | o |
| 6808 | 1 | -2 | 7 | 15 | 100.58  | 70.07   | 6.37  | o |
| 6809 | 1 | -1 | 7 | 15 | 737.64  | 888.59  | 31.85 | o |
| 6810 | 1 | 1  | 7 | 15 | 1733.77 | 1799.48 | 60.51 | o |
| 6811 | 1 | 2  | 7 | 15 | 43.10   | 41.40   | 3.18  | o |
| 6812 | 1 | 3  | 7 | 15 | 378.33  | 308.94  | 15.92 | o |
| 6813 | 1 | 4  | 7 | 15 | 1637.25 | 1398.18 | 70.07 | o |
| 6814 | 1 | 5  | 7 | 15 | 290.33  | 242.05  | 28.66 | o |
| 6815 | 1 | -7 | 8 | 15 | 1.15    | 6.37    | 12.74 | < |
| 6816 | 1 | -6 | 8 | 15 | 43.96   | 70.07   | 6.37  | o |
| 6817 | 1 | -5 | 8 | 15 | 0.06    | 12.74   | 3.18  | o |
| 6818 | 1 | -4 | 8 | 15 | 174.43  | 203.84  | 12.74 | o |
| 6819 | 1 | -3 | 8 | 15 | 8.06    | 9.55    | 9.55  | < |

|      |   |    |    |    |         |         |        |   |
|------|---|----|----|----|---------|---------|--------|---|
| 6820 | 1 | -2 | 8  | 15 | 2.66    | 6.37    | 3.18   | < |
| 6821 | 1 | -1 | 8  | 15 | 8.33    | 12.74   | 3.18   | o |
| 6822 | 1 | 0  | 8  | 15 | 9.32    | 15.92   | 9.55   | < |
| 6823 | 1 | 1  | 8  | 15 | 63.37   | 60.51   | 6.37   | o |
| 6824 | 1 | 2  | 8  | 15 | 0.23    | 0.00    | 3.18   | < |
| 6825 | 1 | 3  | 8  | 15 | 51.10   | 47.77   | 6.37   | o |
| 6826 | 1 | 4  | 8  | 15 | 38.05   | 57.33   | 12.74  | o |
| 6827 | 1 | -7 | 9  | 15 | 0.44    | 79.62   | 22.29  | o |
| 6828 | 1 | -6 | 9  | 15 | 16.02   | 41.40   | 6.37   | o |
| 6829 | 1 | -5 | 9  | 15 | 124.44  | 207.02  | 15.92  | o |
| 6830 | 1 | -4 | 9  | 15 | 279.84  | 289.83  | 15.92  | o |
| 6831 | 1 | -3 | 9  | 15 | 820.96  | 837.64  | 35.03  | o |
| 6832 | 1 | -2 | 9  | 15 | 10.06   | 44.59   | 6.37   | o |
| 6833 | 1 | 0  | 9  | 15 | 6.15    | 35.03   | 9.55   | o |
| 6834 | 1 | 2  | 9  | 15 | 50.11   | 76.44   | 9.55   | o |
| 6835 | 1 | 3  | 9  | 15 | 704.17  | 624.25  | 47.77  | o |
| 6836 | 1 | -6 | 10 | 15 | 19.63   | 19.11   | 6.37   | o |
| 6837 | 1 | -5 | 10 | 15 | 37.34   | 35.03   | 6.37   | o |
| 6838 | 1 | -4 | 10 | 15 | 4.03    | 6.37    | 44.59  | < |
| 6839 | 1 | -3 | 10 | 15 | 3.22    | 9.55    | 3.18   | o |
| 6840 | 1 | -2 | 10 | 15 | 19.00   | 25.48   | 3.18   | o |
| 6841 | 1 | -1 | 10 | 15 | 18.81   | 35.03   | 6.37   | o |
| 6842 | 1 | 0  | 10 | 15 | 217.90  | 165.62  | 12.74  | o |
| 6843 | 1 | 1  | 10 | 15 | 0.05    | 6.37    | 3.18   | < |
| 6844 | 1 | 2  | 10 | 15 | 60.39   | 44.59   | 6.37   | o |
| 6845 | 1 | -6 | 11 | 15 | 99.54   | 181.54  | 15.92  | o |
| 6846 | 1 | -5 | 11 | 15 | 1782.50 | 1844.07 | 89.18  | o |
| 6847 | 1 | -4 | 11 | 15 | 91.17   | 57.33   | 9.55   | o |
| 6848 | 1 | -3 | 11 | 15 | 318.10  | 283.46  | 19.11  | o |
| 6849 | 1 | -1 | 11 | 15 | 575.72  | 414.04  | 38.22  | o |
| 6850 | 1 | 0  | 11 | 15 | 66.57   | 79.62   | 12.74  | o |
| 6851 | 1 | -6 | 12 | 15 | 11.43   | 12.74   | 6.37   | < |
| 6852 | 1 | -5 | 12 | 15 | 154.92  | 127.40  | 15.92  | o |
| 6853 | 1 | -4 | 12 | 15 | 68.65   | 35.03   | 9.55   | o |
| 6854 | 1 | -3 | 12 | 15 | 1.12    | 12.74   | 6.37   | < |
| 6855 | 1 | -2 | 12 | 15 | 121.66  | 136.95  | 19.11  | o |
| 6856 | 1 | -1 | 12 | 15 | 116.90  | 121.03  | 19.11  | o |
| 6857 | 1 | -5 | 13 | 15 | 125.57  | 101.92  | 15.92  | o |
| 6858 | 1 | -4 | 13 | 15 | 277.98  | 181.54  | 22.29  | o |
| 6859 | 1 | -3 | 13 | 15 | 466.00  | 136.95  | 171.99 | < |
| 6860 | 1 | -7 | 0  | 16 | 2290.68 | 2503.35 | 162.43 | o |
| 6861 | 1 | -6 | 0  | 16 | 539.75  | 668.84  | 50.96  | o |
| 6862 | 1 | -4 | 0  | 16 | 2080.05 | 2175.31 | 101.92 | o |
| 6863 | 1 | -3 | 0  | 16 | 676.69  | 745.27  | 41.40  | o |
| 6864 | 1 | -2 | 0  | 16 | 460.07  | 640.17  | 35.03  | o |
| 6865 | 1 | -1 | 0  | 16 | 2783.05 | 3462.02 | 152.88 | o |
| 6866 | 1 | 0  | 0  | 16 | 5740.70 | 5688.28 | 251.61 | o |
| 6867 | 1 | 1  | 0  | 16 | 2145.66 | 2391.88 | 156.06 | o |
| 6868 | 1 | -7 | 1  | 16 | 163.32  | 216.57  | 15.92  | o |
| 6869 | 1 | -6 | 1  | 16 | 0.19    | 0.00    | 3.18   | < |
| 6870 | 1 | -5 | 1  | 16 | 238.96  | 289.83  | 15.92  | o |
| 6871 | 1 | -4 | 1  | 16 | 253.87  | 293.01  | 15.92  | o |
| 6872 | 1 | -3 | 1  | 16 | 193.25  | 229.32  | 12.74  | o |
| 6873 | 1 | -2 | 1  | 16 | 6.66    | 6.37    | 3.18   | < |
| 6874 | 1 | -1 | 1  | 16 | 196.32  | 222.95  | 12.74  | o |
| 6875 | 1 | 0  | 1  | 16 | 61.05   | 66.88   | 6.37   | o |
| 6876 | 1 | 1  | 1  | 16 | 679.99  | 636.98  | 35.03  | o |
| 6877 | 1 | 2  | 1  | 16 | 3.31    | 28.66   | 6.37   | o |

|      |   |    |   |    |         |         |        |   |
|------|---|----|---|----|---------|---------|--------|---|
| 6878 | 1 | -7 | 2 | 16 | 14.92   | 25.48   | 6.37   | o |
| 6879 | 1 | -6 | 2 | 16 | 123.63  | 146.51  | 9.55   | o |
| 6880 | 1 | -5 | 2 | 16 | 56.62   | 70.07   | 6.37   | o |
| 6881 | 1 | -4 | 2 | 16 | 60.64   | 66.88   | 6.37   | o |
| 6882 | 1 | -3 | 2 | 16 | 756.69  | 888.59  | 31.85  | o |
| 6883 | 1 | -1 | 2 | 16 | 1407.54 | 1423.66 | 47.77  | o |
| 6884 | 1 | 0  | 2 | 16 | 65.02   | 92.36   | 9.55   | o |
| 6885 | 1 | 1  | 2 | 16 | 790.30  | 697.50  | 38.22  | o |
| 6886 | 1 | 2  | 2 | 16 | 129.17  | 152.88  | 12.74  | o |
| 6887 | 1 | -7 | 3 | 16 | 368.13  | 442.70  | 38.22  | o |
| 6888 | 1 | -6 | 3 | 16 | 169.38  | 191.10  | 12.74  | o |
| 6889 | 1 | -5 | 3 | 16 | 221.36  | 248.42  | 15.92  | o |
| 6890 | 1 | -4 | 3 | 16 | 81.69   | 105.10  | 9.55   | o |
| 6891 | 1 | -3 | 3 | 16 | 122.19  | 168.80  | 9.55   | o |
| 6892 | 1 | -2 | 3 | 16 | 125.27  | 159.25  | 9.55   | o |
| 6893 | 1 | -1 | 3 | 16 | 101.94  | 105.10  | 9.55   | o |
| 6894 | 1 | 0  | 3 | 16 | 35.18   | 44.59   | 6.37   | o |
| 6895 | 1 | 1  | 3 | 16 | 1.25    | 3.18    | 3.18   | < |
| 6896 | 1 | 2  | 3 | 16 | 386.88  | 308.94  | 19.11  | o |
| 6897 | 1 | -7 | 4 | 16 | 819.81  | 1172.05 | 82.81  | o |
| 6898 | 1 | -6 | 4 | 16 | 1859.86 | 1573.35 | 89.18  | o |
| 6899 | 1 | -5 | 4 | 16 | 1215.00 | 1465.07 | 57.33  | o |
| 6900 | 1 | -4 | 4 | 16 | 670.70  | 872.67  | 38.22  | o |
| 6901 | 1 | -3 | 4 | 16 | 651.63  | 694.31  | 31.85  | o |
| 6902 | 1 | -2 | 4 | 16 | 1394.48 | 1442.77 | 57.33  | o |
| 6903 | 1 | -1 | 4 | 16 | 248.31  | 280.27  | 15.92  | o |
| 6904 | 1 | 0  | 4 | 16 | 4.27    | 19.11   | 3.18   | o |
| 6905 | 1 | -7 | 5 | 16 | 168.01  | 159.25  | 28.66  | o |
| 6906 | 1 | -6 | 5 | 16 | 294.10  | 379.01  | 35.03  | o |
| 6907 | 1 | -5 | 5 | 16 | 303.74  | 347.16  | 25.48  | o |
| 6908 | 1 | -4 | 5 | 16 | 75.38   | 76.44   | 9.55   | o |
| 6909 | 1 | -3 | 5 | 16 | 113.90  | 156.06  | 12.74  | o |
| 6910 | 1 | -2 | 5 | 16 | 45.63   | 63.70   | 9.55   | o |
| 6911 | 1 | -1 | 5 | 16 | 315.80  | 299.38  | 19.11  | o |
| 6912 | 1 | 0  | 5 | 16 | 2.31    | 6.37    | 3.18   | < |
| 6913 | 1 | 1  | 5 | 16 | 140.48  | 127.40  | 19.11  | o |
| 6914 | 1 | -6 | 6 | 16 | 183.43  | 194.28  | 22.29  | o |
| 6915 | 1 | -5 | 6 | 16 | 7.14    | 19.11   | 210.21 | < |
| 6916 | 1 | -4 | 6 | 16 | 327.53  | 369.45  | 35.03  | o |
| 6917 | 1 | -3 | 6 | 16 | 328.04  | 509.59  | 60.51  | o |
| 6918 | 1 | -2 | 6 | 16 | 473.93  | 509.59  | 41.40  | o |
| 6919 | 1 | -1 | 6 | 16 | 31.52   | 41.40   | 9.55   | o |
| 6920 | 1 | 0  | 6 | 16 | 116.41  | 165.62  | 19.11  | o |
| 6921 | 1 | -6 | 7 | 16 | 83.74   | 95.55   | 15.92  | o |
| 6922 | 1 | -5 | 7 | 16 | 187.82  | 162.43  | 19.11  | o |
| 6923 | 1 | -4 | 7 | 16 | 8.67    | 19.11   | 9.55   | < |
| 6924 | 1 | -3 | 7 | 16 | 402.35  | 410.86  | 38.22  | o |
| 6925 | 1 | -2 | 7 | 16 | 18.55   | 28.66   | 9.55   | < |
| 6926 | 1 | -1 | 7 | 16 | 83.70   | 76.44   | 12.74  | o |
| 6927 | 1 | -6 | 8 | 16 | 518.17  | 347.16  | 35.03  | o |
| 6928 | 1 | -5 | 8 | 16 | 361.69  | 480.92  | 41.40  | o |
| 6929 | 1 | -4 | 8 | 16 | 1106.19 | 968.22  | 98.73  | o |
| 6930 | 1 | -3 | 8 | 16 | 312.86  | 257.98  | 25.48  | o |
| 6931 | 1 | -2 | 8 | 16 | 513.54  | 235.68  | 207.02 | < |
